# Supplementary material
Source: PubMed Central journal article supplement (PMC5067740)

## Supporting Information

# A one-step selective exo-enzymatic labeling (SEEL) strategy for the biotinylation and identification of glycoproteins of living cells

Tiantian Sun<sup>a,b</sup>, Seok-Ho Yu<sup>a</sup>, Peng Zhao<sup>a</sup>, Lu Meng<sup>a</sup>, Kelley W. Moremen<sup>a,c</sup>,  
Lance Wells<sup>a,c</sup>, Richard Steet<sup>a,c</sup>, and Geert-Jan Boons<sup>a,b,d</sup>

<sup>a</sup>Complex Carbohydrate Research Center; <sup>b</sup>Department of Chemistry; <sup>c</sup>Department of Biochemistry and Molecular Biology, University of Georgia, 315 Riverbend Road, Athens, GA 30602, USA; and <sup>d</sup>Department of Chemical Biology and Drug Discovery, Utrecht Institute for Pharmaceutical Sciences, and Bijvoet Center for Biomolecular Research, Utrecht University, Universiteitsweg 99, 3584 CG Utrecht, The Netherlands

| <b>Contents</b>                                                                                                                         | <u>page</u> |
|-----------------------------------------------------------------------------------------------------------------------------------------|-------------|
| <b>Figure S1.</b> Comparison of metabolic labeling (Met), two-step SEEL (2S) and one-step SEEL (1S) in Jurkat, HepG2, and HEK293T cells | S2          |
| <b>Figure S2.</b> Sialidase-specific removal of biotinylated sialic acids from the cell surface                                         | S3          |
| <b>Table S1.</b> Proteomic analysis on cells labeled by two-step SEEL or one-step SEEL                                                  | S4          |
| <b>Table S2.</b> Summary of protein detection in HeLa cells under three different conditions                                            | S11         |
| <b>Table S3.</b> Total proteins (negative controls excluded) detected in HeLa cells under three different conditions                    | S12         |
| <b>Table S4.</b> Proteins that were detected and downregulated in condition B by 5 fold or more                                         | S33         |
| <b>Table S5.</b> Proteins that were downregulated by 5 fold or more or undetected in condition B                                        | S35         |
| <b>Table S6.</b> Proteins that changed by less than 25% in conditions B or C compared to A (static)                                     | S43         |
| <b>Table S7.</b> Total proteins (negative controls included) detected in HeLa cells under three different conditions                    | S44         |
| <b>Table S8.</b> Proteins detected by SEEL and cell surface biotinylation                                                               | S93         |
| Chemical Synthesis                                                                                                                      | S107        |
| References                                                                                                                              | S119        |
| Copies of NMR Spectra                                                                                                                   | S120        |

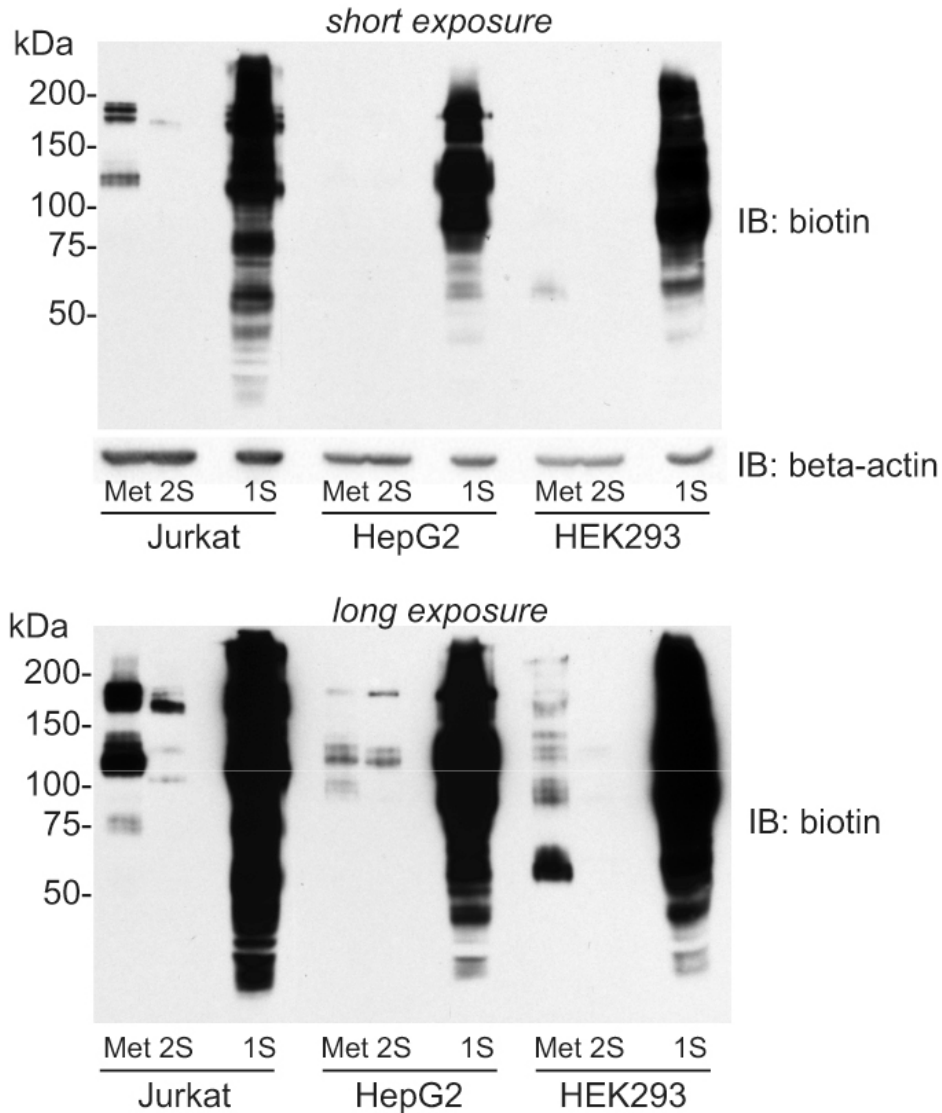

**Figure S1.** Comparison of metabolic labeling (Met), two-step SEEL (2S) and one-step SEEL (1S) in Jurkat, HepG2, and HEK293T cells. Cells were metabolically labeled with 60  $\mu$ M of Ac<sub>4</sub>ManNAz for 24 h prior to reaction with S-DIBO (as described for the HeLa cells in the Methods section). The two-step and one-step SEEL reactions with ST6Gal1 were performed as described in the Experimental section of the manuscript. Representative Western blots – short (top panel; 20 sec) and long (bottom panel; 2 min) - exposures are shown. Note that metabolic labeling detects a number of major glycoproteins in Jurkat cells, consistent with previous reports showing a high level of ManNAz incorporation in these cells. In all three cases, the one-step SEEL procedure results in the most efficient labeling. This is in line with the findings in HeLa cells and reflects the remarkable improvement in the labeling of major cell surface glycoproteins when CMP-sialic acid directly conjugated to biotin is used as a substrate in the one-step method.

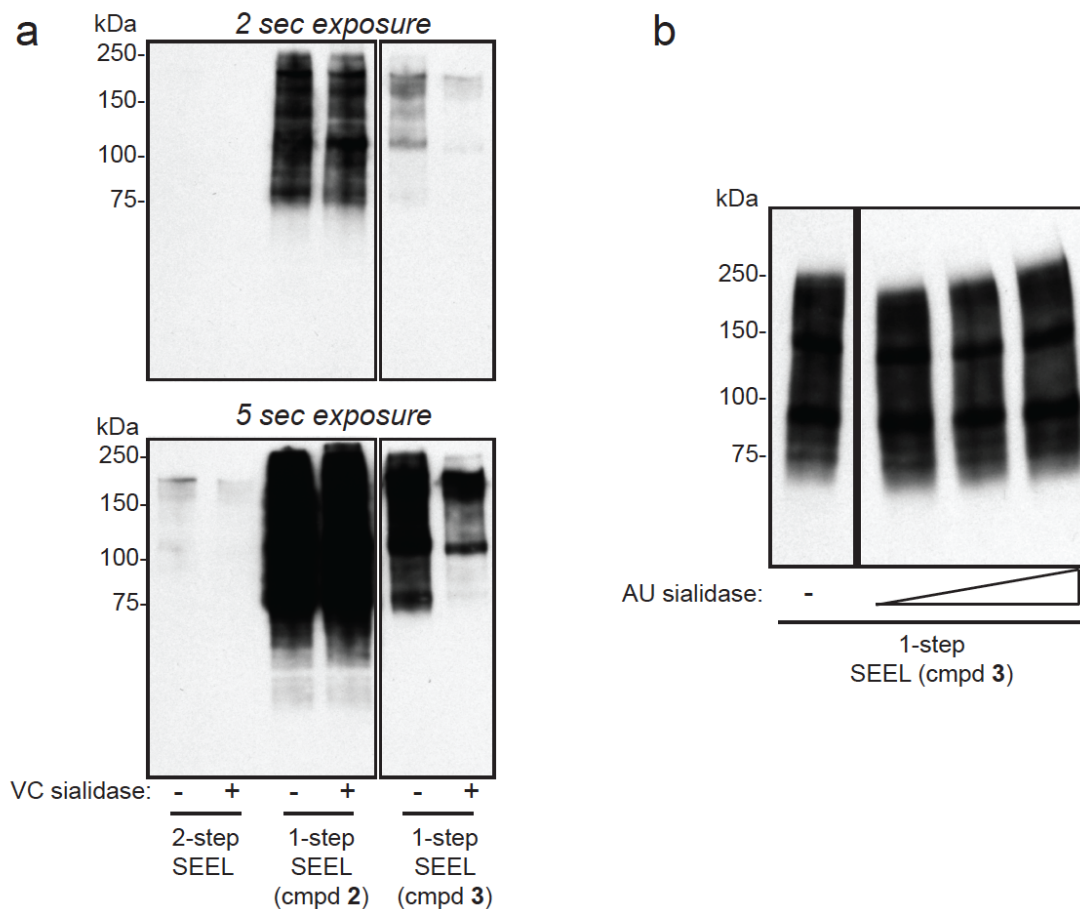

**Figure S2.** Sialidase-specific removal of biotinylated sialic acids from the cell surface. (a) Human fibroblasts were labeled using ST6Gal1 in either the two-step SEEL method (with CMP-Neu5Ac-9N<sub>3</sub> and S-DIBO) or the one-step SEEL method (with **2** or **3**) without prior sialic acid removal. Following labeling, cells were incubated in the presence or absence of 50 mU *Vibrio cholerae* (VC) sialidase for 1 h. Effects on labeled glycoproteins were detected by Western blotting with an HRP-conjugated anti-biotin antibody. (b) Fibroblasts labeled by SEEL (ST6Gal1 and compound **3**) were then treated with *Arthrobacter ureafaciens* (AU) sialidase with various doses (33 U/mL, 67 U/mL, or 133 U/mL) and labeled glycoproteins visualized by Western blotting. No detectable decrease of biotin labeling was observed.

**Table S1.** Proteomic analysis on cells labeled by two-step SEEL or one-step SEEL (with ST6Gal1)

| Labeling | UniProt                        | Protein                                                                 | Gene     | Detection  | Spectral Counts |        | Ratio of Spectral Counts (1step:2step) |        | Peptides | Protein Length (AA) | Protein Weight (kDa) | Organism     |
|----------|--------------------------------|-------------------------------------------------------------------------|----------|------------|-----------------|--------|----------------------------------------|--------|----------|---------------------|----------------------|--------------|
|          |                                |                                                                         |          |            | 2-step          | 1-step | 2-step                                 | 1-step |          |                     |                      |              |
| ST6GAL1  | sp O43157 PLXB1_HUMAN          | Plexin-B1                                                               | PLXNB1   | In 1&2step | 9               | 142    | 1                                      | 15,78  | 43       | 2135                | 232,13               | Homo sapiens |
| ST6GAL1  | sp P05026 AT1B1_HUMAN          | Sodium/potassium-transporting ATPase subunit beta-1                     | ATP1B1   | In 1&2step | 6               | 93     | 1                                      | 15,50  | 17       | 303                 | 35,02                | Homo sapiens |
| ST6GAL1  | sp P35052 GPC1_HUMAN           | Glypican-1                                                              | GPC1     | In 1&2step | 11              | 95     | 1                                      | 8,64   | 22       | 558                 | 61,62                | Homo sapiens |
| ST6GAL1  | sp Q96QD8 S38A2_HUMAN          | Sodium-coupled neutral amino acid transporter 2                         | SLC38A2  | In 1&2step | 9               | 73     | 1                                      | 8,11   | 21       | 506                 | 55,97                | Homo sapiens |
| ST6GAL1  | sp P10586 PTPRF_HUMAN          | Receptor-type tyrosine-protein phosphatase F                            | PTPRF    | In 1&2step | 109             | 820    | 1                                      | 7,52   | 148      | 1907                | 212,73               | Homo sapiens |
| ST6GAL1  | sp Q68D85 NR3L1_HUMAN          | Natural cytotoxicity triggering receptor 3 ligand 1                     | NCR3LG1  | In 1&2step | 11              | 80     | 1                                      | 7,27   | 22       | 454                 | 50,78                | Homo sapiens |
| ST6GAL1  | sp P17342 ANPRC_HUMAN          | Atrial natriuretic peptide receptor 3                                   | NPR3     | In 1&2step | 11              | 79     | 1                                      | 7,18   | 20       | 541                 | 59,75                | Homo sapiens |
| ST6GAL1  | sp O43854 EDIL3_HUMAN          | EGF-like repeat and discoidin I-like domain-containing protein 3        | EDIL3    | In 1&2step | 12              | 80     | 1                                      | 6,67   | 23       | 480                 | 53,71                | Homo sapiens |
| ST6GAL1  | sp P30530 UFO_HUMAN            | Tyrosine-protein kinase receptor UFO                                    | AXL      | In 1&2step | 7               | 45     | 1                                      | 6,43   | 19       | 894                 | 98,26                | Homo sapiens |
| ST6GAL1  | tr A0A024RBS4 A0A024RBS4_HUMAN | Scavenger receptor class B, member 1, isoform CRA_b                     | SCARB1   | In 1&2step | 32              | 204    | 1                                      | 6,38   | 36       | 509                 | 56,92                | Homo sapiens |
| ST6GAL1  | sp O75051 PLXA2_HUMAN          | Plexin-A2                                                               | PLXNA2   | In 1&2step | 3               | 19     | 1                                      | 6,33   | 11       | 1894                | 210,95               | Homo sapiens |
| ST6GAL1  | sp Q6P4Q7 CNNM4_HUMAN          | Metal transporter CNNM4                                                 | CNNM4    | In 1&2step | 15              | 92     | 1                                      | 6,13   | 39       | 775                 | 86,53                | Homo sapiens |
| ST6GAL1  | sp O75976 CBPD_HUMAN           | Carboxypeptidase D                                                      | CPD      | In 1&2step | 11              | 66     | 1                                      | 6,00   | 29       | 1380                | 152,82               | Homo sapiens |
| ST6GAL1  | sp P61073 CXCR4_HUMAN          | C-X-C chemokine receptor type 4                                         | CXCR4    | In 1&2step | 15              | 89     | 1                                      | 5,93   | 22       | 352                 | 39,70                | Homo sapiens |
| ST6GAL1  | sp Q9H2H9 S38A1_HUMAN          | Sodium-coupled neutral amino acid transporter 1                         | SLC38A1  | In 1&2step | 17              | 98     | 1                                      | 5,76   | 26       | 487                 | 53,99                | Homo sapiens |
| ST6GAL1  | sp Q8TB96 TIP_HUMAN            | T-cell immunomodulatory protein                                         | ITFG1    | In 1&2step | 7               | 40     | 1                                      | 5,71   | 12       | 612                 | 68,05                | Homo sapiens |
| ST6GAL1  | sp Q6ZRP7 QSOX2_HUMAN          | Sulfhydryl oxidase 2                                                    | QSOX2    | In 1&2step | 11              | 60     | 1                                      | 5,45   | 22       | 698                 | 77,46                | Homo sapiens |
| ST6GAL1  | tr A0A024R798 A0A024R798_HUMAN | Solute carrier family 44, member 2, isoform CRA_b                       | SLC44A2  | In 1&2step | 13              | 69     | 1                                      | 5,31   | 23       | 704                 | 79,80                | Homo sapiens |
| ST6GAL1  | sp Q92859 NEO1_HUMAN           | Neogenin                                                                | NEO1     | In 1&2step | 13              | 69     | 1                                      | 5,31   | 27       | 1461                | 159,90               | Homo sapiens |
| ST6GAL1  | sp Q9BY67 CADM1_HUMAN          | Cell adhesion molecule 1                                                | CADM1    | In 1&2step | 10              | 53     | 1                                      | 5,30   | 14       | 442                 | 48,46                | Homo sapiens |
| ST6GAL1  | sp Q96J84 KIRRL_HUMAN          | Kin of IRRE-like protein 1                                              | KIRREL   | In 1&2step | 26              | 137    | 1                                      | 5,27   | 36       | 757                 | 83,47                | Homo sapiens |
| ST6GAL1  | sp Q9Y653 GPR56_HUMAN          | G-protein coupled receptor 56                                           | GPR56    | In 1&2step | 4               | 21     | 1                                      | 5,25   | 10       | 693                 | 77,67                | Homo sapiens |
| ST6GAL1  | sp P29317 EPHA2_HUMAN          | Ephrin type-A receptor 2                                                | EPHA2    | In 1&2step | 28              | 146    | 1                                      | 5,21   | 44       | 976                 | 108,18               | Homo sapiens |
| ST6GAL1  | sp P54289 CA2D1_HUMAN          | Voltage-dependent calcium channel subunit alpha-2/delta-1               | CACNA2D1 | In 1&2step | 26              | 133    | 1                                      | 5,12   | 41       | 1103                | 124,47               | Homo sapiens |
| ST6GAL1  | sp Q8IWT6 LRRC8A_HUMAN         | Volume-regulated anion channel subunit LRRC8A                           | LRRC8A   | In 1&2step | 69              | 346    | 1                                      | 5,01   | 104      | 810                 | 94,12                | Homo sapiens |
| ST6GAL1  | sp Q9H0X4 ITFG3_HUMAN          | Protein ITFG3                                                           | ITFG3    | In 1&2step | 23              | 105    | 1                                      | 4,57   | 27       | 552                 | 59,60                | Homo sapiens |
| ST6GAL1  | sp Q6NSJ0 K1161_HUMAN          | Uncharacterized family 31 glucosidase KIAA1161                          | KIAA1161 | In 1&2step | 12              | 54     | 1                                      | 4,50   | 22       | 714                 | 81,02                | Homo sapiens |
| ST6GAL1  | sp P15509 CSF2R_HUMAN          | Granulocyte-macrophage colony-stimulating factor receptor subunit alpha | CSF2RA   | In 1&2step | 11              | 49     | 1                                      | 4,45   | 12       | 400                 | 46,16                | Homo sapiens |
| ST6GAL1  | sp P35613 BASI_HUMAN           | Basigin                                                                 | BSG      | In 1&2step | 141             | 597    | 1                                      | 4,23   | 34       | 385                 | 42,16                | Homo sapiens |
| ST6GAL1  | sp Q9NPH3 IL1AP_HUMAN          | Interleukin-1 receptor accessory protein                                | IL1RAP   | In 1&2step | 10              | 41     | 1                                      | 4,10   | 20       | 570                 | 65,36                | Homo sapiens |
| ST6GAL1  | sp Q13641 TPBG_HUMAN           | Trophoblast glycoprotein                                                | TPBG     | In 1&2step | 8               | 32     | 1                                      | 4,00   | 11       | 420                 | 45,98                | Homo sapiens |
| ST6GAL1  | sp Q9H1U4 MEGF9_HUMAN          | Multiple epidermal growth factor-like domains protein 9                 | MEGF9    | In 1&2step | 14              | 56     | 1                                      | 4,00   | 16       | 602                 | 62,92                | Homo sapiens |
| ST6GAL1  | sp Q9ULI3 HEG1_HUMAN           | Protein HEG homolog 1                                                   | HEG1     | In 1&2step | 18              | 72     | 1                                      | 4,00   | 21       | 1381                | 147,35               | Homo sapiens |
| ST6GAL1  | sp P35222 CTNB1_HUMAN          | Catenin beta-1                                                          | CTNNB1   | In 1&2step | 50              | 199    | 1                                      | 3,98   | 41       | 781                 | 85,42                | Homo sapiens |
| ST6GAL1  | sp P16066 ANPRA_HUMAN          | Atrial natriuretic peptide receptor 1                                   | NPR1     | In 1&2step | 23              | 91     | 1                                      | 3,96   | 37       | 1061                | 118,83               | Homo sapiens |
| ST6GAL1  | sp Q13332 PTPRS_HUMAN          | Receptor-type tyrosine-protein phosphatase 5                            | PTPRS    | In 1&2step | 74              | 281    | 1                                      | 3,80   | 63       | 1948                | 216,89               | Homo sapiens |
| ST6GAL1  | sp Q24JP5 T132A_HUMAN          | Transmembrane protein 132A                                              | TMEM132A | In 1&2step | 20              | 75     | 1                                      | 3,75   | 24       | 1023                | 110,02               | Homo sapiens |
| ST6GAL1  | sp P50895 BCAM_HUMAN           | Basal cell adhesion molecule                                            | BCAM     | In 1&2step | 65              | 242    | 1                                      | 3,72   | 55       | 628                 | 67,34                | Homo sapiens |
| ST6GAL1  | sp Q96PQ0 SORC2_HUMAN          | VPS10 domain-containing receptor SorCS2                                 | SORCS2   | In 1&2step | 21              | 77     | 1                                      | 3,67   | 32       | 1159                | 128,05               | Homo sapiens |
| ST6GAL1  | sp P19022 CDH2_HUMAN           | Cadherin-2                                                              | CDH2     | In 1&2step | 44              | 161    | 1                                      | 3,66   | 43       | 906                 | 99,73                | Homo sapiens |
| ST6GAL1  | sp Q9Y6N7 ROBO1_HUMAN          | Roundabout homolog 1                                                    | ROBO1    | In 1&2step | 254             | 911    | 1                                      | 3,59   | 170      | 1651                | 180,80               | Homo sapiens |
| ST6GAL1  | sp Q9H8M5 CNNM2_HUMAN          | Metal transporter CNNM2                                                 | CNNM2    | In 1&2step | 29              | 104    | 1                                      | 3,59   | 43       | 875                 | 96,54                | Homo sapiens |
| ST6GAL1  | sp Q7KYR7 BT2A1_HUMAN          | Butyrophilin subfamily 2 member A1                                      | BTN2A1   | In 1&2step | 29              | 103    | 1                                      | 3,55   | 26       | 527                 | 59,58                | Homo sapiens |
| ST6GAL1  | sp Q92896 GSLG1_HUMAN          | Golgi apparatus protein 1                                               | GLG1     | In 1&2step | 51              | 178    | 1                                      | 3,49   | 55       | 1179                | 134,45               | Homo sapiens |
| ST6GAL1  | sp Q86UN3 R4RL2_HUMAN          | Reticulon-4 receptor-like 2                                             | RTN4RL2  | In 1&2step | 23              | 80     | 1                                      | 3,48   | 17       | 420                 | 46,06                | Homo sapiens |

|         |                        |                                                                          |          |            |     |      |   |      |     |      |        |              |
|---------|------------------------|--------------------------------------------------------------------------|----------|------------|-----|------|---|------|-----|------|--------|--------------|
| ST6GAL1 | sp O14786 NRP1_HUMAN   | Neuropilin-1                                                             | NRP1     | In 1&2step | 60  | 208  | 1 | 3,47 | 65  | 923  | 103,05 | Homo sapiens |
| ST6GAL1 | sp P11717 MPRI_HUMAN   | Cation-independent mannose-6-phosphate receptor                          | IGF2R    | In 1&2step | 475 | 1623 | 1 | 3,42 | 300 | 2491 | 274,18 | Homo sapiens |
| ST6GAL1 | sp P04920 B3A2_HUMAN   | Anion exchange protein 2                                                 | SLC4A2   | In 1&2step | 53  | 179  | 1 | 3,38 | 48  | 1241 | 136,91 | Homo sapiens |
| ST6GAL1 | sp Q9Y639 NPTN_HUMAN   | Neuroplastin                                                             | NPTN     | In 1&2step | 37  | 124  | 1 | 3,35 | 23  | 398  | 44,34  | Homo sapiens |
| ST6GAL1 | sp O15439 MRP4_HUMAN   | Multidrug resistance-associated protein 4                                | ABCC4    | In 1&2step | 16  | 53   | 1 | 3,31 | 27  | 1325 | 149,41 | Homo sapiens |
| ST6GAL1 | sp P18433 PTPRA_HUMAN  | Receptor-type tyrosine-protein phosphatase alpha                         | PTPRA    | In 1&2step | 59  | 191  | 1 | 3,24 | 46  | 802  | 90,52  | Homo sapiens |
| ST6GAL1 | sp P01891 1A68_HUMAN   | HLA class I histocompatibility antigen, A-68 alpha chain                 | HLA-A    | In 1&2step | 9   | 29   | 1 | 3,22 | 14  | 365  | 40,87  | Homo sapiens |
| ST6GAL1 | sp Q92542 NICA_HUMAN   | Nicastrin                                                                | NCSTN    | In 1&2step | 66  | 212  | 1 | 3,21 | 35  | 709  | 78,34  | Homo sapiens |
| ST6GAL1 | sp Q13443 ADAM9_HUMAN  | Disintegrin and metalloproteinase domain-containing protein 9            | ADAM9    | In 1&2step | 10  | 32   | 1 | 3,20 | 19  | 819  | 90,48  | Homo sapiens |
| ST6GAL1 | sp Q9P244 LRFN1_HUMAN  | Leucine-rich repeat and fibronectin type III domain-containing protein 1 | LRFN1    | In 1&2step | 11  | 35   | 1 | 3,18 | 16  | 771  | 82,25  | Homo sapiens |
| ST6GAL1 | sp Q8NE01 CNNM3_HUMAN  | Metal transporter CNNM3                                                  | CNNM3    | In 1&2step | 37  | 112  | 1 | 3,03 | 42  | 707  | 76,05  | Homo sapiens |
| ST6GAL1 | sp P19256 LFA3_HUMAN   | Lymphocyte function-associated antigen 3                                 | CD58     | In 1&2step | 6   | 18   | 1 | 3,00 | 5   | 250  | 28,11  | Homo sapiens |
| ST6GAL1 | sp Q9UBG0 MRC2_HUMAN   | C-type mannose receptor 2                                                | MRC2     | In 1&2step | 26  | 76   | 1 | 2,92 | 33  | 1479 | 166,55 | Homo sapiens |
| ST6GAL1 | sp P14923 PLAK_HUMAN   | Junction plakoglobin                                                     | JUP      | In 1&2step | 146 | 405  | 1 | 2,77 | 92  | 745  | 81,67  | Homo sapiens |
| ST6GAL1 | sp Q14126 DSG2_HUMAN   | Desmoglein-2                                                             | DSG2     | In 1&2step | 256 | 705  | 1 | 2,75 | 135 | 1118 | 122,20 | Homo sapiens |
| ST6GAL1 | sp Q6YHK3 CD109_HUMAN  | CD109 antigen                                                            | CD109    | In 1&2step | 67  | 184  | 1 | 2,75 | 68  | 1445 | 161,57 | Homo sapiens |
| ST6GAL1 | sp P11166 GTR1_HUMAN   | Solute carrier family 2, facilitated glucose transporter member 1        | SLC2A1   | In 1&2step | 21  | 57   | 1 | 2,71 | 24  | 492  | 54,03  | Homo sapiens |
| ST6GAL1 | sp Q10589 BST2_HUMAN   | Bone marrow stromal antigen 2                                            | BST2     | In 1&2step | 6   | 16   | 1 | 2,67 | 6   | 180  | 19,74  | Homo sapiens |
| ST6GAL1 | sp O60245 PCDH7_HUMAN  | Protocadherin-7                                                          | PCDH7    | In 1&2step | 111 | 288  | 1 | 2,59 | 76  | 1069 | 115,98 | Homo sapiens |
| ST6GAL1 | sp P15529 MCP_HUMAN    | Membrane cofactor protein                                                | CD46     | In 1&2step | 110 | 285  | 1 | 2,59 | 27  | 392  | 43,70  | Homo sapiens |
| ST6GAL1 | sp O75691 UTP20_HUMAN  | Small subunit processome component 20 homolog                            | UTP20    | In 1&2step | 7   | 18   | 1 | 2,57 | 12  | 2785 | 318,16 | Homo sapiens |
| ST6GAL1 | sp Q9ULF5 S39AA_HUMAN  | Zinc transporter ZIP10                                                   | SLC39A10 | In 1&2step | 47  | 120  | 1 | 2,55 | 30  | 831  | 94,05  | Homo sapiens |
| ST6GAL1 | sp Q92485 ASM3B_HUMAN  | Acid sphingomyelinase-like phosphodiesterase 3b                          | SMPDL3B  | In 1&2step | 22  | 56   | 1 | 2,55 | 11  | 455  | 50,76  | Homo sapiens |
| ST6GAL1 | sp P01130 LDLR_HUMAN   | Low-density lipoprotein receptor                                         | LDLR     | In 1&2step | 55  | 139  | 1 | 2,53 | 40  | 860  | 95,30  | Homo sapiens |
| ST6GAL1 | sp P42892 ECE1_HUMAN   | Endothelin-converting enzyme 1                                           | ECE1     | In 1&2step | 149 | 372  | 1 | 2,50 | 62  | 770  | 87,09  | Homo sapiens |
| ST6GAL1 | sp Q15043 S39AE_HUMAN  | Zinc transporter ZIP14                                                   | SLC39A14 | In 1&2step | 61  | 151  | 1 | 2,48 | 25  | 492  | 54,16  | Homo sapiens |
| ST6GAL1 | sp Q14118 DAG1_HUMAN   | Dystroglycan                                                             | DAG1     | In 1&2step | 117 | 284  | 1 | 2,43 | 42  | 895  | 97,36  | Homo sapiens |
| ST6GAL1 | sp Q04721 NOTCH2_HUMAN | Neurogenic locus notch homolog protein 2                                 | NOTCH2   | In 1&2step | 146 | 350  | 1 | 2,40 | 103 | 2471 | 265,21 | Homo sapiens |
| ST6GAL1 | sp P54760 EPHB4_HUMAN  | Ephrin type-B receptor 4                                                 | EPHB4    | In 1&2step | 119 | 284  | 1 | 2,39 | 76  | 987  | 108,18 | Homo sapiens |
| ST6GAL1 | sp P33151 CADH5_HUMAN  | Cadherin-5                                                               | CDH5     | In 1&2step | 61  | 145  | 1 | 2,38 | 36  | 784  | 87,46  | Homo sapiens |
| ST6GAL1 | sp P23470 PTPRG_HUMAN  | Receptor-type tyrosine-protein phosphatase gamma                         | PTPRG    | In 1&2step | 95  | 224  | 1 | 2,36 | 61  | 1445 | 161,88 | Homo sapiens |
| ST6GAL1 | sp P15151 PVR_HUMAN    | Poliovirus receptor                                                      | PVR      | In 1&2step | 159 | 369  | 1 | 2,32 | 39  | 417  | 45,26  | Homo sapiens |
| ST6GAL1 | sp P11279 LAMP1_HUMAN  | Lysosome-associated membrane glycoprotein 1                              | LAMP1    | In 1&2step | 13  | 30   | 1 | 2,31 | 10  | 417  | 44,84  | Homo sapiens |
| ST6GAL1 | sp O00541 PES1_HUMAN   | Pescadillo homolog                                                       | PES1     | In 1&2step | 7   | 15   | 1 | 2,14 | 9   | 588  | 67,94  | Homo sapiens |
| ST6GAL1 | sp O75882 ATRN_HUMAN   | Attractin                                                                | ATRN     | In 1&2step | 63  | 134  | 1 | 2,13 | 42  | 1429 | 158,41 | Homo sapiens |
| ST6GAL1 | sp Q6EMK4 VASN_HUMAN   | Vasorin                                                                  | VASN     | In 1&2step | 53  | 112  | 1 | 2,11 | 22  | 673  | 71,65  | Homo sapiens |
| ST6GAL1 | sp P08174 DAF_HUMAN    | Complement decay-accelerating factor                                     | CD55     | In 1&2step | 227 | 476  | 1 | 2,10 | 55  | 381  | 41,36  | Homo sapiens |
| ST6GAL1 | sp Q02487 DSC2_HUMAN   | Desmocollin-2                                                            | DSC2     | In 1&2step | 17  | 35   | 1 | 2,06 | 16  | 901  | 99,88  | Homo sapiens |
| ST6GAL1 | sp P07996 TSP1_HUMAN   | Thrombospondin-1                                                         | THBS1    | In 1&2step | 49  | 100  | 1 | 2,04 | 42  | 1170 | 129,28 | Homo sapiens |
| ST6GAL1 | sp P05362 ICAM1_HUMAN  | Intercellular adhesion molecule 1                                        | ICAM1    | In 1&2step | 388 | 778  | 1 | 2,01 | 103 | 532  | 57,77  | Homo sapiens |
| ST6GAL1 | tr E9PGC5 E9PGC5_HUMAN | Receptor-type tyrosine-protein phosphatase kappa                         | PTPRK    | In 1&2step | 78  | 156  | 1 | 2,00 | 51  | 1472 | 165,90 | Homo sapiens |
| ST6GAL1 | sp O75197 LRP5_HUMAN   | Low-density lipoprotein receptor-related protein 5                       | LRP5     | In 1&2step | 19  | 37   | 1 | 1,95 | 21  | 1615 | 179,01 | Homo sapiens |
| ST6GAL1 | sp P04626 ERBB2_HUMAN  | Receptor tyrosine-protein kinase erbB-2                                  | ERBB2    | In 1&2step | 57  | 111  | 1 | 1,95 | 38  | 1255 | 137,80 | Homo sapiens |
| ST6GAL1 | sp Q15031 PLXB2_HUMAN  | Plexin-B2                                                                | PLXB2    | In 1&2step | 573 | 1088 | 1 | 1,90 | 206 | 1838 | 204,98 | Homo sapiens |
| ST6GAL1 | sp P16070 CD44_HUMAN   | CD44 antigen                                                             | CD44     | In 1&2step | 366 | 689  | 1 | 1,88 | 70  | 742  | 81,47  | Homo sapiens |
| ST6GAL1 | sp O60291 MGRN1_HUMAN  | E3 ubiquitin-protein ligase MGRN1                                        | MGRN1    | In 1&2step | 24  | 45   | 1 | 1,88 | 13  | 552  | 60,70  | Homo sapiens |
| ST6GAL1 | sp P21802 FGFR2_HUMAN  | Fibroblast growth factor receptor 2                                      | FGFR2    | In 1&2step | 13  | 24   | 1 | 1,85 | 17  | 821  | 91,95  | Homo sapiens |
| ST6GAL1 | sp Q01974 ROR2_HUMAN   | Tyrosine-protein kinase transmembrane receptor ROR2                      | ROR2     | In 1&2step | 111 | 194  | 1 | 1,75 | 57  | 943  | 104,67 | Homo sapiens |
| ST6GAL1 | sp Q13433 S39A6_HUMAN  | Zinc transporter ZIP6                                                    | SLC39A6  | In 1&2step | 37  | 64   | 1 | 1,73 | 21  | 755  | 84,98  | Homo sapiens |
| ST6GAL1 | sp Q9UHN6 TMEM2_HUMAN  | Transmembrane protein 2                                                  | TMEM2    | In 1&2step | 390 | 674  | 1 | 1,73 | 165 | 1383 | 154,26 | Homo sapiens |
| ST6GAL1 | sp P16144 ITB4_HUMAN   | Integrin beta-4                                                          | ITGB4    | In 1&2step | 154 | 265  | 1 | 1,72 | 88  | 1822 | 202,02 | Homo sapiens |

|         |                        |                                                                                                                                                     |          |            |      |      |   |      |     |      |        |              |
|---------|------------------------|-----------------------------------------------------------------------------------------------------------------------------------------------------|----------|------------|------|------|---|------|-----|------|--------|--------------|
| ST6GAL1 | sp Q13444 ADA15_HUMAN  | Disintegrin and metalloproteinase domain-containing protein 15                                                                                      | ADAM15   | In 1&2step | 64   | 110  | 1 | 1,72 | 31  | 863  | 92,88  | Homo sapiens |
| ST6GAL1 | sp Q9UIW2 PLXA1_HUMAN  | Plexin-A1                                                                                                                                           | PLXNA1   | In 1&2step | 302  | 518  | 1 | 1,72 | 130 | 1896 | 210,91 | Homo sapiens |
| ST6GAL1 | sp Q08722 CD47_HUMAN   | Leukocyte surface antigen CD47                                                                                                                      | CD47     | In 1&2step | 14   | 24   | 1 | 1,71 | 6   | 323  | 35,17  | Homo sapiens |
| ST6GAL1 | sp Q9UMF0 ICAM5_HUMAN  | Intercellular adhesion molecule 5                                                                                                                   | ICAM5    | In 1&2step | 7    | 12   | 1 | 1,71 | 11  | 924  | 97,04  | Homo sapiens |
| ST6GAL1 | sp Q5ZPR3 CD276_HUMAN  | CD276 antigen                                                                                                                                       | CD276    | In 1&2step | 285  | 486  | 1 | 1,71 | 40  | 534  | 57,18  | Homo sapiens |
| ST6GAL1 | sp P17813 EGLN_HUMAN   | Endoglin                                                                                                                                            | ENG      | In 1&2step | 182  | 309  | 1 | 1,70 | 73  | 658  | 70,52  | Homo sapiens |
| ST6GAL1 | sp Q07954 LRP1_HUMAN   | Prolow-density lipoprotein receptor-related protein 1                                                                                               | LRP1     | In 1&2step | 226  | 377  | 1 | 1,67 | 155 | 4544 | 504,26 | Homo sapiens |
| ST6GAL1 | sp P08648 ITA5_HUMAN   | Integrin alpha-5                                                                                                                                    | ITGA5    | In 1&2step | 136  | 226  | 1 | 1,66 | 58  | 1049 | 114,45 | Homo sapiens |
| ST6GAL1 | sp Q13740 CD166_HUMAN  | CD166 antigen                                                                                                                                       | ALCAM    | In 1&2step | 294  | 467  | 1 | 1,59 | 71  | 583  | 65,04  | Homo sapiens |
| ST6GAL1 | sp Q9NYQ6 CELR1_HUMAN  | Cadherin EGF LAG seven-pass G-type receptor 1                                                                                                       | CELSR1   | In 1&2step | 96   | 152  | 1 | 1,58 | 60  | 3014 | 329,26 | Homo sapiens |
| ST6GAL1 | tr B7ZLDO B7ZLDO_HUMAN | LRP6 protein                                                                                                                                        | LRP6     | In 1&2step | 72   | 114  | 1 | 1,58 | 45  | 1568 | 175,32 | Homo sapiens |
| ST6GAL1 | sp P0CW18 PRSS56_HUMAN | Serine protease 56                                                                                                                                  | PRSS56   | In 1&2step | 38   | 60   | 1 | 1,58 | 23  | 603  | 64,54  | Homo sapiens |
| ST6GAL1 | sp P06756 ITAV_HUMAN   | Integrin alpha-V                                                                                                                                    | ITGAV    | In 1&2step | 466  | 733  | 1 | 1,57 | 158 | 1048 | 115,95 | Homo sapiens |
| ST6GAL1 | sp Q14574 DSC3_HUMAN   | Desmocollin-3                                                                                                                                       | DSC3     | In 1&2step | 16   | 25   | 1 | 1,56 | 15  | 896  | 99,89  | Homo sapiens |
| ST6GAL1 | sp P26012 ITB8_HUMAN   | Integrin beta-8                                                                                                                                     | ITGB8    | In 1&2step | 32   | 50   | 1 | 1,56 | 24  | 769  | 85,56  | Homo sapiens |
| ST6GAL1 | sp P48509 CD151_HUMAN  | CD151 antigen                                                                                                                                       | CD151    | In 1&2step | 35   | 54   | 1 | 1,54 | 18  | 253  | 28,26  | Homo sapiens |
| ST6GAL1 | sp P05556 ITB1_HUMAN   | Integrin beta-1                                                                                                                                     | ITGB1    | In 1&2step | 648  | 987  | 1 | 1,52 | 145 | 798  | 88,34  | Homo sapiens |
| ST6GAL1 | sp Q94826 TOM70_HUMAN  | Mitochondrial import receptor subunit TOM70                                                                                                         | TOMM70A  | In 1&2step | 2    | 3    | 1 | 1,50 | 4   | 608  | 67,39  | Homo sapiens |
| ST6GAL1 | sp Q969V3 NCLN_HUMAN   | Nicalin                                                                                                                                             | NCLN     | In 1&2step | 15   | 22   | 1 | 1,47 | 12  | 563  | 62,92  | Homo sapiens |
| ST6GAL1 | tr B3KNK2 B3KNK2_HUMAN | cDNA FLJ14770 fis, clone NT2RP3004207, highly similar to Homo sapiens seizure related 6 homolog (mouse)-like 2 (SEZ6L2), transcript variant 1, mRNA | SEZ6L2   | In 1&2step | 10   | 14   | 1 | 1,40 | 9   | 674  | 73,55  | Homo sapiens |
| ST6GAL1 | sp P56199 ITA1_HUMAN   | Integrin alpha-1                                                                                                                                    | ITGA1    | In 1&2step | 224  | 313  | 1 | 1,40 | 76  | 1179 | 130,75 | Homo sapiens |
| ST6GAL1 | sp Q6PJG9 LRFN4_HUMAN  | Leucine-rich repeat and fibronectin type-III domain-containing protein 4                                                                            | LRFN4    | In 1&2step | 33   | 46   | 1 | 1,39 | 24  | 635  | 66,80  | Homo sapiens |
| ST6GAL1 | sp Q969P0 IGSF8_HUMAN  | Immunoglobulin superfamily member 8                                                                                                                 | IGSF8    | In 1&2step | 89   | 119  | 1 | 1,34 | 31  | 613  | 64,98  | Homo sapiens |
| ST6GAL1 | sp P18084 ITB5_HUMAN   | Integrin beta-5                                                                                                                                     | ITGB5    | In 1&2step | 194  | 256  | 1 | 1,32 | 80  | 799  | 87,98  | Homo sapiens |
| ST6GAL1 | sp Q9P273 TEN3_HUMAN   | Teneurin-3                                                                                                                                          | TENM3    | In 1&2step | 288  | 379  | 1 | 1,32 | 149 | 2699 | 300,74 | Homo sapiens |
| ST6GAL1 | sp Q12913 PTPRJ_HUMAN  | Receptor-type tyrosine-protein phosphatase eta                                                                                                      | PTPRJ    | In 1&2step | 241  | 305  | 1 | 1,27 | 73  | 1337 | 145,83 | Homo sapiens |
| ST6GAL1 | sp Q9Y4D7 PLXD1_HUMAN  | Plexin-D1                                                                                                                                           | PLXND1   | In 1&2step | 169  | 213  | 1 | 1,26 | 66  | 1925 | 211,85 | Homo sapiens |
| ST6GAL1 | sp O00468 AGRIN_HUMAN  | Agrin                                                                                                                                               | AGRN     | In 1&2step | 209  | 259  | 1 | 1,24 | 123 | 2067 | 217,07 | Homo sapiens |
| ST6GAL1 | sp P08069 IGF1R_HUMAN  | Insulin-like growth factor 1 receptor                                                                                                               | IGF1R    | In 1&2step | 487  | 597  | 1 | 1,23 | 162 | 1367 | 154,68 | Homo sapiens |
| ST6GAL1 | sp Q13501 SQSTM1_HUMAN | Sequestosome-1                                                                                                                                      | SQSTM1   | In 1&2step | 9    | 11   | 1 | 1,22 | 6   | 440  | 47,64  | Homo sapiens |
| ST6GAL1 | sp P23229 ITA6_HUMAN   | Integrin alpha-6                                                                                                                                    | ITGA6    | In 1&2step | 228  | 262  | 1 | 1,15 | 79  | 1130 | 126,51 | Homo sapiens |
| ST6GAL1 | sp Q9HCM3 K1549_HUMAN  | UPF0606 protein KIAA1549                                                                                                                            | KIAA1549 | In 1&2step | 103  | 118  | 1 | 1,15 | 55  | 1950 | 210,61 | Homo sapiens |
| ST6GAL1 | sp P06213 INSR_HUMAN   | Insulin receptor                                                                                                                                    | INSR     | In 1&2step | 484  | 554  | 1 | 1,14 | 149 | 1382 | 156,21 | Homo sapiens |
| ST6GAL1 | sp Q92692 PVRL2_HUMAN  | Nectin-2                                                                                                                                            | PVRL2    | In 1&2step | 60   | 67   | 1 | 1,12 | 19  | 538  | 57,69  | Homo sapiens |
| ST6GAL1 | sp Q95672 ECEL1_HUMAN  | Endothelin-converting enzyme-like 1                                                                                                                 | ECEL1    | In 1&2step | 37   | 41   | 1 | 1,11 | 25  | 775  | 87,72  | Homo sapiens |
| ST6GAL1 | sp P32004 L1CAM_HUMAN  | Neural cell adhesion molecule L1                                                                                                                    | L1CAM    | In 1&2step | 925  | 997  | 1 | 1,08 | 174 | 1257 | 139,90 | Homo sapiens |
| ST6GAL1 | sp P08581 MET_HUMAN    | Hepatocyte growth factor receptor                                                                                                                   | MET      | In 1&2step | 349  | 375  | 1 | 1,07 | 120 | 1390 | 155,42 | Homo sapiens |
| ST6GAL1 | sp O15230 LAMA5_HUMAN  | Laminin subunit alpha-5                                                                                                                             | LAMA5    | In 1&2step | 546  | 581  | 1 | 1,06 | 245 | 3695 | 399,46 | Homo sapiens |
| ST6GAL1 | sp Q9P2B2 FPRP_HUMAN   | Prostaglandin F2 receptor negative regulator                                                                                                        | PTGFRN   | In 1&2step | 124  | 130  | 1 | 1,05 | 37  | 879  | 98,48  | Homo sapiens |
| ST6GAL1 | sp Q6UVK1 CSPG4_HUMAN  | Chondroitin sulfate proteoglycan 4                                                                                                                  | CSPG4    | In 1&2step | 1175 | 1222 | 1 | 1,04 | 292 | 2322 | 250,36 | Homo sapiens |
| ST6GAL1 | sp P26006 ITA3_HUMAN   | Integrin alpha-3                                                                                                                                    | ITGA3    | In 1&2step | 208  | 214  | 1 | 1,03 | 55  | 1051 | 116,52 | Homo sapiens |
| ST6GAL1 | sp O75054 IGSF3_HUMAN  | Immunoglobulin superfamily member 3                                                                                                                 | IGSF3    | In 1&2step | 38   | 39   | 1 | 1,03 | 31  | 1194 | 135,09 | Homo sapiens |
| ST6GAL1 | sp P11047 LAMC1_HUMAN  | Laminin subunit gamma-1                                                                                                                             | LAMC1    | In 1&2step | 173  | 167  | 1 | 0,97 | 77  | 1609 | 177,47 | Homo sapiens |
| ST6GAL1 | sp Q08554 DSC1_HUMAN   | Desmocollin-1                                                                                                                                       | DSC1     | In 1&2step | 18   | 17   | 1 | 0,94 | 10  | 894  | 99,91  | Homo sapiens |
| ST6GAL1 | sp P17301 ITA2_HUMAN   | Integrin alpha-2                                                                                                                                    | ITGA2    | In 1&2step | 98   | 92   | 1 | 0,94 | 40  | 1181 | 129,20 | Homo sapiens |
| ST6GAL1 | sp O75131 CPNE3_HUMAN  | Copine-3                                                                                                                                            | CPNE3    | In 1&2step | 11   | 10   | 1 | 0,91 | 10  | 537  | 60,07  | Homo sapiens |
| ST6GAL1 | sp Q95573 ACSL3_HUMAN  | Long-chain-fatty-acid--CoA ligase 3                                                                                                                 | ACSL3    | In 1&2step | 14   | 12   | 1 | 0,86 | 7   | 720  | 80,35  | Homo sapiens |
| ST6GAL1 | sp P48643 TCPE_HUMAN   | T-complex protein 1 subunit epsilon                                                                                                                 | CCT5     | In 1&2step | 6    | 5    | 1 | 0,83 | 4   | 541  | 59,61  | Homo sapiens |
| ST6GAL1 | sp P07942 LAMB1_HUMAN  | Laminin subunit beta-1                                                                                                                              | LAMB1    | In 1&2step | 157  | 127  | 1 | 0,81 | 69  | 1786 | 197,89 | Homo sapiens |
| ST6GAL1 | sp Q9HCU4 CELR2_HUMAN  | Cadherin EGF LAG seven-pass G-type receptor 2                                                                                                       | CELSR2   | In 1&2step | 81   | 65   | 1 | 0,80 | 42  | 2923 | 317,23 | Homo sapiens |
| ST6GAL1 | sp Q14517 FAT1_HUMAN   | Protocadherin Fat 1                                                                                                                                 | FAT1     | In 1&2step | 243  | 194  | 1 | 0,80 | 150 | 4588 | 505,94 | Homo sapiens |
| ST6GAL1 | sp P43121 MUC18_HUMAN  | Cell surface glycoprotein MUC18                                                                                                                     | MCAM     | In 1&2step | 818  | 644  | 1 | 0,79 | 128 | 646  | 71,54  | Homo sapiens |

|         |                        |                                                                         |         |            |    |      |   |      |     |       |         |              |
|---------|------------------------|-------------------------------------------------------------------------|---------|------------|----|------|---|------|-----|-------|---------|--------------|
| ST6GAL1 | tr B5ME49 B5ME49_HUMAN | AP-1 complex subunit mu-1                                               | AP1M1   | In 1&2step | 20 | 14   | 1 | 0,70 | 4   | 14507 | 1518,22 | Homo sapiens |
| ST6GAL1 | sp P28288 ABCD3_HUMAN  | ATP-binding cassette sub-family D member 3                              | ABCD3   | In 1&2step | 12 | 8    | 1 | 0,67 | 10  | 659   | 75,41   | Homo sapiens |
| ST6GAL1 | sp O60488 ACSL4_HUMAN  | Long-chain-fatty-acid--CoA ligase 4                                     | ACSL4   | In 1&2step | 6  | 4    | 1 | 0,67 | 5   | 711   | 79,12   | Homo sapiens |
| ST6GAL1 | sp Q02413 DSG1_HUMAN   | Desmoglein-1                                                            | DSG1    | In 1&2step | 60 | 28   | 1 | 0,47 | 25  | 1049  | 113,66  | Homo sapiens |
| ST6GAL1 | sp Q6V0I7 FAT4_HUMAN   | Protocadherin Fat 4                                                     | FAT4    | In 1&2step | 86 | 32   | 1 | 0,37 | 55  | 4981  | 542,33  | Homo sapiens |
| ST6GAL1 | sp P12956 XRCC6_HUMAN  | X-ray repair cross-complementing protein 6                              | XRCC6   | In 1&2step | 12 | 3    | 1 | 0,25 | 10  | 609   | 69,78   | Homo sapiens |
| ST6GAL1 | sp Q9B2C7 ABCA2_HUMAN  | ATP-binding cassette sub-family A member 2                              | ABCA2   | In 1step   |    | 37   |   |      | 15  | 2435  | 269,68  | Homo sapiens |
| ST6GAL1 | sp Q9NP58 ABC6_HUMAN   | ATP-binding cassette sub-family B member 6, mitochondrial               | ABC6    | In 1step   |    | 5    |   |      | 3   | 842   | 93,81   | Homo sapiens |
| ST6GAL1 | sp P33527 MRP1_HUMAN   | Multidrug resistance-associated protein 1                               | ABCC1   | In 1step   |    | 119  |   |      | 40  | 1531  | 171,46  | Homo sapiens |
| ST6GAL1 | sp O15440 MRP5_HUMAN   | Multidrug resistance-associated protein 5                               | ABCC5   | In 1step   |    | 21   |   |      | 7   | 1437  | 160,54  | Homo sapiens |
| ST6GAL1 | sp P61221 ABCE1_HUMAN  | ATP-binding cassette sub-family E member 1                              | ABCE1   | In 1step   |    | 139  |   |      | 22  | 599   | 67,25   | Homo sapiens |
| ST6GAL1 | sp Q9H845 ACAD9_HUMAN  | Acyl-CoA dehydrogenase family member 9, mitochondrial                   | ACAD9   | In 1step   |    | 6    |   |      | 3   | 621   | 68,70   | Homo sapiens |
| ST6GAL1 | sp Q04771 ACVR1_HUMAN  | Activin receptor type-1                                                 | ACVR1   | In 1step   |    | 5    |   |      | 3   | 509   | 57,10   | Homo sapiens |
| ST6GAL1 | sp O14672 ADA10_HUMAN  | Disintegrin and metalloproteinase domain-containing protein 10          | ADAM10  | In 1step   |    | 29   |   |      | 10  | 748   | 84,07   | Homo sapiens |
| ST6GAL1 | sp P78536 ADA17_HUMAN  | Disintegrin and metalloproteinase domain-containing protein 17          | ADAM17  | In 1step   |    | 26   |   |      | 10  | 824   | 92,94   | Homo sapiens |
| ST6GAL1 | sp O60503 ADCY9_HUMAN  | Adenylate cyclase type 9                                                | ADCY9   | In 1step   |    | 7    |   |      | 4   | 1353  | 150,59  | Homo sapiens |
| ST6GAL1 | sp Q8IVF2 AHNK2_HUMAN  | Protein AHNK2                                                           | AHNAK2  | In 1step   |    | 21   |   |      | 5   | 5795  | 616,22  | Homo sapiens |
| ST6GAL1 | sp P02765 FETUA_HUMAN  | Alpha-2-HS-glycoprotein                                                 | AHSG    | In 1step   |    | 11   |   |      | 2   | 367   | 39,28   | Homo sapiens |
| ST6GAL1 | sp P09923 PPBI_HUMAN   | Intestinal-type alkaline phosphatase                                    | ALPI    | In 1step   |    | 532  |   |      | 46  | 528   | 56,76   | Homo sapiens |
| ST6GAL1 | sp P05187 PPB1_HUMAN   | Alkaline phosphatase, placental type                                    | ALPP    | In 1step   |    | 69   |   |      | 13  | 535   | 57,90   | Homo sapiens |
| ST6GAL1 | sp P10696 PPBN_HUMAN   | Alkaline phosphatase, placental-like                                    | ALPPL2  | In 1step   |    | 8    |   |      | 2   | 532   | 57,32   | Homo sapiens |
| ST6GAL1 | sp Q9HCJ1 ANKH_HUMAN   | Progressive ankylosis protein homolog                                   | ANKH    | In 1step   |    | 31   |   |      | 10  | 492   | 54,19   | Homo sapiens |
| ST6GAL1 | sp P15144 ANPN_HUMAN   | Aminopeptidase N                                                        | ANPEP   | In 1step   |    | 37   |   |      | 15  | 967   | 109,45  | Homo sapiens |
| ST6GAL1 | sp Q9H6X2 ANTR1_HUMAN  | Anthrax toxin receptor 1                                                | ANTXR1  | In 1step   |    | 16   |   |      | 6   | 564   | 62,73   | Homo sapiens |
| ST6GAL1 | sp P08133 ANXA6_HUMAN  | Annexin A6                                                              | ANXA6   | In 1step   |    | 16   |   |      | 7   | 673   | 75,81   | Homo sapiens |
| ST6GAL1 | sp O94973 AP2A2_HUMAN  | AP-2 complex subunit alpha-2                                            | AP2A2   | In 1step   |    | 6    |   |      | 3   | 939   | 103,88  | Homo sapiens |
| ST6GAL1 | sp P13637 AT1A3_HUMAN  | Sodium/potassium-transporting ATPase subunit alpha-3                    | ATP1A3  | In 1step   |    | 27   |   |      | 2   | 1013  | 111,66  | Homo sapiens |
| ST6GAL1 | sp P54709 AT1B3_HUMAN  | Sodium/potassium-transporting ATPase subunit beta-3                     | ATP1B3  | In 1step   |    | 43   |   |      | 5   | 279   | 31,47   | Homo sapiens |
| ST6GAL1 | sp Q9Y5Z0 BACE2_HUMAN  | Beta-secretase 2                                                        | BACE2   | In 1step   |    | 17   |   |      | 6   | 518   | 56,13   | Homo sapiens |
| ST6GAL1 | sp P51587 BRCA2_HUMAN  | Breast cancer type 2 susceptibility protein                             | BRCA2   | In 1step   |    | 10   |   |      | 5   | 3418  | 383,97  | Homo sapiens |
| ST6GAL1 | sp Q5VU97 CAHD1_HUMAN  | VWFA and cache domain-containing protein 1                              | CACHD1  | In 1step   |    | 38   |   |      | 15  | 1274  | 142,18  | Homo sapiens |
| ST6GAL1 | sp Q8NFZ8 CADM4_HUMAN  | Cell adhesion molecule 4                                                | CADM4   | In 1step   |    | 29   |   |      | 7   | 388   | 42,74   | Homo sapiens |
| ST6GAL1 | sp Q03135 CAV1_HUMAN   | Caveolin-1                                                              | CAV1    | In 1step   |    | 26   |   |      | 5   | 178   | 20,44   | Homo sapiens |
| ST6GAL1 | sp Q9NPF0 CD320_HUMAN  | CD320 antigen                                                           | CD320   | In 1step   |    | 20   |   |      | 3   | 282   | 28,95   | Homo sapiens |
| ST6GAL1 | sp P48960 CD97_HUMAN   | CD97 antigen                                                            | CD97    | In 1step   |    | 559  |   |      | 53  | 835   | 91,79   | Homo sapiens |
| ST6GAL1 | sp Q07065 CKAP4_HUMAN  | Cytoskeleton-associated protein 4                                       | CKAP4   | In 1step   |    | 3    |   |      | 2   | 602   | 65,96   | Homo sapiens |
| ST6GAL1 | sp O76031 CLPX_HUMAN   | ATP-dependent Clp protease ATP-binding subunit clpX-like, mitochondrial | CLPX    | In 1step   |    | 20   |   |      | 8   | 633   | 69,16   | Homo sapiens |
| ST6GAL1 | sp Q9NRU3 CNNM1_HUMAN  | Metal transporter CNNM1                                                 | CNNM1   | In 1step   |    | 3    |   |      | 2   | 951   | 104,27  | Homo sapiens |
| ST6GAL1 | sp Q99715 COCA1_HUMAN  | Collagen alpha-1(XII) chain                                             | COL12A1 | In 1step   |    | 195  |   |      | 67  | 3063  | 332,92  | Homo sapiens |
| ST6GAL1 | sp P14384 CBPM_HUMAN   | Carboxypeptidase M                                                      | CPM     | In 1step   |    | 7    |   |      | 2   | 443   | 50,46   | Homo sapiens |
| ST6GAL1 | sp P35221 CTNA1_HUMAN  | Catenin alpha-1                                                         | CTNNA1  | In 1step   |    | 34   |   |      | 12  | 906   | 99,99   | Homo sapiens |
| ST6GAL1 | sp P81605 DCD_HUMAN    | Dermcidin                                                               | DCD     | In 1step   |    | 11   |   |      | 3   | 110   | 11,26   | Homo sapiens |
| ST6GAL1 | sp Q08345 DDR1_HUMAN   | Epithelial discoidin domain-containing receptor 1                       | DDR1    | In 1step   |    | 9    |   |      | 6   | 913   | 101,05  | Homo sapiens |
| ST6GAL1 | sp Q16832 DDR2_HUMAN   | Discoidin domain-containing receptor 2                                  | DDR2    | In 1step   |    | 77   |   |      | 19  | 855   | 96,66   | Homo sapiens |
| ST6GAL1 | sp P00533 EGFR_HUMAN   | Epidermal growth factor receptor                                        | EGFR    | In 1step   |    | 1522 |   |      | 135 | 1210  | 134,17  | Homo sapiens |
| ST6GAL1 | sp Q9UHX3 EMR2_HUMAN   | EGF-like module-containing mucin-like hormone receptor-like 2           | EMR2    | In 1step   |    | 6    |   |      | 2   | 823   | 90,39   | Homo sapiens |
| ST6GAL1 | sp P29323 EPHB2_HUMAN  | Ephrin type-B receptor 2                                                | EPHB2   | In 1step   |    | 22   |   |      | 9   | 1055  | 117,40  | Homo sapiens |
| ST6GAL1 | sp P54753 EPHB3_HUMAN  | Ephrin type-B receptor 3                                                | EPHB3   | In 1step   |    | 5    |   |      | 2   | 998   | 110,24  | Homo sapiens |
| ST6GAL1 | sp Q9BSJ8 ESYT1_HUMAN  | Extended synaptotagmin-1                                                | ESYT1   | In 1step   |    | 3    |   |      | 2   | 1104  | 122,76  | Homo sapiens |

|         |                        |                                                                |           |          |     |    |      |        |              |
|---------|------------------------|----------------------------------------------------------------|-----------|----------|-----|----|------|--------|--------------|
| ST6GAL1 | sp Q7L8L6 FAKD5_HUMAN  | FAST kinase domain-containing protein 5                        | FASTKD5   | In 1step | 6   | 3  | 764  | 86,50  | Homo sapiens |
| ST6GAL1 | sp P35555 FBN1_HUMAN   | Fibrillin-1                                                    | FBN1      | In 1step | 17  | 6  | 2871 | 312,00 | Homo sapiens |
| ST6GAL1 | sp P20930 FILA_HUMAN   | Filaggrin                                                      | FLG       | In 1step | 8   | 3  | 4061 | 434,90 | Homo sapiens |
| ST6GAL1 | sp P06241 FYN_HUMAN    | Tyrosine-protein kinase Fyn                                    | FYN       | In 1step | 6   | 3  | 537  | 60,71  | Homo sapiens |
| ST6GAL1 | sp Q14332 FZD2_HUMAN   | Frizzled-2                                                     | FZD2      | In 1step | 14  | 5  | 565  | 63,49  | Homo sapiens |
| ST6GAL1 | sp Q10472 GALT1_HUMAN  | Polypeptide N-acetylgalactosaminyltransferase 1                | GALNT1    | In 1step | 10  | 4  | 559  | 64,16  | Homo sapiens |
| ST6GAL1 | sp P19440 GGT1_HUMAN   | Gamma-glutamyltranspeptidase 1                                 | GGT1      | In 1step | 29  | 9  | 569  | 61,35  | Homo sapiens |
| ST6GAL1 | sp P16278 GBAL_HUMAN   | Beta-galactosidase                                             | GLB1      | In 1step | 6   | 3  | 677  | 76,01  | Homo sapiens |
| ST6GAL1 | sp P15586 GNS_HUMAN    | N-acetylglucosamine-6-sulfatase                                | GNS       | In 1step | 21  | 7  | 552  | 62,02  | Homo sapiens |
| ST6GAL1 | sp O00461 GOLIM4_HUMAN | Golgi integral membrane protein 4                              | GOLIM4    | In 1step | 14  | 5  | 696  | 81,81  | Homo sapiens |
| ST6GAL1 | sp P43304 GPDH_HUMAN   | Glycerol-3-phosphate dehydrogenase, mitochondrial              | GPD2      | In 1step | 37  | 16 | 727  | 80,78  | Homo sapiens |
| ST6GAL1 | sp Q8IWK6 GP125_HUMAN  | Probable G-protein coupled receptor 125                        | GPR125    | In 1step | 17  | 8  | 1321 | 146,04 | Homo sapiens |
| ST6GAL1 | sp Q8NFI5 RAI3_HUMAN   | Retinoic acid-induced protein 3                                | GPRC5A    | In 1step | 32  | 7  | 357  | 40,21  | Homo sapiens |
| ST6GAL1 | sp P78347 GTF2I_HUMAN  | General transcription factor II-I                              | GTF2I     | In 1step | 7   | 3  | 998  | 112,33 | Homo sapiens |
| ST6GAL1 | sp P07900 HS90A_HUMAN  | Heat shock protein HSP 90-alpha                                | HSP90AAA1 | In 1step | 18  | 7  | 732  | 84,59  | Homo sapiens |
| ST6GAL1 | sp P08107 HSP71_HUMAN  | Heat shock 70 kDa protein 1A/1B                                | HSPA1A    | In 1step | 42  | 16 | 641  | 69,99  | Homo sapiens |
| ST6GAL1 | sp O75144 ICOSL_HUMAN  | ICOS ligand                                                    | ICOSLG    | In 1step | 9   | 3  | 302  | 33,31  | Homo sapiens |
| ST6GAL1 | sp P17181 INAR1_HUMAN  | Interferon alpha/beta receptor 1                               | IFNAR1    | In 1step | 19  | 6  | 557  | 63,47  | Homo sapiens |
| ST6GAL1 | sp P40189 IL6RB_HUMAN  | Interleukin-6 receptor subunit beta                            | IL6ST     | In 1step | 8   | 5  | 918  | 103,45 | Homo sapiens |
| ST6GAL1 | sp Q16891 MIC60_HUMAN  | MICOS complex subunit MIC60                                    | IMMT      | In 1step | 16  | 8  | 758  | 83,61  | Homo sapiens |
| ST6GAL1 | sp Q96J02 ITCH_HUMAN   | E3 ubiquitin-protein ligase Itchy homolog                      | ITCH      | In 1step | 5   | 3  | 903  | 102,72 | Homo sapiens |
| ST6GAL1 | sp Q9Y219 JAG2_HUMAN   | Protein jagged-2                                               | JAG2      | In 1step | 15  | 6  | 1238 | 133,26 | Homo sapiens |
| ST6GAL1 | sp Q9ULH0 KDIS_HUMAN   | Kinase D-interacting substrate of 220 kDa                      | KIDINS220 | In 1step | 60  | 25 | 1771 | 196,40 | Homo sapiens |
| ST6GAL1 | sp Q14974 IMB1_HUMAN   | Importin subunit beta-1                                        | KPNB1     | In 1step | 6   | 4  | 876  | 97,09  | Homo sapiens |
| ST6GAL1 | sp P24043 LAMA2_HUMAN  | Laminin subunit alpha-2                                        | LAMA2     | In 1step | 9   | 4  | 3122 | 343,67 | Homo sapiens |
| ST6GAL1 | sp Q9BXB1 LGR4_HUMAN   | Leucine-rich repeat-containing G-protein coupled receptor 4    | LGR4      | In 1step | 14  | 6  | 951  | 104,39 | Homo sapiens |
| ST6GAL1 | sp P42702 LIFR_HUMAN   | Leukemia inhibitory factor receptor                            | LIFR      | In 1step | 33  | 11 | 1097 | 123,65 | Homo sapiens |
| ST6GAL1 | sp Q96JA1 LRIG1_HUMAN  | Leucine-rich repeats and immunoglobulin-like domains protein 1 | LRIG1     | In 1step | 12  | 6  | 1093 | 119,02 | Homo sapiens |
| ST6GAL1 | sp Q14114 LRP8_HUMAN   | Low-density lipoprotein receptor-related protein 8             | LRP8      | In 1step | 15  | 7  | 963  | 105,55 | Homo sapiens |
| ST6GAL1 | sp Q8TDW0 LRRC8_HUMAN  | Volume-regulated anion channel subunit LRRC8C                  | LRRC8C    | In 1step | 43  | 18 | 803  | 92,37  | Homo sapiens |
| ST6GAL1 | sp Q7L1W4 LRRC8D_HUMAN | Volume-regulated anion channel subunit LRRC8D                  | LRRC8D    | In 1step | 70  | 29 | 858  | 98,12  | Homo sapiens |
| ST6GAL1 | sp Q6NSJ5 LRRC8E_HUMAN | Volume-regulated anion channel subunit LRRC8E                  | LRRC8E    | In 1step | 103 | 34 | 796  | 90,17  | Homo sapiens |
| ST6GAL1 | sp O95274 LYPD3_HUMAN  | Ly6/PLAUR domain-containing protein 3                          | LYPD3     | In 1step | 27  | 5  | 346  | 35,93  | Homo sapiens |
| ST6GAL1 | sp Q9P1T7 MDFIC_HUMAN  | MyoD family inhibitor domain-containing protein                | MDFIC     | In 1step | 8   | 3  | 246  | 25,75  | Homo sapiens |
| ST6GAL1 | sp P55082 MFAP3_HUMAN  | Microfibril-associated glycoprotein 3                          | MFAP3     | In 1step | 6   | 3  | 362  | 40,12  | Homo sapiens |
| ST6GAL1 | sp P08582 TRFM_HUMAN   | Melanotransferrin                                              | MF12      | In 1step | 4   | 2  | 738  | 80,15  | Homo sapiens |
| ST6GAL1 | sp P15941 MUC1_HUMAN   | Mucin-1                                                        | MUC1      | In 1step | 15  | 2  | 1255 | 122,01 | Homo sapiens |
| ST6GAL1 | sp Q9NZM1 MYOF_HUMAN   | Myoferlin                                                      | MYOF      | In 1step | 238 | 65 | 2061 | 234,54 | Homo sapiens |
| ST6GAL1 | sp Q8NFI24 NLGN2_HUMAN | Neurologin-2                                                   | NLGN2     | In 1step | 7   | 4  | 835  | 90,74  | Homo sapiens |
| ST6GAL1 | sp P46531 NOTCH1_HUMAN | Neurogenic locus notch homolog protein 1                       | NOTCH1    | In 1step | 48  | 17 | 2555 | 272,31 | Homo sapiens |
| ST6GAL1 | sp Q92823 NRCAM_HUMAN  | Neuronal cell adhesion molecule                                | NRCAM     | In 1step | 32  | 16 | 1304 | 143,78 | Homo sapiens |
| ST6GAL1 | sp O60462 NRP2_HUMAN   | Neuropilin-2                                                   | NRP2      | In 1step | 10  | 5  | 931  | 104,77 | Homo sapiens |
| ST6GAL1 | sp Q99650 OSMR_HUMAN   | Oncostatin-M-specific receptor subunit beta                    | OSMR      | In 1step | 16  | 8  | 979  | 110,42 | Homo sapiens |
| ST6GAL1 | sp Q9H6A9 PCX3_HUMAN   | Pecanex-like protein 3                                         | PCNXL3    | In 1step | 31  | 14 | 2034 | 221,88 | Homo sapiens |
| ST6GAL1 | sp Q8WUM4 PDC6I_HUMAN  | Programmed cell death 6-interacting protein                    | PDCD6IP   | In 1step | 20  | 9  | 868  | 95,95  | Homo sapiens |
| ST6GAL1 | sp Q92508 PIEZO1_HUMAN | Piezo-type mechanosensitive ion channel component 1            | PIEZO1    | In 1step | 147 | 29 | 2521 | 286,59 | Homo sapiens |
| ST6GAL1 | sp Q9H5I5 PIEZO2_HUMAN | Piezo-type mechanosensitive ion channel component 2            | PIEZO2    | In 1step | 38  | 17 | 2752 | 317,84 | Homo sapiens |
| ST6GAL1 | sp Q8IV08 PLD3_HUMAN   | Phospholipase D3                                               | PLD3      | In 1step | 6   | 4  | 490  | 54,65  | Homo sapiens |
| ST6GAL1 | sp O00469 PLOD2_HUMAN  | Procollagen-lysine,2-oxoglutarate 5-dioxygenase 2              | PLOD2     | In 1step | 13  | 6  | 737  | 84,61  | Homo sapiens |
| ST6GAL1 | sp Q9NZ53 PDXL2_HUMAN  | Podocalyxin-like protein 2                                     | PODXL2    | In 1step | 10  | 2  | 605  | 65,02  | Homo sapiens |
| ST6GAL1 | sp P07602 SAP_HUMAN    | Prosaposin                                                     | PSAP      | In 1step | 30  | 9  | 524  | 58,06  | Homo sapiens |
| ST6GAL1 | sp P26599 PTBP1_HUMAN  | Polypyrimidine tract-binding protein 1                         | PTBP1     | In 1step | 19  | 6  | 531  | 57,17  | Homo sapiens |



|         |                        |                                                                   |         |          |     |    |      |        |              |
|---------|------------------------|-------------------------------------------------------------------|---------|----------|-----|----|------|--------|--------------|
| ST6GAL1 | sp Q13308 PTK7_HUMAN   | Inactive tyrosine-protein kinase 7                                | PTK7    | In 1step | 31  | 13 | 1070 | 118,30 | Homo sapiens |
| ST6GAL1 | sp Q9P035 HACD3_HUMAN  | Very-long-chain (3R)-3-hydroxyacyl-CoA dehydratase 3              | PTPLAD1 | In 1step | 20  | 7  | 362  | 43,11  | Homo sapiens |
| ST6GAL1 | sp Q15223 PVRL1_HUMAN  | Nectin-1                                                          | PVRL1   | In 1step | 10  | 3  | 517  | 57,10  | Homo sapiens |
| ST6GAL1 | sp Q9NQ53 PVRL3_HUMAN  | Nectin-3                                                          | PVRL3   | In 1step | 34  | 11 | 549  | 60,95  | Homo sapiens |
| ST6GAL1 | sp Q92626 PXDN_HUMAN   | Peroxidasin homolog                                               | PXDN    | In 1step | 9   | 5  | 1479 | 165,15 | Homo sapiens |
| ST6GAL1 | sp P61026 RAB10_HUMAN  | Ras-related protein Rab-10                                        | RAB10   | In 1step | 15  | 5  | 200  | 22,51  | Homo sapiens |
| ST6GAL1 | sp P49792 RBP2_HUMAN   | E3 SUMO-protein ligase RanBP2                                     | RANBP2  | In 1step | 7   | 5  | 3224 | 357,96 | Homo sapiens |
| ST6GAL1 | sp Q5JTH9 RRP12_HUMAN  | RRP12-like protein                                                | RRP12   | In 1step | 8   | 4  | 1297 | 143,59 | Homo sapiens |
| ST6GAL1 | sp P34925 RYK_HUMAN    | Tyrosine-protein kinase RYK                                       | RYK     | In 1step | 11  | 4  | 604  | 67,45  | Homo sapiens |
| ST6GAL1 | sp Q6UWP8 SBSN_HUMAN   | Suprabasin                                                        | SBSN    | In 1step | 3   | 2  | 590  | 60,49  | Homo sapiens |
| ST6GAL1 | sp Q9C0C4 SEMA4C_HUMAN | Semaphorin-4C                                                     | SEMA4C  | In 1step | 4   | 3  | 833  | 92,55  | Homo sapiens |
| ST6GAL1 | sp Q8NFY4 SEMA6D_HUMAN | Semaphorin-6D                                                     | SEMA6D  | In 1step | 15  | 6  | 1073 | 119,78 | Homo sapiens |
| ST6GAL1 | sp O75533 SF3B1_HUMAN  | Splicing factor 3B subunit 1                                      | SF3B1   | In 1step | 14  | 5  | 1304 | 145,72 | Homo sapiens |
| ST6GAL1 | sp P78324 SHPS1_HUMAN  | Tyrosine-protein phosphatase non-receptor type substrate 1        | SIRPA   | In 1step | 39  | 7  | 504  | 54,91  | Homo sapiens |
| ST6GAL1 | sp P55011 S12A2_HUMAN  | Solute carrier family 12 member 2                                 | SLC12A2 | In 1step | 45  | 21 | 1212 | 131,35 | Homo sapiens |
| ST6GAL1 | sp Q9Y666 S12A7_HUMAN  | Solute carrier family 12 member 7                                 | SLC12A7 | In 1step | 214 | 44 | 1083 | 119,01 | Homo sapiens |
| ST6GAL1 | sp Q00325 MPCP_HUMAN   | Phosphate carrier protein, mitochondrial                          | SLC25A3 | In 1step | 62  | 14 | 362  | 40,05  | Homo sapiens |
| ST6GAL1 | sp Q99808 S29A1_HUMAN  | Equilibrative nucleoside transporter 1                            | SLC29A1 | In 1step | 8   | 2  | 456  | 50,17  | Homo sapiens |
| ST6GAL1 | sp P11169 GTR3_HUMAN   | Solute carrier family 2, facilitated glucose transporter member 3 | SLC2A3  | In 1step | 34  | 9  | 496  | 53,87  | Homo sapiens |
| ST6GAL1 | sp Q9Y6M5 ZNT1_HUMAN   | Zinc transporter 1                                                | SLC30A1 | In 1step | 85  | 25 | 507  | 55,25  | Homo sapiens |
| ST6GAL1 | tr B5M450 B5M450_HUMAN | Solute carrier family 4 sodium bicarbonate cotransporter member 7 | SLC4A7  | In 1step | 31  | 12 | 1210 | 135,20 | Homo sapiens |
| ST6GAL1 | sp P31641 SC6A6_HUMAN  | Sodium- and chloride-dependent taurine transporter                | SLC6A6  | In 1step | 40  | 12 | 620  | 69,77  | Homo sapiens |
| ST6GAL1 | sp P48067 SC6A9_HUMAN  | Sodium- and chloride-dependent glycine transporter 1              | SLC6A9  | In 1step | 7   | 3  | 706  | 78,19  | Homo sapiens |
| ST6GAL1 | sp P30825 CTR1_HUMAN   | High affinity cationic amino acid transporter 1                   | SLC7A1  | In 1step | 4   | 2  | 629  | 67,58  | Homo sapiens |
| ST6GAL1 | sp Q9UYP5 XCT_HUMAN    | Cystine/glutamate transporter                                     | SLC7A11 | In 1step | 69  | 13 | 501  | 55,37  | Homo sapiens |
| ST6GAL1 | sp Q92536 YLAT2_HUMAN  | Y+L amino acid transporter 2                                      | SLC7A6  | In 1step | 33  | 8  | 515  | 56,77  | Homo sapiens |
| ST6GAL1 | sp Q5DT21 ISK9_HUMAN   | Serine protease inhibitor Kazal-type 9                            | SPINK9  | In 1step | 7   | 2  | 86   | 9,73   | Homo sapiens |
| ST6GAL1 | sp O43278 SPIT1_HUMAN  | Kunitz-type protease inhibitor 1                                  | SPINT1  | In 1step | 22  | 7  | 529  | 58,34  | Homo sapiens |
| ST6GAL1 | sp Q05519 SRS11_HUMAN  | Serine/arginine-rich splicing factor 11                           | SRSF11  | In 1step | 4   | 2  | 484  | 53,49  | Homo sapiens |
| ST6GAL1 | sp Q658P3 STEAP3_HUMAN | Metalloreductase STEAP3                                           | STEAP3  | In 1step | 4   | 2  | 488  | 54,55  | Homo sapiens |
| ST6GAL1 | sp Q687X5 STEAP4_HUMAN | Metalloreductase STEAP4                                           | STEAP4  | In 1step | 141 | 33 | 459  | 51,93  | Homo sapiens |
| ST6GAL1 | sp P27105 STOM_HUMAN   | Erythrocyte band 7 integral membrane protein                      | STOM    | In 1step | 70  | 20 | 288  | 31,69  | Homo sapiens |
| ST6GAL1 | sp Q9BX79 STRA6_HUMAN  | Stimulated by retinoic acid gene 6 protein homolog                | STRA6   | In 1step | 37  | 11 | 667  | 73,44  | Homo sapiens |
| ST6GAL1 | sp Q6N022 TEN4_HUMAN   | Teneurin-4                                                        | TENM4   | In 1step | 10  | 2  | 2769 | 307,74 | Homo sapiens |
| ST6GAL1 | sp Q03167 TGFB3_HUMAN  | Transforming growth factor beta receptor type 3                   | TGFBR3  | In 1step | 30  | 10 | 851  | 93,42  | Homo sapiens |
| ST6GAL1 | sp Q9NV96 CC50A_HUMAN  | Cell cycle control protein 50A                                    | TMEM30A | In 1step | 9   | 4  | 361  | 40,64  | Homo sapiens |
| ST6GAL1 | sp P41273 TNFSF9_HUMAN | Tumor necrosis factor ligand superfamily member 9                 | TNFSF9  | In 1step | 9   | 4  | 254  | 26,59  | Homo sapiens |
| ST6GAL1 | sp Q96QT4 TRPM7_HUMAN  | Transient receptor potential cation channel subfamily M member 7  | TRPM7   | In 1step | 9   | 5  | 1865 | 212,54 | Homo sapiens |
| ST6GAL1 | sp Q9C0H2 TTYH3_HUMAN  | Protein tweety homolog 3                                          | TTYH3   | In 1step | 4   | 2  | 523  | 57,49  | Homo sapiens |
| ST6GAL1 | sp Q06418 TYRO3_HUMAN  | Tyrosine-protein kinase receptor TYRO3                            | TYRO3   | In 1step | 36  | 12 | 890  | 96,83  | Homo sapiens |
| ST6GAL1 | sp Q9NYU2 UGGT1_HUMAN  | UDP-glucose:glycoprotein glucosyltransferase 1                    | UGGT1   | In 1step | 7   | 5  | 1555 | 177,06 | Homo sapiens |
| ST6GAL1 | sp P04004 VTNC_HUMAN   | Vitronectin                                                       | VTN     | In 1step | 25  | 4  | 478  | 54,25  | Homo sapiens |
| ST6GAL1 | sp O00308 WWP2_HUMAN   | NEDD4-like E3 ubiquitin-protein ligase WWP2                       | WWP2    | In 1step | 4   | 2  | 870  | 98,83  | Homo sapiens |
| ST6GAL1 | sp O14980 XPO1_HUMAN   | Exportin-1                                                        | XPO1    | In 1step | 2   | 2  | 1071 | 123,29 | Homo sapiens |
| ST6GAL1 | sp Q9UBH6 XPR1_HUMAN   | Xenotropic and polytropic retrovirus receptor 1                   | XPR1    | In 1step | 22  | 9  | 696  | 81,47  | Homo sapiens |
| ST6GAL1 | sp P07355 ANXA2_HUMAN  | Annexin A2                                                        | ANXA2   | In 2step | 16  | 7  | 339  | 38,56  | Homo sapiens |
| ST6GAL1 | sp P63010 AP2B1_HUMAN  | AP-2 complex subunit beta                                         | AP2B1   | In 2step | 4   | 2  | 937  | 104,47 | Homo sapiens |
| ST6GAL1 | sp P48444 COPD_HUMAN   | Coatomer subunit delta                                            | ARCN1   | In 2step | 9   | 4  | 511  | 57,16  | Homo sapiens |
| ST6GAL1 | sp P20648 ATP4A_HUMAN  | Potassium-transporting ATPase alpha chain 1                       | ATP4A   | In 2step | 7   | 2  | 1035 | 114,03 | Homo sapiens |
| ST6GAL1 | sp P40227 TCPZ_HUMAN   | T-complex protein 1 subunit zeta                                  | CCT6A   | In 2step | 21  | 8  | 531  | 57,97  | Homo sapiens |

|         |                                |                                                                |          |          |     |    |       |         |              |
|---------|--------------------------------|----------------------------------------------------------------|----------|----------|-----|----|-------|---------|--------------|
| ST6GAL1 | sp Q8NE62 CHDH_HUMAN           | Choline dehydrogenase, mitochondrial                           | CHDH     | In 2step | 11  | 5  | 594   | 65,30   | Homo sapiens |
| ST6GAL1 | sp P55060 XPO2_HUMAN           | Exportin-2                                                     | CSE1L    | In 2step | 4   | 3  | 971   | 110,33  | Homo sapiens |
| ST6GAL1 | sp P55884 EIF3B_HUMAN          | Eukaryotic translation initiation factor 3 subunit B           | EIF3B    | In 2step | 5   | 3  | 814   | 92,41   | Homo sapiens |
| ST6GAL1 | sp Q5D862 FILA2_HUMAN          | Filaggrin-2                                                    | FLG2     | In 2step | 13  | 4  | 2391  | 247,91  | Homo sapiens |
| ST6GAL1 | sp Q10471 GALT2_HUMAN          | Polypeptide N-acetylgalactosaminyltransferase 2                | GALNT2   | In 2step | 11  | 4  | 571   | 64,67   | Homo sapiens |
| ST6GAL1 | sp A6NGU5 GGT3_HUMAN           | Putative gamma-glutamyltranspeptidase 3                        | GGT3P    | In 2step | 9   | 4  | 568   | 61,44   | Homo sapiens |
| ST6GAL1 | sp Q16666 IF16_HUMAN           | Gamma-interferon-inducible protein 16                          | IF16     | In 2step | 3   | 3  | 785   | 88,18   | Homo sapiens |
| ST6GAL1 | sp A1L0T0 ILVBL_HUMAN          | Acetolactate synthase-like protein                             | ILVBL    | In 2step | 3   | 2  | 632   | 67,81   | Homo sapiens |
| ST6GAL1 | sp Q9NZR2 LRP1B_HUMAN          | Low-density lipoprotein receptor-related protein 1B            | LRP1B    | In 2step | 7   | 2  | 4599  | 515,14  | Homo sapiens |
| ST6GAL1 | tr A0A023SGA8 A0A023SGA8_HUMAN | Truncated MHC class I polypeptide-related protein A (Fragment) | MICA     | In 2step | 23  | 4  | 308   | 35,47   | Homo sapiens |
| ST6GAL1 | sp P46013 KI67_HUMAN           | Antigen KI-67                                                  | MKI67    | In 2step | 8   | 6  | 3256  | 358,46  | Homo sapiens |
| ST6GAL1 | sp Q8WXI7 MUC16_HUMAN          | Mucin-16                                                       | MUC16    | In 2step | 144 | 29 | 22152 | 2363,14 | Homo sapiens |
| ST6GAL1 | sp P30414 NKTR_HUMAN           | NK-tumor recognition protein                                   | NKTR     | In 2step | 3   | 2  | 1462  | 165,56  | Homo sapiens |
| ST6GAL1 | sp P07237 PDIA1_HUMAN          | Protein disulfide-isomerase                                    | P4HB     | In 2step | 5   | 2  | 508   | 57,06   | Homo sapiens |
| ST6GAL1 | sp P12273 PIP_HUMAN            | Prolactin-inducible protein                                    | PIP      | In 2step | 7   | 3  | 146   | 16,54   | Homo sapiens |
| ST6GAL1 | sp Q02809 PLOD1_HUMAN          | Procollagen-lysine,2-oxoglutarate 5-dioxygenase 1              | PLOD1    | In 2step | 4   | 2  | 727   | 83,48   | Homo sapiens |
| ST6GAL1 | sp O00592 PODXL_HUMAN          | Podocalyxin                                                    | PODXL    | In 2step | 138 | 11 | 558   | 58,58   | Homo sapiens |
| ST6GAL1 | sp Q01082 SPTB2_HUMAN          | Spectrin beta chain, non-erythrocytic 1                        | SPTBN1   | In 2step | 11  | 8  | 2364  | 274,42  | Homo sapiens |
| ST6GAL1 | sp Q96SB4 SRPK1_HUMAN          | SRSF protein kinase 1                                          | SRPK1    | In 2step | 3   | 3  | 655   | 74,26   | Homo sapiens |
| ST6GAL1 | sp Q5JTV8 TOIP1_HUMAN          | Torsin-1A-interacting protein 1                                | TOR1AIP1 | In 2step | 4   | 2  | 583   | 66,19   | Homo sapiens |
| ST6GAL1 | sp O43670 ZNF207_HUMAN         | BUB3-interacting and GLEBS motif-containing protein            | ZNF207   | In 2step | 4   | 2  | 478   | 50,70   | Homo sapiens |

**Table S2.** Summary of protein detection in HeLa cells under three different conditions.

| Conditions   | <sup>2</sup> Total proteins | <sup>2</sup> Cell surface proteins | <sup>2</sup> Proteins commonly detected in A, B, & C | <sup>2</sup> Cell surface proteins commonly detected in A, B, & C | <sup>2</sup> Proteins detected in A & C but not in B | <sup>2</sup> Proteins detected only in A | <sup>3</sup> Detected and downregulated in B by 5 fold or more | <sup>3</sup> Recovered in C by 3 fold or more | <sup>4</sup> Downregulated by 5 fold or more or undetected in B | <sup>4</sup> Recovered to detected or 3 fold or more in C | <sup>5</sup> Changed by less than 25% compared to A in B or C (Static) |
|--------------|-----------------------------|------------------------------------|------------------------------------------------------|-------------------------------------------------------------------|------------------------------------------------------|------------------------------------------|----------------------------------------------------------------|-----------------------------------------------|-----------------------------------------------------------------|-----------------------------------------------------------|------------------------------------------------------------------------|
| (A)0hr       | 282                         | 255                                | 173                                                  | 161                                                               | 29                                                   | 59                                       | 31                                                             | 11                                            | 119                                                             | 40                                                        | 11                                                                     |
| (B)16hr      | 219                         | 187                                |                                                      |                                                                   |                                                      |                                          |                                                                | 11                                            |                                                                 | 40                                                        |                                                                        |
| (C)16hr(+Ch) | 244                         | 222                                |                                                      |                                                                   |                                                      |                                          |                                                                | 11                                            |                                                                 | 40                                                        |                                                                        |

<sup>2</sup>Table S3

<sup>3</sup>Table S4

<sup>4</sup>Table S5

<sup>5</sup>Table S6

**Table S3.** Total proteins (negative controls excluded) detected in HeLa cells under three different conditions.

| UniProt Accession | Protein                                                                                                                 | Gene   | Cell Surface Proteins | Detection          | Total Peptides | NormSC-0hr | NormSC-16hr | NormSC-16hrCh | 0hr/0hr | 16hr/0hr | 16hrCh/0hr | (+)/(-) Chloroquine |
|-------------------|-------------------------------------------------------------------------------------------------------------------------|--------|-----------------------|--------------------|----------------|------------|-------------|---------------|---------|----------|------------|---------------------|
| P33527            | Multidrug resistance-associated protein 1                                                                               | ABCC1  | Cell surface protein  | In 0&16&16hr(+) Ch | 168            | 158,67     | 330         | 250           | 1       | 2,08     | 1,58       | 0,76                |
| O15439            | Multidrug resistance-associated protein 4                                                                               | ABCC4  | Cell surface protein  | In 0&16&16hr(+) Ch | 116            | 70,67      | 205         | 161           | 1       | 2,90     | 2,28       | 0,79                |
| O15440            | Multidrug resistance-associated protein 5                                                                               | ABCC5  | Cell surface protein  | In 0&16&16hr(+) Ch | 32             | 28,00      | 22          | 36            | 1       | 0,79     | 1,29       | 1,64                |
| O60488            | Long-chain-fatty-acid--CoA ligase 4                                                                                     | ACSL4  | Cell surface protein  | In 0&16&16hr(+) Ch | 16             | 5,33       | 11          | 20            | 1       | 2,06     | 3,75       | 1,82                |
| Q13444            | Disintegrin and metalloproteinase domain-containing protein 15                                                          | ADAM15 | Cell surface protein  | In 0&16&16hr(+) Ch | 40             | 146,67     | 30          | 43            | 1       | 0,20     | 0,29       | 1,43                |
| P78536            | Disintegrin and metalloproteinase domain-containing protein 17                                                          | ADAM17 | Cell surface protein  | In 0&16&16hr(+) Ch | 24             | 34,67      | 18          | 14            | 1       | 0,52     | 0,40       | 0,78                |
| O60503            | Adenylate cyclase type 9                                                                                                | ADCY9  | Cell surface protein  | In 0&16&16hr(+) Ch | 22             | 9,33       | 20          | 23            | 1       | 2,14     | 2,46       | 1,15                |
| O00468            | Agrin                                                                                                                   | AGRN   | Cell surface protein  | In 0&16&16hr(+) Ch | 75             | 345,33     | 12          | 16            | 1       | 0,03     | 0,05       | 1,33                |
| Q8IVF2            | Protein AHNAK2                                                                                                          | AHNAK2 | Cell surface protein  | In 0&16&16hr(+) Ch | 10             | 28,00      | 12          | 7             | 1       | 0,43     | 0,25       | 0,58                |
| P02765            | Alpha-2-HS-glycoprotein                                                                                                 | AHSG   | Cell surface protein  | In 0&16&16hr(+) Ch | 7              | 14,67      | 7           | 5             | 1       | 0,48     | 0,34       | 0,71                |
| Q13740            | CD166 antigen                                                                                                           | ALCAM  | Cell surface protein  | In 0&16&16hr(+) Ch | 122            | 622,67     | 380         | 409           | 1       | 0,61     | 0,66       | 1,08                |
| P15144            | Aminopeptidase N                                                                                                        | ANPEP  | Cell surface protein  | In 0&16&16hr(+) Ch | 36             | 49,33      | 18          | 53            | 1       | 0,36     | 1,07       | 2,94                |
| B5ME49            | AP-1 complex subunit mu 1                                                                                               | AP1M1  | Cell surface protein  | In 0&16&16hr(+) Ch | 6              | 18,67      | 12          | 13            | 1       | 0,64     | 0,70       | 1,08                |
| B3KW93            | cDNA FLJ42590 fis, clone BRACE3009708, highly similar to Sodium/potassium-transporting ATPase alpha-2chain (EC 3.6.3.9) | ATP1A2 | Cell surface protein  | In 0&16&16hr(+) Ch | 12             | 18,67      | 32          | 32            | 1       | 1,71     | 1,71       | 1,00                |
| P13637            | Sodium/potassium-transporting ATPase subunit alpha-3                                                                    | ATP1A3 | Cell surface protein  | In 0&16&16hr(+) Ch | 8              | 36,00      | 24          | 34            | 1       | 0,67     | 0,94       | 1,42                |

|        |                                                           |          |                      |                          |     |        |     |     |   |      |      |      |
|--------|-----------------------------------------------------------|----------|----------------------|--------------------------|-----|--------|-----|-----|---|------|------|------|
| P05026 | Sodium/potassium-transporting ATPase subunit beta-1       | ATP1B1   | Cell surface protein | In<br>0&16&16hr(+)<br>Ch | 44  | 124,00 | 88  | 94  | 1 | 0,71 | 0,76 | 1,07 |
| P54709 | Sodium/potassium-transporting ATPase subunit beta-3       | ATP1B3   | Cell surface protein | In<br>0&16&16hr(+)<br>Ch | 31  | 57,33  | 58  | 100 | 1 | 1,01 | 1,74 | 1,72 |
| O75882 | Attractin                                                 | ATRN     | Cell surface protein | In<br>0&16&16hr(+)<br>Ch | 55  | 178,67 | 22  | 92  | 1 | 0,12 | 0,51 | 4,18 |
| P50895 | Basal cell adhesion molecule                              | BCAM     | Cell surface protein | In<br>0&16&16hr(+)<br>Ch | 101 | 322,67 | 170 | 188 | 1 | 0,53 | 0,58 | 1,11 |
| P35613 | Basigin                                                   | BSG      | Cell surface protein | In<br>0&16&16hr(+)<br>Ch | 73  | 796,00 | 584 | 528 | 1 | 0,73 | 0,66 | 0,90 |
| Q10589 | Bone marrow stromal antigen 2                             | BST2     | Cell surface protein | In<br>0&16&16hr(+)<br>Ch | 12  | 21,33  | 4   | 32  | 1 | 0,19 | 1,50 | 8,00 |
| Q7KYR7 | Butyrophilin subfamily 2 member A1                        | BTN2A1   | Cell surface protein | In<br>0&16&16hr(+)<br>Ch | 41  | 137,33 | 65  | 57  | 1 | 0,47 | 0,42 | 0,88 |
| P54289 | Voltage-dependent calcium channel subunit alpha-2/delta-1 | CACNA2D1 | Cell surface protein | In<br>0&16&16hr(+)<br>Ch | 90  | 177,33 | 141 | 136 | 1 | 0,80 | 0,77 | 0,96 |
| Q9BY67 | Cell adhesion molecule 1                                  | CADM1    | Cell surface protein | In<br>0&16&16hr(+)<br>Ch | 25  | 70,67  | 29  | 50  | 1 | 0,41 | 0,71 | 1,72 |
| Q8NFZ8 | Cell adhesion molecule 4                                  | CADM4    | Cell surface protein | In<br>0&16&16hr(+)<br>Ch | 18  | 38,67  | 11  | 22  | 1 | 0,28 | 0,57 | 2,00 |
| Q03135 | Caveolin-1                                                | CAV1     | Cell surface protein | In<br>0&16&16hr(+)<br>Ch | 15  | 34,67  | 28  | 32  | 1 | 0,81 | 0,92 | 1,14 |
| Q6YHK3 | CD109 antigen                                             | CD109    | Cell surface protein | In<br>0&16&16hr(+)<br>Ch | 111 | 245,33 | 89  | 123 | 1 | 0,36 | 0,50 | 1,38 |
| P48509 | CD151 antigen                                             | CD151    | Cell surface protein | In<br>0&16&16hr(+)<br>Ch | 30  | 72,00  | 35  | 66  | 1 | 0,49 | 0,92 | 1,89 |
| Q5ZPR3 | CD276 antigen                                             | CD276    | Cell surface protein | In<br>0&16&16hr(+)<br>Ch | 72  | 648,00 | 491 | 451 | 1 | 0,76 | 0,70 | 0,92 |
| P15529 | Membrane cofactor protein                                 | CD46     | Cell surface protein | In<br>0&16&16hr(+)<br>Ch | 41  | 380,00 | 116 | 153 | 1 | 0,31 | 0,40 | 1,32 |
| Q08722 | Leukocyte surface antigen CD47                            | CD47     | Cell surface protein | In<br>0&16&16hr(+)<br>Ch | 20  | 32,00  | 101 | 67  | 1 | 3,16 | 2,09 | 0,66 |
| P19256 | Lymphocyte function-associated antigen 3                  | CD58     | Cell surface protein | In<br>0&16&16hr(+)<br>Ch | 9   | 24,00  | 20  | 20  | 1 | 0,83 | 0,83 | 1,00 |

|        |                                                                         |        |                      |                          |     |         |     |     |   |      |      |      |
|--------|-------------------------------------------------------------------------|--------|----------------------|--------------------------|-----|---------|-----|-----|---|------|------|------|
| P48960 | CD97 antigen                                                            | CD97   | Cell surface protein | In<br>0&16&16hr(+)<br>Ch | 138 | 745,33  | 331 | 385 | 1 | 0,44 | 0,52 | 1,16 |
| P19022 | Cadherin-2                                                              | CDH2   | Cell surface protein | In<br>0&16&16hr(+)<br>Ch | 81  | 214,67  | 110 | 111 | 1 | 0,51 | 0,52 | 1,01 |
| P33151 | Cadherin-5                                                              | CDH5   | Cell surface protein | In<br>0&16&16hr(+)<br>Ch | 57  | 193,33  | 98  | 92  | 1 | 0,51 | 0,48 | 0,94 |
| Q9NYQ6 | Cadherin EGF LAG seven-pass G-type receptor 1                           | CELSR1 | Cell surface protein | In<br>0&16&16hr(+)<br>Ch | 62  | 202,67  | 42  | 30  | 1 | 0,21 | 0,15 | 0,71 |
| Q9H8M5 | Metal transporter CNNM2                                                 | CNNM2  | Cell surface protein | In<br>0&16&16hr(+)<br>Ch | 79  | 138,67  | 69  | 62  | 1 | 0,50 | 0,45 | 0,90 |
| Q8NE01 | Metal transporter CNNM3                                                 | CNNM3  | Cell surface protein | In<br>0&16&16hr(+)<br>Ch | 93  | 149,33  | 108 | 97  | 1 | 0,72 | 0,65 | 0,90 |
| Q6P4Q7 | Metal transporter CNNM4                                                 | CNNM4  | Cell surface protein | In<br>0&16&16hr(+)<br>Ch | 92  | 122,67  | 116 | 105 | 1 | 0,95 | 0,86 | 0,91 |
| O75131 | Copine-3                                                                | CPNE3  | Cell surface protein | In<br>0&16&16hr(+)<br>Ch | 12  | 13,33   | 9   | 12  | 1 | 0,68 | 0,90 | 1,33 |
| P15509 | Granulocyte-macrophage colony stimulating factor receptor subunit alpha | CSF2RA | Cell surface protein | In<br>0&16&16hr(+)<br>Ch | 15  | 65,33   | 10  | 16  | 1 | 0,15 | 0,24 | 1,60 |
| Q6UVK1 | Chondroitin sulfate proteoglycan 4                                      | CSPG4  | Cell surface protein | In<br>0&16&16hr(+)<br>Ch | 388 | 1629,33 | 818 | 853 | 1 | 0,50 | 0,52 | 1,04 |
| P35221 | Catenin alpha-1                                                         | CTNNA1 | Cell surface protein | In<br>0&16&16hr(+)<br>Ch | 24  | 45,33   | 10  | 15  | 1 | 0,22 | 0,33 | 1,50 |
| P61073 | C-X-C chemokine receptor type 4                                         | CXCR4  | Cell surface protein | In<br>0&16&16hr(+)<br>Ch | 47  | 118,67  | 38  | 98  | 1 | 0,32 | 0,83 | 2,58 |
| Q14118 | Dystroglycan                                                            | DAG1   | Cell surface protein | In<br>0&16&16hr(+)<br>Ch | 64  | 378,67  | 158 | 227 | 1 | 0,42 | 0,60 | 1,44 |
| Q02487 | Desmocollin-2                                                           | DSC2   | Cell surface protein | In<br>0&16&16hr(+)<br>Ch | 23  | 46,67   | 21  | 25  | 1 | 0,45 | 0,54 | 1,19 |
| P42892 | Endothelin-converting enzyme 1                                          | ECE1   | Cell surface protein | In<br>0&16&16hr(+)<br>Ch | 107 | 496,00  | 306 | 290 | 1 | 0,62 | 0,58 | 0,95 |
| O95672 | Endothelin-converting enzyme-like 1                                     | ECEL1  | Cell surface protein | In<br>0&16&16hr(+)<br>Ch | 23  | 54,67   | 6   | 19  | 1 | 0,11 | 0,35 | 3,17 |
| O43854 | EGF-like repeat and discoidin I-like domain-containing protein 3        | EDIL3  | Cell surface protein | In<br>0&16&16hr(+)<br>Ch | 39  | 106,67  | 24  | 45  | 1 | 0,23 | 0,42 | 1,88 |

|        |                                                          |        |                      |                          |     |         |     |     |   |      |      |       |
|--------|----------------------------------------------------------|--------|----------------------|--------------------------|-----|---------|-----|-----|---|------|------|-------|
| P17813 | Endoglin                                                 | ENG    | Cell surface protein | In<br>0&16&16hr(+)<br>Ch | 111 | 412,00  | 137 | 240 | 1 | 0,33 | 0,58 | 1,75  |
| P29317 | Ephrin type-A receptor 2                                 | EPHA2  | Cell surface protein | In<br>0&16&16hr(+)<br>Ch | 69  | 194,67  | 8   | 91  | 1 | 0,04 | 0,47 | 11,38 |
| P29323 | Ephrin type-B receptor 2                                 | EPHB2  | Cell surface protein | In<br>0&16&16hr(+)<br>Ch | 24  | 29,33   | 21  | 13  | 1 | 0,72 | 0,44 | 0,62  |
| P54760 | Ephrin type-B receptor 4                                 | EPHB4  | Cell surface protein | In<br>0&16&16hr(+)<br>Ch | 134 | 378,67  | 222 | 196 | 1 | 0,59 | 0,52 | 0,88  |
| P04626 | Receptor tyrosine-protein kinase erbB-2                  | ERBB2  | Cell surface protein | In<br>0&16&16hr(+)<br>Ch | 63  | 148,00  | 85  | 81  | 1 | 0,57 | 0,55 | 0,95  |
| P19440 | Gamma-glutamyltranspeptidase 1                           | GGT1   | Cell surface protein | In<br>0&16&16hr(+)<br>Ch | 25  | 38,67   | 28  | 23  | 1 | 0,72 | 0,59 | 0,82  |
| Q92896 | Golgi apparatus protein 1                                | GLG1   | Cell surface protein | In<br>0&16&16hr(+)<br>Ch | 62  | 237,33  | 12  | 52  | 1 | 0,05 | 0,22 | 4,33  |
| P35052 | Glypican-1                                               | GPC1   | Cell surface protein | In<br>0&16&16hr(+)<br>Ch | 47  | 126,67  | 82  | 72  | 1 | 0,65 | 0,57 | 0,88  |
| Q8NFJ5 | Retinoic acid-induced protein 3                          | GPRC5A | Cell surface protein | In<br>0&16&16hr(+)<br>Ch | 40  | 42,67   | 58  | 91  | 1 | 1,36 | 2,13 | 1,57  |
| Q9ULI3 | Protein HEG homolog 1                                    | HEG1   | Cell surface protein | In<br>0&16&16hr(+)<br>Ch | 26  | 96,00   | 12  | 28  | 1 | 0,13 | 0,29 | 2,33  |
| P01891 | HLA class I histocompatibility antigen, A-68 alpha chain | HLA-A  | Cell surface protein | In<br>0&16&16hr(+)<br>Ch | 16  | 38,67   | 12  | 8   | 1 | 0,31 | 0,21 | 0,67  |
| P05362 | Intercellular adhesion molecule 1                        | ICAM1  | Cell surface protein | In<br>0&16&16hr(+)<br>Ch | 186 | 1037,33 | 740 | 754 | 1 | 0,71 | 0,73 | 1,02  |
| P08069 | Insulin-like growth factor 1 receptor                    | IGF1R  | Cell surface protein | In<br>0&16&16hr(+)<br>Ch | 224 | 796,00  | 449 | 436 | 1 | 0,56 | 0,55 | 0,97  |
| P11717 | Cation-independent mannose-6-phosphate receptor          | IGF2R  | Cell surface protein | In<br>0&16&16hr(+)<br>Ch | 438 | 2164,00 | 289 | 881 | 1 | 0,13 | 0,41 | 3,05  |
| Q969P0 | Immunoglobulin superfamily member 8                      | IGSF8  | Cell surface protein | In<br>0&16&16hr(+)<br>Ch | 33  | 158,67  | 24  | 44  | 1 | 0,15 | 0,28 | 1,83  |
| Q16891 | MICOS complex subunit MIC60                              | IMMT   | Cell surface protein | In<br>0&16&16hr(+)<br>Ch | 24  | 21,33   | 14  | 14  | 1 | 0,66 | 0,66 | 1,00  |
| P06213 | Insulin receptor                                         | INSR   | Cell surface protein | In<br>0&16&16hr(+)<br>Ch | 217 | 738,67  | 413 | 369 | 1 | 0,56 | 0,50 | 0,89  |

|        |                                                |           |                      |                    |     |         |     |     |   |      |      |      |
|--------|------------------------------------------------|-----------|----------------------|--------------------|-----|---------|-----|-----|---|------|------|------|
| Q8TB96 | T-cell immunomodulatory protein                | ITFG1     | Cell surface protein | In 0&16&16hr(+) Ch | 23  | 53,33   | 18  | 38  | 1 | 0,34 | 0,71 | 2,11 |
| Q9H0X4 | Protein ITFG3                                  | ITFG3     | Cell surface protein | In 0&16&16hr(+) Ch | 42  | 140,00  | 60  | 62  | 1 | 0,43 | 0,44 | 1,03 |
| P56199 | Integrin alpha-1                               | ITGA1     | Cell surface protein | In 0&16&16hr(+) Ch | 124 | 417,33  | 214 | 215 | 1 | 0,51 | 0,52 | 1,00 |
| P26006 | Integrin alpha-3                               | ITGA3     | Cell surface protein | In 0&16&16hr(+) Ch | 82  | 285,33  | 220 | 195 | 1 | 0,77 | 0,68 | 0,89 |
| P23229 | Integrin alpha-6                               | ITGA6     | Cell surface protein | In 0&16&16hr(+) Ch | 117 | 349,33  | 204 | 159 | 1 | 0,58 | 0,46 | 0,78 |
| P06756 | Integrin alpha-V                               | ITGAV     | Cell surface protein | In 0&16&16hr(+) Ch | 248 | 977,33  | 497 | 511 | 1 | 0,51 | 0,52 | 1,03 |
| P16144 | Integrin beta-4                                | ITGB4     | Cell surface protein | In 0&16&16hr(+) Ch | 136 | 353,33  | 192 | 157 | 1 | 0,54 | 0,44 | 0,82 |
| P18084 | Integrin beta-5                                | ITGB5     | Cell surface protein | In 0&16&16hr(+) Ch | 105 | 341,33  | 144 | 155 | 1 | 0,42 | 0,45 | 1,08 |
| P26012 | Integrin beta-8                                | ITGB8     | Cell surface protein | In 0&16&16hr(+) Ch | 26  | 66,67   | 19  | 22  | 1 | 0,29 | 0,33 | 1,16 |
| P14923 | Junction plakoglobin                           | JUP       | Cell surface protein | In 0&16&16hr(+) Ch | 162 | 540,00  | 352 | 433 | 1 | 0,65 | 0,80 | 1,23 |
| Q6NSJ0 | Uncharacterized family 31 glucosidase KIAA1161 | KIAA1161  | Cell surface protein | In 0&16&16hr(+) Ch | 40  | 72,00   | 29  | 44  | 1 | 0,40 | 0,61 | 1,52 |
| Q9HCM3 | UPF0606 protein KIAA1549                       | KIAA1549  | Cell surface protein | In 0&16&16hr(+) Ch | 70  | 157,33  | 53  | 73  | 1 | 0,34 | 0,46 | 1,38 |
| Q9ULH0 | Kinase D-interacting substrate of 220 kDa      | KIDINS220 | Cell surface protein | In 0&16&16hr(+) Ch | 46  | 80,00   | 13  | 40  | 1 | 0,16 | 0,50 | 3,08 |
| Q96J84 | Kin of IRRE-like protein 1                     | KIRREL    | Cell surface protein | In 0&16&16hr(+) Ch | 47  | 182,67  | 16  | 50  | 1 | 0,09 | 0,27 | 3,13 |
| P32004 | Neural cell adhesion molecule L1               | L1CAM     | Cell surface protein | In 0&16&16hr(+) Ch | 235 | 1329,33 | 683 | 731 | 1 | 0,51 | 0,55 | 1,07 |
| O15230 | Laminin subunit alpha-5                        | LAMA5     | Cell surface protein | In 0&16&16hr(+) Ch | 169 | 774,67  | 18  | 92  | 1 | 0,02 | 0,12 | 5,11 |
| P11047 | Laminin subunit gamma-1                        | LAMC1     | Cell surface protein | In 0&16&16hr(+) Ch | 55  | 222,67  | 12  | 28  | 1 | 0,05 | 0,13 | 2,33 |



|        |                                                                          |         |                      |                    |     |        |      |      |   |      |      |      |
|--------|--------------------------------------------------------------------------|---------|----------------------|--------------------|-----|--------|------|------|---|------|------|------|
| P11279 | Lysosome-associated membrane glycoprotein 1                              | LAMP1   | Cell surface protein | In 0&16&16hr(+) Ch | 19  | 40,00  | 23   | 40   | 1 | 0,58 | 1,00 | 1,74 |
| Q9P244 | Leucine-rich repeat and fibronectin type III domain-containing protein 1 | LRFN1   | Cell surface protein | In 0&16&16hr(+) Ch | 23  | 46,67  | 11   | 12   | 1 | 0,24 | 0,26 | 1,09 |
| Q6PJG9 | Leucine-rich repeat and fibronectin type-III domain-containing protein 4 | LRFN4   | Cell surface protein | In 0&16&16hr(+) Ch | 26  | 61,33  | 12   | 22   | 1 | 0,20 | 0,36 | 1,83 |
| Q07954 | Prolow-density lipoprotein receptor-related protein 1                    | LRP1    | Cell surface protein | In 0&16&16hr(+) Ch | 103 | 502,67 | 27   | 11   | 1 | 0,05 | 0,02 | 0,41 |
| B7ZLD0 | LRP6 protein                                                             | LRP6    | Cell surface protein | In 0&16&16hr(+) Ch | 38  | 152,00 | 14   | 12   | 1 | 0,09 | 0,08 | 0,86 |
| Q8IWT6 | Volume-regulated anion channel subunit LRRC8A                            | LRRC8A  | Cell surface protein | In 0&16&16hr(+) Ch | 207 | 461,33 | 302  | 313  | 1 | 0,65 | 0,68 | 1,04 |
| Q8TDW0 | Volume-regulated anion channel subunit LRRC8C                            | LRRC8C  | Cell surface protein | In 0&16&16hr(+) Ch | 49  | 57,33  | 35   | 47   | 1 | 0,61 | 0,82 | 1,34 |
| Q7L1W4 | Volume-regulated anion channel subunit LRRC8D                            | LRRC8D  | Cell surface protein | In 0&16&16hr(+) Ch | 93  | 93,33  | 86   | 76   | 1 | 0,92 | 0,81 | 0,88 |
| Q6NSJ5 | Volume-regulated anion channel subunit LRRC8E                            | LRRC8E  | Cell surface protein | In 0&16&16hr(+) Ch | 92  | 137,33 | 86   | 85   | 1 | 0,63 | 0,62 | 0,99 |
| P43121 | Cell surface glycoprotein MUC18                                          | MCAM    | Cell surface protein | In 0&16&16hr(+) Ch | 259 | 858,67 | 1395 | 1576 | 1 | 1,62 | 1,84 | 1,13 |
| Q9H1U4 | Multiple epidermal growth factor-like domains protein 9                  | MEGF9   | Cell surface protein | In 0&16&16hr(+) Ch | 23  | 74,67  | 14   | 22   | 1 | 0,19 | 0,29 | 1,57 |
| P08582 | Melanotransferrin                                                        | MFI2    | Cell surface protein | In 0&16&16hr(+) Ch | 14  | 5,33   | 10   | 13   | 1 | 1,88 | 2,44 | 1,30 |
| O60291 | E3 ubiquitin-protein ligase MGRN1                                        | MGRN1   | Cell surface protein | In 0&16&16hr(+) Ch | 18  | 60,00  | 11   | 32   | 1 | 0,18 | 0,53 | 2,91 |
| P15941 | Mucin-1                                                                  | MUC1    | Cell surface protein | In 0&16&16hr(+) Ch | 6   | 20,00  | 17   | 21   | 1 | 0,85 | 1,05 | 1,24 |
| Q68D85 | Natural cytotoxicity triggering receptor 3 ligand 1                      | NCR3LG1 | Cell surface protein | In 0&16&16hr(+) Ch | 35  | 106,67 | 29   | 32   | 1 | 0,27 | 0,30 | 1,10 |
| Q92542 | Nicastrin                                                                | NCSTN   | Cell surface protein | In 0&16&16hr(+) Ch | 71  | 282,67 | 206  | 226  | 1 | 0,73 | 0,80 | 1,10 |
| Q92859 | Neogenin                                                                 | NEO1    | Cell surface protein | In 0&16&16hr(+) Ch | 29  | 92,00  | 3    | 15   | 1 | 0,03 | 0,16 | 5,00 |

|        |                                                     |        |                      |                    |     |         |     |     |   |      |      |      |
|--------|-----------------------------------------------------|--------|----------------------|--------------------|-----|---------|-----|-----|---|------|------|------|
| Q04721 | Neurogenic locus notch homolog protein 2            | NOTCH2 | Cell surface protein | In 0&16&16hr(+) Ch | 112 | 466,67  | 40  | 95  | 1 | 0,09 | 0,20 | 2,38 |
| P16066 | Atrial natriuretic peptide receptor 1               | NPR1   | Cell surface protein | In 0&16&16hr(+) Ch | 58  | 121,33  | 42  | 40  | 1 | 0,35 | 0,33 | 0,95 |
| P17342 | Atrial natriuretic peptide receptor 3               | NPR3   | Cell surface protein | In 0&16&16hr(+) Ch | 27  | 105,33  | 15  | 20  | 1 | 0,14 | 0,19 | 1,33 |
| Q9Y639 | Neuroplastin                                        | NPTN   | Cell surface protein | In 0&16&16hr(+) Ch | 50  | 165,33  | 156 | 126 | 1 | 0,94 | 0,76 | 0,81 |
| Q92823 | Neuronal cell adhesion molecule                     | NRCAM  | Cell surface protein | In 0&16&16hr(+) Ch | 22  | 42,67   | 10  | 6   | 1 | 0,23 | 0,14 | 0,60 |
| O14786 | Neuropilin-1                                        | NRP1   | Cell surface protein | In 0&16&16hr(+) Ch | 70  | 277,33  | 27  | 33  | 1 | 0,10 | 0,12 | 1,22 |
| O60245 | Protocadherin-7                                     | PCDH7  | Cell surface protein | In 0&16&16hr(+) Ch | 116 | 384,00  | 177 | 194 | 1 | 0,46 | 0,51 | 1,10 |
| O00541 | Pescadillo homolog                                  | PES1   | Cell surface protein | In 0&16&16hr(+) Ch | 12  | 20,00   | 8   | 6   | 1 | 0,40 | 0,30 | 0,75 |
| Q92508 | Piezo-type mechanosensitive ion channel component 1 | PIEZO1 | Cell surface protein | In 0&16&16hr(+) Ch | 83  | 196,00  | 149 | 147 | 1 | 0,76 | 0,75 | 0,99 |
| Q9H5I5 | Piezo-type mechanosensitive ion channel component 2 | PIEZO2 | Cell surface protein | In 0&16&16hr(+) Ch | 47  | 50,67   | 32  | 47  | 1 | 0,63 | 0,93 | 1,47 |
| Q9UIW2 | Plexin-A1                                           | PLXNA1 | Cell surface protein | In 0&16&16hr(+) Ch | 182 | 690,67  | 323 | 268 | 1 | 0,47 | 0,39 | 0,83 |
| O75051 | Plexin-A2                                           | PLXNA2 | Cell surface protein | In 0&16&16hr(+) Ch | 14  | 25,33   | 8   | 5   | 1 | 0,32 | 0,20 | 0,63 |
| O43157 | Plexin-B1                                           | PLXNB1 | Cell surface protein | In 0&16&16hr(+) Ch | 100 | 189,33  | 129 | 108 | 1 | 0,68 | 0,57 | 0,84 |
| O15031 | Plexin-B2                                           | PLXNB2 | Cell surface protein | In 0&16&16hr(+) Ch | 290 | 1450,67 | 677 | 578 | 1 | 0,47 | 0,40 | 0,85 |
| Q9Y4D7 | Plexin-D1                                           | PLXND1 | Cell surface protein | In 0&16&16hr(+) Ch | 86  | 284,00  | 117 | 102 | 1 | 0,41 | 0,36 | 0,87 |
| P0CW18 | Serine protease 56                                  | PRSS56 | Cell surface protein | In 0&16&16hr(+) Ch | 25  | 80,00   | 19  | 15  | 1 | 0,24 | 0,19 | 0,79 |
| Q9P2B2 | Prostaglandin F2 receptor negative regulator        | PTGFRN | Cell surface protein | In 0&16&16hr(+) Ch | 58  | 173,33  | 103 | 119 | 1 | 0,59 | 0,69 | 1,16 |

|            |                                                            |         |                      |                    |     |         |     |     |   |      |      |      |
|------------|------------------------------------------------------------|---------|----------------------|--------------------|-----|---------|-----|-----|---|------|------|------|
| Q13308     | Inactive tyrosine-protein kinase 7                         | PTK7    | Cell surface protein | In 0&16&16hr(+) Ch | 29  | 41,33   | 22  | 17  | 1 | 0,53 | 0,41 | 0,77 |
| Q9P035     | Very-long-chain (3R)-3-hydroxyacyl-CoA dehydratase 3       | PTPLAD1 | Cell surface protein | In 0&16&16hr(+) Ch | 16  | 26,67   | 8   | 9   | 1 | 0,30 | 0,34 | 1,13 |
| P18433     | Receptor-type tyrosine-protein phosphatase alpha           | PTPRA   | Cell surface protein | In 0&16&16hr(+) Ch | 87  | 254,67  | 166 | 121 | 1 | 0,65 | 0,48 | 0,73 |
| P23470     | Receptor-type tyrosine-protein phosphatase gamma           | PTPRG   | Cell surface protein | In 0&16&16hr(+) Ch | 88  | 298,67  | 116 | 98  | 1 | 0,39 | 0,33 | 0,84 |
| Q12913     | Receptor-type tyrosine-protein phosphatase eta             | PTPRJ   | Cell surface protein | In 0&16&16hr(+) Ch | 110 | 406,67  | 162 | 178 | 1 | 0,40 | 0,44 | 1,10 |
| E9PGC5     | Receptor-type tyrosine-protein phosphatase kappa           | PTPRK   | Cell surface protein | In 0&16&16hr(+) Ch | 54  | 208,00  | 32  | 36  | 1 | 0,15 | 0,17 | 1,13 |
| P15151     | Poliovirus receptor                                        | PVR     | Cell surface protein | In 0&16&16hr(+) Ch | 67  | 492,00  | 312 | 263 | 1 | 0,63 | 0,53 | 0,84 |
| Q92692     | Nectin-2                                                   | PVRL2   | Cell surface protein | In 0&16&16hr(+) Ch | 29  | 89,33   | 42  | 60  | 1 | 0,47 | 0,67 | 1,43 |
| Q9NQS3     | Nectin-3                                                   | PVRL3   | Cell surface protein | In 0&16&16hr(+) Ch | 23  | 45,33   | 8   | 14  | 1 | 0,18 | 0,31 | 1,75 |
| Q9Y6N7     | Roundabout homolog 1                                       | ROBO1   | Cell surface protein | In 0&16&16hr(+) Ch | 255 | 1214,67 | 627 | 408 | 1 | 0,52 | 0,34 | 0,65 |
| Q01974     | Tyrosine-protein kinase transmembrane receptor ROR2        | ROR2    | Cell surface protein | In 0&16&16hr(+) Ch | 91  | 258,67  | 143 | 128 | 1 | 0,55 | 0,49 | 0,90 |
| Q86UN3     | Reticulon-4 receptor-like 2                                | RTN4RL2 | Cell surface protein | In 0&16&16hr(+) Ch | 28  | 106,67  | 32  | 42  | 1 | 0,30 | 0,39 | 1,31 |
| A0A024RBS4 | Scavenger receptor class B, member 1, isoform CRA_b        | SCARB1  | Cell surface protein | In 0&16&16hr(+) Ch | 52  | 272,00  | 101 | 61  | 1 | 0,37 | 0,22 | 0,60 |
| P78324     | Tyrosine-protein phosphatase non-receptor type substrate 1 | SIRPA   | Cell surface protein | In 0&16&16hr(+) Ch | 16  | 52,00   | 9   | 19  | 1 | 0,17 | 0,37 | 2,11 |
| P55011     | Solute carrier family 12 member 2                          | SLC12A2 | Cell surface protein | In 0&16&16hr(+) Ch | 74  | 60,00   | 99  | 88  | 1 | 1,65 | 1,47 | 0,89 |
| Q9Y666     | Solute carrier family 12 member 7                          | SLC12A7 | Cell surface protein | In 0&16&16hr(+) Ch | 162 | 285,33  | 400 | 340 | 1 | 1,40 | 1,19 | 0,85 |
| Q99808     | Equilibrative nucleoside transporter 1                     | SLC29A1 | Cell surface protein | In 0&16&16hr(+) Ch | 12  | 10,67   | 17  | 19  | 1 | 1,59 | 1,78 | 1,12 |

|            |                                                                   |          |                      |                          |     |        |     |     |   |      |      |      |
|------------|-------------------------------------------------------------------|----------|----------------------|--------------------------|-----|--------|-----|-----|---|------|------|------|
| P11169     | Solute carrier family 2, facilitated glucose transporter member 3 | SLC2A3   | Cell surface protein | In<br>0&16&16hr(+)<br>Ch | 29  | 45,33  | 47  | 58  | 1 | 1,04 | 1,28 | 1,23 |
| Q9Y6M5     | Zinc transporter 1                                                | SLC30A1  | Cell surface protein | In<br>0&16&16hr(+)<br>Ch | 90  | 113,33 | 159 | 141 | 1 | 1,40 | 1,24 | 0,89 |
| Q9H2H9     | Sodium-coupled neutral amino acid transporter 1                   | SLC38A1  | Cell surface protein | In<br>0&16&16hr(+)<br>Ch | 65  | 130,67 | 87  | 148 | 1 | 0,67 | 1,13 | 1,70 |
| Q9ULF5     | Zinc transporter ZIP10                                            | SLC39A10 | Cell surface protein | In<br>0&16&16hr(+)<br>Ch | 31  | 160,00 | 40  | 37  | 1 | 0,25 | 0,23 | 0,93 |
| Q15043     | Zinc transporter ZIP14                                            | SLC39A14 | Cell surface protein | In<br>0&16&16hr(+)<br>Ch | 45  | 201,33 | 75  | 123 | 1 | 0,37 | 0,61 | 1,64 |
| Q13433     | Zinc transporter ZIP6                                             | SLC39A6  | Cell surface protein | In<br>0&16&16hr(+)<br>Ch | 31  | 85,33  | 32  | 29  | 1 | 0,38 | 0,34 | 0,91 |
| A0A024R798 | Solute carrier family 44, member 2, isoform CRA_b                 | SLC44A2  | Cell surface protein | In<br>0&16&16hr(+)<br>Ch | 43  | 92,00  | 49  | 52  | 1 | 0,53 | 0,57 | 1,06 |
| P04920     | Anion exchange protein 2                                          | SLC4A2   | Cell surface protein | In<br>0&16&16hr(+)<br>Ch | 108 | 238,67 | 155 | 251 | 1 | 0,65 | 1,05 | 1,62 |
| B5M450     | Solute carrier family 4 sodium bicarbonate cotransporter member 7 | SLC4A7   | Cell surface protein | In<br>0&16&16hr(+)<br>Ch | 32  | 41,33  | 41  | 34  | 1 | 0,99 | 0,82 | 0,83 |
| P31641     | Sodium- and chloride-dependent taurine transporter                | SLC6A6   | Cell surface protein | In<br>0&16&16hr(+)<br>Ch | 42  | 53,33  | 40  | 74  | 1 | 0,75 | 1,39 | 1,85 |
| P48067     | Sodium- and chloride-dependent glycine transporter 1              | SLC6A9   | Cell surface protein | In<br>0&16&16hr(+)<br>Ch | 12  | 9,33   | 15  | 14  | 1 | 1,61 | 1,50 | 0,93 |
| P30825     | High affinity cationic amino acid transporter 1                   | SLC7A1   | Cell surface protein | In<br>0&16&16hr(+)<br>Ch | 10  | 5,33   | 6   | 17  | 1 | 1,13 | 3,19 | 2,83 |
| Q9UPY5     | Cystine/glutamate transporter                                     | SLC7A11  | Cell surface protein | In<br>0&16&16hr(+)<br>Ch | 40  | 92,00  | 52  | 73  | 1 | 0,57 | 0,79 | 1,40 |
| Q92536     | Y+L amino acid transporter 2                                      | SLC7A6   | Cell surface protein | In<br>0&16&16hr(+)<br>Ch | 28  | 44,00  | 28  | 44  | 1 | 0,64 | 1,00 | 1,57 |
| Q92485     | Acid sphingomyelinase-like phosphodiesterase 3b                   | SMPDL3B  | Cell surface protein | In<br>0&16&16hr(+)<br>Ch | 22  | 74,67  | 36  | 46  | 1 | 0,48 | 0,62 | 1,28 |
| Q96PQ0     | VPS10 domain-containing receptor SorCS2                           | SORCS2   | Cell surface protein | In<br>0&16&16hr(+)<br>Ch | 50  | 102,67 | 25  | 51  | 1 | 0,24 | 0,50 | 2,04 |
| Q13501     | Sequestosome-1                                                    | SQSTM1   | Cell surface protein | In<br>0&16&16hr(+)<br>Ch | 12  | 14,67  | 16  | 14  | 1 | 1,09 | 0,95 | 0,88 |

|        |                                                    |         |                      |                    |     |        |     |     |   |      |      |       |
|--------|----------------------------------------------------|---------|----------------------|--------------------|-----|--------|-----|-----|---|------|------|-------|
| Q687X5 | Metalloreductase STEAP4                            | STEAP4  | Cell surface protein | In 0&16&16hr(+) Ch | 102 | 188,00 | 232 | 215 | 1 | 1,23 | 1,14 | 0,93  |
| P27105 | Erythrocyte band 7 integral membrane protein       | STOM    | Cell surface protein | In 0&16&16hr(+) Ch | 46  | 93,33  | 21  | 74  | 1 | 0,23 | 0,79 | 3,52  |
| Q9BX79 | Stimulated by retinoic acid gene 6 protein homolog | STRA6   | Cell surface protein | In 0&16&16hr(+) Ch | 26  | 49,33  | 21  | 22  | 1 | 0,43 | 0,45 | 1,05  |
| Q9P273 | Teneurin-3                                         | TENM3   | Cell surface protein | In 0&16&16hr(+) Ch | 194 | 505,33 | 172 | 197 | 1 | 0,34 | 0,39 | 1,15  |
| P07996 | Thrombospondin-1                                   | THBS1   | Cell surface protein | In 0&16&16hr(+) Ch | 43  | 133,33 | 13  | 18  | 1 | 0,10 | 0,14 | 1,38  |
| Q9UHN6 | Transmembrane protein 2                            | TMEM2   | Cell surface protein | In 0&16&16hr(+) Ch | 233 | 898,67 | 343 | 382 | 1 | 0,38 | 0,43 | 1,11  |
| Q9NV96 | Cell cycle control protein 50A                     | TMEM30A | Cell surface protein | In 0&16&16hr(+) Ch | 13  | 12,00  | 6   | 19  | 1 | 0,50 | 1,58 | 3,17  |
| Q13641 | Trophoblast glycoprotein                           | TPBG    | Cell surface protein | In 0&16&16hr(+) Ch | 15  | 42,67  | 2   | 22  | 1 | 0,05 | 0,52 | 11,00 |
| Q6EMK4 | Vasorin                                            | VASN    | Cell surface protein | In 0&16&16hr(+) Ch | 36  | 149,33 | 42  | 61  | 1 | 0,28 | 0,41 | 1,45  |
| P04004 | Vitronectin                                        | VTN     | Cell surface protein | In 0&16&16hr(+) Ch | 17  | 33,33  | 30  | 24  | 1 | 0,90 | 0,72 | 0,80  |
| Q9NRU3 | Metal transporter CNNM1                            | CNNM1   | Cell surface protein | In 0&16hr          | 4   | 4,00   | 8   |     | 1 | 2,00 | 0,00 | 0,00  |
| Q7L8L6 | FAST kinase domain-containing protein 5            | FASTKD5 | Cell surface protein | In 0&16hr          | 6   | 8,00   | 6   |     | 1 | 0,75 | 0,00 | 0,00  |
| Q9NPH3 | Interleukin-1 receptor accessory protein           | IL1RAP  | Cell surface protein | In 0&16hr          | 20  | 54,67  | 9   |     | 1 | 0,16 | 0,00 | 0,00  |
| Q9UBG0 | C-type mannose receptor 2                          | MRC2    | Cell surface protein | In 0&16hr          | 31  | 101,33 | 23  |     | 1 | 0,23 | 0,00 | 0,00  |
| Q969V3 | Nicalin                                            | NCLN    | Cell surface protein | In 0&16hr          | 9   | 29,33  | 12  |     | 1 | 0,41 | 0,00 | 0,00  |
| O75691 | Small subunit processome component 20 homolog      | UTP20   | Cell surface protein | In 0&16hr          | 11  | 24,00  | 4   |     | 1 | 0,17 | 0,00 | 0,00  |
| Q9NP58 | ATP-binding cassette sub-family B member 6         | ABCB6   | Cell surface protein | In 0&16hr(+)Ch     | 11  | 6,67   |     | 17  | 1 | 0,00 | 2,55 |       |

|        |                                                             |        |                      |                       |    |        |  |     |   |      |      |  |
|--------|-------------------------------------------------------------|--------|----------------------|-----------------------|----|--------|--|-----|---|------|------|--|
| Q9NPF0 | CD320 antigen                                               | CD320  | Cell surface protein | In<br>0&16hr(+)<br>Ch | 5  | 26,67  |  | 9   | 1 | 0,00 | 0,34 |  |
| O75976 | Carboxypeptidase D                                          | CPD    | Cell surface protein | In<br>0&16hr(+)<br>Ch | 34 | 88,00  |  | 22  | 1 | 0,00 | 0,25 |  |
| P14384 | Carboxypeptidase M                                          | CPM    | Cell surface protein | In<br>0&16hr(+)<br>Ch | 4  | 9,33   |  | 5   | 1 | 0,00 | 0,54 |  |
| Q16832 | Discoidin domain-containing receptor 2                      | DDR2   | Cell surface protein | In<br>0&16hr(+)<br>Ch | 23 | 102,67 |  | 7   | 1 | 0,00 | 0,07 |  |
| Q14574 | Desmocollin-3                                               | DSC3   | Cell surface protein | In<br>0&16hr(+)<br>Ch | 10 | 33,33  |  | 4   | 1 | 0,00 | 0,12 |  |
| Q9BSJ8 | Extended synaptotagmin-1                                    | ESYT1  | Cell surface protein | In<br>0&16hr(+)<br>Ch | 5  | 4,00   |  | 4   | 1 | 0,00 | 1,00 |  |
| Q14517 | Protocadherin Fat 1                                         | FAT1   | Cell surface protein | In<br>0&16hr(+)<br>Ch | 77 | 258,67 |  | 17  | 1 | 0,00 | 0,07 |  |
| P15586 | N-acetylglucosamine-6-sulfatase                             | GNS    | Cell surface protein | In<br>0&16hr(+)<br>Ch | 12 | 28,00  |  | 10  | 1 | 0,00 | 0,36 |  |
| Q9Y653 | G-protein coupled receptor 56                               | GPR56  | Cell surface protein | In<br>0&16hr(+)<br>Ch | 12 | 28,00  |  | 8   | 1 | 0,00 | 0,29 |  |
| O75144 | ICOS ligand                                                 | ICOSLG | Cell surface protein | In<br>0&16hr(+)<br>Ch | 5  | 12,00  |  | 5   | 1 | 0,00 | 0,42 |  |
| O75054 | Immunoglobulin superfamily member 3                         | IGSF3  | Cell surface protein | In<br>0&16hr(+)<br>Ch | 21 | 52,00  |  | 11  | 1 | 0,00 | 0,21 |  |
| Q96J02 | E3 ubiquitin-protein ligase Itchy homolog                   | ITCH   | Cell surface protein | In<br>0&16hr(+)<br>Ch | 9  | 6,67   |  | 13  | 1 | 0,00 | 1,95 |  |
| P07942 | Laminin subunit beta-1                                      | LAMB1  | Cell surface protein | In<br>0&16hr(+)<br>Ch | 40 | 169,33 |  | 17  | 1 | 0,00 | 0,10 |  |
| P01130 | Low-density lipoprotein receptor                            | LDLR   | Cell surface protein | In<br>0&16hr(+)<br>Ch | 61 | 185,33 |  | 185 | 1 | 0,00 | 1,00 |  |
| Q9BXB1 | Leucine-rich repeat-containing G-protein coupled receptor 4 | LGR4   | Cell surface protein | In<br>0&16hr(+)<br>Ch | 15 | 18,67  |  | 15  | 1 | 0,00 | 0,80 |  |
| P42702 | Leukemia inhibitory factor receptor                         | LIFR   | Cell surface protein | In<br>0&16hr(+)<br>Ch | 17 | 44,00  |  | 14  | 1 | 0,00 | 0,32 |  |
| Q14114 | Low-density lipoprotein receptor-related protein 8          | LRP8   | Cell surface protein | In<br>0&16hr(+)<br>Ch | 10 | 20,00  |  | 5   | 1 | 0,00 | 0,25 |  |

|        |                                                                |          |                      |                    |    |        |  |    |   |      |      |  |
|--------|----------------------------------------------------------------|----------|----------------------|--------------------|----|--------|--|----|---|------|------|--|
| Q99650 | Oncostatin-M-specific receptor subunit beta                    | OSMR     | Cell surface protein | In 0&16hr(+)<br>Ch | 16 | 21,33  |  | 19 | 1 | 0,00 | 0,89 |  |
| Q9H6A9 | Pecanex-like protein 3                                         | PCNXL3   | Cell surface protein | In 0&16hr(+)<br>Ch | 18 | 41,33  |  | 8  | 1 | 0,00 | 0,19 |  |
| Q8IV08 | Phospholipase D3                                               | PLD3     | Cell surface protein | In 0&16hr(+)<br>Ch | 8  | 8,00   |  | 10 | 1 | 0,00 | 1,25 |  |
| O00469 | Procollagen-lysine,2-oxoglutarate 5-dioxygenase 2              | PLOD2    | Cell surface protein | In 0&16hr(+)<br>Ch | 12 | 17,33  |  | 16 | 1 | 0,00 | 0,92 |  |
| Q9NZ53 | Podocalyxin-like protein 2                                     | PODXL2   | Cell surface protein | In 0&16hr(+)<br>Ch | 4  | 13,33  |  | 2  | 1 | 0,00 | 0,15 |  |
| Q15223 | Nectin-1                                                       | PVRL1    | Cell surface protein | In 0&16hr(+)<br>Ch | 8  | 13,33  |  | 11 | 1 | 0,00 | 0,83 |  |
| Q658P3 | Metalloreductase STEAP3                                        | STEAP3   | Cell surface protein | In 0&16hr(+)<br>Ch | 5  | 5,33   |  | 6  | 1 | 0,00 | 1,13 |  |
| Q6N022 | Teneurin-4                                                     | TENM4    | Cell surface protein | In 0&16hr(+)<br>Ch | 5  | 13,33  |  | 6  | 1 | 0,00 | 0,45 |  |
| Q24JP5 | Transmembrane protein 132A                                     | TMEM132A | Cell surface protein | In 0&16hr(+)<br>Ch | 24 | 100,00 |  | 15 | 1 | 0,00 | 0,15 |  |
| P41273 | Tumor necrosis factor ligand superfamily member 9              | TNFSF9   | Cell surface protein | In 0&16hr(+)<br>Ch | 8  | 12,00  |  | 8  | 1 | 0,00 | 0,67 |  |
| Q9UBH6 | Xenotropic and polytropic retrovirus receptor 1                | XPR1     | Cell surface protein | In 0&16hr(+)<br>Ch | 15 | 29,33  |  | 13 | 1 | 0,00 | 0,44 |  |
| Q9BZC7 | ATP-binding cassette sub-family A member 2                     | ABCA2    | Cell surface protein | In 0hr             | 15 | 49,33  |  |    | 1 | 0,00 | 0,00 |  |
| P28288 | ATP-binding cassette sub-family D member 3                     | ABCD3    | Cell surface protein | In 0hr             | 5  | 10,67  |  |    | 1 | 0,00 | 0,00 |  |
| Q04771 | Activin receptor type-1                                        | ACVR1    | Cell surface protein | In 0hr             | 3  | 6,67   |  |    | 1 | 0,00 | 0,00 |  |
| O14672 | Disintegrin and metalloproteinase domain-containing protein 10 | ADAM10   | Cell surface protein | In 0hr             | 10 | 38,67  |  |    | 1 | 0,00 | 0,00 |  |
| Q13443 | Disintegrin and metalloproteinase domain-containing protein 9  | ADAM9    | Cell surface protein | In 0hr             | 13 | 42,67  |  |    | 1 | 0,00 | 0,00 |  |
| P10696 | Alkaline phosphatase, placental-like                           | ALPPL2   | Cell surface protein | In 0hr             | 2  | 10,67  |  |    | 1 | 0,00 | 0,00 |  |

|        |                                                               |         |                      |        |    |        |  |  |   |      |      |  |
|--------|---------------------------------------------------------------|---------|----------------------|--------|----|--------|--|--|---|------|------|--|
| Q9HCJ1 | Progressive ankylosis protein homolog                         | ANKH    | Cell surface protein | In Ohr | 10 | 41,33  |  |  | 1 | 0,00 | 0,00 |  |
| Q9H6X2 | Anthrax toxin receptor 1                                      | ANTXR1  | Cell surface protein | In Ohr | 6  | 21,33  |  |  | 1 | 0,00 | 0,00 |  |
| P08133 | Annexin A6                                                    | ANXA6   | Cell surface protein | In Ohr | 7  | 21,33  |  |  | 1 | 0,00 | 0,00 |  |
| O94973 | AP-2 complex subunit alpha-2                                  | AP2A2   | Cell surface protein | In Ohr | 3  | 8,00   |  |  | 1 | 0,00 | 0,00 |  |
| P30530 | Tyrosine-protein kinase receptor UFO                          | AXL     | Cell surface protein | In Ohr | 16 | 60,00  |  |  | 1 | 0,00 | 0,00 |  |
| Q9Y5Z0 | Beta-secretase 2                                              | BACE2   | Cell surface protein | In Ohr | 6  | 22,67  |  |  | 1 | 0,00 | 0,00 |  |
| Q5VU97 | VWFA and cache domain-containing protein 1                    | CACHD1  | Cell surface protein | In Ohr | 15 | 50,67  |  |  | 1 | 0,00 | 0,00 |  |
| Q9HCU4 | Cadherin EGF LAG seven-pass G-type receptor 2                 | CELSR2  | Cell surface protein | In Ohr | 20 | 86,67  |  |  | 1 | 0,00 | 0,00 |  |
| Q07065 | Cytoskeleton-associated protein 4                             | CKAP4   | Cell surface protein | In Ohr | 2  | 4,00   |  |  | 1 | 0,00 | 0,00 |  |
| Q99715 | Collagen alpha-1(XII) chain                                   | COL12A1 | Cell surface protein | In Ohr | 67 | 260,00 |  |  | 1 | 0,00 | 0,00 |  |
| Q08345 | Epithelial discoidin domain-containing receptor 1             | DDR1    | Cell surface protein | In Ohr | 6  | 12,00  |  |  | 1 | 0,00 | 0,00 |  |
| Q08554 | Desmocollin-1                                                 | DSC1    | Cell surface protein | In Ohr | 4  | 22,67  |  |  | 1 | 0,00 | 0,00 |  |
| Q9UHX3 | EGF-like module-containing mucin-like hormone receptor-like 2 | EMR2    | Cell surface protein | In Ohr | 2  | 8,00   |  |  | 1 | 0,00 | 0,00 |  |
| P54753 | Ephrin type-B receptor 3                                      | EPHB3   | Cell surface protein | In Ohr | 2  | 6,67   |  |  | 1 | 0,00 | 0,00 |  |
| Q6V0I7 | Protocadherin Fat 4                                           | FAT4    | Cell surface protein | In Ohr | 15 | 42,67  |  |  | 1 | 0,00 | 0,00 |  |
| P35555 | Fibrillin-1                                                   | FBN1    | Cell surface protein | In Ohr | 6  | 22,67  |  |  | 1 | 0,00 | 0,00 |  |
| P21802 | Fibroblast growth factor receptor 2                           | FGFR2   | Cell surface protein | In Ohr | 10 | 32,00  |  |  | 1 | 0,00 | 0,00 |  |



|        |                                                                |        |                      |        |    |       |  |  |   |      |      |  |
|--------|----------------------------------------------------------------|--------|----------------------|--------|----|-------|--|--|---|------|------|--|
| P20930 | Filaggrin                                                      | FLG    | Cell surface protein | In Ohr | 3  | 10,67 |  |  | 1 | 0,00 | 0,00 |  |
| P06241 | Tyrosine-protein kinase Fyn                                    | FYN    | Cell surface protein | In Ohr | 3  | 8,00  |  |  | 1 | 0,00 | 0,00 |  |
| Q14332 | Frizzled-2                                                     | FZD2   | Cell surface protein | In Ohr | 5  | 18,67 |  |  | 1 | 0,00 | 0,00 |  |
| Q10472 | Polypeptide N-acetylgalactosaminyltransferase 1                | GALNT1 | Cell surface protein | In Ohr | 4  | 13,33 |  |  | 1 | 0,00 | 0,00 |  |
| P16278 | Beta-galactosidase                                             | GLB1   | Cell surface protein | In Ohr | 3  | 8,00  |  |  | 1 | 0,00 | 0,00 |  |
| O00461 | Golgi integral membrane protein 4                              | GOLIM4 | Cell surface protein | In Ohr | 5  | 18,67 |  |  | 1 | 0,00 | 0,00 |  |
| Q8IWK6 | Probable G-protein coupled receptor 125                        | GPR125 | Cell surface protein | In Ohr | 8  | 22,67 |  |  | 1 | 0,00 | 0,00 |  |
| Q9UMF0 | Intercellular adhesion molecule 5                              | ICAM5  | Cell surface protein | In Ohr | 8  | 16,00 |  |  | 1 | 0,00 | 0,00 |  |
| P17181 | Interferon alpha/beta receptor 1                               | IFNAR1 | Cell surface protein | In Ohr | 6  | 25,33 |  |  | 1 | 0,00 | 0,00 |  |
| P40189 | Interleukin-6 receptor subunit beta                            | IL6ST  | Cell surface protein | In Ohr | 5  | 10,67 |  |  | 1 | 0,00 | 0,00 |  |
| Q9Y219 | Protein jagged-2                                               | JAG2   | Cell surface protein | In Ohr | 6  | 20,00 |  |  | 1 | 0,00 | 0,00 |  |
| P24043 | Laminin subunit alpha-2                                        | LAMA2  | Cell surface protein | In Ohr | 4  | 12,00 |  |  | 1 | 0,00 | 0,00 |  |
| Q96JA1 | Leucine-rich repeats and immunoglobulin-like domains protein 1 | LRIG1  | Cell surface protein | In Ohr | 6  | 16,00 |  |  | 1 | 0,00 | 0,00 |  |
| O75197 | Low-density lipoprotein receptor-related protein 5             | LRP5   | Cell surface protein | In Ohr | 13 | 49,33 |  |  | 1 | 0,00 | 0,00 |  |
| O95274 | Ly6/PLAUR domain-containing protein 3                          | LYPD3  | Cell surface protein | In Ohr | 5  | 36,00 |  |  | 1 | 0,00 | 0,00 |  |
| P55082 | Microfibril-associated glycoprotein 3                          | MFAP3  | Cell surface protein | In Ohr | 3  | 8,00  |  |  | 1 | 0,00 | 0,00 |  |
| Q8NFZ4 | Neuroigin-2                                                    | NLGN2  | Cell surface protein | In Ohr | 4  | 9,33  |  |  | 1 | 0,00 | 0,00 |  |

|        |                                                                                                                                                     |        |                      |        |    |       |  |  |   |      |      |  |
|--------|-----------------------------------------------------------------------------------------------------------------------------------------------------|--------|----------------------|--------|----|-------|--|--|---|------|------|--|
| P46531 | Neurogenic locus notch homolog protein 1                                                                                                            | NOTCH1 | Cell surface protein | In Ohr | 17 | 64,00 |  |  | 1 | 0,00 | 0,00 |  |
| O60462 | Neuropilin-2                                                                                                                                        | NRP2   | Cell surface protein | In Ohr | 5  | 13,33 |  |  | 1 | 0,00 | 0,00 |  |
| P07602 | Prosaposin                                                                                                                                          | PSAP   | Cell surface protein | In Ohr | 9  | 40,00 |  |  | 1 | 0,00 | 0,00 |  |
| Q92626 | Peroxidasin homolog                                                                                                                                 | PXDN   | Cell surface protein | In Ohr | 5  | 12,00 |  |  | 1 | 0,00 | 0,00 |  |
| Q6ZRP7 | Sulfhydryl oxidase 2                                                                                                                                | QSOX2  | Cell surface protein | In Ohr | 17 | 80,00 |  |  | 1 | 0,00 | 0,00 |  |
| P61026 | Ras-related protein Rab-10                                                                                                                          | RAB10  | Cell surface protein | In Ohr | 5  | 20,00 |  |  | 1 | 0,00 | 0,00 |  |
| Q5JTH9 | RRP12-like protein                                                                                                                                  | RRP12  | Cell surface protein | In Ohr | 4  | 10,67 |  |  | 1 | 0,00 | 0,00 |  |
| P34925 | Tyrosine-protein kinase RYK                                                                                                                         | RYK    | Cell surface protein | In Ohr | 4  | 14,67 |  |  | 1 | 0,00 | 0,00 |  |
| Q6UWP8 | Suprabasin                                                                                                                                          | SBSN   | Cell surface protein | In Ohr | 2  | 4,00  |  |  | 1 | 0,00 | 0,00 |  |
| Q9C0C4 | Semaphorin-4C                                                                                                                                       | SEMA4C | Cell surface protein | In Ohr | 3  | 5,33  |  |  | 1 | 0,00 | 0,00 |  |
| Q8NFY4 | Semaphorin-6D                                                                                                                                       | SEMA6D | Cell surface protein | In Ohr | 6  | 20,00 |  |  | 1 | 0,00 | 0,00 |  |
| B3KNK2 | cdNA FLJ14770 fis, clone NT2RP3004207, highly similar to Homo sapiens seizure related 6 homolog (mouse)-like 2 (SEZ6L2), transcript variant 1, mRNA | SEZ6L2 | Cell surface protein | In Ohr | 6  | 18,67 |  |  | 1 | 0,00 | 0,00 |  |
| Q5DT21 | Serine protease inhibitor Kazal-type 9                                                                                                              | SPINK9 | Cell surface protein | In Ohr | 2  | 9,33  |  |  | 1 | 0,00 | 0,00 |  |
| O43278 | Kunitz-type protease inhibitor 1                                                                                                                    | SPINT1 | Cell surface protein | In Ohr | 7  | 29,33 |  |  | 1 | 0,00 | 0,00 |  |
| Q03167 | Transforming growth factor beta receptor type 3                                                                                                     | TGFB3  | Cell surface protein | In Ohr | 10 | 40,00 |  |  | 1 | 0,00 | 0,00 |  |
| Q96QT4 | Transient receptor potential cation channel subfamily M member 7                                                                                    | TRPM7  | Cell surface protein | In Ohr | 5  | 12,00 |  |  | 1 | 0,00 | 0,00 |  |
| Q9C0H2 | Protein tweety homolog 3                                                                                                                            | TTYH3  | Cell surface protein | In Ohr | 2  | 5,33  |  |  | 1 | 0,00 | 0,00 |  |

|        |                                                             |         |                      |                 |    |       |    |    |   |      |      |      |
|--------|-------------------------------------------------------------|---------|----------------------|-----------------|----|-------|----|----|---|------|------|------|
| Q06418 | Tyrosine-protein kinase receptor TYRO3                      | TYRO3   | Cell surface protein | In 0hr          | 12 | 48,00 |    |    | 1 | 0,00 | 0,00 |      |
| Q9NYU2 | UDP-glucose:glycoprotein glucosyltransferase 1              | UGGT1   | Cell surface protein | In 0hr          | 5  | 9,33  |    |    | 1 | 0,00 | 0,00 |      |
| O60266 | Adenylate cyclase type 3                                    | ADCY3   | Cell surface protein | In 16&16hr(+)Ch | 10 |       | 13 | 8  |   |      |      | 0,62 |
| Q4KMQ2 | Anoctamin-6                                                 | ANO6    | Cell surface protein | In 16&16hr(+)Ch | 52 |       | 80 | 46 |   |      |      | 0,58 |
| Q9Y5Y0 | Feline leukemia virus subgroup C receptor-related protein 1 | FLVCR1  | Cell surface protein | In 16&16hr(+)Ch | 17 |       | 24 | 26 |   |      |      | 1,08 |
| Q99102 | Mucin-4                                                     | MUC4    | Cell surface protein | In 16&16hr(+)Ch | 4  |       | 5  | 6  |   |      |      | 1,20 |
| O14828 | Secretory carrier-associated membrane protein 3             | SCAMP3  | Cell surface protein | In 16&16hr(+)Ch | 12 |       | 8  | 19 |   |      |      | 2,38 |
| P41440 | Folate transporter 1                                        | SLC19A1 | Cell surface protein | In 16&16hr(+)Ch | 7  |       | 9  | 12 |   |      |      | 1,33 |
| P43007 | Neutral amino acid transporter A                            | SLC1A4  | Cell surface protein | In 16&16hr(+)Ch | 9  |       | 10 | 12 |   |      |      | 1,20 |
| Q5T4S7 | E3 ubiquitin-protein ligase UBR4                            | UBR4    | Cell surface protein | In 16&16hr(+)Ch | 14 |       | 17 | 8  |   |      |      | 0,47 |
| Q9NUQ8 | ATP-binding cassette sub-family F member 3                  | ABCF3   | Cell surface protein | In 16hr         | 4  |       | 7  |    |   |      |      |      |
| P63010 | AP-2 complex subunit beta                                   | AP2B1   | Cell surface protein | In 16hr         | 3  |       | 5  |    |   |      |      |      |
| Q13733 | Sodium/potassium-transporting ATPase subunit alpha-4        | ATP1A4  | Cell surface protein | In 16hr         | 3  |       | 8  |    |   |      |      |      |
| P23634 | Plasma membrane calcium-transporting ATPase 4               | ATP2B4  | Cell surface protein | In 16hr         | 2  |       | 2  |    |   |      |      |      |
| P35556 | Fibrillin-2                                                 | FBN2    | Cell surface protein | In 16hr         | 5  |       | 21 |    |   |      |      |      |
| Q7Z2K8 | G protein-regulated inducer of neurite outgrowth 1          | GPRIN1  | Cell surface protein | In 16hr         | 2  |       | 10 |    |   |      |      |      |
| Q7Z3J3 | RanBP2-like and GRIP domain-containing protein 4            | RGPD4   | Cell surface protein | In 16hr         | 3  |       | 4  |    |   |      |      |      |

|            |                                                                |          |                      |              |    |  |    |  |  |  |  |  |
|------------|----------------------------------------------------------------|----------|----------------------|--------------|----|--|----|--|--|--|--|--|
| Q9NQC3     | Reticulon-4                                                    | RTN4     | Cell surface protein | In 16hr      | 2  |  | 5  |  |  |  |  |  |
| Q9NY46     | Sodium channel protein type 3 subunit alpha                    | SCN3A    | Cell surface protein | In 16hr      | 2  |  | 16 |  |  |  |  |  |
| O95347     | Structural maintenance of chromosomes protein 2                | SMC2     | Cell surface protein | In 16hr      | 2  |  | 3  |  |  |  |  |  |
| Q8WXH0     | Nesprin-2                                                      | SYNE2    | Cell surface protein | In 16hr      | 5  |  | 6  |  |  |  |  |  |
| Q92973     | Transportin-1                                                  | TNPO1    | Cell surface protein | In 16hr      | 2  |  | 6  |  |  |  |  |  |
| Q9UNQ0     | ATP-binding cassette sub-family G member 2                     | ABCG2    | Cell surface protein | In 16hr(+)Ch | 4  |  | 6  |  |  |  |  |  |
| Q9H7F0     | Probable cation-transporting ATPase 13A3                       | ATP13A3  | Cell surface protein | In 16hr(+)Ch | 3  |  | 7  |  |  |  |  |  |
| Q93050     | V-type proton ATPase 116 kDa subunit a isoform 1               | ATP6V0A1 | Cell surface protein | In 16hr(+)Ch | 2  |  | 6  |  |  |  |  |  |
| Q9P265     | Disco-interacting protein 2 homolog B                          | DIP2B    | Cell surface protein | In 16hr(+)Ch | 14 |  | 38 |  |  |  |  |  |
| Q9H223     | EH domain-containing protein 4                                 | EHD4     | Cell surface protein | In 16hr(+)Ch | 5  |  | 10 |  |  |  |  |  |
| P23458     | Tyrosine-protein kinase JAK1                                   | JAK1     | Cell surface protein | In 16hr(+)Ch | 20 |  | 37 |  |  |  |  |  |
| Q86X29     | Lipolysis-stimulated lipoprotein receptor                      | LSR      | Cell surface protein | In 16hr(+)Ch | 2  |  | 8  |  |  |  |  |  |
| Q9NS15     | Latent-transforming growth factor beta-binding protein 3       | LTBP3    | Cell surface protein | In 16hr(+)Ch | 2  |  | 4  |  |  |  |  |  |
| A0A023SGA8 | Truncated MHC class I polypeptide-related protein A (Fragment) | MICA     | Cell surface protein | In 16hr(+)Ch | 4  |  | 27 |  |  |  |  |  |
| O95297     | Myelin protein zero-like protein 1                             | MPZL1    | Cell surface protein | In 16hr(+)Ch | 2  |  | 7  |  |  |  |  |  |
| Q93086     | P2X purinoceptor 5                                             | P2RX5    | Cell surface protein | In 16hr(+)Ch | 2  |  | 5  |  |  |  |  |  |
| Q6S8J3     | POTE ankyrin domain family member E                            | POTEE    | Cell surface protein | In 16hr(+)Ch | 2  |  | 2  |  |  |  |  |  |

|        |                                                            |          |                          |                   |    |        |     |     |   |      |      |      |
|--------|------------------------------------------------------------|----------|--------------------------|-------------------|----|--------|-----|-----|---|------|------|------|
| A5A3E0 | POTE ankyrin domain family member F                        | POTEF    | Cell surface protein     | In 16hr(+)Ch      | 3  |        |     | 3   |   |      |      |      |
| P46060 | Ran GTPase-activating protein 1                            | RANGAP1  | Cell surface protein     | In 16hr(+)Ch      | 2  |        |     | 4   |   |      |      |      |
| Q8NC42 | E3 ubiquitin-protein ligase RNF149                         | RNF149   | Cell surface protein     | In 16hr(+)Ch      | 4  |        |     | 12  |   |      |      |      |
| O00767 | Acyl-CoA desaturase                                        | SCD      | Cell surface protein     | In 16hr(+)Ch      | 2  |        |     | 8   |   |      |      |      |
| Q9NRX5 | Serine incorporator 1                                      | SERINC1  | Cell surface protein     | In 16hr(+)Ch      | 2  |        |     | 3   |   |      |      |      |
| Q9UP95 | Solute carrier family 12 member 4                          | SLC12A4  | Cell surface protein     | In 16hr(+)Ch      | 2  |        |     | 3   |   |      |      |      |
| Q8N370 | Large neutral amino acids transporter small subunit 4      | SLC43A2  | Cell surface protein     | In 16hr(+)Ch      | 16 |        |     | 56  |   |      |      |      |
| Q9Y289 | Sodium-dependent multivitamin transporter                  | SLC5A6   | Cell surface protein     | In 16hr(+)Ch      | 4  |        |     | 10  |   |      |      |      |
| P52569 | Low affinity cationic amino acid transporter 2             | SLC7A2   | Cell surface protein     | In 16hr(+)Ch      | 6  |        |     | 13  |   |      |      |      |
| Q8MH63 | Putative L-type amino acid transporter 1-like protein MLAS | SLC7A5P1 | Cell surface protein     | In 16hr(+)Ch      | 2  |        |     | 2   |   |      |      |      |
| Q9NZ01 | Very-long-chain enoyl-CoA reductase                        | TECR     | Cell surface protein     | In 16hr(+)Ch      | 2  |        |     | 7   |   |      |      |      |
| P57088 | Transmembrane protein 33                                   | TMEM33   | Cell surface protein     | In 16hr(+)Ch      | 3  |        |     | 16  |   |      |      |      |
| P35222 | Catenin beta-1                                             | CTNNB1   | Non-cell surface protein | In 0&16&16hr(+)Ch | 91 | 265,33 | 153 | 152 | 1 | 0,58 | 0,57 | 0,99 |
| P43304 | Glycerol-3-phosphate dehydrogenase, mitochondrial          | GPD2     | Non-cell surface protein | In 0&16&16hr(+)Ch | 38 | 49,33  | 20  | 26  | 1 | 0,41 | 0,53 | 1,30 |
| Q9P1T7 | MyoD family inhibitor domain-containing protein            | MDFIC    | Non-cell surface protein | In 0&16&16hr(+)Ch | 9  | 10,67  | 6   | 5   | 1 | 0,56 | 0,47 | 0,83 |
| P21589 | 5'-nucleotidase                                            | NT5E     | Non-cell surface protein | In 0&16&16hr(+)Ch | 33 | 65,33  | 30  | 31  | 1 | 0,46 | 0,47 | 1,03 |
| P40429 | 60S ribosomal protein L13a                                 | RPL13A   | Non-cell surface protein | In 0&16&16hr(+)Ch | 22 | 40,00  | 7   | 12  | 1 | 0,18 | 0,30 | 1,71 |

|        |                                                       |         |                          |                    |    |       |    |    |   |      |      |      |
|--------|-------------------------------------------------------|---------|--------------------------|--------------------|----|-------|----|----|---|------|------|------|
| P61313 | 60S ribosomal protein L15                             | RPL15   | Non-cell surface protein | In 0&16&16hr(+) Ch | 13 | 29,33 | 17 | 18 | 1 | 0,58 | 0,61 | 1,06 |
| P62280 | 40S ribosomal protein S11                             | RPS11   | Non-cell surface protein | In 0&16&16hr(+) Ch | 32 | 30,67 | 34 | 37 | 1 | 1,11 | 1,21 | 1,09 |
| P15880 | 40S ribosomal protein S2                              | RPS2    | Non-cell surface protein | In 0&16&16hr(+) Ch | 54 | 77,33 | 65 | 55 | 1 | 0,84 | 0,71 | 0,85 |
| P62266 | 40S ribosomal protein S23                             | RPS23   | Non-cell surface protein | In 0&16&16hr(+) Ch | 25 | 26,67 | 27 | 25 | 1 | 1,01 | 0,94 | 0,93 |
| P62753 | 40S ribosomal protein S6                              | RPS6    | Non-cell surface protein | In 0&16&16hr(+) Ch | 16 | 33,33 | 26 | 10 | 1 | 0,78 | 0,30 | 0,38 |
| P46781 | 40S ribosomal protein S9                              | RPS9    | Non-cell surface protein | In 0&16&16hr(+) Ch | 30 | 33,33 | 37 | 24 | 1 | 1,11 | 0,72 | 0,65 |
| Q00325 | Phosphate carrier protein, mitochondrial              | SLC25A3 | Non-cell surface protein | In 0&16&16hr(+) Ch | 50 | 82,67 | 91 | 94 | 1 | 1,10 | 1,14 | 1,03 |
| P55265 | Double-stranded RNA-specific adenosine deaminase      | ADAR    | Non-cell surface protein | In 0&16hr          | 6  | 5,33  | 6  |    | 1 | 1,13 | 0,00 | 0,00 |
| Q9NVH1 | DnaJ homolog subfamily C member 11                    | DNAJC11 | Non-cell surface protein | In 0&16hr          | 8  | 18,67 | 6  |    | 1 | 0,32 | 0,00 | 0,00 |
| P39023 | 60S ribosomal protein L3                              | RPL3    | Non-cell surface protein | In 0&16hr          | 10 | 25,33 | 5  |    | 1 | 0,20 | 0,00 | 0,00 |
| O75533 | Splicing factor 3B subunit 1                          | SF3B1   | Non-cell surface protein | In 0&16hr(+)Ch     | 9  | 18,67 |    | 7  | 1 | 0,00 | 0,38 |      |
| Q9NZB2 | Constitutive coactivator of PPAR-gamma-like protein 1 | FAM120A | Non-cell surface protein | In 16&16hr(+)Ch    | 15 |       | 20 | 14 |   |      |      | 0,70 |
| Q7Z6Z7 | E3 ubiquitin-protein ligase HUWE1                     | HUWE1   | Non-cell surface protein | In 16&16hr(+)Ch    | 11 |       | 10 | 9  |   |      |      | 0,90 |
| Q02543 | 60S ribosomal protein L18a                            | RPL18A  | Non-cell surface protein | In 16&16hr(+)Ch    | 8  |       | 15 | 11 |   |      |      | 0,73 |
| P46779 | 60S ribosomal protein L28                             | RPL28   | Non-cell surface protein | In 16&16hr(+)Ch    | 9  |       | 15 | 8  |   |      |      | 0,53 |
| P42677 | 40S ribosomal protein S27                             | RPS27   | Non-cell surface protein | In 16&16hr(+)Ch    | 4  |       | 5  | 8  |   |      |      | 1,60 |
| O60701 | UDP-glucose 6-dehydrogenase                           | UGDH    | Non-cell surface protein | In 16&16hr(+)Ch    | 9  |       | 12 | 5  |   |      |      | 0,42 |

|        |                                                                  |          |                          |         |    |       |   |  |   |      |      |  |
|--------|------------------------------------------------------------------|----------|--------------------------|---------|----|-------|---|--|---|------|------|--|
| Q9H845 | Acyl-CoA dehydrogenase family member 9, mitochondrial            | ACAD9    | Non-cell surface protein | In 0hr  | 3  | 8,00  |   |  | 1 | 0,00 | 0,00 |  |
| P22413 | Ectonucleotide pyrophosphatase/phosphodiesterase family member 1 | ENPP1    | Non-cell surface protein | In 0hr  | 10 | 28,00 |   |  | 1 | 0,00 | 0,00 |  |
| Q9Y5L3 | Ectonucleoside triphosphate diphosphohydrolase 2                 | ENTPD2   | Non-cell surface protein | In 0hr  | 3  | 6,67  |   |  | 1 | 0,00 | 0,00 |  |
| P78347 | General transcription factor II-I                                | GTF2I    | Non-cell surface protein | In 0hr  | 3  | 9,33  |   |  | 1 | 0,00 | 0,00 |  |
| Q9UMN6 | Histone-lysine N-methyltransferase 2B                            | KMT2B    | Non-cell surface protein | In 0hr  | 5  | 10,67 |   |  | 1 | 0,00 | 0,00 |  |
| O75694 | Nuclear pore complex protein Nup155                              | NUP155   | Non-cell surface protein | In 0hr  | 5  | 9,33  |   |  | 1 | 0,00 | 0,00 |  |
| P09874 | Poly [ADP-ribose] polymerase 1                                   | PARP1    | Non-cell surface protein | In 0hr  | 8  | 16,00 |   |  | 1 | 0,00 | 0,00 |  |
| Q05519 | Serine/arginine-rich splicing factor 11                          | SRSF11   | Non-cell surface protein | In 0hr  | 2  | 5,33  |   |  | 1 | 0,00 | 0,00 |  |
| O94826 | Mitochondrial import receptor subunit TOM70                      | TOMM70A  | Non-cell surface protein | In 0hr  | 2  | 4,00  |   |  | 1 | 0,00 | 0,00 |  |
| Q969P6 | DNA topoisomerase I, mitochondrial                               | TOP1MT   | Non-cell surface protein | In 0hr  | 2  | 5,33  |   |  | 1 | 0,00 | 0,00 |  |
| O00308 | NEDD4-like E3 ubiquitin-protein ligase WWP2                      | WWP2     | Non-cell surface protein | In 0hr  | 2  | 5,33  |   |  | 1 | 0,00 | 0,00 |  |
| Q86VP6 | Cullin-associated NEDD8-dissociated protein 1                    | CAND1    | Non-cell surface protein | In 16hr | 4  |       | 8 |  |   |      |      |  |
| Q9Y2R4 | Probable ATP-dependent RNA helicase DDX52                        | DDX52    | Non-cell surface protein | In 16hr | 2  |       | 3 |  |   |      |      |  |
| Q9Y6G9 | Cytoplasmic dynein 1 light intermediate chain 1                  | DYNC1L1  | Non-cell surface protein | In 16hr | 2  |       | 2 |  |   |      |      |  |
| P60842 | Eukaryotic initiation factor 4A-I                                | EIF4A1   | Non-cell surface protein | In 16hr | 3  |       | 7 |  |   |      |      |  |
| P16403 | Histone H1.2                                                     | HIST1H1C | Non-cell surface protein | In 16hr | 3  |       | 7 |  |   |      |      |  |
| P00338 | L-lactate dehydrogenase A chain                                  | LDHA     | Non-cell surface protein | In 16hr | 2  |       | 4 |  |   |      |      |  |

|        |                                                                    |         |                          |              |   |  |    |   |  |  |  |  |
|--------|--------------------------------------------------------------------|---------|--------------------------|--------------|---|--|----|---|--|--|--|--|
| P52701 | DNA mismatch repair protein Msh6                                   | MSH6    | Non-cell surface protein | In 16hr      | 3 |  | 4  |   |  |  |  |  |
| P62829 | 60S ribosomal protein L23                                          | RPL23   | Non-cell surface protein | In 16hr      | 2 |  | 4  |   |  |  |  |  |
| P62263 | 40S ribosomal protein S14                                          | RPS14   | Non-cell surface protein | In 16hr      | 2 |  | 4  |   |  |  |  |  |
| Q9Y310 | tRNA-splicing ligase RtcB homolog                                  | RTCB    | Non-cell surface protein | In 16hr      | 3 |  | 4  |   |  |  |  |  |
| Q8TDB8 | Solute carrier family 2, facilitated glucose transporter member 14 | SLC2A14 | Non-cell surface protein | In 16hr      | 5 |  | 21 |   |  |  |  |  |
| Q9UPN3 | Microtubule-actin cross-linking factor 1, isoforms 1/2/3/5         | MACF1   | Non-cell surface protein | In 16hr(+)Ch | 4 |  |    | 6 |  |  |  |  |
| P46776 | 60S ribosomal protein L27a                                         | RPL27A  | Non-cell surface protein | In 16hr(+)Ch | 2 |  |    | 5 |  |  |  |  |
| P36578 | 60S ribosomal protein L4                                           | RPL4    | Non-cell surface protein | In 16hr(+)Ch | 2 |  |    | 5 |  |  |  |  |



**Table S4.** Proteins that were detected and downregulated in condition B by 5 fold or more.

| UniProt Accession | Protein                                         | Gene      | Cell Surface Proteins | Detection          | Total Peptides | NormSC-0hr | NormSC-16hr | NormSC-16hrCh | 0hr/0hr | 16hr/0hr | 16hrCh/0hr | (+)/(−) Chloroquine |
|-------------------|-------------------------------------------------|-----------|-----------------------|--------------------|----------------|------------|-------------|---------------|---------|----------|------------|---------------------|
| P29317            | Ephrin type-A receptor 2                        | EPHA2     | Cell surface protein  | In 0&16&16hr (+)Ch | 69             | 194,67     | 8           | 91            | 1       | 0,04     | 0,47       | 11,38               |
| Q13641            | Trophoblast glycoprotein                        | TPBG      | Cell surface protein  | In 0&16&16hr (+)Ch | 15             | 42,67      | 2           | 22            | 1       | 0,05     | 0,52       | 11,00               |
| Q10589            | Bone marrow stromal antigen 2                   | BST2      | Cell surface protein  | In 0&16&16hr (+)Ch | 12             | 21,33      | 4           | 32            | 1       | 0,19     | 1,50       | 8,00                |
| O15230            | Laminin subunit alpha-5                         | LAMA5     | Cell surface protein  | In 0&16&16hr (+)Ch | 169            | 774,67     | 18          | 92            | 1       | 0,02     | 0,12       | 5,11                |
| Q92859            | Neogenin                                        | NEO1      | Cell surface protein  | In 0&16&16hr (+)Ch | 29             | 92,00      | 3           | 15            | 1       | 0,03     | 0,16       | 5,00                |
| Q92896            | Golgi apparatus protein 1                       | GLG1      | Cell surface protein  | In 0&16&16hr (+)Ch | 62             | 237,33     | 12          | 52            | 1       | 0,05     | 0,22       | 4,33                |
| O75882            | Attractin                                       | ATRN      | Cell surface protein  | In 0&16&16hr (+)Ch | 55             | 178,67     | 22          | 92            | 1       | 0,12     | 0,51       | 4,18                |
| O95672            | Endothelin-converting enzyme-like 1             | ECEL1     | Cell surface protein  | In 0&16&16hr (+)Ch | 23             | 54,67      | 6           | 19            | 1       | 0,11     | 0,35       | 3,17                |
| Q96J84            | Kin of IRRE-like protein 1                      | KIRREL    | Cell surface protein  | In 0&16&16hr (+)Ch | 47             | 182,67     | 16          | 50            | 1       | 0,09     | 0,27       | 3,13                |
| Q9ULH0            | Kinase D-interacting substrate of 220 kDa       | KIDINS220 | Cell surface protein  | In 0&16&16hr (+)Ch | 46             | 80,00      | 13          | 40            | 1       | 0,16     | 0,50       | 3,08                |
| P11717            | Cation-independent mannose-6-phosphate receptor | IGF2R     | Cell surface protein  | In 0&16&16hr (+)Ch | 438            | 2164,00    | 289         | 881           | 1       | 0,13     | 0,41       | 3,05                |
| O60291            | E3 ubiquitin-protein ligase MGRN1               | MGRN1     | Cell surface protein  | In 0&16&16hr (+)Ch | 18             | 60,00      | 11          | 32            | 1       | 0,18     | 0,53       | 2,91                |
| Q04721            | Neurogenic locus notch homolog protein 2        | NOTCH2    | Cell surface protein  | In 0&16&16hr (+)Ch | 112            | 466,67     | 40          | 95            | 1       | 0,09     | 0,20       | 2,38                |
| P11047            | Laminin subunit gamma-1                         | LAMC1     | Cell surface protein  | In 0&16&16hr (+)Ch | 55             | 222,67     | 12          | 28            | 1       | 0,05     | 0,13       | 2,33                |
| Q9ULI3            | Protein HEG homolog 1                           | HEG1      | Cell surface protein  | In 0&16&16hr (+)Ch | 26             | 96,00      | 12          | 28            | 1       | 0,13     | 0,29       | 2,33                |

|        |                                                                          |        |                      |                    |     |        |    |    |   |      |      |      |
|--------|--------------------------------------------------------------------------|--------|----------------------|--------------------|-----|--------|----|----|---|------|------|------|
| P78324 | Tyrosine-protein phosphatase non-receptor type substrate 1               | SIRPA  | Cell surface protein | In 0&16&16hr (+)Ch | 16  | 52,00  | 9  | 19 | 1 | 0,17 | 0,37 | 2,11 |
| Q969P0 | Immunoglobulin superfamily member 8                                      | IGSF8  | Cell surface protein | In 0&16&16hr (+)Ch | 33  | 158,67 | 24 | 44 | 1 | 0,15 | 0,28 | 1,83 |
| Q6PJG9 | Leucine-rich repeat and fibronectin type-III domain-containing protein 4 | LRFN4  | Cell surface protein | In 0&16&16hr (+)Ch | 26  | 61,33  | 12 | 22 | 1 | 0,20 | 0,36 | 1,83 |
| Q9NQS3 | Nectin-3                                                                 | PVRL3  | Cell surface protein | In 0&16&16hr (+)Ch | 23  | 45,33  | 8  | 14 | 1 | 0,18 | 0,31 | 1,75 |
| P15509 | Granulocyte-macrophage colony-stimulating factor receptor subunit alpha  | CSF2RA | Cell surface protein | In 0&16&16hr (+)Ch | 15  | 65,33  | 10 | 16 | 1 | 0,15 | 0,24 | 1,60 |
| Q9H1U4 | Multiple epidermal growth factor-like domains protein 9                  | MEGF9  | Cell surface protein | In 0&16&16hr (+)Ch | 23  | 74,67  | 14 | 22 | 1 | 0,19 | 0,29 | 1,57 |
| Q13444 | Disintegrin and metalloproteinase domain-containing protein 15           | ADAM15 | Cell surface protein | In 0&16&16hr (+)Ch | 40  | 146,67 | 30 | 43 | 1 | 0,20 | 0,29 | 1,43 |
| P07996 | Thrombospondin-1                                                         | THBS1  | Cell surface protein | In 0&16&16hr (+)Ch | 43  | 133,33 | 13 | 18 | 1 | 0,10 | 0,14 | 1,38 |
| O00468 | Agrin                                                                    | AGRN   | Cell surface protein | In 0&16&16hr (+)Ch | 75  | 345,33 | 12 | 16 | 1 | 0,03 | 0,05 | 1,33 |
| P17342 | Atrial natriuretic peptide receptor 3                                    | NPR3   | Cell surface protein | In 0&16&16hr (+)Ch | 27  | 105,33 | 15 | 20 | 1 | 0,14 | 0,19 | 1,33 |
| O14786 | Neuropilin-1                                                             | NRP1   | Cell surface protein | In 0&16&16hr (+)Ch | 70  | 277,33 | 27 | 33 | 1 | 0,10 | 0,12 | 1,22 |
| E9PGC5 | Receptor-type tyrosine-protein phosphatase kappa                         | PTPRK  | Cell surface protein | In 0&16&16hr (+)Ch | 54  | 208,00 | 32 | 36 | 1 | 0,15 | 0,17 | 1,13 |
| B7ZLD0 | LRP6 protein                                                             | LRP6   | Cell surface protein | In 0&16&16hr (+)Ch | 38  | 152,00 | 14 | 12 | 1 | 0,09 | 0,08 | 0,86 |
| Q07954 | Pro-low-density lipoprotein receptor-related protein 1                   | LRP1   | Cell surface protein | In 0&16&16hr (+)Ch | 103 | 502,67 | 27 | 11 | 1 | 0,05 | 0,02 | 0,41 |
| Q9NPH3 | Interleukin-1 receptor accessory protein                                 | IL1RAP | Cell surface protein | In 0&16hr          | 20  | 54,67  | 9  |    | 1 | 0,16 | 0,00 | 0,00 |
| O75691 | Small subunit processome component 20 homolog                            | UTP20  | Cell surface protein | In 0&16hr          | 11  | 24,00  | 4  |    | 1 | 0,17 | 0,00 | 0,00 |

**Table S5.** Proteins that were downregulated by 5 fold or more or undetected in condition B.

| UniProt Accession | Protein                                         | Gene      | Cell Surface Proteins | Detection          | Total Peptides | NormSC-0hr | NormSC-16hr | NormSC-16hrCh | 0hr/0hr | 16hr/0hr | 16hrCh/0hr | (+)/(-) Chloroquine |
|-------------------|-------------------------------------------------|-----------|-----------------------|--------------------|----------------|------------|-------------|---------------|---------|----------|------------|---------------------|
| P29317            | Ephrin type-A receptor 2                        | EPHA2     | Cell surface protein  | In 0&16&16hr (+)Ch | 69             | 194,67     | 8           | 91            | 1       | 0,04     | 0,47       | 11,38               |
| Q13641            | Trophoblast glycoprotein                        | TPBG      | Cell surface protein  | In 0&16&16hr (+)Ch | 15             | 42,67      | 2           | 22            | 1       | 0,05     | 0,52       | 11,00               |
| Q10589            | Bone marrow stromal antigen 2                   | BST2      | Cell surface protein  | In 0&16&16hr (+)Ch | 12             | 21,33      | 4           | 32            | 1       | 0,19     | 1,50       | 8,00                |
| O15230            | Laminin subunit alpha-5                         | LAMA5     | Cell surface protein  | In 0&16&16hr (+)Ch | 169            | 774,67     | 18          | 92            | 1       | 0,02     | 0,12       | 5,11                |
| Q92859            | Neogenin                                        | NEO1      | Cell surface protein  | In 0&16&16hr (+)Ch | 29             | 92,00      | 3           | 15            | 1       | 0,03     | 0,16       | 5,00                |
| Q92896            | Golgi apparatus protein 1                       | GLG1      | Cell surface protein  | In 0&16&16hr (+)Ch | 62             | 237,33     | 12          | 52            | 1       | 0,05     | 0,22       | 4,33                |
| O75882            | Attractin                                       | ATRN      | Cell surface protein  | In 0&16&16hr (+)Ch | 55             | 178,67     | 22          | 92            | 1       | 0,12     | 0,51       | 4,18                |
| O95672            | Endothelin-converting enzyme-like 1             | ECEL1     | Cell surface protein  | In 0&16&16hr (+)Ch | 23             | 54,67      | 6           | 19            | 1       | 0,11     | 0,35       | 3,17                |
| Q96J84            | Kin of IRRE-like protein 1                      | KIRREL    | Cell surface protein  | In 0&16&16hr (+)Ch | 47             | 182,67     | 16          | 50            | 1       | 0,09     | 0,27       | 3,13                |
| Q9ULH0            | Kinase D-interacting substrate of 220 kDa       | KIDINS220 | Cell surface protein  | In 0&16&16hr (+)Ch | 46             | 80,00      | 13          | 40            | 1       | 0,16     | 0,50       | 3,08                |
| P11717            | Cation-independent mannose-6-phosphate receptor | IGF2R     | Cell surface protein  | In 0&16&16hr (+)Ch | 438            | 2164,00    | 289         | 881           | 1       | 0,13     | 0,41       | 3,05                |
| Q9NP58            | ATP-binding cassette sub-family B member 6      | ABCB6     | Cell surface protein  | In 0&16hr(+)Ch     | 11             | 6,67       |             | 17            | 1       | 0,00     | 2,55       |                     |
| Q9NPF0            | CD320 antigen                                   | CD320     | Cell surface protein  | In 0&16hr(+)Ch     | 5              | 26,67      |             | 9             | 1       | 0,00     | 0,34       |                     |
| O75976            | Carboxypeptidase D                              | CPD       | Cell surface protein  | In 0&16hr(+)Ch     | 34             | 88,00      |             | 22            | 1       | 0,00     | 0,25       |                     |
| P14384            | Carboxypeptidase M                              | CPM       | Cell surface protein  | In 0&16hr(+)Ch     | 4              | 9,33       |             | 5             | 1       | 0,00     | 0,54       |                     |

|        |                                                             |        |                      |                        |    |        |  |     |   |      |      |
|--------|-------------------------------------------------------------|--------|----------------------|------------------------|----|--------|--|-----|---|------|------|
| Q16832 | Discoidin domain-containing receptor 2                      | DDR2   | Cell surface protein | In 0&16hr(+)<br>C<br>h | 23 | 102,67 |  | 7   | 1 | 0,00 | 0,07 |
| Q14574 | Desmocollin-3                                               | DSC3   | Cell surface protein | In 0&16hr(+)<br>C<br>h | 10 | 33,33  |  | 4   | 1 | 0,00 | 0,12 |
| Q9BSJ8 | Extended synaptotagmin-1                                    | ESYT1  | Cell surface protein | In 0&16hr(+)<br>C<br>h | 5  | 4,00   |  | 4   | 1 | 0,00 | 1,00 |
| Q14517 | Protocadherin Fat 1                                         | FAT1   | Cell surface protein | In 0&16hr(+)<br>C<br>h | 77 | 258,67 |  | 17  | 1 | 0,00 | 0,07 |
| P15586 | N-acetylglucosamine-6-sulfatase                             | GNS    | Cell surface protein | In 0&16hr(+)<br>C<br>h | 12 | 28,00  |  | 10  | 1 | 0,00 | 0,36 |
| Q9Y653 | G-protein coupled receptor 56                               | GPR56  | Cell surface protein | In 0&16hr(+)<br>C<br>h | 12 | 28,00  |  | 8   | 1 | 0,00 | 0,29 |
| O75144 | ICOS ligand                                                 | ICOSLG | Cell surface protein | In 0&16hr(+)<br>C<br>h | 5  | 12,00  |  | 5   | 1 | 0,00 | 0,42 |
| O75054 | Immunoglobulin superfamily member 3                         | IGSF3  | Cell surface protein | In 0&16hr(+)<br>C<br>h | 21 | 52,00  |  | 11  | 1 | 0,00 | 0,21 |
| Q96J02 | E3 ubiquitin-protein ligase Itchy homolog                   | ITCH   | Cell surface protein | In 0&16hr(+)<br>C<br>h | 9  | 6,67   |  | 13  | 1 | 0,00 | 1,95 |
| P07942 | Laminin subunit beta-1                                      | LAMB1  | Cell surface protein | In 0&16hr(+)<br>C<br>h | 40 | 169,33 |  | 17  | 1 | 0,00 | 0,10 |
| P01130 | Low-density lipoprotein receptor                            | LDLR   | Cell surface protein | In 0&16hr(+)<br>C<br>h | 61 | 185,33 |  | 185 | 1 | 0,00 | 1,00 |
| Q9BXB1 | Leucine-rich repeat-containing G-protein coupled receptor 4 | LGR4   | Cell surface protein | In 0&16hr(+)<br>C<br>h | 15 | 18,67  |  | 15  | 1 | 0,00 | 0,80 |
| P42702 | Leukemia inhibitory factor receptor                         | LIFR   | Cell surface protein | In 0&16hr(+)<br>C<br>h | 17 | 44,00  |  | 14  | 1 | 0,00 | 0,32 |
| Q14114 | Low-density lipoprotein receptor-related protein 8          | LRP8   | Cell surface protein | In 0&16hr(+)<br>C<br>h | 10 | 20,00  |  | 5   | 1 | 0,00 | 0,25 |
| Q99650 | Oncostatin-M-specific receptor subunit beta                 | OSMR   | Cell surface protein | In 0&16hr(+)<br>C<br>h | 16 | 21,33  |  | 19  | 1 | 0,00 | 0,89 |
| Q9H6A9 | Pecanex-like protein 3                                      | PCNXL3 | Cell surface protein | In 0&16hr(+)<br>C<br>h | 18 | 41,33  |  | 8   | 1 | 0,00 | 0,19 |

|        |                                                                          |          |                      |                       |     |        |    |    |   |      |      |      |
|--------|--------------------------------------------------------------------------|----------|----------------------|-----------------------|-----|--------|----|----|---|------|------|------|
| Q8IV08 | Phospholipase D3                                                         | PLD3     | Cell surface protein | In 0&16hr(+)<br>Ch    | 8   | 8,00   |    | 10 | 1 | 0,00 | 1,25 |      |
| O00469 | Procollagen-lysine,2-oxoglutarate 5-dioxygenase 2                        | PLOD2    | Cell surface protein | In 0&16hr(+)<br>Ch    | 12  | 17,33  |    | 16 | 1 | 0,00 | 0,92 |      |
| Q9NZ53 | Podocalyxin-like protein 2                                               | PODXL2   | Cell surface protein | In 0&16hr(+)<br>Ch    | 4   | 13,33  |    | 2  | 1 | 0,00 | 0,15 |      |
| Q15223 | Nectin-1                                                                 | PVRL1    | Cell surface protein | In 0&16hr(+)<br>Ch    | 8   | 13,33  |    | 11 | 1 | 0,00 | 0,83 |      |
| Q658P3 | Metalloreductase STEAP3                                                  | STEAP3   | Cell surface protein | In 0&16hr(+)<br>Ch    | 5   | 5,33   |    | 6  | 1 | 0,00 | 1,13 |      |
| Q6N022 | Teneurin-4                                                               | TENM4    | Cell surface protein | In 0&16hr(+)<br>Ch    | 5   | 13,33  |    | 6  | 1 | 0,00 | 0,45 |      |
| Q24JP5 | Transmembrane protein 132A                                               | TMEM132A | Cell surface protein | In 0&16hr(+)<br>Ch    | 24  | 100,00 |    | 15 | 1 | 0,00 | 0,15 |      |
| P41273 | Tumor necrosis factor ligand superfamily member 9                        | TNFSF9   | Cell surface protein | In 0&16hr(+)<br>Ch    | 8   | 12,00  |    | 8  | 1 | 0,00 | 0,67 |      |
| Q9UBH6 | Xenotropic and polytropic retrovirus receptor 1                          | XPR1     | Cell surface protein | In 0&16hr(+)<br>Ch    | 15  | 29,33  |    | 13 | 1 | 0,00 | 0,44 |      |
| O60291 | E3 ubiquitin-protein ligase MGRN1                                        | MGRN1    | Cell surface protein | In 0&16&16hr<br>(+)Ch | 18  | 60,00  | 11 | 32 | 1 | 0,18 | 0,53 | 2,91 |
| Q04721 | Neurogenic locus notch homolog protein 2                                 | NOTCH2   | Cell surface protein | In 0&16&16hr<br>(+)Ch | 112 | 466,67 | 40 | 95 | 1 | 0,09 | 0,20 | 2,38 |
| P11047 | Laminin subunit gamma-1                                                  | LAMC1    | Cell surface protein | In 0&16&16hr<br>(+)Ch | 55  | 222,67 | 12 | 28 | 1 | 0,05 | 0,13 | 2,33 |
| Q9ULI3 | Protein HEG homolog 1                                                    | HEG1     | Cell surface protein | In 0&16&16hr<br>(+)Ch | 26  | 96,00  | 12 | 28 | 1 | 0,13 | 0,29 | 2,33 |
| P78324 | Tyrosine-protein phosphatase non-receptor type substrate 1               | SIRPA    | Cell surface protein | In 0&16&16hr<br>(+)Ch | 16  | 52,00  | 9  | 19 | 1 | 0,17 | 0,37 | 2,11 |
| Q969P0 | Immunoglobulin superfamily member 8                                      | IGSF8    | Cell surface protein | In 0&16&16hr<br>(+)Ch | 33  | 158,67 | 24 | 44 | 1 | 0,15 | 0,28 | 1,83 |
| Q6PJG9 | Leucine-rich repeat and fibronectin type-III domain-containing protein 4 | LRFN4    | Cell surface protein | In 0&16&16hr<br>(+)Ch | 26  | 61,33  | 12 | 22 | 1 | 0,20 | 0,36 | 1,83 |

|        |                                                                         |        |                      |                    |     |        |    |    |   |      |      |      |
|--------|-------------------------------------------------------------------------|--------|----------------------|--------------------|-----|--------|----|----|---|------|------|------|
| Q9NQS3 | Nectin-3                                                                | PVRL3  | Cell surface protein | In 0&16&16hr (+)Ch | 23  | 45,33  | 8  | 14 | 1 | 0,18 | 0,31 | 1,75 |
| P15509 | Granulocyte-macrophage colony-stimulating factor receptor subunit alpha | CSF2RA | Cell surface protein | In 0&16&16hr (+)Ch | 15  | 65,33  | 10 | 16 | 1 | 0,15 | 0,24 | 1,60 |
| Q9H1U4 | Multiple epidermal growth factor-like domains protein 9                 | MEGF9  | Cell surface protein | In 0&16&16hr (+)Ch | 23  | 74,67  | 14 | 22 | 1 | 0,19 | 0,29 | 1,57 |
| Q13444 | Disintegrin and metalloproteinase domain-containing protein 15          | ADAM15 | Cell surface protein | In 0&16&16hr (+)Ch | 40  | 146,67 | 30 | 43 | 1 | 0,20 | 0,29 | 1,43 |
| P07996 | Thrombospondin-1                                                        | THBS1  | Cell surface protein | In 0&16&16hr (+)Ch | 43  | 133,33 | 13 | 18 | 1 | 0,10 | 0,14 | 1,38 |
| O00468 | Agrin                                                                   | AGRN   | Cell surface protein | In 0&16&16hr (+)Ch | 75  | 345,33 | 12 | 16 | 1 | 0,03 | 0,05 | 1,33 |
| P17342 | Atrial natriuretic peptide receptor 3                                   | NPR3   | Cell surface protein | In 0&16&16hr (+)Ch | 27  | 105,33 | 15 | 20 | 1 | 0,14 | 0,19 | 1,33 |
| O14786 | Neuropilin-1                                                            | NRP1   | Cell surface protein | In 0&16&16hr (+)Ch | 70  | 277,33 | 27 | 33 | 1 | 0,10 | 0,12 | 1,22 |
| E9PGC5 | Receptor-type tyrosine-protein phosphatase kappa                        | PTPRK  | Cell surface protein | In 0&16&16hr (+)Ch | 54  | 208,00 | 32 | 36 | 1 | 0,15 | 0,17 | 1,13 |
| B7ZLD0 | LRP6 protein                                                            | LRP6   | Cell surface protein | In 0&16&16hr (+)Ch | 38  | 152,00 | 14 | 12 | 1 | 0,09 | 0,08 | 0,86 |
| Q07954 | Pro-low-density lipoprotein receptor-related protein 1                  | LRP1   | Cell surface protein | In 0&16&16hr (+)Ch | 103 | 502,67 | 27 | 11 | 1 | 0,05 | 0,02 | 0,41 |
| Q9NPH3 | Interleukin-1 receptor accessory protein                                | IL1RAP | Cell surface protein | In 0&16hr          | 20  | 54,67  | 9  |    | 1 | 0,16 | 0,00 | 0,00 |
| O75691 | Small subunit processome component 20 homolog                           | UTP20  | Cell surface protein | In 0&16hr          | 11  | 24,00  | 4  |    | 1 | 0,17 | 0,00 | 0,00 |
| Q9BZC7 | ATP-binding cassette sub-family A member 2                              | ABCA2  | Cell surface protein | In 0hr             | 15  | 49,33  |    |    | 1 | 0,00 | 0,00 |      |
| P28288 | ATP-binding cassette sub-family D member 3                              | ABCD3  | Cell surface protein | In 0hr             | 5   | 10,67  |    |    | 1 | 0,00 | 0,00 |      |
| Q04771 | Activin receptor type-1                                                 | ACVR1  | Cell surface protein | In 0hr             | 3   | 6,67   |    |    | 1 | 0,00 | 0,00 |      |

|        |                                                                |         |                      |        |    |        |  |  |   |      |      |
|--------|----------------------------------------------------------------|---------|----------------------|--------|----|--------|--|--|---|------|------|
| Q14672 | Disintegrin and metalloproteinase domain-containing protein 10 | ADAM10  | Cell surface protein | In 0hr | 10 | 38,67  |  |  | 1 | 0,00 | 0,00 |
| Q13443 | Disintegrin and metalloproteinase domain-containing protein 9  | ADAM9   | Cell surface protein | In 0hr | 13 | 42,67  |  |  | 1 | 0,00 | 0,00 |
| P10696 | Alkaline phosphatase, placental-like                           | ALPPL2  | Cell surface protein | In 0hr | 2  | 10,67  |  |  | 1 | 0,00 | 0,00 |
| Q9HCJ1 | Progressive ankylosis protein homolog                          | ANKH    | Cell surface protein | In 0hr | 10 | 41,33  |  |  | 1 | 0,00 | 0,00 |
| Q9H6X2 | Anthrax toxin receptor 1                                       | ANTXR1  | Cell surface protein | In 0hr | 6  | 21,33  |  |  | 1 | 0,00 | 0,00 |
| P08133 | Annexin A6                                                     | ANXA6   | Cell surface protein | In 0hr | 7  | 21,33  |  |  | 1 | 0,00 | 0,00 |
| O94973 | AP-2 complex subunit alpha-2                                   | AP2A2   | Cell surface protein | In 0hr | 3  | 8,00   |  |  | 1 | 0,00 | 0,00 |
| P30530 | Tyrosine-protein kinase receptor UFO                           | AXL     | Cell surface protein | In 0hr | 16 | 60,00  |  |  | 1 | 0,00 | 0,00 |
| Q9Y5Z0 | Beta-secretase 2                                               | BACE2   | Cell surface protein | In 0hr | 6  | 22,67  |  |  | 1 | 0,00 | 0,00 |
| Q5VU97 | VWFA and cache domain-containing protein 1                     | CACHD1  | Cell surface protein | In 0hr | 15 | 50,67  |  |  | 1 | 0,00 | 0,00 |
| Q9HCU4 | Cadherin EGF LAG seven-pass G-type receptor 2                  | CELSR2  | Cell surface protein | In 0hr | 20 | 86,67  |  |  | 1 | 0,00 | 0,00 |
| Q07065 | Cytoskeleton-associated protein 4                              | CKAP4   | Cell surface protein | In 0hr | 2  | 4,00   |  |  | 1 | 0,00 | 0,00 |
| Q99715 | Collagen alpha-1(XII) chain                                    | COL12A1 | Cell surface protein | In 0hr | 67 | 260,00 |  |  | 1 | 0,00 | 0,00 |
| Q08345 | Epithelial discoidin domain-containing receptor 1              | DDR1    | Cell surface protein | In 0hr | 6  | 12,00  |  |  | 1 | 0,00 | 0,00 |
| Q08554 | Desmocollin-1                                                  | DSC1    | Cell surface protein | In 0hr | 4  | 22,67  |  |  | 1 | 0,00 | 0,00 |
| Q9UHX3 | EGF-like module-containing mucin-like hormone receptor-like 2  | EMR2    | Cell surface protein | In 0hr | 2  | 8,00   |  |  | 1 | 0,00 | 0,00 |

|        |                                                 |        |                      |        |    |       |  |  |   |      |      |
|--------|-------------------------------------------------|--------|----------------------|--------|----|-------|--|--|---|------|------|
| P54753 | Ephrin type-B receptor 3                        | EPHB3  | Cell surface protein | In 0hr | 2  | 6,67  |  |  | 1 | 0,00 | 0,00 |
| Q6V0I7 | Protocadherin Fat 4                             | FAT4   | Cell surface protein | In 0hr | 15 | 42,67 |  |  | 1 | 0,00 | 0,00 |
| P35555 | Fibrillin-1                                     | FBN1   | Cell surface protein | In 0hr | 6  | 22,67 |  |  | 1 | 0,00 | 0,00 |
| P21802 | Fibroblast growth factor receptor 2             | FGFR2  | Cell surface protein | In 0hr | 10 | 32,00 |  |  | 1 | 0,00 | 0,00 |
| P20930 | Filaggrin                                       | FLG    | Cell surface protein | In 0hr | 3  | 10,67 |  |  | 1 | 0,00 | 0,00 |
| P06241 | Tyrosine-protein kinase Fyn                     | FYN    | Cell surface protein | In 0hr | 3  | 8,00  |  |  | 1 | 0,00 | 0,00 |
| Q14332 | Frizzled-2                                      | FZD2   | Cell surface protein | In 0hr | 5  | 18,67 |  |  | 1 | 0,00 | 0,00 |
| Q10472 | Polypeptide N-acetylgalactosaminyltransferase 1 | GALNT1 | Cell surface protein | In 0hr | 4  | 13,33 |  |  | 1 | 0,00 | 0,00 |
| P16278 | Beta-galactosidase                              | GLB1   | Cell surface protein | In 0hr | 3  | 8,00  |  |  | 1 | 0,00 | 0,00 |
| O00461 | Golgi integral membrane protein 4               | GOLIM4 | Cell surface protein | In 0hr | 5  | 18,67 |  |  | 1 | 0,00 | 0,00 |
| Q8IWK6 | Probable G-protein coupled receptor 125         | GPR125 | Cell surface protein | In 0hr | 8  | 22,67 |  |  | 1 | 0,00 | 0,00 |
| Q9UMF0 | Intercellular adhesion molecule 5               | ICAM5  | Cell surface protein | In 0hr | 8  | 16,00 |  |  | 1 | 0,00 | 0,00 |
| P17181 | Interferon alpha/beta receptor 1                | IFNAR1 | Cell surface protein | In 0hr | 6  | 25,33 |  |  | 1 | 0,00 | 0,00 |
| P40189 | Interleukin-6 receptor subunit beta             | IL6ST  | Cell surface protein | In 0hr | 5  | 10,67 |  |  | 1 | 0,00 | 0,00 |
| Q9Y219 | Protein jagged-2                                | JAG2   | Cell surface protein | In 0hr | 6  | 20,00 |  |  | 1 | 0,00 | 0,00 |
| P24043 | Laminin subunit alpha-2                         | LAMA2  | Cell surface protein | In 0hr | 4  | 12,00 |  |  | 1 | 0,00 | 0,00 |



|        |                                                                |        |                      |        |    |       |  |  |   |      |      |
|--------|----------------------------------------------------------------|--------|----------------------|--------|----|-------|--|--|---|------|------|
| Q96JA1 | Leucine-rich repeats and immunoglobulin-like domains protein 1 | LRIG1  | Cell surface protein | In 0hr | 6  | 16,00 |  |  | 1 | 0,00 | 0,00 |
| O75197 | Low-density lipoprotein receptor-related protein 5             | LRP5   | Cell surface protein | In 0hr | 13 | 49,33 |  |  | 1 | 0,00 | 0,00 |
| O95274 | Ly6/PLAUR domain-containing protein 3                          | LYPD3  | Cell surface protein | In 0hr | 5  | 36,00 |  |  | 1 | 0,00 | 0,00 |
| P55082 | Microfibril-associated glycoprotein 3                          | MFAP3  | Cell surface protein | In 0hr | 3  | 8,00  |  |  | 1 | 0,00 | 0,00 |
| Q8NFZ4 | Neuroigin-2                                                    | NLGN2  | Cell surface protein | In 0hr | 4  | 9,33  |  |  | 1 | 0,00 | 0,00 |
| P46531 | Neurogenic locus notch homolog protein 1                       | NOTCH1 | Cell surface protein | In 0hr | 17 | 64,00 |  |  | 1 | 0,00 | 0,00 |
| O60462 | Neuropilin-2                                                   | NRP2   | Cell surface protein | In 0hr | 5  | 13,33 |  |  | 1 | 0,00 | 0,00 |
| P07602 | Prosaposin                                                     | PSAP   | Cell surface protein | In 0hr | 9  | 40,00 |  |  | 1 | 0,00 | 0,00 |
| Q92626 | Peroxidasin homolog                                            | PXDN   | Cell surface protein | In 0hr | 5  | 12,00 |  |  | 1 | 0,00 | 0,00 |
| Q6ZRP7 | Sulfhydryl oxidase 2                                           | QSOX2  | Cell surface protein | In 0hr | 17 | 80,00 |  |  | 1 | 0,00 | 0,00 |
| P61026 | Ras-related protein Rab-10                                     | RAB10  | Cell surface protein | In 0hr | 5  | 20,00 |  |  | 1 | 0,00 | 0,00 |
| Q5JTH9 | RRP12-like protein                                             | RRP12  | Cell surface protein | In 0hr | 4  | 10,67 |  |  | 1 | 0,00 | 0,00 |
| P34925 | Tyrosine-protein kinase RYK                                    | RYK    | Cell surface protein | In 0hr | 4  | 14,67 |  |  | 1 | 0,00 | 0,00 |
| Q6UWP8 | Suprabasin                                                     | SBSN   | Cell surface protein | In 0hr | 2  | 4,00  |  |  | 1 | 0,00 | 0,00 |
| Q9C0C4 | Semaphorin-4C                                                  | SEMA4C | Cell surface protein | In 0hr | 3  | 5,33  |  |  | 1 | 0,00 | 0,00 |
| Q8NFY4 | Semaphorin-6D                                                  | SEMA6D | Cell surface protein | In 0hr | 6  | 20,00 |  |  | 1 | 0,00 | 0,00 |

|        |                                                                                                                                                     |        |                      |        |    |       |  |  |   |      |      |
|--------|-----------------------------------------------------------------------------------------------------------------------------------------------------|--------|----------------------|--------|----|-------|--|--|---|------|------|
| B3KNK2 | cDNA FLJ14770 fis, clone NT2RP3004207, highly similar to Homo sapiens seizure related 6 homolog (mouse)-like 2 (SEZ6L2), transcript variant 1, mRNA | SEZ6L2 | Cell surface protein | In 0hr | 6  | 18,67 |  |  | 1 | 0,00 | 0,00 |
| Q5DT21 | Serine protease inhibitor Kazal-type 9                                                                                                              | SPINK9 | Cell surface protein | In 0hr | 2  | 9,33  |  |  | 1 | 0,00 | 0,00 |
| O43278 | Kunitz-type protease inhibitor 1                                                                                                                    | SPINT1 | Cell surface protein | In 0hr | 7  | 29,33 |  |  | 1 | 0,00 | 0,00 |
| Q03167 | Transforming growth factor beta receptor type 3                                                                                                     | TGFBR3 | Cell surface protein | In 0hr | 10 | 40,00 |  |  | 1 | 0,00 | 0,00 |
| Q96QT4 | Transient receptor potential cation channel subfamily M member 7                                                                                    | TRPM7  | Cell surface protein | In 0hr | 5  | 12,00 |  |  | 1 | 0,00 | 0,00 |
| Q9C0H2 | Protein tweety homolog 3                                                                                                                            | TTYH3  | Cell surface protein | In 0hr | 2  | 5,33  |  |  | 1 | 0,00 | 0,00 |
| Q06418 | Tyrosine-protein kinase receptor TYRO3                                                                                                              | TYRO3  | Cell surface protein | In 0hr | 12 | 48,00 |  |  | 1 | 0,00 | 0,00 |
| Q9NYU2 | UDP-glucose:glycoprotein glucosyltransferase 1                                                                                                      | UGGT1  | Cell surface protein | In 0hr | 5  | 9,33  |  |  | 1 | 0,00 | 0,00 |

**Table S6.** Proteins that changed by less than 25% in conditions B or C compared to A (static).

| UniProt Accession | Protein                                                           | Gene     | Cell Surface Proteins | Detection          | Total Peptides | NormSC-0hr | NormSC-16hr | NormSC-16hrCh | 0hr/0hr | 16hr/0hr | 16hrCh/0hr | (+)/(-) Chloroquine |
|-------------------|-------------------------------------------------------------------|----------|-----------------------|--------------------|----------------|------------|-------------|---------------|---------|----------|------------|---------------------|
| Q92508            | Piezo-type mechanosensitive ion channel component 1               | PIEZO1   | Cell surface protein  | In 0&16&16hr(+)&Ch | 83             | 196,00     | 149         | 147           | 1       | 0,76     | 0,75       | 0,99                |
| Q9Y639            | Neuroplastin                                                      | NPTN     | Cell surface protein  | In 0&16&16hr(+)&Ch | 50             | 165,33     | 156         | 126           | 1       | 0,94     | 0,76       | 0,81                |
| P54289            | Voltage-dependent calcium channel subunit alpha-2/delta-1         | CACNA2D1 | Cell surface protein  | In 0&16&16hr(+)&Ch | 90             | 177,33     | 141         | 136           | 1       | 0,80     | 0,77       | 0,96                |
| Q7L1W4            | Volume-regulated anion channel subunit LRRC8D                     | LRRC8D   | Cell surface protein  | In 0&16&16hr(+)&Ch | 93             | 93,33      | 86          | 76            | 1       | 0,92     | 0,81       | 0,88                |
| B5M450            | Solute carrier family 4 sodium bicarbonate cotransporter member 7 | SLC4A7   | Cell surface protein  | In 0&16&16hr(+)&Ch | 32             | 41,33      | 41          | 34            | 1       | 0,99     | 0,82       | 0,83                |
| P19256            | Lymphocyte function-associated antigen 3                          | CD58     | Cell surface protein  | In 0&16&16hr(+)&Ch | 9              | 24,00      | 20          | 20            | 1       | 0,83     | 0,83       | 1,00                |
| Q6P4Q7            | Metal transporter CNNM4                                           | CNNM4    | Cell surface protein  | In 0&16&16hr(+)&Ch | 92             | 122,67     | 116         | 105           | 1       | 0,95     | 0,86       | 0,91                |
| Q03135            | Caveolin-1                                                        | CAV1     | Cell surface protein  | In 0&16&16hr(+)&Ch | 15             | 34,67      | 28          | 32            | 1       | 0,81     | 0,92       | 1,14                |
| Q13501            | Sequestosome-1                                                    | SQSTM1   | Cell surface protein  | In 0&16&16hr(+)&Ch | 12             | 14,67      | 16          | 14            | 1       | 1,09     | 0,95       | 0,88                |
| P15941            | Mucin-1                                                           | MUC1     | Cell surface protein  | In 0&16&16hr(+)&Ch | 6              | 20,00      | 17          | 21            | 1       | 0,85     | 1,05       | 1,24                |
| Q687X5            | Metalloreductase STEAP4                                           | STEAP4   | Cell surface protein  | In 0&16&16hr(+)&Ch | 102            | 188,00     | 232         | 215           | 1       | 1,23     | 1,14       | 0,93                |

**Table S7.** Total proteins (negative controls included) detected in HeLa cells under three different conditions.

| Conditions | Labeling | UniProt<br>Accession | Protein                                                        | Gene     | Total<br>Peptides | %Seq<br>Coverage | Total<br>Spectra | NormSC |
|------------|----------|----------------------|----------------------------------------------------------------|----------|-------------------|------------------|------------------|--------|
| (A)0hr     | SEEL     | Q9BZC7               | ATP-binding cassette sub-family A member 2                     | ABCA2    | 15                | 7,76             | 37               | 49,33  |
| (A)0hr     | SEEL     | Q9NP58               | ATP-binding cassette sub-family B member 6                     | ABCB6    | 3                 | 5,46             | 5                | 6,67   |
| (A)0hr     | Control  | O75027               | ATP-binding cassette sub-family B member 7, mitochondrial      | ABCB7    | 5                 | 6,78             | 18               | 24,00  |
| (A)0hr     | SEEL     | P33527               | Multidrug resistance-associated protein 1                      | ABCC1    | 9                 | 7,97             | 19               | 25,33  |
| (A)0hr     | SEEL     | P33527               | Multidrug resistance-associated protein 1                      | ABCC1    | 31                | 26,91            | 100              | 133,33 |
| (A)0hr     | SEEL     | O15439               | Multidrug resistance-associated protein 4                      | ABCC4    | 21                | 15,85            | 53               | 70,67  |
| (A)0hr     | SEEL     | O15440               | Multidrug resistance-associated protein 5                      | ABCC5    | 7                 | 5,08             | 21               | 28,00  |
| (A)0hr     | SEEL     | P28288               | ATP-binding cassette sub-family D member 3                     | ABCD3    | 5                 | 5,46             | 8                | 10,67  |
| (A)0hr     | SEEL     | P61221               | ATP-binding cassette sub-family E member 1                     | ABCE1    | 22                | 36,89            | 139              | 185,33 |
| (A)0hr     | Control  | Q8NE71               | ATP-binding cassette sub-family F member 1                     | ABCF1    | 13                | 17,40            | 30               | 40,00  |
| (A)0hr     | Control  | Q13085               | Acetyl-CoA carboxylase 1                                       | ACACA    | 78                | 35,89            | 376              | 501,33 |
| (A)0hr     | Control  | Q13085               | Acetyl-CoA carboxylase 1                                       | ACACA    | 45                | 19,01            | 488              | 650,67 |
| (A)0hr     | Control  | Q13085               | Acetyl-CoA carboxylase 1                                       | ACACA    | 32                | 15,52            | 77               | 102,67 |
| (A)0hr     | SEEL     | Q13085               | Acetyl-CoA carboxylase 1                                       | ACACA    | 39                | 18,03            | 114              | 152,00 |
| (A)0hr     | SEEL     | Q13085               | Acetyl-CoA carboxylase 1                                       | ACACA    | 49                | 24,94            | 155              | 206,67 |
| (A)0hr     | Control  | O00763               | Acetyl-CoA carboxylase 2                                       | ACACB    | 2                 | 0,81             | 2                | 2,67   |
| (A)0hr     | SEEL     | Q9H845               | Acyl-CoA dehydrogenase family member 9, mitochondrial          | ACAD9    | 3                 | 4,83             | 6                | 8,00   |
| (A)0hr     | SEEL     | O95573               | Long-chain-fatty-acid--CoA ligase 3                            | ACSL3    | 3                 | 5,14             | 12               | 16,00  |
| (A)0hr     | SEEL     | O60488               | Long-chain-fatty-acid--CoA ligase 4                            | ACSL4    | 2                 | 3,23             | 4                | 5,33   |
| (A)0hr     | Control  | P60709               | Actin, cytoplasmic 1                                           | ACTB     | 3                 | 8,27             | 6                | 8,00   |
| (A)0hr     | SEEL     | P60709               | Actin, cytoplasmic 1                                           | ACTB     | 5                 | 16,53            | 13               | 17,33  |
| (A)0hr     | SEEL     | P60709               | Actin, cytoplasmic 1                                           | ACTB     | 3                 | 10,40            | 14               | 18,67  |
| (A)0hr     | SEEL     | P60709               | Actin, cytoplasmic 1                                           | ACTB     | 2                 | 5,33             | 7                | 9,33   |
| (A)0hr     | SEEL     | P60709               | Actin, cytoplasmic 1                                           | ACTB     | 8                 | 24,80            | 37               | 49,33  |
| (A)0hr     | SEEL     | Q04771               | Activin receptor type-1                                        | ACVR1    | 3                 | 6,09             | 5                | 6,67   |
| (A)0hr     | SEEL     | Q14672               | Disintegrin and metalloproteinase domain-containing protein 10 | ADAM10   | 10                | 15,64            | 29               | 38,67  |
| (A)0hr     | SEEL     | Q13444               | Disintegrin and metalloproteinase domain-containing protein 15 | ADAM15   | 8                 | 10,54            | 55               | 73,33  |
| (A)0hr     | SEEL     | Q13444               | Disintegrin and metalloproteinase domain-containing protein 15 | ADAM15   | 9                 | 10,78            | 55               | 73,33  |
| (A)0hr     | SEEL     | P78536               | Disintegrin and metalloproteinase domain-containing protein 17 | ADAM17   | 10                | 14,44            | 26               | 34,67  |
| (A)0hr     | SEEL     | Q13443               | Disintegrin and metalloproteinase domain-containing protein 9  | ADAM9    | 13                | 19,29            | 32               | 42,67  |
| (A)0hr     | SEEL     | P55265               | Double-stranded RNA-specific adenosine deaminase               | ADAR     | 2                 | 2,20             | 4                | 5,33   |
| (A)0hr     | SEEL     | O60503               | Adenylate cyclase type 9                                       | ADCY9    | 4                 | 3,47             | 7                | 9,33   |
| (A)0hr     | Control  | Q9Y4W6               | AFG3-like protein 2                                            | AFG3L2   | 3                 | 4,52             | 6                | 8,00   |
| (A)0hr     | SEEL     | Q9Y4W6               | AFG3-like protein 2                                            | AFG3L2   | 4                 | 4,77             | 8                | 10,67  |
| (A)0hr     | SEEL     | O00468               | Agurin                                                         | AGRN     | 46                | 26,75            | 218              | 290,67 |
| (A)0hr     | SEEL     | O00468               | Agurin                                                         | AGRN     | 15                | 9,00             | 41               | 54,67  |
| (A)0hr     | Control  | Q09666               | Neuroblast differentiation-associated protein AHNAK            | AHNAK    | 6                 | 1,48             | 35               | 46,67  |
| (A)0hr     | SEEL     | Q09666               | Neuroblast differentiation-associated protein AHNAK            | AHNAK    | 58                | 12,04            | 179              | 238,67 |
| (A)0hr     | SEEL     | Q09666               | Neuroblast differentiation-associated protein AHNAK            | AHNAK    | 6                 | 1,22             | 26               | 34,67  |
| (A)0hr     | SEEL     | Q09666               | Neuroblast differentiation-associated protein AHNAK            | AHNAK    | 5                 | 1,41             | 23               | 30,67  |
| (A)0hr     | SEEL     | Q8IVF2               | Protein AHNAK2                                                 | AHNAK2   | 5                 | 1,73             | 21               | 28,00  |
| (A)0hr     | SEEL     | P02765               | Alpha-2-HS-glycoprotein                                        | AHSG     | 2                 | 3,54             | 11               | 14,67  |
| (A)0hr     | Control  | O95831               | Apoptosis-inducing factor 1, mitochondrial                     | AIFM1    | 4                 | 7,01             | 8                | 10,67  |
| (A)0hr     | SEEL     | O95831               | Apoptosis-inducing factor 1, mitochondrial                     | AIFM1    | 4                 | 7,01             | 10               | 13,33  |
| (A)0hr     | Control  | Q02040               | A-kinase anchor protein 17A                                    | AKAP17A  | 17                | 20,29            | 64               | 85,33  |
| (A)0hr     | SEEL     | Q02040               | A-kinase anchor protein 17A                                    | AKAP17A  | 6                 | 8,35             | 10               | 13,33  |
| (A)0hr     | SEEL     | Q13740               | CD166 antigen                                                  | ALCAM    | 10                | 18,87            | 31               | 41,33  |
| (A)0hr     | SEEL     | Q13740               | CD166 antigen                                                  | ALCAM    | 33                | 54,55            | 429              | 572,00 |
| (A)0hr     | SEEL     | Q13740               | CD166 antigen                                                  | ALCAM    | 4                 | 9,09             | 7                | 9,33   |
| (A)0hr     | Control  | P54886               | Delta-1-pyrroline-5-carboxylate synthase                       | ALDH18A1 | 21                | 25,53            | 117              | 156,00 |
| (A)0hr     | SEEL     | P54886               | Delta-1-pyrroline-5-carboxylate synthase                       | ALDH18A1 | 16                | 22,39            | 47               | 62,67  |
| (A)0hr     | SEEL     | P09923               | Intestinal-type alkaline phosphatase                           | ALPI     | 5                 | 11,17            | 12               | 16,00  |
| (A)0hr     | SEEL     | P09923               | Intestinal-type alkaline phosphatase                           | ALPI     | 12                | 25,95            | 69               | 92,00  |
| (A)0hr     | SEEL     | P09923               | Intestinal-type alkaline phosphatase                           | ALPI     | 9                 | 18,18            | 37               | 49,33  |
| (A)0hr     | SEEL     | P09923               | Intestinal-type alkaline phosphatase                           | ALPI     | 20                | 50,00            | 414              | 552,00 |
| (A)0hr     | SEEL     | P05187               | Alkaline phosphatase, placental type                           | ALPP     | 6                 | 16,26            | 23               | 30,67  |
| (A)0hr     | SEEL     | P05187               | Alkaline phosphatase, placental type                           | ALPP     | 4                 | 11,40            | 7                | 9,33   |
| (A)0hr     | SEEL     | P05187               | Alkaline phosphatase, placental type                           | ALPP     | 3                 | 3,74             | 39               | 52,00  |
| (A)0hr     | SEEL     | P10696               | Alkaline phosphatase, placental-like                           | ALPPL2   | 2                 | 7,14             | 8                | 10,67  |
| (A)0hr     | SEEL     | Q9HCJ1               | Progressive ankylosis protein homolog                          | ANKH     | 7                 | 13,82            | 23               | 30,67  |
| (A)0hr     | SEEL     | Q9HCJ1               | Progressive ankylosis protein homolog                          | ANKH     | 3                 | 7,11             | 8                | 10,67  |
| (A)0hr     | SEEL     | P15144               | Aminopeptidase N                                               | ANPEP    | 15                | 15,51            | 37               | 49,33  |
| (A)0hr     | SEEL     | Q9H6X2               | Anthrax toxin receptor 1                                       | ANTXR1   | 6                 | 10,28            | 16               | 21,33  |

|        |         |            |                                                                                                                        |          |    |       |     |        |
|--------|---------|------------|------------------------------------------------------------------------------------------------------------------------|----------|----|-------|-----|--------|
| (A)0hr | SEEL    | P08133     | Annexin A6                                                                                                             | ANXA6    | 7  | 12,18 | 16  | 21,33  |
| (A)0hr | SEEL    | B5ME49     | AP-1 complex subunit mu-1                                                                                              | AP1M1    | 2  | 0,18  | 14  | 18,67  |
| (A)0hr | SEEL    | O94973     | AP-2 complex subunit alpha-2                                                                                           | AP2A2    | 3  | 4,79  | 6   | 8,00   |
| (A)0hr | Control | O14617     | AP-3 complex subunit delta-1                                                                                           | AP3D1    | 13 | 12,40 | 49  | 65,33  |
| (A)0hr | SEEL    | O14617     | AP-3 complex subunit delta-1                                                                                           | AP3D1    | 3  | 2,86  | 7   | 9,33   |
| (A)0hr | Control | A0A024RDY9 | Rho guanine nucleotide exchange factor (GEF) 7, isoform CRA_b                                                          | ARHGEF7  | 10 | 12,85 | 28  | 37,33  |
| (A)0hr | Control | A0A024RDY9 | Rho guanine nucleotide exchange factor (GEF) 7, isoform CRA_b                                                          | ARHGEF7  | 10 | 11,61 | 53  | 70,67  |
| (A)0hr | Control | A0A024RDY9 | Rho guanine nucleotide exchange factor (GEF) 7, isoform CRA_b                                                          | ARHGEF7  | 9  | 12,54 | 19  | 25,33  |
| (A)0hr | Control | Q9NV17     | ATPase family AAA domain-containing protein 3A                                                                         | ATAD3A   | 6  | 9,15  | 12  | 16,00  |
| (A)0hr | Control | Q13315     | Serine-protein kinase ATM                                                                                              | ATM      | 4  | 2,65  | 13  | 17,33  |
| (A)0hr | Control | P05023     | Sodium/potassium-transporting ATPase subunit alpha-1                                                                   | ATP1A1   | 9  | 8,41  | 17  | 22,67  |
| (A)0hr | SEEL    | P05023     | Sodium/potassium-transporting ATPase subunit alpha-1                                                                   | ATP1A1   | 7  | 6,26  | 35  | 46,67  |
| (A)0hr | SEEL    | P05023     | Sodium/potassium-transporting ATPase subunit alpha-1                                                                   | ATP1A1   | 38 | 32,65 | 424 | 565,33 |
| (A)0hr | SEEL    | P05023     | Sodium/potassium-transporting ATPase subunit alpha-1                                                                   | ATP1A1   | 38 | 32,65 | 587 | 782,67 |
| (A)0hr | SEEL    | P05023     | Sodium/potassium-transporting ATPase subunit alpha-1                                                                   | ATP1A1   | 13 | 13,98 | 46  | 61,33  |
| (A)0hr | SEEL    | B3KW93     | cDNA FL42590 fis, clone BRACE3009708, highly similar to Sodium/potassium-transporting ATPase alpha-2chain (EC 3.6.3.9) | ATP1A2   | 2  | 2,17  | 7   | 9,33   |
| (A)0hr | SEEL    | B3KW93     | cDNA FL42590 fis, clone BRACE3009708, highly similar to Sodium/potassium-transporting ATPase alpha-2chain (EC 3.6.3.9) | ATP1A2   | 2  | 2,17  | 7   | 9,33   |
| (A)0hr | SEEL    | P13637     | Sodium/potassium-transporting ATPase subunit alpha-3                                                                   | ATP1A3   | 2  | 1,97  | 27  | 36,00  |
| (A)0hr | SEEL    | P05026     | Sodium/potassium-transporting ATPase subunit beta-1                                                                    | ATP1B1   | 7  | 22,77 | 62  | 82,67  |
| (A)0hr | SEEL    | P05026     | Sodium/potassium-transporting ATPase subunit beta-1                                                                    | ATP1B1   | 7  | 22,77 | 31  | 41,33  |
| (A)0hr | SEEL    | P54709     | Sodium/potassium-transporting ATPase subunit beta-3                                                                    | ATP1B3   | 5  | 21,86 | 43  | 57,33  |
| (A)0hr | Control | P16615     | Sarcoplasmic/endoplasmic reticulum calcium ATPase 2                                                                    | ATP2A2   | 5  | 5,66  | 10  | 13,33  |
| (A)0hr | Control | P16615     | Sarcoplasmic/endoplasmic reticulum calcium ATPase 2                                                                    | ATP2A2   | 16 | 15,45 | 70  | 93,33  |
| (A)0hr | SEEL    | P16615     | Sarcoplasmic/endoplasmic reticulum calcium ATPase 2                                                                    | ATP2A2   | 4  | 5,28  | 6   | 8,00   |
| (A)0hr | SEEL    | P16615     | Sarcoplasmic/endoplasmic reticulum calcium ATPase 2                                                                    | ATP2A2   | 5  | 5,57  | 14  | 18,67  |
| (A)0hr | SEEL    | P16615     | Sarcoplasmic/endoplasmic reticulum calcium ATPase 2                                                                    | ATP2A2   | 10 | 10,94 | 29  | 38,67  |
| (A)0hr | Control | P20020     | Plasma membrane calcium-transporting ATPase 1                                                                          | ATP2B1   | 6  | 5,48  | 13  | 17,33  |
| (A)0hr | SEEL    | P20020     | Plasma membrane calcium-transporting ATPase 1                                                                          | ATP2B1   | 13 | 13,75 | 34  | 45,33  |
| (A)0hr | SEEL    | P20020     | Plasma membrane calcium-transporting ATPase 1                                                                          | ATP2B1   | 9  | 10,17 | 31  | 41,33  |
| (A)0hr | SEEL    | O75882     | Attractin                                                                                                              | ATRN     | 5  | 3,71  | 12  | 16,00  |
| (A)0hr | SEEL    | O75882     | Attractin                                                                                                              | ATRN     | 22 | 18,68 | 122 | 162,67 |
| (A)0hr | SEEL    | P30530     | Tyrosine-protein kinase receptor UFO                                                                                   | AXL      | 4  | 5,15  | 9   | 12,00  |
| (A)0hr | SEEL    | P30530     | Tyrosine-protein kinase receptor UFO                                                                                   | AXL      | 7  | 9,28  | 22  | 29,33  |
| (A)0hr | SEEL    | P30530     | Tyrosine-protein kinase receptor UFO                                                                                   | AXL      | 5  | 5,93  | 14  | 18,67  |
| (A)0hr | SEEL    | Q9Y520     | Beta-secretase 2                                                                                                       | BACE2    | 6  | 14,29 | 17  | 22,67  |
| (A)0hr | SEEL    | A0A068W6H0 | Basal cell adhesion molecule (Lutheran blood group)                                                                    | BCAM     | 8  | 19,11 | 20  | 26,67  |
| (A)0hr | SEEL    | P50895     | Basal cell adhesion molecule                                                                                           | BCAM     | 23 | 42,68 | 195 | 260,00 |
| (A)0hr | SEEL    | P50895     | Basal cell adhesion molecule                                                                                           | BCAM     | 7  | 14,33 | 27  | 36,00  |
| (A)0hr | SEEL    | P51587     | Breast cancer type 2 susceptibility protein                                                                            | BRCA2    | 5  | 1,96  | 10  | 13,33  |
| (A)0hr | SEEL    | P35613     | Basigin                                                                                                                | BSG      | 6  | 16,88 | 24  | 32,00  |
| (A)0hr | SEEL    | P35613     | Basigin                                                                                                                | BSG      | 7  | 21,56 | 29  | 38,67  |
| (A)0hr | SEEL    | P35613     | Basigin                                                                                                                | BSG      | 12 | 37,40 | 544 | 725,33 |
| (A)0hr | SEEL    | Q10589     | Bone marrow stromal antigen 2                                                                                          | BST2     | 2  | 13,89 | 6   | 8,00   |
| (A)0hr | SEEL    | Q10589     | Bone marrow stromal antigen 2                                                                                          | BST2     | 2  | 13,89 | 10  | 13,33  |
| (A)0hr | SEEL    | Q7KYR7     | Butyrophilin subfamily 2 member A1                                                                                     | BTN2A1   | 18 | 32,45 | 103 | 137,33 |
| (A)0hr | Control | Q9H8G2     | Caspase activity and apoptosis inhibitor 1                                                                             | CAAP1    | 6  | 18,28 | 25  | 33,33  |
| (A)0hr | SEEL    | Q9H8G2     | Caspase activity and apoptosis inhibitor 1                                                                             | CAAP1    | 3  | 10,80 | 8   | 10,67  |
| (A)0hr | SEEL    | Q5VU97     | VWFA and cache domain-containing protein 1                                                                             | CACHD1   | 15 | 10,36 | 38  | 50,67  |
| (A)0hr | SEEL    | P54289     | Voltage-dependent calcium channel subunit alpha-2/delta-1                                                              | CACNA2D1 | 30 | 32,91 | 133 | 177,33 |
| (A)0hr | Control | P27708     | CAD protein                                                                                                            | CAD      | 4  | 2,11  | 8   | 10,67  |
| (A)0hr | SEEL    | Q9BY67     | Cell adhesion molecule 1                                                                                               | CADM1    | 10 | 29,64 | 53  | 70,67  |
| (A)0hr | SEEL    | Q8NFX8     | Cell adhesion molecule 4                                                                                               | CADM4    | 7  | 25,00 | 29  | 38,67  |
| (A)0hr | SEEL    | Q03135     | Caveolin-1                                                                                                             | CAV1     | 5  | 35,39 | 26  | 34,67  |
| (A)0hr | Control | P49368     | T-complex protein 1 subunit gamma                                                                                      | CCT3     | 8  | 17,43 | 12  | 16,00  |
| (A)0hr | SEEL    | P49368     | T-complex protein 1 subunit gamma                                                                                      | CCT3     | 7  | 13,58 | 17  | 22,67  |
| (A)0hr | Control | P50991     | T-complex protein 1 subunit delta                                                                                      | CCT4     | 5  | 8,72  | 9   | 12,00  |
| (A)0hr | SEEL    | P48643     | T-complex protein 1 subunit epsilon                                                                                    | CCT5     | 2  | 4,81  | 5   | 6,67   |
| (A)0hr | Control | P40227     | T-complex protein 1 subunit zeta                                                                                       | CCT6A    | 5  | 9,23  | 11  | 14,67  |
| (A)0hr | SEEL    | P40227     | T-complex protein 1 subunit zeta                                                                                       | CCT6A    | 5  | 8,85  | 14  | 18,67  |
| (A)0hr | Control | P50990     | T-complex protein 1 subunit theta                                                                                      | CCT8     | 7  | 12,96 | 16  | 21,33  |
| (A)0hr | SEEL    | P50990     | T-complex protein 1 subunit theta                                                                                      | CCT8     | 8  | 16,24 | 19  | 25,33  |
| (A)0hr | SEEL    | Q6YHK3     | CD109 antigen                                                                                                          | CD109    | 27 | 22,63 | 113 | 150,67 |
| (A)0hr | SEEL    | Q6YHK3     | CD109 antigen                                                                                                          | CD109    | 15 | 11,70 | 46  | 61,33  |
| (A)0hr | SEEL    | Q6YHK3     | CD109 antigen                                                                                                          | CD109    | 7  | 5,54  | 25  | 33,33  |
| (A)0hr | SEEL    | P48509     | CD151 antigen                                                                                                          | CD151    | 5  | 16,60 | 25  | 33,33  |

|        |         |        |                                                                         |         |    |       |     |        |
|--------|---------|--------|-------------------------------------------------------------------------|---------|----|-------|-----|--------|
| (A)0hr | SEEL    | P48509 | CD151 antigen                                                           | CD151   | 5  | 16,21 | 29  | 38,67  |
| (A)0hr | SEEL    | Q5ZPR3 | CD276 antigen                                                           | CD276   | 8  | 21,91 | 42  | 56,00  |
| (A)0hr | SEEL    | Q5ZPR3 | CD276 antigen                                                           | CD276   | 8  | 21,16 | 379 | 505,33 |
| (A)0hr | SEEL    | Q5ZPR3 | CD276 antigen                                                           | CD276   | 8  | 23,41 | 65  | 86,67  |
| (A)0hr | SEEL    | Q9NPF0 | CD320 antigen                                                           | CD320   | 3  | 10,28 | 20  | 26,67  |
| (A)0hr | SEEL    | P16070 | CD44 antigen                                                            | CD44    | 9  | 11,73 | 57  | 76,00  |
| (A)0hr | SEEL    | P16070 | CD44 antigen                                                            | CD44    | 10 | 14,96 | 217 | 289,33 |
| (A)0hr | SEEL    | P16070 | CD44 antigen                                                            | CD44    | 12 | 17,52 | 325 | 433,33 |
| (A)0hr | SEEL    | P16070 | CD44 antigen                                                            | CD44    | 10 | 14,96 | 90  | 120,00 |
| (A)0hr | SEEL    | P15529 | Membrane cofactor protein                                               | CD46    | 4  | 10,46 | 15  | 20,00  |
| (A)0hr | SEEL    | P15529 | Membrane cofactor protein                                               | CD46    | 11 | 22,45 | 220 | 293,33 |
| (A)0hr | SEEL    | R4GN18 | Membrane cofactor protein (Fragment)                                    | CD46    | 2  | 19,23 | 50  | 66,67  |
| (A)0hr | SEEL    | Q08722 | Leukocyte surface antigen CD47                                          | CD47    | 3  | 8,67  | 24  | 32,00  |
| (A)0hr | SEEL    | P08174 | Complement decay-accelerating factor                                    | CD55    | 12 | 30,71 | 65  | 86,67  |
| (A)0hr | SEEL    | P08174 | Complement decay-accelerating factor                                    | CD55    | 8  | 22,31 | 36  | 48,00  |
| (A)0hr | SEEL    | P08174 | Complement decay-accelerating factor                                    | CD55    | 17 | 41,99 | 375 | 500,00 |
| (A)0hr | SEEL    | P19256 | Lymphocyte function-associated antigen 3                                | CD58    | 3  | 8,00  | 18  | 24,00  |
| (A)0hr | SEEL    | P48960 | CD97 antigen                                                            | CD97    | 7  | 8,02  | 74  | 98,67  |
| (A)0hr | SEEL    | P48960 | CD97 antigen                                                            | CD97    | 12 | 14,49 | 60  | 80,00  |
| (A)0hr | SEEL    | P48960 | CD97 antigen                                                            | CD97    | 18 | 24,31 | 234 | 312,00 |
| (A)0hr | SEEL    | P48960 | CD97 antigen                                                            | CD97    | 16 | 23,71 | 191 | 254,67 |
| (A)0hr | SEEL    | P19022 | Cadherin-2                                                              | CDH2    | 9  | 19,65 | 16  | 21,33  |
| (A)0hr | SEEL    | P19022 | Cadherin-2                                                              | CDH2    | 20 | 33,33 | 141 | 188,00 |
| (A)0hr | SEEL    | P19022 | Cadherin-2                                                              | CDH2    | 3  | 5,52  | 4   | 5,33   |
| (A)0hr | SEEL    | P33151 | Cadherin-5                                                              | CDH5    | 5  | 7,14  | 12  | 16,00  |
| (A)0hr | SEEL    | P33151 | Cadherin-5                                                              | CDH5    | 17 | 21,94 | 122 | 162,67 |
| (A)0hr | SEEL    | P33151 | Cadherin-5                                                              | CDH5    | 3  | 2,68  | 11  | 14,67  |
| (A)0hr | Control | P21127 | Cyclin-dependent kinase 11B                                             | CDK11B  | 8  | 9,81  | 15  | 20,00  |
| (A)0hr | SEEL    | Q9NYQ6 | Cadherin EGF LAG seven-pass G-type receptor 1                           | CELSR1  | 13 | 5,61  | 37  | 49,33  |
| (A)0hr | SEEL    | Q9NYQ6 | Cadherin EGF LAG seven-pass G-type receptor 1                           | CELSR1  | 22 | 9,62  | 100 | 133,33 |
| (A)0hr | SEEL    | Q9NYQ6 | Cadherin EGF LAG seven-pass G-type receptor 1                           | CELSR1  | 4  | 1,46  | 15  | 20,00  |
| (A)0hr | SEEL    | Q9HCU4 | Cadherin EGF LAG seven-pass G-type receptor 2                           | CELSR2  | 20 | 8,69  | 65  | 86,67  |
| (A)0hr | SEEL    | Q07065 | Cytoskeleton-associated protein 4                                       | CKAP4   | 2  | 4,98  | 3   | 4,00   |
| (A)0hr | SEEL    | O76031 | ATP-dependent Clp protease ATP-binding subunit clpX-like, mitochondrial | CLPX    | 8  | 15,96 | 20  | 26,67  |
| (A)0hr | Control | Q00610 | Clathrin heavy chain 1                                                  | CLTC    | 23 | 15,16 | 64  | 85,33  |
| (A)0hr | SEEL    | Q00610 | Clathrin heavy chain 1                                                  | CLTC    | 25 | 17,73 | 61  | 81,33  |
| (A)0hr | SEEL    | Q9NRU3 | Metal transporter CNNM1                                                 | CNNM1   | 2  | 2,42  | 3   | 4,00   |
| (A)0hr | SEEL    | Q9H8M5 | Metal transporter CNNM2                                                 | CNNM2   | 12 | 13,26 | 45  | 60,00  |
| (A)0hr | SEEL    | Q9H8M5 | Metal transporter CNNM2                                                 | CNNM2   | 17 | 20,46 | 53  | 70,67  |
| (A)0hr | SEEL    | Q9H8M5 | Metal transporter CNNM2                                                 | CNNM2   | 3  | 3,77  | 6   | 8,00   |
| (A)0hr | SEEL    | Q8NE01 | Metal transporter CNNM3                                                 | CNNM3   | 2  | 2,40  | 6   | 8,00   |
| (A)0hr | SEEL    | Q8NE01 | Metal transporter CNNM3                                                 | CNNM3   | 23 | 38,61 | 98  | 130,67 |
| (A)0hr | SEEL    | Q8NE01 | Metal transporter CNNM3                                                 | CNNM3   | 4  | 7,21  | 8   | 10,67  |
| (A)0hr | SEEL    | Q6P4Q7 | Metal transporter CNNM4                                                 | CNNM4   | 10 | 14,06 | 27  | 36,00  |
| (A)0hr | SEEL    | Q6P4Q7 | Metal transporter CNNM4                                                 | CNNM4   | 9  | 12,52 | 24  | 32,00  |
| (A)0hr | SEEL    | Q6P4Q7 | Metal transporter CNNM4                                                 | CNNM4   | 12 | 17,16 | 41  | 54,67  |
| (A)0hr | SEEL    | Q99715 | Collagen alpha-1(XII) chain                                             | COL12A1 | 51 | 20,60 | 166 | 221,33 |
| (A)0hr | SEEL    | Q99715 | Collagen alpha-1(XII) chain                                             | COL12A1 | 16 | 6,89  | 29  | 38,67  |
| (A)0hr | Control | P53621 | Coatamer subunit alpha                                                  | COPA    | 22 | 18,63 | 54  | 72,00  |
| (A)0hr | SEEL    | P53621 | Coatamer subunit alpha                                                  | COPA    | 6  | 5,47  | 11  | 14,67  |
| (A)0hr | Control | P53618 | Coatamer subunit beta                                                   | COPB1   | 4  | 5,25  | 6   | 8,00   |
| (A)0hr | Control | Q9Y678 | Coatamer subunit gamma-1                                                | COPG1   | 4  | 4,58  | 6   | 8,00   |
| (A)0hr | SEEL    | O75976 | Carboxypeptidase D                                                      | CPD     | 23 | 18,70 | 66  | 88,00  |
| (A)0hr | SEEL    | P14384 | Carboxypeptidase M                                                      | CPM     | 2  | 3,84  | 7   | 9,33   |
| (A)0hr | Control | Q99829 | Copine-1                                                                | CPNE1   | 8  | 13,97 | 33  | 44,00  |
| (A)0hr | SEEL    | Q99829 | Copine-1                                                                | CPNE1   | 7  | 14,34 | 27  | 36,00  |
| (A)0hr | SEEL    | O75131 | Copine-3                                                                | CPNE3   | 5  | 8,19  | 10  | 13,33  |
| (A)0hr | Control | P31327 | Carbamoyl-phosphate synthase [ammonia], mitochondrial                   | CPS1    | 4  | 2,73  | 10  | 13,33  |
| (A)0hr | Control | P31327 | Carbamoyl-phosphate synthase [ammonia], mitochondrial                   | CPS1    | 70 | 49,07 | 732 | 976,00 |
| (A)0hr | Control | P31327 | Carbamoyl-phosphate synthase [ammonia], mitochondrial                   | CPS1    | 25 | 17,73 | 82  | 109,33 |
| (A)0hr | SEEL    | P31327 | Carbamoyl-phosphate synthase [ammonia], mitochondrial                   | CPS1    | 18 | 12,67 | 44  | 58,67  |
| (A)0hr | SEEL    | P31327 | Carbamoyl-phosphate synthase [ammonia], mitochondrial                   | CPS1    | 79 | 58,80 | 656 | 874,67 |
| (A)0hr | SEEL    | P31327 | Carbamoyl-phosphate synthase [ammonia], mitochondrial                   | CPS1    | 19 | 16,80 | 44  | 58,67  |
| (A)0hr | SEEL    | P31327 | Carbamoyl-phosphate synthase [ammonia], mitochondrial                   | CPS1    | 3  | 2,47  | 5   | 6,67   |
| (A)0hr | Control | P50416 | Carnitine O-palmitoyltransferase 1, liver isoform                       | CPT1A   | 10 | 14,62 | 28  | 37,33  |
| (A)0hr | SEEL    | P50416 | Carnitine O-palmitoyltransferase 1, liver isoform                       | CPT1A   | 11 | 15,65 | 22  | 29,33  |

|        |         |        |                                                                                                                  |         |    |       |     |        |
|--------|---------|--------|------------------------------------------------------------------------------------------------------------------|---------|----|-------|-----|--------|
| (A)0hr | Control | Q9BZJ0 | Crooked neck-like protein 1                                                                                      | CRNKL1  | 2  | 2,59  | 4   | 5,33   |
| (A)0hr | SEEL    | P15509 | Granulocyte-macrophage colony-stimulating factor receptor subunit alpha                                          | CSF2RA  | 8  | 26,25 | 49  | 65,33  |
| (A)0hr | SEEL    | Q6UVK1 | Chondroitin sulfate proteoglycan 4                                                                               | CSPG4   | 67 | 37,90 | 517 | 689,33 |
| (A)0hr | SEEL    | Q6UVK1 | Chondroitin sulfate proteoglycan 4                                                                               | CSPG4   | 72 | 39,02 | 670 | 893,33 |
| (A)0hr | SEEL    | Q6UVK1 | Chondroitin sulfate proteoglycan 4                                                                               | CSPG4   | 11 | 5,90  | 29  | 38,67  |
| (A)0hr | SEEL    | Q6UVK1 | Chondroitin sulfate proteoglycan 4                                                                               | CSPG4   | 3  | 1,42  | 6   | 8,00   |
| (A)0hr | SEEL    | P35221 | Catenin alpha-1                                                                                                  | CTNNA1  | 12 | 16,23 | 34  | 45,33  |
| (A)0hr | SEEL    | P35222 | Catenin beta-1                                                                                                   | CTNNB1  | 24 | 40,08 | 177 | 236,00 |
| (A)0hr | SEEL    | P35222 | Catenin beta-1                                                                                                   | CTNNB1  | 7  | 11,14 | 22  | 29,33  |
| (A)0hr | Control | Q13619 | Cullin-4A                                                                                                        | CUL4A   | 2  | 3,03  | 4   | 5,33   |
| (A)0hr | SEEL    | P61073 | C-X-C chemokine receptor type 4                                                                                  | CXCR4   | 6  | 18,18 | 27  | 36,00  |
| (A)0hr | SEEL    | P61073 | C-X-C chemokine receptor type 4                                                                                  | CXCR4   | 5  | 15,06 | 32  | 42,67  |
| (A)0hr | SEEL    | P61073 | C-X-C chemokine receptor type 4                                                                                  | CXCR4   | 4  | 11,93 | 17  | 22,67  |
| (A)0hr | SEEL    | P61073 | C-X-C chemokine receptor type 4                                                                                  | CXCR4   | 3  | 8,81  | 13  | 17,33  |
| (A)0hr | SEEL    | Q14118 | Dystroglycan                                                                                                     | DAG1    | 14 | 14,41 | 181 | 241,33 |
| (A)0hr | SEEL    | Q14118 | Dystroglycan                                                                                                     | DAG1    | 11 | 10,28 | 103 | 137,33 |
| (A)0hr | Control | P11182 | Lipoamide acyltransferase component of branched-chain alpha-keto acid dehydrogenase complex, mitochondrial       | DBT     | 7  | 12,86 | 20  | 26,67  |
| (A)0hr | Control | P11182 | Lipoamide acyltransferase component of branched-chain alpha-keto acid dehydrogenase complex, mitochondrial       | DBT     | 3  | 6,22  | 7   | 9,33   |
| (A)0hr | SEEL    | P81605 | Dermcidin                                                                                                        | DCD     | 3  | 22,73 | 11  | 14,67  |
| (A)0hr | SEEL    | Q08345 | Epithelial discoidin domain-containing receptor 1                                                                | DDR1    | 6  | 6,24  | 9   | 12,00  |
| (A)0hr | SEEL    | Q16832 | Discoidin domain-containing receptor 2                                                                           | DDR2    | 15 | 21,75 | 67  | 89,33  |
| (A)0hr | SEEL    | Q16832 | Discoidin domain-containing receptor 2                                                                           | DDR2    | 4  | 5,61  | 10  | 13,33  |
| (A)0hr | Control | Q92499 | ATP-dependent RNA helicase DDX1                                                                                  | DDX1    | 3  | 4,05  | 5   | 6,67   |
| (A)0hr | SEEL    | Q92499 | ATP-dependent RNA helicase DDX1                                                                                  | DDX1    | 3  | 5,14  | 4   | 5,33   |
| (A)0hr | SEEL    | Q92841 | Probable ATP-dependent RNA helicase DDX17                                                                        | DDX17   | 7  | 10,56 | 21  | 28,00  |
| (A)0hr | Control | Q9NR30 | Nucleolar RNA helicase 2                                                                                         | DDX21   | 15 | 19,80 | 52  | 69,33  |
| (A)0hr | SEEL    | Q9NR30 | Nucleolar RNA helicase 2                                                                                         | DDX21   | 16 | 27,20 | 44  | 58,67  |
| (A)0hr | Control | Q9BUQ8 | Probable ATP-dependent RNA helicase DDX23                                                                        | DDX23   | 12 | 14,76 | 40  | 53,33  |
| (A)0hr | SEEL    | Q9BUQ8 | Probable ATP-dependent RNA helicase DDX23                                                                        | DDX23   | 6  | 7,56  | 11  | 14,67  |
| (A)0hr | Control | B4DKV2 | cDNA FLJ54363, highly similar to ATP-dependent RNA helicase DDX24 (EC 3.6.1.-)                                   | DDX24   | 7  | 11,88 | 17  | 22,67  |
| (A)0hr | SEEL    | Q9GZR7 | ATP-dependent RNA helicase DDX24                                                                                 | DDX24   | 5  | 7,80  | 13  | 17,33  |
| (A)0hr | Control | O00571 | ATP-dependent RNA helicase DDX3X                                                                                 | DDX3X   | 14 | 22,36 | 36  | 48,00  |
| (A)0hr | Control | O00571 | ATP-dependent RNA helicase DDX3X                                                                                 | DDX3X   | 15 | 23,87 | 41  | 54,67  |
| (A)0hr | SEEL    | O00571 | ATP-dependent RNA helicase DDX3X                                                                                 | DDX3X   | 8  | 13,75 | 17  | 22,67  |
| (A)0hr | SEEL    | O00571 | ATP-dependent RNA helicase DDX3X                                                                                 | DDX3X   | 20 | 32,33 | 86  | 114,67 |
| (A)0hr | Control | P17844 | Probable ATP-dependent RNA helicase DDX5                                                                         | DDX5    | 17 | 23,62 | 64  | 85,33  |
| (A)0hr | SEEL    | P17844 | Probable ATP-dependent RNA helicase DDX5                                                                         | DDX5    | 18 | 24,43 | 111 | 148,00 |
| (A)0hr | Control | Q8TDD1 | ATP-dependent RNA helicase DDX54                                                                                 | DDX54   | 6  | 7,38  | 9   | 12,00  |
| (A)0hr | Control | O43143 | Putative pre-mRNA-splicing factor ATP-dependent RNA helicase DHX15                                               | DHX15   | 5  | 6,04  | 14  | 18,67  |
| (A)0hr | Control | Q7L2E3 | Putative ATP-dependent RNA helicase DHX30                                                                        | DHX30   | 4  | 3,27  | 5   | 6,67   |
| (A)0hr | SEEL    | Q7L2E3 | Putative ATP-dependent RNA helicase DHX30                                                                        | DHX30   | 3  | 2,43  | 5   | 6,67   |
| (A)0hr | Control | Q08211 | ATP-dependent RNA helicase A                                                                                     | DHX9    | 29 | 24,17 | 114 | 152,00 |
| (A)0hr | Control | Q08211 | ATP-dependent RNA helicase A                                                                                     | DHX9    | 4  | 3,86  | 6   | 8,00   |
| (A)0hr | SEEL    | Q08211 | ATP-dependent RNA helicase A                                                                                     | DHX9    | 25 | 19,84 | 88  | 117,33 |
| (A)0hr | Control | B4DJX1 | Acetyltransferase component of pyruvate dehydrogenase complex                                                    | DLAT    | 17 | 32,83 | 114 | 152,00 |
| (A)0hr | Control | P10515 | Dihydrolipoyllysine-residue acetyltransferase component of pyruvate dehydrogenase complex, mitochondrial         | DLAT    | 6  | 8,35  | 24  | 32,00  |
| (A)0hr | Control | P10515 | Dihydrolipoyllysine-residue acetyltransferase component of pyruvate dehydrogenase complex, mitochondrial         | DLAT    | 7  | 10,97 | 67  | 89,33  |
| (A)0hr | Control | P10515 | Dihydrolipoyllysine-residue acetyltransferase component of pyruvate dehydrogenase complex, mitochondrial         | DLAT    | 11 | 19,32 | 275 | 366,67 |
| (A)0hr | SEEL    | P10515 | Dihydrolipoyllysine-residue acetyltransferase component of pyruvate dehydrogenase complex, mitochondrial         | DLAT    | 5  | 8,19  | 10  | 13,33  |
| (A)0hr | Control | P09622 | Dihydrolipoyl dehydrogenase, mitochondrial                                                                       | DLD     | 6  | 11,98 | 16  | 21,33  |
| (A)0hr | Control | P09622 | Dihydrolipoyl dehydrogenase, mitochondrial                                                                       | DLD     | 6  | 11,98 | 21  | 28,00  |
| (A)0hr | Control | P09622 | Dihydrolipoyl dehydrogenase, mitochondrial                                                                       | DLD     | 22 | 36,54 | 273 | 364,00 |
| (A)0hr | Control | P36957 | Dihydrolipoyllysine-residue succinyltransferase component of 2-oxoglutarate dehydrogenase complex, mitochondrial | DLST    | 7  | 14,79 | 28  | 37,33  |
| (A)0hr | Control | P36957 | Dihydrolipoyllysine-residue succinyltransferase component of 2-oxoglutarate dehydrogenase complex, mitochondrial | DLST    | 8  | 17,44 | 29  | 38,67  |
| (A)0hr | Control | P36957 | Dihydrolipoyllysine-residue succinyltransferase component of 2-oxoglutarate dehydrogenase complex, mitochondrial | DLST    | 7  | 14,79 | 30  | 40,00  |
| (A)0hr | SEEL    | Q9NVH1 | DnaJ homolog subfamily C member 11                                                                               | DNAJC11 | 5  | 9,48  | 14  | 18,67  |
| (A)0hr | SEEL    | Q08554 | Desmocollin-1                                                                                                    | DSC1    | 4  | 5,82  | 17  | 22,67  |
| (A)0hr | SEEL    | Q02487 | Desmocollin-2                                                                                                    | DSC2    | 10 | 12,87 | 35  | 46,67  |
| (A)0hr | SEEL    | Q14574 | Desmocollin-3                                                                                                    | DSC3    | 8  | 11,83 | 25  | 33,33  |
| (A)0hr | SEEL    | Q02413 | Desmoglein-1                                                                                                     | DSG1    | 10 | 12,30 | 28  | 37,33  |
| (A)0hr | SEEL    | Q14126 | Desmoglein-2                                                                                                     | DSG2    | 7  | 7,87  | 20  | 26,67  |
| (A)0hr | SEEL    | Q14126 | Desmoglein-2                                                                                                     | DSG2    | 39 | 53,49 | 424 | 565,33 |

|        |         |        |                                                                  |         |    |       |      |         |
|--------|---------|--------|------------------------------------------------------------------|---------|----|-------|------|---------|
| (A)0hr | SEEL    | Q14126 | Desmoglein-2                                                     | DSG2    | 31 | 33,90 | 238  | 317,33  |
| (A)0hr | SEEL    | Q14126 | Desmoglein-2                                                     | DSG2    | 10 | 13,15 | 23   | 30,67   |
| (A)0hr | Control | P15924 | Desmoplakin                                                      | DSP     | 17 | 5,68  | 32   | 42,67   |
| (A)0hr | Control | P15924 | Desmoplakin                                                      | DSP     | 37 | 12,19 | 81   | 108,00  |
| (A)0hr | SEEL    | P15924 | Desmoplakin                                                      | DSP     | 28 | 9,09  | 67   | 89,33   |
| (A)0hr | SEEL    | P15924 | Desmoplakin                                                      | DSP     | 20 | 6,69  | 51   | 68,00   |
| (A)0hr | Control | Q14204 | Cytoplasmic dynein 1 heavy chain 1                               | DYNC1H1 | 5  | 1,18  | 12   | 16,00   |
| (A)0hr | SEEL    | Q14204 | Cytoplasmic dynein 1 heavy chain 1                               | DYNC1H1 | 20 | 4,41  | 47   | 62,67   |
| (A)0hr | SEEL    | P42892 | Endothelin-converting enzyme 1                                   | ECE1    | 9  | 12,73 | 24   | 32,00   |
| (A)0hr | SEEL    | P42892 | Endothelin-converting enzyme 1                                   | ECE1    | 32 | 43,25 | 348  | 464,00  |
| (A)0hr | SEEL    | O95672 | Endothelin-converting enzyme-like 1                              | ECEL1   | 14 | 23,23 | 41   | 54,67   |
| (A)0hr | SEEL    | O43854 | EGF-like repeat and discoidin I-like domain-containing protein 3 | EDIL3   | 17 | 33,54 | 80   | 106,67  |
| (A)0hr | Control | P68104 | Elongation factor 1-alpha 1                                      | EEF1A1  | 2  | 4,55  | 6    | 8,00    |
| (A)0hr | SEEL    | P68104 | Elongation factor 1-alpha 1                                      | EEF1A1  | 8  | 19,05 | 31   | 41,33   |
| (A)0hr | SEEL    | P68104 | Elongation factor 1-alpha 1                                      | EEF1A1  | 7  | 13,85 | 21   | 28,00   |
| (A)0hr | SEEL    | P68104 | Elongation factor 1-alpha 1                                      | EEF1A1  | 2  | 4,55  | 8    | 10,67   |
| (A)0hr | SEEL    | P68104 | Elongation factor 1-alpha 1                                      | EEF1A1  | 7  | 13,85 | 24   | 32,00   |
| (A)0hr | Control | P13639 | Elongation factor 2                                              | EEF2    | 18 | 21,56 | 77   | 102,67  |
| (A)0hr | SEEL    | P13639 | Elongation factor 2                                              | EEF2    | 16 | 21,79 | 45   | 60,00   |
| (A)0hr | Control | Q15029 | 116 kDa U5 small nuclear ribonucleoprotein component             | EFTUD2  | 7  | 8,23  | 14   | 18,67   |
| (A)0hr | SEEL    | P00533 | Epidermal growth factor receptor                                 | EGFR    | 24 | 23,14 | 132  | 176,00  |
| (A)0hr | SEEL    | P00533 | Epidermal growth factor receptor                                 | EGFR    | 65 | 58,51 | 1163 | 1550,67 |
| (A)0hr | SEEL    | P00533 | Epidermal growth factor receptor                                 | EGFR    | 29 | 29,26 | 164  | 218,67  |
| (A)0hr | SEEL    | P00533 | Epidermal growth factor receptor                                 | EGFR    | 17 | 16,20 | 63   | 84,00   |
| (A)0hr | Control | O60841 | Eukaryotic translation initiation factor 5B                      | EIF5B   | 19 | 17,13 | 56   | 74,67   |
| (A)0hr | SEEL    | Q9UHX3 | EGF-like module-containing mucin-like hormone receptor-like 2    | EMR2    | 2  | 5,22  | 6    | 8,00    |
| (A)0hr | SEEL    | P17813 | Endoglin                                                         | ENG     | 6  | 12,31 | 20   | 26,67   |
| (A)0hr | SEEL    | P17813 | Endoglin                                                         | ENG     | 10 | 18,84 | 41   | 54,67   |
| (A)0hr | SEEL    | P17813 | Endoglin                                                         | ENG     | 20 | 32,22 | 221  | 294,67  |
| (A)0hr | SEEL    | P17813 | Endoglin                                                         | ENG     | 7  | 13,68 | 27   | 36,00   |
| (A)0hr | SEEL    | P22413 | Ectonucleotide pyrophosphatase/phosphodiesterase family member 1 | ENPP1   | 7  | 6,59  | 15   | 20,00   |
| (A)0hr | SEEL    | P22413 | Ectonucleotide pyrophosphatase/phosphodiesterase family member 1 | ENPP1   | 3  | 3,57  | 6    | 8,00    |
| (A)0hr | SEEL    | Q9Y5L3 | Ectonucleoside triphosphate diphosphohydrolase 2                 | ENTPD2  | 3  | 5,86  | 5    | 6,67    |
| (A)0hr | SEEL    | P29317 | Ephrin type-A receptor 2                                         | EPHA2   | 3  | 3,59  | 7    | 9,33    |
| (A)0hr | SEEL    | P29317 | Ephrin type-A receptor 2                                         | EPHA2   | 9  | 9,43  | 21   | 28,00   |
| (A)0hr | SEEL    | P29317 | Ephrin type-A receptor 2                                         | EPHA2   | 23 | 27,05 | 118  | 157,33  |
| (A)0hr | SEEL    | P29323 | Ephrin type-B receptor 2                                         | EPHB2   | 9  | 11,09 | 22   | 29,33   |
| (A)0hr | SEEL    | P54753 | Ephrin type-B receptor 3                                         | EPHB3   | 2  | 3,21  | 5    | 6,67    |
| (A)0hr | SEEL    | P54760 | Ephrin type-B receptor 4                                         | EPHB4   | 13 | 14,99 | 33   | 44,00   |
| (A)0hr | SEEL    | P54760 | Ephrin type-B receptor 4                                         | EPHB4   | 36 | 41,84 | 247  | 329,33  |
| (A)0hr | SEEL    | P54760 | Ephrin type-B receptor 4                                         | EPHB4   | 3  | 3,95  | 4    | 5,33    |
| (A)0hr | Control | P58107 | Epiplakin                                                        | EPPK1   | 4  | 1,02  | 10   | 13,33   |
| (A)0hr | Control | P58107 | Epiplakin                                                        | EPPK1   | 5  | 1,14  | 11   | 14,67   |
| (A)0hr | SEEL    | P58107 | Epiplakin                                                        | EPPK1   | 3  | 0,57  | 10   | 13,33   |
| (A)0hr | SEEL    | P58107 | Epiplakin                                                        | EPPK1   | 2  | 0,41  | 4    | 5,33    |
| (A)0hr | Control | P07814 | Bifunctional glutamate/proline--tRNA ligase                      | EPRS    | 11 | 8,07  | 31   | 41,33   |
| (A)0hr | SEEL    | P07814 | Bifunctional glutamate/proline--tRNA ligase                      | EPRS    | 12 | 7,94  | 32   | 42,67   |
| (A)0hr | SEEL    | P04626 | Receptor tyrosine-protein kinase erbB-2                          | ERBB2   | 19 | 15,46 | 103  | 137,33  |
| (A)0hr | SEEL    | P04626 | Receptor tyrosine-protein kinase erbB-2                          | ERBB2   | 5  | 3,51  | 8    | 10,67   |
| (A)0hr | SEEL    | Q9BSJ8 | Extended synaptotagmin-1                                         | ESYT1   | 2  | 2,63  | 3    | 4,00    |
| (A)0hr | Control | H7BXI1 | Extended synaptotagmin-2 (Fragment)                              | ESYT2   | 11 | 13,12 | 30   | 40,00   |
| (A)0hr | SEEL    | H7BXI1 | Extended synaptotagmin-2 (Fragment)                              | ESYT2   | 7  | 10,29 | 13   | 17,33   |
| (A)0hr | Control | P49327 | Fatty acid synthase                                              | FASN    | 26 | 10,99 | 58   | 77,33   |
| (A)0hr | SEEL    | P49327 | Fatty acid synthase                                              | FASN    | 14 | 6,01  | 24   | 32,00   |
| (A)0hr | SEEL    | Q7L8L6 | FAST kinase domain-containing protein 5                          | FASTKD5 | 3  | 3,80  | 6    | 8,00    |
| (A)0hr | SEEL    | Q14517 | Protocadherin Fat 1                                              | FAT1    | 47 | 11,79 | 149  | 198,67  |
| (A)0hr | SEEL    | Q14517 | Protocadherin Fat 1                                              | FAT1    | 20 | 4,75  | 45   | 60,00   |
| (A)0hr | SEEL    | Q6V0I7 | Protocadherin Fat 4                                              | FAT4    | 15 | 3,23  | 32   | 42,67   |
| (A)0hr | SEEL    | P35555 | Fibrillin-1                                                      | FBN1    | 6  | 5,26  | 17   | 22,67   |
| (A)0hr | SEEL    | P21802 | Fibroblast growth factor receptor 2                              | FGFR2   | 10 | 11,21 | 24   | 32,00   |
| (A)0hr | SEEL    | P20930 | Filaggrin                                                        | FLG     | 3  | 0,49  | 8    | 10,67   |
| (A)0hr | Control | Q5D862 | Filaggrin-2                                                      | FLG2    | 5  | 3,26  | 15   | 20,00   |
| (A)0hr | SEEL    | Q5D862 | Filaggrin-2                                                      | FLG2    | 3  | 2,34  | 12   | 16,00   |
| (A)0hr | Control | P21333 | Filamin-A                                                        | FLNA    | 58 | 28,15 | 217  | 289,33  |
| (A)0hr | SEEL    | P21333 | Filamin-A                                                        | FLNA    | 19 | 9,10  | 40   | 53,33   |
| (A)0hr | Control | O75369 | Filamin-B                                                        | FLNB    | 7  | 2,92  | 13   | 17,33   |



|        |         |        |                                                          |          |    |       |     |        |
|--------|---------|--------|----------------------------------------------------------|----------|----|-------|-----|--------|
| (A)0hr | Control | P35637 | RNA-binding protein FUS                                  | FUS      | 5  | 10,46 | 20  | 26,67  |
| (A)0hr | SEEL    | P35637 | RNA-binding protein FUS                                  | FUS      | 2  | 3,04  | 5   | 6,67   |
| (A)0hr | SEEL    | P06241 | Tyrosine-protein kinase Fyn                              | FYN      | 3  | 4,66  | 6   | 8,00   |
| (A)0hr | SEEL    | Q14332 | Frizzled-2                                               | FZD2     | 5  | 7,61  | 14  | 18,67  |
| (A)0hr | SEEL    | Q10472 | Polypeptide N-acetylgalactosaminyltransferase 1          | GALNT1   | 4  | 8,77  | 10  | 13,33  |
| (A)0hr | Control | Q14697 | Neutral alpha-glucosidase AB                             | GANAB    | 11 | 12,08 | 29  | 38,67  |
| (A)0hr | SEEL    | Q14697 | Neutral alpha-glucosidase AB                             | GANAB    | 11 | 13,56 | 25  | 33,33  |
| (A)0hr | Control | P41250 | Glycine--tRNA ligase                                     | GARS     | 6  | 8,12  | 10  | 13,33  |
| (A)0hr | SEEL    | P41250 | Glycine--tRNA ligase                                     | GARS     | 5  | 7,44  | 6   | 8,00   |
| (A)0hr | Control | P57678 | Gem-associated protein 4                                 | GEMIN4   | 5  | 5,29  | 11  | 14,67  |
| (A)0hr | Control | Q96RP9 | Elongation factor G, mitochondrial                       | GFM1     | 3  | 3,46  | 5   | 6,67   |
| (A)0hr | SEEL    | P19440 | Gamma-glutamyltranspeptidase 1                           | GGT1     | 9  | 15,64 | 29  | 38,67  |
| (A)0hr | Control | Q9Y2X7 | ARF GTPase-activating protein GIT1                       | GIT1     | 7  | 10,12 | 21  | 28,00  |
| (A)0hr | Control | Q9Y2X7 | ARF GTPase-activating protein GIT1                       | GIT1     | 18 | 25,76 | 90  | 120,00 |
| (A)0hr | Control | Q9Y2X7 | ARF GTPase-activating protein GIT1                       | GIT1     | 9  | 13,27 | 51  | 68,00  |
| (A)0hr | Control | Q14161 | ARF GTPase-activating protein GIT2                       | GIT2     | 19 | 23,98 | 96  | 128,00 |
| (A)0hr | SEEL    | P16278 | Beta-galactosidase                                       | GLB1     | 3  | 6,20  | 6   | 8,00   |
| (A)0hr | SEEL    | Q92896 | Golgi apparatus protein 1                                | GLG1     | 8  | 6,70  | 18  | 24,00  |
| (A)0hr | SEEL    | Q92896 | Golgi apparatus protein 1                                | GLG1     | 28 | 22,99 | 154 | 205,33 |
| (A)0hr | SEEL    | Q92896 | Golgi apparatus protein 1                                | GLG1     | 2  | 1,87  | 6   | 8,00   |
| (A)0hr | Control | Q9BVP2 | Guanine nucleotide-binding protein-like 3                | GNL3     | 5  | 9,47  | 13  | 17,33  |
| (A)0hr | SEEL    | Q9BVP2 | Guanine nucleotide-binding protein-like 3                | GNL3     | 11 | 22,77 | 38  | 50,67  |
| (A)0hr | SEEL    | P15586 | N-acetylglucosamine-6-sulfatase                          | GNS      | 7  | 12,14 | 21  | 28,00  |
| (A)0hr | SEEL    | O00461 | Golgi integral membrane protein 4                        | GOLIM4   | 5  | 9,63  | 14  | 18,67  |
| (A)0hr | SEEL    | P35052 | Glypican-1                                               | GPC1     | 17 | 37,81 | 95  | 126,67 |
| (A)0hr | SEEL    | P43304 | Glycerol-3-phosphate dehydrogenase, mitochondrial        | GPD2     | 16 | 23,93 | 37  | 49,33  |
| (A)0hr | SEEL    | Q81WK6 | Probable G-protein coupled receptor 125                  | GPR125   | 8  | 7,04  | 17  | 22,67  |
| (A)0hr | SEEL    | Q9Y653 | G-protein coupled receptor 56                            | GPR56    | 8  | 15,44 | 21  | 28,00  |
| (A)0hr | SEEL    | Q8NFJ5 | Retinoic acid-induced protein 3                          | GPRC5A   | 4  | 17,37 | 25  | 33,33  |
| (A)0hr | SEEL    | Q8NFJ5 | Retinoic acid-induced protein 3                          | GPRC5A   | 3  | 17,37 | 7   | 9,33   |
| (A)0hr | Control | P28799 | Granulins                                                | GRN      | 11 | 20,74 | 59  | 78,67  |
| (A)0hr | Control | P28799 | Granulins                                                | GRN      | 14 | 22,77 | 84  | 112,00 |
| (A)0hr | SEEL    | P28799 | Granulins                                                | GRN      | 9  | 17,20 | 29  | 38,67  |
| (A)0hr | SEEL    | P28799 | Granulins                                                | GRN      | 6  | 11,13 | 23  | 30,67  |
| (A)0hr | SEEL    | P78347 | General transcription factor II-I                        | GTF2I    | 3  | 3,61  | 7   | 9,33   |
| (A)0hr | SEEL    | Q9BZE4 | Nucleolar GTP-binding protein 1                          | GTPBP4   | 8  | 13,09 | 31  | 41,33  |
| (A)0hr | Control | P40939 | Trifunctional enzyme subunit alpha, mitochondrial        | HADHA    | 5  | 6,82  | 11  | 14,67  |
| (A)0hr | SEEL    | P40939 | Trifunctional enzyme subunit alpha, mitochondrial        | HADHA    | 6  | 9,96  | 12  | 16,00  |
| (A)0hr | SEEL    | Q9ULI3 | Protein HEG homolog 1                                    | HEG1     | 10 | 8,33  | 53  | 70,67  |
| (A)0hr | SEEL    | Q9ULI3 | Protein HEG homolog 1                                    | HEG1     | 5  | 3,62  | 19  | 25,33  |
| (A)0hr | Control | P10412 | Histone H1.4                                             | HIST1H1E | 5  | 15,53 | 40  | 53,33  |
| (A)0hr | SEEL    | P10412 | Histone H1.4                                             | HIST1H1E | 4  | 15,07 | 11  | 14,67  |
| (A)0hr | SEEL    | I6R1A7 | MHC class I antigen (Fragment)                           | HLA-A    | 4  | 16,85 | 13  | 17,33  |
| (A)0hr | SEEL    | P01891 | HLA class I histocompatibility antigen, A-68 alpha chain | HLA-A    | 2  | 7,12  | 6   | 8,00   |
| (A)0hr | SEEL    | P01891 | HLA class I histocompatibility antigen, A-68 alpha chain | HLA-A    | 4  | 14,25 | 10  | 13,33  |
| (A)0hr | Control | P61978 | Heterogeneous nuclear ribonucleoprotein K                | HNRNPK   | 11 | 27,65 | 57  | 76,00  |
| (A)0hr | SEEL    | P61978 | Heterogeneous nuclear ribonucleoprotein K                | HNRNPK   | 11 | 31,97 | 61  | 81,33  |
| (A)0hr | Control | P14866 | Heterogeneous nuclear ribonucleoprotein L                | HNRNPL   | 6  | 12,90 | 18  | 24,00  |
| (A)0hr | SEEL    | P14866 | Heterogeneous nuclear ribonucleoprotein L                | HNRNPL   | 8  | 20,54 | 24  | 32,00  |
| (A)0hr | Control | P52272 | Heterogeneous nuclear ribonucleoprotein M                | HNRNPM   | 8  | 13,42 | 20  | 26,67  |
| (A)0hr | SEEL    | P52272 | Heterogeneous nuclear ribonucleoprotein M                | HNRNPM   | 14 | 19,45 | 47  | 62,67  |
| (A)0hr | Control | Q00839 | Heterogeneous nuclear ribonucleoprotein U                | HNRNPU   | 12 | 12,36 | 56  | 74,67  |
| (A)0hr | SEEL    | Q00839 | Heterogeneous nuclear ribonucleoprotein U                | HNRNPU   | 5  | 6,91  | 14  | 18,67  |
| (A)0hr | SEEL    | Q00839 | Heterogeneous nuclear ribonucleoprotein U                | HNRNPU   | 20 | 25,58 | 73  | 97,33  |
| (A)0hr | SEEL    | Q00839 | Heterogeneous nuclear ribonucleoprotein U                | HNRNPU   | 3  | 3,64  | 7   | 9,33   |
| (A)0hr | Control | Q9BUJ2 | Heterogeneous nuclear ribonucleoprotein U-like protein 1 | HNRNPUL1 | 3  | 4,44  | 7   | 9,33   |
| (A)0hr | Control | Q86Y23 | Hornerin                                                 | HRNR     | 14 | 8,46  | 93  | 124,00 |
| (A)0hr | Control | Q86Y23 | Hornerin                                                 | HRNR     | 13 | 8,28  | 74  | 98,67  |
| (A)0hr | SEEL    | Q86Y23 | Hornerin                                                 | HRNR     | 15 | 9,40  | 73  | 97,33  |
| (A)0hr | SEEL    | Q86Y23 | Hornerin                                                 | HRNR     | 4  | 2,42  | 20  | 26,67  |
| (A)0hr | SEEL    | Q86Y23 | Hornerin                                                 | HRNR     | 2  | 1,26  | 6   | 8,00   |
| (A)0hr | SEEL    | Q86Y23 | Hornerin                                                 | HRNR     | 2  | 1,26  | 3   | 4,00   |
| (A)0hr | SEEL    | P07900 | Heat shock protein HSP 90-alpha                          | HSP90AA1 | 7  | 10,25 | 18  | 24,00  |
| (A)0hr | Control | P08238 | Heat shock protein HSP 90-beta                           | HSP90AB1 | 10 | 12,98 | 43  | 57,33  |
| (A)0hr | SEEL    | P08238 | Heat shock protein HSP 90-beta                           | HSP90AB1 | 5  | 7,46  | 12  | 16,00  |
| (A)0hr | SEEL    | P08238 | Heat shock protein HSP 90-beta                           | HSP90AB1 | 14 | 22,10 | 61  | 81,33  |

|        |         |        |                                                                            |          |    |       |      |         |
|--------|---------|--------|----------------------------------------------------------------------------|----------|----|-------|------|---------|
| (A)0hr | SEEL    | P08238 | Heat shock protein HSP 90-beta                                             | HSP90AB1 | 3  | 4,28  | 5    | 6,67    |
| (A)0hr | Control | P14625 | Endoplasmic                                                                | HSP90B1  | 10 | 11,96 | 30   | 40,00   |
| (A)0hr | SEEL    | P14625 | Endoplasmic                                                                | HSP90B1  | 10 | 13,57 | 30   | 40,00   |
| (A)0hr | SEEL    | P08107 | Heat shock 70 kDa protein 1A/1B                                            | HSPA1A   | 6  | 11,70 | 13   | 17,33   |
| (A)0hr | SEEL    | P08107 | Heat shock 70 kDa protein 1A/1B                                            | HSPA1A   | 8  | 16,22 | 23   | 30,67   |
| (A)0hr | SEEL    | P08107 | Heat shock 70 kDa protein 1A/1B                                            | HSPA1A   | 2  | 4,06  | 6    | 8,00    |
| (A)0hr | Control | P34931 | Heat shock 70 kDa protein 1-like                                           | HSPA1L   | 2  | 4,37  | 3    | 4,00    |
| (A)0hr | Control | P11021 | 78 kDa glucose-regulated protein                                           | HSPA5    | 43 | 59,17 | 395  | 526,67  |
| (A)0hr | Control | P11021 | 78 kDa glucose-regulated protein                                           | HSPA5    | 44 | 59,17 | 604  | 805,33  |
| (A)0hr | SEEL    | P11021 | 78 kDa glucose-regulated protein                                           | HSPA5    | 22 | 40,06 | 93   | 124,00  |
| (A)0hr | SEEL    | P11021 | 78 kDa glucose-regulated protein                                           | HSPA5    | 40 | 55,20 | 493  | 657,33  |
| (A)0hr | Control | P11142 | Heat shock cognate 71 kDa protein                                          | HSPA8    | 31 | 49,69 | 272  | 362,67  |
| (A)0hr | SEEL    | P11142 | Heat shock cognate 71 kDa protein                                          | HSPA8    | 28 | 43,34 | 380  | 506,67  |
| (A)0hr | SEEL    | B724T3 | cDNA FLJ51903, highly similar to Stress-70 protein, mitochondrial          | HSPA9    | 2  | 8,54  | 2    | 2,67    |
| (A)0hr | Control | P38646 | Stress-70 protein, mitochondrial                                           | HSPA9    | 8  | 13,55 | 31   | 41,33   |
| (A)0hr | Control | P38646 | Stress-70 protein, mitochondrial                                           | HSPA9    | 21 | 34,02 | 104  | 138,67  |
| (A)0hr | Control | P38646 | Stress-70 protein, mitochondrial                                           | HSPA9    | 60 | 61,56 | 1449 | 1932,00 |
| (A)0hr | SEEL    | P38646 | Stress-70 protein, mitochondrial                                           | HSPA9    | 6  | 11,05 | 18   | 24,00   |
| (A)0hr | SEEL    | P38646 | Stress-70 protein, mitochondrial                                           | HSPA9    | 27 | 33,58 | 584  | 778,67  |
| (A)0hr | Control | P10809 | 60 kDa heat shock protein, mitochondrial                                   | HSPD1    | 21 | 37,17 | 113  | 150,67  |
| (A)0hr | SEEL    | P10809 | 60 kDa heat shock protein, mitochondrial                                   | HSPD1    | 5  | 11,69 | 12   | 16,00   |
| (A)0hr | SEEL    | P10809 | 60 kDa heat shock protein, mitochondrial                                   | HSPD1    | 5  | 11,34 | 10   | 13,33   |
| (A)0hr | SEEL    | P10809 | 60 kDa heat shock protein, mitochondrial                                   | HSPD1    | 28 | 42,93 | 237  | 316,00  |
| (A)0hr | SEEL    | B722N4 | cDNA FLJ56074, highly similar to 150 kDa oxygen-regulated protein (Orp150) | HYOU1    | 8  | 10,30 | 18   | 24,00   |
| (A)0hr | Control | Q9Y4L1 | Hypoxia up-regulated protein 1                                             | HYOU1    | 16 | 16,72 | 39   | 52,00   |
| (A)0hr | Control | P41252 | Isoleucine--tRNA ligase, cytoplasmic                                       | IARS     | 8  | 7,21  | 19   | 25,33   |
| (A)0hr | SEEL    | P41252 | Isoleucine--tRNA ligase, cytoplasmic                                       | IARS     | 7  | 5,94  | 13   | 17,33   |
| (A)0hr | Control | Q9NSE4 | Isoleucine--tRNA ligase, mitochondrial                                     | IARS2    | 6  | 7,71  | 12   | 16,00   |
| (A)0hr | SEEL    | Q9NSE4 | Isoleucine--tRNA ligase, mitochondrial                                     | IARS2    | 4  | 4,94  | 6    | 8,00    |
| (A)0hr | SEEL    | P05362 | Intercellular adhesion molecule 1                                          | ICAM1    | 4  | 9,02  | 9    | 12,00   |
| (A)0hr | SEEL    | P05362 | Intercellular adhesion molecule 1                                          | ICAM1    | 12 | 25,94 | 46   | 61,33   |
| (A)0hr | SEEL    | P05362 | Intercellular adhesion molecule 1                                          | ICAM1    | 29 | 45,68 | 614  | 818,67  |
| (A)0hr | SEEL    | P05362 | Intercellular adhesion molecule 1                                          | ICAM1    | 18 | 34,21 | 109  | 145,33  |
| (A)0hr | SEEL    | Q9UMF0 | Intercellular adhesion molecule 5                                          | ICAM5    | 8  | 11,80 | 12   | 16,00   |
| (A)0hr | SEEL    | O75144 | ICOS ligand                                                                | ICOSLG   | 3  | 7,62  | 9    | 12,00   |
| (A)0hr | SEEL    | P17181 | Interferon alpha/beta receptor 1                                           | IFNAR1   | 6  | 10,59 | 19   | 25,33   |
| (A)0hr | SEEL    | P08069 | Insulin-like growth factor 1 receptor                                      | IGF1R    | 5  | 3,51  | 10   | 13,33   |
| (A)0hr | SEEL    | P08069 | Insulin-like growth factor 1 receptor                                      | IGF1R    | 25 | 18,80 | 94   | 125,33  |
| (A)0hr | SEEL    | P08069 | Insulin-like growth factor 1 receptor                                      | IGF1R    | 46 | 37,31 | 460  | 613,33  |
| (A)0hr | SEEL    | P08069 | Insulin-like growth factor 1 receptor                                      | IGF1R    | 10 | 6,80  | 33   | 44,00   |
| (A)0hr | SEEL    | P11717 | Cation-independent mannose-6-phosphate receptor                            | IGF2R    | 86 | 38,10 | 608  | 810,67  |
| (A)0hr | SEEL    | P11717 | Cation-independent mannose-6-phosphate receptor                            | IGF2R    | 91 | 42,03 | 960  | 1280,00 |
| (A)0hr | SEEL    | P11717 | Cation-independent mannose-6-phosphate receptor                            | IGF2R    | 20 | 8,23  | 46   | 61,33   |
| (A)0hr | SEEL    | P11717 | Cation-independent mannose-6-phosphate receptor                            | IGF2R    | 4  | 1,77  | 9    | 12,00   |
| (A)0hr | SEEL    | O75054 | Immunoglobulin superfamily member 3                                        | IGSF3    | 16 | 17,00 | 39   | 52,00   |
| (A)0hr | SEEL    | Q969P0 | Immunoglobulin superfamily member 8                                        | IGSF8    | 16 | 37,03 | 119  | 158,67  |
| (A)0hr | SEEL    | Q9NPH3 | Interleukin-1 receptor accessory protein                                   | IL1RAP   | 5  | 8,95  | 13   | 17,33   |
| (A)0hr | SEEL    | Q9NPH3 | Interleukin-1 receptor accessory protein                                   | IL1RAP   | 10 | 16,32 | 28   | 37,33   |
| (A)0hr | SEEL    | P40189 | Interleukin-6 receptor subunit beta                                        | IL6ST    | 5  | 5,23  | 8    | 10,67   |
| (A)0hr | Control | A1L0T0 | Acetolactate synthase-like protein                                         | ILVBL    | 2  | 3,32  | 4    | 5,33    |
| (A)0hr | SEEL    | Q16891 | MICOS complex subunit MIC60                                                | IMMT     | 8  | 12,80 | 16   | 21,33   |
| (A)0hr | SEEL    | P06213 | Insulin receptor                                                           | INSR     | 22 | 13,46 | 83   | 110,67  |
| (A)0hr | SEEL    | P06213 | Insulin receptor                                                           | INSR     | 54 | 34,88 | 457  | 609,33  |
| (A)0hr | SEEL    | P06213 | Insulin receptor                                                           | INSR     | 6  | 4,20  | 14   | 18,67   |
| (A)0hr | Control | P46940 | Ras GTPase-activating-like protein IQGAP1                                  | IQGAP1   | 5  | 3,86  | 11   | 14,67   |
| (A)0hr | SEEL    | P46940 | Ras GTPase-activating-like protein IQGAP1                                  | IQGAP1   | 8  | 6,88  | 16   | 21,33   |
| (A)0hr | SEEL    | Q96J02 | E3 ubiquitin-protein ligase Itchy homolog                                  | ITCH     | 3  | 2,77  | 5    | 6,67    |
| (A)0hr | SEEL    | Q8TB96 | T-cell immunomodulatory protein                                            | ITFG1    | 10 | 21,08 | 40   | 53,33   |
| (A)0hr | SEEL    | Q9H0X4 | Protein ITFG3                                                              | ITFG3    | 5  | 9,60  | 13   | 17,33   |
| (A)0hr | SEEL    | Q9H0X4 | Protein ITFG3                                                              | ITFG3    | 15 | 34,24 | 92   | 122,67  |
| (A)0hr | SEEL    | P56199 | Integrin alpha-1                                                           | ITGA1    | 14 | 11,20 | 42   | 56,00   |
| (A)0hr | SEEL    | P56199 | Integrin alpha-1                                                           | ITGA1    | 34 | 25,53 | 271  | 361,33  |
| (A)0hr | SEEL    | P17301 | Integrin alpha-2                                                           | ITGA2    | 3  | 4,49  | 8    | 10,67   |
| (A)0hr | SEEL    | P17301 | Integrin alpha-2                                                           | ITGA2    | 8  | 8,98  | 77   | 102,67  |
| (A)0hr | SEEL    | P17301 | Integrin alpha-2                                                           | ITGA2    | 2  | 2,12  | 7    | 9,33    |
| (A)0hr | SEEL    | P26006 | Integrin alpha-3                                                           | ITGA3    | 10 | 9,51  | 44   | 58,67   |

|        |         |        |                                                                          |           |    |       |     |         |
|--------|---------|--------|--------------------------------------------------------------------------|-----------|----|-------|-----|---------|
| (A)0hr | SEEL    | P26006 | Integrin alpha-3                                                         | ITGA3     | 17 | 15,03 | 165 | 220,00  |
| (A)0hr | SEEL    | P26006 | Integrin alpha-3                                                         | ITGA3     | 3  | 2,76  | 5   | 6,67    |
| (A)0hr | SEEL    | P08648 | Integrin alpha-5                                                         | ITGA5     | 16 | 19,73 | 148 | 197,33  |
| (A)0hr | SEEL    | P08648 | Integrin alpha-5                                                         | ITGA5     | 14 | 16,59 | 73  | 97,33   |
| (A)0hr | SEEL    | P08648 | Integrin alpha-5                                                         | ITGA5     | 3  | 3,53  | 5   | 6,67    |
| (A)0hr | SEEL    | P23229 | Integrin alpha-6                                                         | ITGA6     | 37 | 41,15 | 241 | 321,33  |
| (A)0hr | SEEL    | P23229 | Integrin alpha-6                                                         | ITGA6     | 6  | 5,93  | 21  | 28,00   |
| (A)0hr | SEEL    | A5YM53 | ITGAV protein                                                            | ITGAV     | 32 | 36,55 | 160 | 213,33  |
| (A)0hr | SEEL    | A5YM53 | ITGAV protein                                                            | ITGAV     | 52 | 47,52 | 555 | 740,00  |
| (A)0hr | SEEL    | P06756 | Integrin alpha-V                                                         | ITGAV     | 7  | 8,02  | 18  | 24,00   |
| (A)0hr | SEEL    | P05556 | Integrin beta-1                                                          | ITGB1     | 12 | 16,29 | 39  | 52,00   |
| (A)0hr | SEEL    | P05556 | Integrin beta-1                                                          | ITGB1     | 29 | 32,46 | 395 | 526,67  |
| (A)0hr | SEEL    | P05556 | Integrin beta-1                                                          | ITGB1     | 28 | 34,96 | 505 | 673,33  |
| (A)0hr | SEEL    | P05556 | Integrin beta-1                                                          | ITGB1     | 12 | 16,54 | 48  | 64,00   |
| (A)0hr | SEEL    | P16144 | Integrin beta-4                                                          | ITGB4     | 50 | 30,90 | 265 | 353,33  |
| (A)0hr | SEEL    | P18084 | Integrin beta-5                                                          | ITGB5     | 9  | 13,52 | 15  | 20,00   |
| (A)0hr | SEEL    | P18084 | Integrin beta-5                                                          | ITGB5     | 32 | 46,18 | 230 | 306,67  |
| (A)0hr | SEEL    | P18084 | Integrin beta-5                                                          | ITGB5     | 5  | 6,51  | 11  | 14,67   |
| (A)0hr | SEEL    | P26012 | Integrin beta-8                                                          | ITGB8     | 13 | 18,47 | 50  | 66,67   |
| (A)0hr | SEEL    | Q9Y219 | Protein jagged-2                                                         | JAG2      | 6  | 5,01  | 15  | 20,00   |
| (A)0hr | SEEL    | P14923 | Junction plakoglobin                                                     | JUP       | 5  | 7,92  | 15  | 20,00   |
| (A)0hr | SEEL    | P14923 | Junction plakoglobin                                                     | JUP       | 12 | 18,66 | 32  | 42,67   |
| (A)0hr | SEEL    | P14923 | Junction plakoglobin                                                     | JUP       | 23 | 38,93 | 223 | 297,33  |
| (A)0hr | SEEL    | P14923 | Junction plakoglobin                                                     | JUP       | 19 | 31,01 | 135 | 180,00  |
| (A)0hr | Control | Q92945 | Far upstream element-binding protein 2                                   | KHSRP     | 4  | 6,19  | 6   | 8,00    |
| (A)0hr | SEEL    | Q92945 | Far upstream element-binding protein 2                                   | KHSRP     | 3  | 4,92  | 6   | 8,00    |
| (A)0hr | SEEL    | Q6NSJ0 | Uncharacterized family 31 glucosidase KIAA1161                           | KIAA1161  | 16 | 21,85 | 54  | 72,00   |
| (A)0hr | SEEL    | Q9HCM3 | UPF0606 protein KIAA1549                                                 | KIAA1549  | 10 | 4,67  | 62  | 82,67   |
| (A)0hr | SEEL    | Q9HCM3 | UPF0606 protein KIAA1549                                                 | KIAA1549  | 7  | 3,23  | 25  | 33,33   |
| (A)0hr | SEEL    | Q9HCM3 | UPF0606 protein KIAA1549                                                 | KIAA1549  | 12 | 8,51  | 31  | 41,33   |
| (A)0hr | SEEL    | Q9ULH0 | Kinase D-interacting substrate of 220 kDa                                | KIDINS220 | 25 | 15,08 | 60  | 80,00   |
| (A)0hr | SEEL    | Q96J84 | Kin of IRRE-like protein 1                                               | KIRREL    | 22 | 36,46 | 127 | 169,33  |
| (A)0hr | SEEL    | Q96J84 | Kin of IRRE-like protein 1                                               | KIRREL    | 4  | 8,19  | 10  | 13,33   |
| (A)0hr | Control | Q53GT1 | Kelch-like protein 22                                                    | KLHL22    | 16 | 30,76 | 49  | 65,33   |
| (A)0hr | SEEL    | Q53GT1 | Kelch-like protein 22                                                    | KLHL22    | 5  | 8,36  | 8   | 10,67   |
| (A)0hr | SEEL    | Q9UMN6 | Histone-lysine N-methyltransferase 2B                                    | KMT2B     | 5  | 3,13  | 8   | 10,67   |
| (A)0hr | SEEL    | Q14974 | Importin subunit beta-1                                                  | KPNB1     | 4  | 6,74  | 6   | 8,00    |
| (A)0hr | Control | Q5T749 | Keratinocyte proline-rich protein                                        | KPRP      | 3  | 7,77  | 15  | 20,00   |
| (A)0hr | SEEL    | H3BLW5 | Neural cell adhesion molecule L1 (Fragment)                              | L1CAM     | 2  | 18,30 | 21  | 28,00   |
| (A)0hr | SEEL    | P32004 | Neural cell adhesion molecule L1                                         | L1CAM     | 21 | 19,73 | 74  | 98,67   |
| (A)0hr | SEEL    | P32004 | Neural cell adhesion molecule L1                                         | L1CAM     | 40 | 35,08 | 785 | 1046,67 |
| (A)0hr | SEEL    | P32004 | Neural cell adhesion molecule L1                                         | L1CAM     | 20 | 18,93 | 86  | 114,67  |
| (A)0hr | SEEL    | P32004 | Neural cell adhesion molecule L1                                         | L1CAM     | 9  | 6,44  | 31  | 41,33   |
| (A)0hr | SEEL    | P24043 | Laminin subunit alpha-2                                                  | LAMA2     | 4  | 2,24  | 9   | 12,00   |
| (A)0hr | SEEL    | O15230 | Laminin subunit alpha-5                                                  | LAMA5     | 80 | 25,79 | 446 | 594,67  |
| (A)0hr | SEEL    | O15230 | Laminin subunit alpha-5                                                  | LAMA5     | 41 | 13,48 | 135 | 180,00  |
| (A)0hr | SEEL    | P07942 | Laminin subunit beta-1                                                   | LAMB1     | 32 | 19,43 | 127 | 169,33  |
| (A)0hr | SEEL    | P11047 | Laminin subunit gamma-1                                                  | LAMC1     | 6  | 4,72  | 13  | 17,33   |
| (A)0hr | SEEL    | P11047 | Laminin subunit gamma-1                                                  | LAMC1     | 34 | 26,04 | 154 | 205,33  |
| (A)0hr | SEEL    | P11279 | Lysosome-associated membrane glycoprotein 1                              | LAMP1     | 7  | 15,35 | 30  | 40,00   |
| (A)0hr | SEEL    | P01130 | Low-density lipoprotein receptor                                         | LDLR      | 18 | 23,72 | 122 | 162,67  |
| (A)0hr | SEEL    | P01130 | Low-density lipoprotein receptor                                         | LDLR      | 7  | 11,28 | 17  | 22,67   |
| (A)0hr | Control | Q08380 | Galectin-3-binding protein                                               | LGALS3BP  | 2  | 3,93  | 4   | 5,33    |
| (A)0hr | Control | Q08380 | Galectin-3-binding protein                                               | LGALS3BP  | 11 | 16,75 | 60  | 80,00   |
| (A)0hr | SEEL    | Q08380 | Galectin-3-binding protein                                               | LGALS3BP  | 10 | 20,51 | 26  | 34,67   |
| (A)0hr | SEEL    | Q08380 | Galectin-3-binding protein                                               | LGALS3BP  | 11 | 20,17 | 47  | 62,67   |
| (A)0hr | SEEL    | Q9XB1  | Leucine-rich repeat-containing G-protein coupled receptor 4              | LGR4      | 6  | 7,36  | 14  | 18,67   |
| (A)0hr | SEEL    | P42702 | Leukemia inhibitory factor receptor                                      | LIFR      | 11 | 10,48 | 33  | 44,00   |
| (A)0hr | Control | P02545 | Prelamin-A/C                                                             | LMNA      | 23 | 36,75 | 125 | 166,67  |
| (A)0hr | SEEL    | P02545 | Prelamin-A/C                                                             | LMNA      | 29 | 44,28 | 177 | 236,00  |
| (A)0hr | Control | P20700 | Lamin-B1                                                                 | LMNB1     | 3  | 5,97  | 6   | 8,00    |
| (A)0hr | SEEL    | P20700 | Lamin-B1                                                                 | LMNB1     | 4  | 8,02  | 11  | 14,67   |
| (A)0hr | Control | Q9UIQ6 | Leucyl-cystinyl aminopeptidase                                           | LNPEP     | 8  | 8,29  | 17  | 22,67   |
| (A)0hr | SEEL    | Q9UIQ6 | Leucyl-cystinyl aminopeptidase                                           | LNPEP     | 33 | 31,90 | 304 | 405,33  |
| (A)0hr | Control | P36776 | Lon protease homolog, mitochondrial                                      | LONP1     | 6  | 6,67  | 10  | 13,33   |
| (A)0hr | SEEL    | Q9P244 | Leucine-rich repeat and fibronectin type III domain-containing protein 1 | LRFN1     | 11 | 20,10 | 35  | 46,67   |

|        |         |        |                                                                                              |         |    |       |     |         |
|--------|---------|--------|----------------------------------------------------------------------------------------------|---------|----|-------|-----|---------|
| (A)0hr | SEEL    | Q6PJG9 | Leucine-rich repeat and fibronectin type-III domain-containing protein 4                     | LRFN4   | 14 | 28,82 | 46  | 61,33   |
| (A)0hr | SEEL    | Q96JA1 | Leucine-rich repeats and immunoglobulin-like domains protein 1                               | LRIG1   | 6  | 7,23  | 12  | 16,00   |
| (A)0hr | SEEL    | Q07954 | Prolow-density lipoprotein receptor-related protein 1                                        | LRP1    | 74 | 18,60 | 349 | 465,33  |
| (A)0hr | SEEL    | Q07954 | Prolow-density lipoprotein receptor-related protein 1                                        | LRP1    | 12 | 3,50  | 20  | 26,67   |
| (A)0hr | SEEL    | Q07954 | Prolow-density lipoprotein receptor-related protein 1                                        | LRP1    | 5  | 1,61  | 8   | 10,67   |
| (A)0hr | SEEL    | O75197 | Low-density lipoprotein receptor-related protein 5                                           | LRP5    | 13 | 9,97  | 37  | 49,33   |
| (A)0hr | SEEL    | B7ZLD0 | LRP6 protein                                                                                 | LRP6    | 25 | 16,96 | 114 | 152,00  |
| (A)0hr | SEEL    | D3DQ39 | Low density lipoprotein receptor-related protein 8, apolipoprotein e receptor, isoform CRA_e | LRP8    | 5  | 6,43  | 10  | 13,33   |
| (A)0hr | SEEL    | Q14114 | Low-density lipoprotein receptor-related protein 8                                           | LRP8    | 2  | 2,08  | 5   | 6,67    |
| (A)0hr | Control | P42704 | Leucine-rich PPR motif-containing protein, mitochondrial                                     | LRPPRC  | 15 | 10,98 | 26  | 34,67   |
| (A)0hr | SEEL    | P42704 | Leucine-rich PPR motif-containing protein, mitochondrial                                     | LRPPRC  | 6  | 4,88  | 15  | 20,00   |
| (A)0hr | SEEL    | Q8IWT6 | Volume-regulated anion channel subunit LRRC8A                                                | LRRC8A  | 20 | 29,63 | 84  | 112,00  |
| (A)0hr | SEEL    | Q8IWT6 | Volume-regulated anion channel subunit LRRC8A                                                | LRRC8A  | 24 | 35,19 | 106 | 141,33  |
| (A)0hr | SEEL    | Q8IWT6 | Volume-regulated anion channel subunit LRRC8A                                                | LRRC8A  | 29 | 40,37 | 147 | 196,00  |
| (A)0hr | SEEL    | Q8IWT6 | Volume-regulated anion channel subunit LRRC8A                                                | LRRC8A  | 5  | 6,67  | 9   | 12,00   |
| (A)0hr | SEEL    | Q8TDW0 | Volume-regulated anion channel subunit LRRC8C                                                | LRRC8C  | 8  | 11,08 | 17  | 22,67   |
| (A)0hr | SEEL    | Q8TDW0 | Volume-regulated anion channel subunit LRRC8C                                                | LRRC8C  | 5  | 6,10  | 13  | 17,33   |
| (A)0hr | SEEL    | Q8TDW0 | Volume-regulated anion channel subunit LRRC8C                                                | LRRC8C  | 5  | 7,85  | 13  | 17,33   |
| (A)0hr | SEEL    | Q7L1W4 | Volume-regulated anion channel subunit LRRC8D                                                | LRRC8D  | 17 | 22,14 | 44  | 58,67   |
| (A)0hr | SEEL    | Q7L1W4 | Volume-regulated anion channel subunit LRRC8D                                                | LRRC8D  | 12 | 15,38 | 26  | 34,67   |
| (A)0hr | SEEL    | Q6NSJ5 | Volume-regulated anion channel subunit LRRC8E                                                | LRRC8E  | 16 | 23,62 | 57  | 76,00   |
| (A)0hr | SEEL    | Q6NSJ5 | Volume-regulated anion channel subunit LRRC8E                                                | LRRC8E  | 11 | 16,21 | 30  | 40,00   |
| (A)0hr | SEEL    | Q6NSJ5 | Volume-regulated anion channel subunit LRRC8E                                                | LRRC8E  | 7  | 11,06 | 16  | 21,33   |
| (A)0hr | SEEL    | O95274 | Ly6/PLAUR domain-containing protein 3                                                        | LYPD3   | 5  | 17,63 | 27  | 36,00   |
| (A)0hr | SEEL    | P43121 | Cell surface glycoprotein MUC18                                                              | MCAM    | 7  | 11,61 | 22  | 29,33   |
| (A)0hr | SEEL    | P43121 | Cell surface glycoprotein MUC18                                                              | MCAM    | 34 | 47,37 | 333 | 444,00  |
| (A)0hr | SEEL    | P43121 | Cell surface glycoprotein MUC18                                                              | MCAM    | 3  | 7,43  | 76  | 101,33  |
| (A)0hr | SEEL    | P43121 | Cell surface glycoprotein MUC18                                                              | MCAM    | 23 | 37,15 | 213 | 284,00  |
| (A)0hr | Control | Q96RQ3 | Methylcrotonoyl-CoA carboxylase subunit alpha, mitochondrial                                 | MCCC1   | 4  | 6,90  | 7   | 9,33    |
| (A)0hr | Control | Q96RQ3 | Methylcrotonoyl-CoA carboxylase subunit alpha, mitochondrial                                 | MCCC1   | 13 | 17,38 | 54  | 72,00   |
| (A)0hr | Control | Q96RQ3 | Methylcrotonoyl-CoA carboxylase subunit alpha, mitochondrial                                 | MCCC1   | 21 | 28,28 | 103 | 137,33  |
| (A)0hr | Control | Q96RQ3 | Methylcrotonoyl-CoA carboxylase subunit alpha, mitochondrial                                 | MCCC1   | 37 | 58,07 | 658 | 877,33  |
| (A)0hr | SEEL    | Q96RQ3 | Methylcrotonoyl-CoA carboxylase subunit alpha, mitochondrial                                 | MCCC1   | 5  | 8,14  | 8   | 10,67   |
| (A)0hr | SEEL    | Q96RQ3 | Methylcrotonoyl-CoA carboxylase subunit alpha, mitochondrial                                 | MCCC1   | 4  | 6,34  | 8   | 10,67   |
| (A)0hr | SEEL    | Q96RQ3 | Methylcrotonoyl-CoA carboxylase subunit alpha, mitochondrial                                 | MCCC1   | 7  | 11,72 | 18  | 24,00   |
| (A)0hr | SEEL    | Q96RQ3 | Methylcrotonoyl-CoA carboxylase subunit alpha, mitochondrial                                 | MCCC1   | 32 | 51,59 | 350 | 466,67  |
| (A)0hr | Control | Q9HCC0 | Methylcrotonoyl-CoA carboxylase beta chain, mitochondrial                                    | MCCC2   | 6  | 13,68 | 13  | 17,33   |
| (A)0hr | Control | Q9HCC0 | Methylcrotonoyl-CoA carboxylase beta chain, mitochondrial                                    | MCCC2   | 35 | 55,06 | 876 | 1168,00 |
| (A)0hr | SEEL    | Q9HCC0 | Methylcrotonoyl-CoA carboxylase beta chain, mitochondrial                                    | MCCC2   | 32 | 60,75 | 417 | 556,00  |
| (A)0hr | Control | P49736 | DNA replication licensing factor MCM2                                                        | MCM2    | 2  | 2,54  | 6   | 8,00    |
| (A)0hr | SEEL    | P49736 | DNA replication licensing factor MCM2                                                        | MCM2    | 2  | 2,54  | 2   | 2,67    |
| (A)0hr | Control | P25205 | DNA replication licensing factor MCM3                                                        | MCM3    | 11 | 13,24 | 19  | 25,33   |
| (A)0hr | SEEL    | P25205 | DNA replication licensing factor MCM3                                                        | MCM3    | 14 | 17,57 | 27  | 36,00   |
| (A)0hr | Control | P33991 | DNA replication licensing factor MCM4                                                        | MCM4    | 11 | 11,36 | 33  | 44,00   |
| (A)0hr | SEEL    | P33991 | DNA replication licensing factor MCM4                                                        | MCM4    | 7  | 10,78 | 14  | 18,67   |
| (A)0hr | Control | P33992 | DNA replication licensing factor MCM5                                                        | MCM5    | 16 | 21,39 | 61  | 81,33   |
| (A)0hr | SEEL    | P33992 | DNA replication licensing factor MCM5                                                        | MCM5    | 10 | 13,90 | 23  | 30,67   |
| (A)0hr | Control | Q14566 | DNA replication licensing factor MCM6                                                        | MCM6    | 11 | 14,01 | 44  | 58,67   |
| (A)0hr | SEEL    | Q14566 | DNA replication licensing factor MCM6                                                        | MCM6    | 6  | 7,55  | 12  | 16,00   |
| (A)0hr | Control | P33993 | DNA replication licensing factor MCM7                                                        | MCM7    | 32 | 48,96 | 139 | 185,33  |
| (A)0hr | SEEL    | P33993 | DNA replication licensing factor MCM7                                                        | MCM7    | 18 | 31,02 | 67  | 89,33   |
| (A)0hr | SEEL    | Q9P1T7 | MyoD family inhibitor domain-containing protein                                              | MDFIC   | 3  | 17,07 | 8   | 10,67   |
| (A)0hr | SEEL    | Q9H1U4 | Multiple epidermal growth factor-like domains protein 9                                      | MEGF9   | 13 | 19,77 | 56  | 74,67   |
| (A)0hr | SEEL    | P08581 | Hepatocyte growth factor receptor                                                            | MET     | 27 | 21,51 | 190 | 253,33  |
| (A)0hr | SEEL    | P08581 | Hepatocyte growth factor receptor                                                            | MET     | 29 | 22,59 | 176 | 234,67  |
| (A)0hr | SEEL    | P08581 | Hepatocyte growth factor receptor                                                            | MET     | 3  | 2,37  | 9   | 12,00   |
| (A)0hr | SEEL    | P55082 | Microfibril-associated glycoprotein 3                                                        | MFAP3   | 3  | 7,46  | 6   | 8,00    |
| (A)0hr | SEEL    | P08582 | Melanotransferrin                                                                            | MF12    | 2  | 2,71  | 4   | 5,33    |
| (A)0hr | SEEL    | O60291 | E3 ubiquitin-protein ligase MGRN1                                                            | MGRN1   | 9  | 23,01 | 45  | 60,00   |
| (A)0hr | Control | P46013 | Antigen KI-67                                                                                | MKI67   | 3  | 1,26  | 8   | 10,67   |
| (A)0hr | SEEL    | Q9UBG0 | C-type mannose receptor 2                                                                    | MRC2    | 22 | 18,86 | 76  | 101,33  |
| (A)0hr | Control | P43246 | DNA mismatch repair protein Msh2                                                             | MSH2    | 4  | 4,28  | 10  | 13,33   |
| (A)0hr | Control | Q86UE4 | Protein LYRIC                                                                                | MTDH    | 4  | 8,93  | 15  | 20,00   |
| (A)0hr | Control | Q6UB35 | Monofunctional C1-tetrahydrofolate synthase, mitochondrial                                   | MTHFD1L | 14 | 14,21 | 29  | 38,67   |
| (A)0hr | SEEL    | Q6UB35 | Monofunctional C1-tetrahydrofolate synthase, mitochondrial                                   | MTHFD1L | 6  | 7,67  | 12  | 16,00   |
| (A)0hr | SEEL    | P15941 | Mucin-1                                                                                      | MUC1    | 2  | 1,75  | 15  | 20,00   |

|        |         |            |                                                     |         |    |       |     |        |
|--------|---------|------------|-----------------------------------------------------|---------|----|-------|-----|--------|
| (A)0hr | Control | Q8WXI7     | Mucin-16                                            | MUC16   | 5  | 0,27  | 20  | 26,67  |
| (A)0hr | SEEL    | Q8WXI7     | Mucin-16                                            | MUC16   | 5  | 0,28  | 29  | 38,67  |
| (A)0hr | SEEL    | Q8WXI7     | Mucin-16                                            | MUC16   | 13 | 0,70  | 33  | 44,00  |
| (A)0hr | Control | Q14764     | Major vault protein                                 | MVP     | 11 | 12,88 | 22  | 29,33  |
| (A)0hr | Control | Q9BQG0     | Myb-binding protein 1A                              | MYBBP1A | 15 | 11,14 | 35  | 46,67  |
| (A)0hr | SEEL    | Q9BQG0     | Myb-binding protein 1A                              | MYBBP1A | 16 | 11,97 | 33  | 44,00  |
| (A)0hr | Control | P35580     | Myosin-10                                           | MYH10   | 2  | 1,77  | 9   | 12,00  |
| (A)0hr | Control | P35579     | Myosin-9                                            | MYH9    | 24 | 12,96 | 59  | 78,67  |
| (A)0hr | Control | Q12965     | Unconventional myosin-1e                            | MYO1E   | 7  | 6,86  | 20  | 26,67  |
| (A)0hr | SEEL    | Q9NZM1     | Myoferlin                                           | MYOF    | 8  | 4,32  | 13  | 17,33  |
| (A)0hr | SEEL    | Q9NZM1     | Myoferlin                                           | MYOF    | 51 | 28,48 | 215 | 286,67 |
| (A)0hr | SEEL    | Q9NZM1     | Myoferlin                                           | MYOF    | 6  | 3,35  | 10  | 13,33  |
| (A)0hr | Control | Q9H0A0     | N-acetyltransferase 10                              | NAT10   | 6  | 6,05  | 13  | 17,33  |
| (A)0hr | SEEL    | Q9H0A0     | N-acetyltransferase 10                              | NAT10   | 11 | 12,00 | 22  | 29,33  |
| (A)0hr | Control | P19338     | Nucleolin                                           | NCL     | 8  | 12,54 | 15  | 20,00  |
| (A)0hr | SEEL    | Q969V3     | Nicalin                                             | NCLN    | 6  | 13,14 | 22  | 29,33  |
| (A)0hr | SEEL    | Q68D85     | Natural cytotoxicity triggering receptor 3 ligand 1 | NCR3LG1 | 5  | 13,44 | 9   | 12,00  |
| (A)0hr | SEEL    | Q68D85     | Natural cytotoxicity triggering receptor 3 ligand 1 | NCR3LG1 | 13 | 27,75 | 71  | 94,67  |
| (A)0hr | SEEL    | Q92542     | Nicastrin                                           | NCSTN   | 9  | 13,54 | 49  | 65,33  |
| (A)0hr | SEEL    | Q92542     | Nicastrin                                           | NCSTN   | 13 | 20,87 | 157 | 209,33 |
| (A)0hr | SEEL    | Q92542     | Nicastrin                                           | NCSTN   | 3  | 7,90  | 6   | 8,00   |
| (A)0hr | SEEL    | Q92859     | Neogenin                                            | NEO1    | 21 | 19,23 | 69  | 92,00  |
| (A)0hr | Control | P30414     | NK-tumor recognition protein                        | NKTR    | 13 | 11,97 | 38  | 50,67  |
| (A)0hr | SEEL    | Q8NFZ4     | Neuroigin-2                                         | NLGN2   | 4  | 6,23  | 7   | 9,33   |
| (A)0hr | Control | Q13423     | NAD(P) transhydrogenase, mitochondrial              | NNT     | 11 | 9,39  | 21  | 28,00  |
| (A)0hr | Control | Q15233     | Non-POU domain-containing octamer-binding protein   | NONO    | 4  | 6,79  | 15  | 20,00  |
| (A)0hr | SEEL    | Q15233     | Non-POU domain-containing octamer-binding protein   | NONO    | 4  | 6,79  | 21  | 28,00  |
| (A)0hr | Control | O00567     | Nucleolar protein 56                                | NOP56   | 9  | 14,65 | 46  | 61,33  |
| (A)0hr | SEEL    | O00567     | Nucleolar protein 56                                | NOP56   | 8  | 12,96 | 27  | 36,00  |
| (A)0hr | Control | Q9Y2X3     | Nucleolar protein 58                                | NOP58   | 4  | 9,07  | 13  | 17,33  |
| (A)0hr | SEEL    | Q9Y2X3     | Nucleolar protein 58                                | NOP58   | 5  | 11,72 | 15  | 20,00  |
| (A)0hr | SEEL    | P46531     | Neurogenic locus notch homolog protein 1            | NOTCH1  | 5  | 2,00  | 11  | 14,67  |
| (A)0hr | SEEL    | P46531     | Neurogenic locus notch homolog protein 1            | NOTCH1  | 6  | 3,13  | 18  | 24,00  |
| (A)0hr | SEEL    | P46531     | Neurogenic locus notch homolog protein 1            | NOTCH1  | 6  | 2,58  | 19  | 25,33  |
| (A)0hr | SEEL    | Q04721     | Neurogenic locus notch homolog protein 2            | NOTCH2  | 14 | 6,19  | 87  | 116,00 |
| (A)0hr | SEEL    | Q04721     | Neurogenic locus notch homolog protein 2            | NOTCH2  | 26 | 13,07 | 141 | 188,00 |
| (A)0hr | SEEL    | Q04721     | Neurogenic locus notch homolog protein 2            | NOTCH2  | 18 | 7,93  | 84  | 112,00 |
| (A)0hr | SEEL    | Q04721     | Neurogenic locus notch homolog protein 2            | NOTCH2  | 9  | 4,33  | 38  | 50,67  |
| (A)0hr | SEEL    | P16066     | Atrial natriuretic peptide receptor 1               | NPR1    | 26 | 28,28 | 91  | 121,33 |
| (A)0hr | SEEL    | P17342     | Atrial natriuretic peptide receptor 3               | NPR3    | 15 | 30,31 | 79  | 105,33 |
| (A)0hr | SEEL    | Q9Y639     | Neuroplastin                                        | NPTN    | 8  | 20,10 | 42  | 56,00  |
| (A)0hr | SEEL    | Q9Y639     | Neuroplastin                                        | NPTN    | 9  | 21,61 | 82  | 109,33 |
| (A)0hr | SEEL    | Q92823     | Neuronal cell adhesion molecule                     | NRCAM   | 7  | 5,98  | 14  | 18,67  |
| (A)0hr | SEEL    | Q92823     | Neuronal cell adhesion molecule                     | NRCAM   | 9  | 8,59  | 18  | 24,00  |
| (A)0hr | SEEL    | O14786     | Neuropilin-1                                        | NRP1    | 11 | 14,63 | 47  | 62,67  |
| (A)0hr | SEEL    | Q59F20     | Neuropilin-1 variant (Fragment)                     | NRP1    | 21 | 34,94 | 99  | 132,00 |
| (A)0hr | SEEL    | Q68DN3     | Putative uncharacterized protein DKFZp781F1414      | NRP1    | 16 | 22,64 | 62  | 82,67  |
| (A)0hr | SEEL    | O60462     | Neuropilin-2                                        | NRP2    | 5  | 6,77  | 10  | 13,33  |
| (A)0hr | Control | Q08J23     | tRNA (cytosine(34)-C(5))-methyltransferase          | NSUN2   | 9  | 13,30 | 17  | 22,67  |
| (A)0hr | SEEL    | Q08J23     | tRNA (cytosine(34)-C(5))-methyltransferase          | NSUN2   | 4  | 5,61  | 5   | 6,67   |
| (A)0hr | SEEL    | P21589     | 5'-nucleotidase                                     | NTSE    | 13 | 28,05 | 49  | 65,33  |
| (A)0hr | SEEL    | A0A024R5M9 | Nuclear mitotic apparatus protein 1, isoform CRA_a  | NUMA1   | 38 | 21,51 | 96  | 128,00 |
| (A)0hr | Control | Q14980     | Nuclear mitotic apparatus protein 1                 | NUMA1   | 4  | 2,27  | 8   | 10,67  |
| (A)0hr | Control | Q14980     | Nuclear mitotic apparatus protein 1                 | NUMA1   | 39 | 21,56 | 106 | 141,33 |
| (A)0hr | SEEL    | Q14980     | Nuclear mitotic apparatus protein 1                 | NUMA1   | 21 | 10,54 | 47  | 62,67  |
| (A)0hr | SEEL    | O75694     | Nuclear pore complex protein Nup155                 | NUP155  | 5  | 5,32  | 7   | 9,33   |
| (A)0hr | Control | Q12769     | Nuclear pore complex protein Nup160                 | NUP160  | 3  | 2,23  | 7   | 9,33   |
| (A)0hr | Control | Q92621     | Nuclear pore complex protein Nup205                 | NUP205  | 8  | 5,37  | 15  | 20,00  |
| (A)0hr | SEEL    | Q92621     | Nuclear pore complex protein Nup205                 | NUP205  | 10 | 6,71  | 19  | 25,33  |
| (A)0hr | Control | Q8TEM1     | Nuclear pore membrane glycoprotein 210              | NUP210  | 18 | 10,39 | 50  | 66,67  |
| (A)0hr | SEEL    | Q8TEM1     | Nuclear pore membrane glycoprotein 210              | NUP210  | 15 | 8,69  | 27  | 36,00  |
| (A)0hr | SEEL    | Q8TEM1     | Nuclear pore membrane glycoprotein 210              | NUP210  | 18 | 10,17 | 42  | 56,00  |
| (A)0hr | Control | Q8N1F7     | Nuclear pore complex protein Nup93                  | NUP93   | 16 | 21,00 | 44  | 58,67  |
| (A)0hr | SEEL    | Q8N1F7     | Nuclear pore complex protein Nup93                  | NUP93   | 5  | 6,35  | 9   | 12,00  |
| (A)0hr | Control | Q9UBU9     | Nuclear RNA export factor 1                         | NXF1    | 5  | 8,56  | 10  | 13,33  |
| (A)0hr | SEEL    | Q9UBU9     | Nuclear RNA export factor 1                         | NXF1    | 12 | 21,97 | 27  | 36,00  |

|        |         |        |                                                                                |         |     |       |      |         |
|--------|---------|--------|--------------------------------------------------------------------------------|---------|-----|-------|------|---------|
| (A)0hr | Control | Q5VST9 | Obscurin                                                                       | OBSCN   | 5   | 0,77  | 9    | 12,00   |
| (A)0hr | Control | Q02218 | 2-oxoglutarate dehydrogenase, mitochondrial                                    | OGDH    | 22  | 24,24 | 104  | 138,67  |
| (A)0hr | Control | Q02218 | 2-oxoglutarate dehydrogenase, mitochondrial                                    | OGDH    | 57  | 48,78 | 886  | 1181,33 |
| (A)0hr | Control | Q02218 | 2-oxoglutarate dehydrogenase, mitochondrial                                    | OGDH    | 18  | 20,53 | 53   | 70,67   |
| (A)0hr | Control | Q9ULD0 | 2-oxoglutarate dehydrogenase-like, mitochondrial                               | OGDHL   | 3   | 2,77  | 8    | 10,67   |
| (A)0hr | SEEL    | Q99650 | Oncostatin-M-specific receptor subunit beta                                    | OSMR    | 8   | 9,09  | 16   | 21,33   |
| (A)0hr | Control | P11940 | Polyadenylate-binding protein 1                                                | PABPC1  | 8   | 13,52 | 20   | 26,67   |
| (A)0hr | SEEL    | P09874 | Poly [ADP-ribose] polymerase 1                                                 | PARP1   | 8   | 9,47  | 12   | 16,00   |
| (A)0hr | Control | Q86U86 | Protein polybromo-1                                                            | PBRM1   | 5   | 3,20  | 17   | 22,67   |
| (A)0hr | Control | P11498 | Pyruvate carboxylase, mitochondrial                                            | PC      | 39  | 39,30 | 276  | 368,00  |
| (A)0hr | Control | P11498 | Pyruvate carboxylase, mitochondrial                                            | PC      | 66  | 60,19 | 1038 | 1384,00 |
| (A)0hr | Control | P11498 | Pyruvate carboxylase, mitochondrial                                            | PC      | 87  | 73,94 | 3696 | 4928,00 |
| (A)0hr | Control | P11498 | Pyruvate carboxylase, mitochondrial                                            | PC      | 48  | 44,74 | 342  | 456,00  |
| (A)0hr | SEEL    | P11498 | Pyruvate carboxylase, mitochondrial                                            | PC      | 41  | 40,15 | 257  | 342,67  |
| (A)0hr | SEEL    | P11498 | Pyruvate carboxylase, mitochondrial                                            | PC      | 57  | 54,16 | 556  | 741,33  |
| (A)0hr | SEEL    | P11498 | Pyruvate carboxylase, mitochondrial                                            | PC      | 77  | 75,04 | 1771 | 2361,33 |
| (A)0hr | SEEL    | P11498 | Pyruvate carboxylase, mitochondrial                                            | PC      | 35  | 37,35 | 185  | 246,67  |
| (A)0hr | Control | P05165 | Propionyl-CoA carboxylase alpha chain, mitochondrial                           | PCCA    | 17  | 21,15 | 48   | 64,00   |
| (A)0hr | Control | P05165 | Propionyl-CoA carboxylase alpha chain, mitochondrial                           | PCCA    | 50  | 61,68 | 808  | 1077,33 |
| (A)0hr | SEEL    | P05165 | Propionyl-CoA carboxylase alpha chain, mitochondrial                           | PCCA    | 5   | 7,01  | 9    | 12,00   |
| (A)0hr | SEEL    | P05165 | Propionyl-CoA carboxylase alpha chain, mitochondrial                           | PCCA    | 44  | 58,52 | 479  | 638,67  |
| (A)0hr | Control | P05166 | Propionyl-CoA carboxylase beta chain, mitochondrial                            | PCCB    | 3   | 6,68  | 9    | 12,00   |
| (A)0hr | Control | P05166 | Propionyl-CoA carboxylase beta chain, mitochondrial                            | PCCB    | 5   | 10,76 | 16   | 21,33   |
| (A)0hr | SEEL    | P05166 | Propionyl-CoA carboxylase beta chain, mitochondrial                            | PCCB    | 4   | 10,39 | 9    | 12,00   |
| (A)0hr | SEEL    | F5GWJ1 | Protocadherin-7                                                                | PCDH7   | 23  | 22,39 | 131  | 174,67  |
| (A)0hr | SEEL    | O60245 | Protocadherin-7                                                                | PCDH7   | 18  | 22,26 | 137  | 182,67  |
| (A)0hr | SEEL    | O60245 | Protocadherin-7                                                                | PCDH7   | 6   | 7,20  | 20   | 26,67   |
| (A)0hr | SEEL    | Q9H6A9 | Pecanex-like protein 3                                                         | PCNXL3  | 6   | 2,95  | 14   | 18,67   |
| (A)0hr | SEEL    | Q9H6A9 | Pecanex-like protein 3                                                         | PCNXL3  | 8   | 4,38  | 17   | 22,67   |
| (A)0hr | SEEL    | Q8WUM4 | Programmed cell death 6-interacting protein                                    | PDZD6IP | 9   | 10,25 | 20   | 26,67   |
| (A)0hr | Control | P08559 | Pyruvate dehydrogenase E1 component subunit alpha, somatic form, mitochondrial | PDHA1   | 9   | 18,21 | 28   | 37,33   |
| (A)0hr | Control | P08559 | Pyruvate dehydrogenase E1 component subunit alpha, somatic form, mitochondrial | PDHA1   | 5   | 12,05 | 14   | 18,67   |
| (A)0hr | SEEL    | O00541 | Pescadillo homolog                                                             | PES1    | 5   | 9,69  | 15   | 20,00   |
| (A)0hr | SEEL    | M4QHP2 | PIEZO1                                                                         | PIEZO1  | 3   | 1,43  | 30   | 40,00   |
| (A)0hr | SEEL    | Q92508 | Piezo-type mechanosensitive ion channel component 1                            | PIEZO1  | 4   | 1,82  | 54   | 72,00   |
| (A)0hr | SEEL    | Q92508 | Piezo-type mechanosensitive ion channel component 1                            | PIEZO1  | 22  | 12,65 | 63   | 84,00   |
| (A)0hr | SEEL    | Q9H5I5 | Piezo-type mechanosensitive ion channel component 2                            | PIEZO2  | 17  | 7,09  | 38   | 50,67   |
| (A)0hr | Control | P14618 | Pyruvate kinase PKM                                                            | PKM     | 22  | 43,50 | 75   | 100,00  |
| (A)0hr | SEEL    | P14618 | Pyruvate kinase PKM                                                            | PKM     | 2   | 3,95  | 3    | 4,00    |
| (A)0hr | SEEL    | P14618 | Pyruvate kinase PKM                                                            | PKM     | 4   | 9,42  | 28   | 37,33   |
| (A)0hr | Control | Q99959 | Plakophilin-2                                                                  | PKP2    | 4   | 4,65  | 6    | 8,00    |
| (A)0hr | SEEL    | Q8IV08 | Phospholipase D3                                                               | PLD3    | 4   | 7,35  | 6    | 8,00    |
| (A)0hr | Control | Q15149 | Plectin                                                                        | PLEC    | 76  | 17,27 | 186  | 248,00  |
| (A)0hr | Control | Q15149 | Plectin                                                                        | PLEC    | 77  | 17,51 | 183  | 244,00  |
| (A)0hr | SEEL    | Q15149 | Plectin                                                                        | PLEC    | 110 | 24,66 | 300  | 400,00  |
| (A)0hr | SEEL    | Q15149 | Plectin                                                                        | PLEC    | 67  | 15,95 | 150  | 200,00  |
| (A)0hr | SEEL    | Q15149 | Plectin                                                                        | PLEC    | 5   | 0,94  | 10   | 13,33   |
| (A)0hr | SEEL    | O00469 | Procollagen-lysine,2-oxoglutarate 5-dioxygenase 2                              | PLOD2   | 6   | 8,55  | 13   | 17,33   |
| (A)0hr | SEEL    | Q9UIW2 | Plexin-A1                                                                      | PLXNA1  | 15  | 7,91  | 40   | 53,33   |
| (A)0hr | SEEL    | Q9UIW2 | Plexin-A1                                                                      | PLXNA1  | 61  | 38,34 | 461  | 614,67  |
| (A)0hr | SEEL    | Q9UIW2 | Plexin-A1                                                                      | PLXNA1  | 7   | 3,85  | 17   | 22,67   |
| (A)0hr | SEEL    | O75051 | Plexin-A2                                                                      | PLXNA2  | 9   | 5,49  | 19   | 25,33   |
| (A)0hr | SEEL    | O43157 | Plexin-B1                                                                      | PLXNB1  | 2   | 1,78  | 6    | 8,00    |
| (A)0hr | SEEL    | O43157 | Plexin-B1                                                                      | PLXNB1  | 8   | 5,57  | 31   | 41,33   |
| (A)0hr | SEEL    | O43157 | Plexin-B1                                                                      | PLXNB1  | 21  | 11,99 | 78   | 104,00  |
| (A)0hr | SEEL    | O43157 | Plexin-B1                                                                      | PLXNB1  | 7   | 4,59  | 27   | 36,00   |
| (A)0hr | SEEL    | A0PK02 | PLXNB2 protein                                                                 | PLXNB2  | 2   | 6,32  | 7    | 9,33    |
| (A)0hr | SEEL    | O15031 | Plexin-B2                                                                      | PLXNB2  | 7   | 4,24  | 19   | 25,33   |
| (A)0hr | SEEL    | O15031 | Plexin-B2                                                                      | PLXNB2  | 36  | 24,86 | 339  | 452,00  |
| (A)0hr | SEEL    | O15031 | Plexin-B2                                                                      | PLXNB2  | 47  | 23,45 | 381  | 508,00  |
| (A)0hr | SEEL    | O15031 | Plexin-B2                                                                      | PLXNB2  | 32  | 17,68 | 342  | 456,00  |
| (A)0hr | SEEL    | Q9Y4D7 | Plexin-D1                                                                      | PLXND1  | 10  | 6,70  | 22   | 29,33   |
| (A)0hr | SEEL    | Q9Y4D7 | Plexin-D1                                                                      | PLXND1  | 29  | 20,36 | 191  | 254,67  |
| (A)0hr | Control | O00592 | Podocalyxin                                                                    | PODXL   | 4   | 7,89  | 14   | 18,67   |
| (A)0hr | SEEL    | O00592 | Podocalyxin                                                                    | PODXL   | 8   | 14,87 | 51   | 68,00   |
| (A)0hr | SEEL    | O00592 | Podocalyxin                                                                    | PODXL   | 18  | 26,88 | 341  | 454,67  |

|        |         |        |                                                               |         |     |       |     |        |
|--------|---------|--------|---------------------------------------------------------------|---------|-----|-------|-----|--------|
| (A)0hr | SEEL    | O00592 | Podocalyxin                                                   | PODXL   | 5   | 9,14  | 12  | 16,00  |
| (A)0hr | SEEL    | O00592 | Podocalyxin                                                   | PODXL   | 5   | 9,68  | 17  | 22,67  |
| (A)0hr | SEEL    | Q9NZ53 | Podocalyxin-like protein 2                                    | PODXL2  | 2   | 4,13  | 10  | 13,33  |
| (A)0hr | Control | P78527 | DNA-dependent protein kinase catalytic subunit                | PRKDC   | 50  | 12,33 | 130 | 173,33 |
| (A)0hr | Control | P78527 | DNA-dependent protein kinase catalytic subunit                | PRKDC   | 24  | 5,84  | 49  | 65,33  |
| (A)0hr | SEEL    | P78527 | DNA-dependent protein kinase catalytic subunit                | PRKDC   | 116 | 28,13 | 454 | 605,33 |
| (A)0hr | SEEL    | P78527 | DNA-dependent protein kinase catalytic subunit                | PRKDC   | 22  | 5,67  | 40  | 53,33  |
| (A)0hr | Control | O75400 | Pre-mRNA-processing factor 40 homolog A                       | PRPF40A | 3   | 3,24  | 9   | 12,00  |
| (A)0hr | Control | Q13523 | Serine/threonine-protein kinase PRP4 homolog                  | PRPF4B  | 10  | 10,53 | 29  | 38,67  |
| (A)0hr | Control | Q13523 | Serine/threonine-protein kinase PRP4 homolog                  | PRPF4B  | 24  | 23,44 | 91  | 121,33 |
| (A)0hr | Control | Q13523 | Serine/threonine-protein kinase PRP4 homolog                  | PRPF4B  | 3   | 3,18  | 5   | 6,67   |
| (A)0hr | SEEL    | Q13523 | Serine/threonine-protein kinase PRP4 homolog                  | PRPF4B  | 5   | 4,67  | 7   | 9,33   |
| (A)0hr | SEEL    | Q13523 | Serine/threonine-protein kinase PRP4 homolog                  | PRPF4B  | 7   | 7,94  | 19  | 25,33  |
| (A)0hr | Control | O94906 | Pre-mRNA-processing factor 6                                  | PRPF6   | 3   | 2,98  | 6   | 8,00   |
| (A)0hr | Control | Q6P2Q9 | Pre-mRNA-processing-splicing factor 8                         | PRPF8   | 39  | 16,19 | 116 | 154,67 |
| (A)0hr | SEEL    | Q6P2Q9 | Pre-mRNA-processing-splicing factor 8                         | PRPF8   | 15  | 6,04  | 30  | 40,00  |
| (A)0hr | SEEL    | P0CW18 | Serine protease 56                                            | PRSS56  | 13  | 22,72 | 60  | 80,00  |
| (A)0hr | SEEL    | P07602 | Prosaposin                                                    | PSAP    | 9   | 16,79 | 30  | 40,00  |
| (A)0hr | Control | Q13200 | 26S proteasome non-ATPase regulatory subunit 2                | PSMD2   | 4   | 5,29  | 8   | 10,67  |
| (A)0hr | Control | O43242 | 26S proteasome non-ATPase regulatory subunit 3                | PSMD3   | 15  | 29,78 | 43  | 57,33  |
| (A)0hr | SEEL    | O43242 | 26S proteasome non-ATPase regulatory subunit 3                | PSMD3   | 15  | 30,52 | 37  | 49,33  |
| (A)0hr | SEEL    | P26599 | Polypyrimidine tract-binding protein 1                        | PTBP1   | 6   | 14,69 | 19  | 25,33  |
| (A)0hr | SEEL    | Q9P2B2 | Prostaglandin F2 receptor negative regulator                  | PTGFRN  | 9   | 9,90  | 22  | 29,33  |
| (A)0hr | SEEL    | Q9P2B2 | Prostaglandin F2 receptor negative regulator                  | PTGFRN  | 4   | 3,53  | 34  | 45,33  |
| (A)0hr | SEEL    | Q9P2B2 | Prostaglandin F2 receptor negative regulator                  | PTGFRN  | 4   | 3,53  | 61  | 81,33  |
| (A)0hr | SEEL    | Q9P2B2 | Prostaglandin F2 receptor negative regulator                  | PTGFRN  | 3   | 3,41  | 13  | 17,33  |
| (A)0hr | SEEL    | Q13308 | Inactive tyrosine-protein kinase 7                            | PTK7    | 13  | 13,46 | 31  | 41,33  |
| (A)0hr | SEEL    | Q9P035 | Very-long-chain (3R)-3-hydroxyacyl-CoA dehydratase 3          | PTPLAD1 | 5   | 14,36 | 14  | 18,67  |
| (A)0hr | SEEL    | Q9P035 | Very-long-chain (3R)-3-hydroxyacyl-CoA dehydratase 3          | PTPLAD1 | 2   | 9,67  | 6   | 8,00   |
| (A)0hr | SEEL    | P18433 | Receptor-type tyrosine-protein phosphatase alpha              | PTPRA   | 29  | 37,78 | 191 | 254,67 |
| (A)0hr | SEEL    | P10586 | Receptor-type tyrosine-protein phosphatase F                  | PTPRF   | 5   | 3,25  | 7   | 9,33   |
| (A)0hr | SEEL    | P10586 | Receptor-type tyrosine-protein phosphatase F                  | PTPRF   | 51  | 34,14 | 494 | 658,67 |
| (A)0hr | SEEL    | P10586 | Receptor-type tyrosine-protein phosphatase F                  | PTPRF   | 50  | 34,82 | 307 | 409,33 |
| (A)0hr | SEEL    | P10586 | Receptor-type tyrosine-protein phosphatase F                  | PTPRF   | 5   | 3,15  | 12  | 16,00  |
| (A)0hr | SEEL    | P23470 | Receptor-type tyrosine-protein phosphatase gamma              | PTPRG   | 32  | 26,71 | 215 | 286,67 |
| (A)0hr | SEEL    | P23470 | Receptor-type tyrosine-protein phosphatase gamma              | PTPRG   | 3   | 2,01  | 5   | 6,67   |
| (A)0hr | SEEL    | P23470 | Receptor-type tyrosine-protein phosphatase gamma              | PTPRG   | 2   | 1,73  | 4   | 5,33   |
| (A)0hr | SEEL    | Q12913 | Receptor-type tyrosine-protein phosphatase eta                | PTPRJ   | 10  | 10,32 | 32  | 42,67  |
| (A)0hr | SEEL    | Q12913 | Receptor-type tyrosine-protein phosphatase eta                | PTPRJ   | 30  | 26,25 | 270 | 360,00 |
| (A)0hr | SEEL    | Q12913 | Receptor-type tyrosine-protein phosphatase eta                | PTPRJ   | 2   | 1,94  | 3   | 4,00   |
| (A)0hr | SEEL    | E9PGC5 | Receptor-type tyrosine-protein phosphatase kappa              | PTPRK   | 29  | 24,39 | 156 | 208,00 |
| (A)0hr | SEEL    | D6W632 | Protein tyrosine phosphatase, receptor type, S, isoform CRA_b | PTPRS   | 2   | 3,19  | 10  | 13,33  |
| (A)0hr | SEEL    | Q13332 | Receptor-type tyrosine-protein phosphatase S                  | PTPRS   | 17  | 12,06 | 172 | 229,33 |
| (A)0hr | SEEL    | Q13332 | Receptor-type tyrosine-protein phosphatase S                  | PTPRS   | 20  | 16,38 | 72  | 96,00  |
| (A)0hr | SEEL    | Q13332 | Receptor-type tyrosine-protein phosphatase S                  | PTPRS   | 8   | 5,29  | 27  | 36,00  |
| (A)0hr | Control | Q9UHX1 | Poly(U)-binding-splicing factor PUF60                         | PUF60   | 13  | 25,76 | 49  | 65,33  |
| (A)0hr | SEEL    | Q9UHX1 | Poly(U)-binding-splicing factor PUF60                         | PUF60   | 13  | 29,34 | 38  | 50,67  |
| (A)0hr | SEEL    | A8K411 | cDNA FLJ75404                                                 | PVR     | 9   | 23,26 | 53  | 70,67  |
| (A)0hr | SEEL    | A8K411 | cDNA FLJ75404                                                 | PVR     | 10  | 24,70 | 304 | 405,33 |
| (A)0hr | SEEL    | P15151 | Poliovirus receptor                                           | PVR     | 4   | 11,03 | 12  | 16,00  |
| (A)0hr | SEEL    | Q15223 | Nectin-1                                                      | PVRL1   | 3   | 6,38  | 10  | 13,33  |
| (A)0hr | SEEL    | Q92692 | Nectin-2                                                      | PVRL2   | 5   | 10,04 | 14  | 18,67  |
| (A)0hr | SEEL    | Q92692 | Nectin-2                                                      | PVRL2   | 3   | 6,69  | 20  | 26,67  |
| (A)0hr | SEEL    | Q9UEI6 | Polio virus related protein 2, alpha isoform (Fragment)       | PVRL2   | 2   | 4,45  | 33  | 44,00  |
| (A)0hr | SEEL    | Q9NQS3 | Nectin-3                                                      | PVRL3   | 11  | 20,58 | 34  | 45,33  |
| (A)0hr | SEEL    | Q92626 | Peroxidasin homolog                                           | PXDN    | 5   | 3,38  | 9   | 12,00  |
| (A)0hr | SEEL    | Q6ZRP7 | Sulfhydryl oxidase 2                                          | QSOX2   | 17  | 28,94 | 60  | 80,00  |
| (A)0hr | SEEL    | P61026 | Ras-related protein Rab-10                                    | RAB10   | 5   | 29,00 | 15  | 20,00  |
| (A)0hr | SEEL    | P62826 | GTP-binding nuclear protein Ran                               | RAN     | 5   | 19,91 | 10  | 13,33  |
| (A)0hr | SEEL    | P49792 | E3 SUMO-protein ligase RanBP2                                 | RANBP2  | 5   | 1,52  | 7   | 9,33   |
| (A)0hr | SEEL    | P54136 | Arginine-tRNA ligase, cytoplasmic                             | RARS    | 7   | 10,30 | 10  | 13,33  |
| (A)0hr | Control | Q7Z6E9 | E3 ubiquitin-protein ligase RBBP6                             | RBBP6   | 5   | 2,85  | 8   | 10,67  |
| (A)0hr | Control | Q7Z6E9 | E3 ubiquitin-protein ligase RBBP6                             | RBBP6   | 12  | 6,03  | 35  | 46,67  |
| (A)0hr | Control | Q96PK6 | RNA-binding protein 14                                        | RBM14   | 15  | 25,41 | 48  | 64,00  |
| (A)0hr | SEEL    | Q96PK6 | RNA-binding protein 14                                        | RBM14   | 16  | 25,86 | 61  | 81,33  |
| (A)0hr | Control | Q96T37 | Putative RNA-binding protein 15                               | RBM15   | 2   | 3,28  | 4   | 5,33   |

|        |         |            |                                                                                                                                                     |         |    |       |     |        |
|--------|---------|------------|-----------------------------------------------------------------------------------------------------------------------------------------------------|---------|----|-------|-----|--------|
| (A)0hr | Control | P49756     | RNA-binding protein 25                                                                                                                              | RBM25   | 3  | 4,98  | 8   | 10,67  |
| (A)0hr | Control | Q14498     | RNA-binding protein 39                                                                                                                              | RBM39   | 4  | 9,06  | 8   | 10,67  |
| (A)0hr | SEEL    | Q14498     | RNA-binding protein 39                                                                                                                              | RBM39   | 4  | 9,06  | 7   | 9,33   |
| (A)0hr | SEEL    | Q2M1J3     | ROBO1 protein                                                                                                                                       | ROBO1   | 38 | 27,26 | 319 | 425,33 |
| (A)0hr | SEEL    | Q9Y6N7     | Roundabout homolog 1                                                                                                                                | ROBO1   | 22 | 16,84 | 60  | 80,00  |
| (A)0hr | SEEL    | Q9Y6N7     | Roundabout homolog 1                                                                                                                                | ROBO1   | 53 | 35,80 | 532 | 709,33 |
| (A)0hr | SEEL    | Q01974     | Tyrosine-protein kinase transmembrane receptor ROR2                                                                                                 | ROR2    | 9  | 10,07 | 19  | 25,33  |
| (A)0hr | SEEL    | Q01974     | Tyrosine-protein kinase transmembrane receptor ROR2                                                                                                 | ROR2    | 23 | 21,42 | 150 | 200,00 |
| (A)0hr | SEEL    | Q01974     | Tyrosine-protein kinase transmembrane receptor ROR2                                                                                                 | ROR2    | 7  | 8,70  | 25  | 33,33  |
| (A)0hr | SEEL    | M0QYS1     | 60S ribosomal protein L13a (Fragment)                                                                                                               | RPL13A  | 5  | 19,05 | 11  | 14,67  |
| (A)0hr | SEEL    | Q5QTS3     | FWP004                                                                                                                                              | RPL13A  | 8  | 31,03 | 19  | 25,33  |
| (A)0hr | SEEL    | P61313     | 60S ribosomal protein L15                                                                                                                           | RPL15   | 5  | 25,98 | 22  | 29,33  |
| (A)0hr | SEEL    | P39023     | 60S ribosomal protein L3                                                                                                                            | RPL3    | 5  | 9,18  | 11  | 14,67  |
| (A)0hr | SEEL    | P39023     | 60S ribosomal protein L3                                                                                                                            | RPL3    | 3  | 7,20  | 8   | 10,67  |
| (A)0hr | Control | P04843     | Dolichyl-diphosphooligosaccharide--protein glycosyltransferase subunit 1                                                                            | RPN1    | 14 | 25,04 | 44  | 58,67  |
| (A)0hr | SEEL    | P04843     | Dolichyl-diphosphooligosaccharide--protein glycosyltransferase subunit 1                                                                            | RPN1    | 18 | 31,47 | 64  | 85,33  |
| (A)0hr | Control | P04844     | Dolichyl-diphosphooligosaccharide--protein glycosyltransferase subunit 2                                                                            | RPN2    | 10 | 19,97 | 46  | 61,33  |
| (A)0hr | SEEL    | P04844     | Dolichyl-diphosphooligosaccharide--protein glycosyltransferase subunit 2                                                                            | RPN2    | 12 | 24,41 | 64  | 85,33  |
| (A)0hr | SEEL    | P62280     | 40S ribosomal protein S11                                                                                                                           | RPS11   | 5  | 24,05 | 15  | 20,00  |
| (A)0hr | SEEL    | P62280     | 40S ribosomal protein S11                                                                                                                           | RPS11   | 4  | 23,42 | 8   | 10,67  |
| (A)0hr | SEEL    | P15880     | 40S ribosomal protein S2                                                                                                                            | RPS2    | 5  | 17,75 | 10  | 13,33  |
| (A)0hr | SEEL    | P15880     | 40S ribosomal protein S2                                                                                                                            | RPS2    | 5  | 17,75 | 16  | 21,33  |
| (A)0hr | SEEL    | P15880     | 40S ribosomal protein S2                                                                                                                            | RPS2    | 3  | 10,92 | 6   | 8,00   |
| (A)0hr | SEEL    | P15880     | 40S ribosomal protein S2                                                                                                                            | RPS2    | 6  | 20,14 | 26  | 34,67  |
| (A)0hr | SEEL    | P62266     | 40S ribosomal protein S23                                                                                                                           | RPS23   | 4  | 29,37 | 12  | 16,00  |
| (A)0hr | SEEL    | P62266     | 40S ribosomal protein S23                                                                                                                           | RPS23   | 4  | 22,38 | 8   | 10,67  |
| (A)0hr | SEEL    | P23396     | 40S ribosomal protein S3                                                                                                                            | RPS3    | 8  | 32,92 | 21  | 28,00  |
| (A)0hr | SEEL    | P23396     | 40S ribosomal protein S3                                                                                                                            | RPS3    | 9  | 31,69 | 25  | 33,33  |
| (A)0hr | SEEL    | P23396     | 40S ribosomal protein S3                                                                                                                            | RPS3    | 9  | 35,80 | 26  | 34,67  |
| (A)0hr | SEEL    | P62753     | 40S ribosomal protein S6                                                                                                                            | RPS6    | 3  | 12,85 | 12  | 16,00  |
| (A)0hr | SEEL    | P62753     | 40S ribosomal protein S6                                                                                                                            | RPS6    | 3  | 12,85 | 13  | 17,33  |
| (A)0hr | SEEL    | P46781     | 40S ribosomal protein S9                                                                                                                            | RPS9    | 5  | 25,77 | 12  | 16,00  |
| (A)0hr | SEEL    | P46781     | 40S ribosomal protein S9                                                                                                                            | RPS9    | 6  | 28,35 | 13  | 17,33  |
| (A)0hr | Control | Q9P2E9     | Ribosome-binding protein 1                                                                                                                          | RRBP1   | 8  | 6,52  | 13  | 17,33  |
| (A)0hr | Control | P23921     | Ribonucleoside-diphosphate reductase large subunit                                                                                                  | RRM1    | 6  | 8,84  | 14  | 18,67  |
| (A)0hr | SEEL    | Q5JTH9     | RRP12-like protein                                                                                                                                  | RRP12   | 4  | 3,08  | 8   | 10,67  |
| (A)0hr | SEEL    | Q86UN3     | Reticulon-4 receptor-like 2                                                                                                                         | RTN4RL2 | 11 | 28,81 | 80  | 106,67 |
| (A)0hr | SEEL    | P34925     | Tyrosine-protein kinase RYK                                                                                                                         | RYK     | 4  | 6,79  | 11  | 14,67  |
| (A)0hr | SEEL    | Q6UWP8     | Suprabasin                                                                                                                                          | SBSN    | 2  | 6,10  | 3   | 4,00   |
| (A)0hr | SEEL    | AOA024RBS4 | Scavenger receptor class B, member 1, isoform CRA_b                                                                                                 | SCARB1  | 12 | 21,02 | 72  | 96,00  |
| (A)0hr | SEEL    | AOA024RBS4 | Scavenger receptor class B, member 1, isoform CRA_b                                                                                                 | SCARB1  | 15 | 28,09 | 132 | 176,00 |
| (A)0hr | Control | Q14160     | Protein scribble homolog                                                                                                                            | SCRIB   | 5  | 2,82  | 10  | 13,33  |
| (A)0hr | SEEL    | Q14160     | Protein scribble homolog                                                                                                                            | SCRIB   | 6  | 3,62  | 10  | 13,33  |
| (A)0hr | Control | P31040     | Succinate dehydrogenase [ubiquinone] flavoprotein subunit, mitochondrial                                                                            | SDHA    | 7  | 12,05 | 23  | 30,67  |
| (A)0hr | SEEL    | P31040     | Succinate dehydrogenase [ubiquinone] flavoprotein subunit, mitochondrial                                                                            | SDHA    | 6  | 11,45 | 25  | 33,33  |
| (A)0hr | Control | B4DSQ5     | cDNA FLJ53608, highly similar to Protein transport protein Sec23A                                                                                   | SEC23A  | 5  | 7,07  | 11  | 14,67  |
| (A)0hr | Control | P53992     | Protein transport protein Sec24C                                                                                                                    | SEC24C  | 4  | 4,39  | 9   | 12,00  |
| (A)0hr | SEEL    | Q9C0C4     | Semaphorin-4C                                                                                                                                       | SEMA4C  | 3  | 5,28  | 4   | 5,33   |
| (A)0hr | SEEL    | Q8Nfy4     | Semaphorin-6D                                                                                                                                       | SEMA6D  | 6  | 5,31  | 15  | 20,00  |
| (A)0hr | SEEL    | B3KNK2     | cDNA FLJ14770 fis, clone NT2RP3004207, highly similar to Homo sapiens seizure related 6 homolog (mouse)-like 2 (SEZ6L2), transcript variant 1, mRNA | SEZ6L2  | 6  | 8,16  | 14  | 18,67  |
| (A)0hr | SEEL    | O75533     | Splicing factor 3B subunit 1                                                                                                                        | SF3B1   | 5  | 3,99  | 14  | 18,67  |
| (A)0hr | Control | P23246     | Splicing factor, proline- and glutamine-rich                                                                                                        | SFPQ    | 5  | 8,77  | 17  | 22,67  |
| (A)0hr | SEEL    | P23246     | Splicing factor, proline- and glutamine-rich                                                                                                        | SFPQ    | 4  | 6,22  | 14  | 18,67  |
| (A)0hr | SEEL    | P78324     | Tyrosine-protein phosphatase non-receptor type substrate 1                                                                                          | SIRPA   | 7  | 18,06 | 39  | 52,00  |
| (A)0hr | SEEL    | P55011     | Solute carrier family 12 member 2                                                                                                                   | SLC12A2 | 10 | 11,39 | 25  | 33,33  |
| (A)0hr | SEEL    | P55011     | Solute carrier family 12 member 2                                                                                                                   | SLC12A2 | 11 | 11,55 | 20  | 26,67  |
| (A)0hr | SEEL    | Q9Y666     | Solute carrier family 12 member 7                                                                                                                   | SLC12A7 | 13 | 13,11 | 43  | 57,33  |
| (A)0hr | SEEL    | Q9Y666     | Solute carrier family 12 member 7                                                                                                                   | SLC12A7 | 26 | 25,58 | 146 | 194,67 |
| (A)0hr | SEEL    | Q9Y666     | Solute carrier family 12 member 7                                                                                                                   | SLC12A7 | 5  | 6,00  | 25  | 33,33  |
| (A)0hr | Control | B4E106     | cDNA FLJ53399, highly similar to Monocarboxylate transporter 1                                                                                      | SLC16A1 | 3  | 11,04 | 8   | 10,67  |
| (A)0hr | Control | B4E106     | cDNA FLJ53399, highly similar to Monocarboxylate transporter 1                                                                                      | SLC16A1 | 2  | 8,54  | 8   | 10,67  |
| (A)0hr | SEEL    | B4E106     | cDNA FLJ53399, highly similar to Monocarboxylate transporter 1                                                                                      | SLC16A1 | 5  | 11,25 | 24  | 32,00  |
| (A)0hr | SEEL    | B4E106     | cDNA FLJ53399, highly similar to Monocarboxylate transporter 1                                                                                      | SLC16A1 | 5  | 11,25 | 33  | 44,00  |
| (A)0hr | SEEL    | B4E106     | cDNA FLJ53399, highly similar to Monocarboxylate transporter 1                                                                                      | SLC16A1 | 3  | 11,04 | 16  | 21,33  |
| (A)0hr | SEEL    | B4E106     | cDNA FLJ53399, highly similar to Monocarboxylate transporter 1                                                                                      | SLC16A1 | 4  | 11,04 | 22  | 29,33  |
| (A)0hr | Control | O15427     | Monocarboxylate transporter 4                                                                                                                       | SLC16A3 | 3  | 7,31  | 9   | 12,00  |



|        |         |            |                                                                   |          |    |       |      |         |
|--------|---------|------------|-------------------------------------------------------------------|----------|----|-------|------|---------|
| (A)0hr | SEEL    | O15427     | Monocarboxylate transporter 4                                     | SLC16A3  | 3  | 7,31  | 10   | 13,33   |
| (A)0hr | SEEL    | O15427     | Monocarboxylate transporter 4                                     | SLC16A3  | 3  | 7,31  | 19   | 25,33   |
| (A)0hr | SEEL    | O15427     | Monocarboxylate transporter 4                                     | SLC16A3  | 3  | 7,31  | 8    | 10,67   |
| (A)0hr | SEEL    | O15427     | Monocarboxylate transporter 4                                     | SLC16A3  | 2  | 5,59  | 12   | 16,00   |
| (A)0hr | Control | Q15758     | Neutral amino acid transporter B(0)                               | SLC1A5   | 6  | 13,31 | 14   | 18,67   |
| (A)0hr | SEEL    | Q15758     | Neutral amino acid transporter B(0)                               | SLC1A5   | 4  | 9,80  | 8    | 10,67   |
| (A)0hr | SEEL    | Q15758     | Neutral amino acid transporter B(0)                               | SLC1A5   | 6  | 14,05 | 24   | 32,00   |
| (A)0hr | SEEL    | Q15758     | Neutral amino acid transporter B(0)                               | SLC1A5   | 7  | 15,90 | 25   | 33,33   |
| (A)0hr | SEEL    | Q15758     | Neutral amino acid transporter B(0)                               | SLC1A5   | 10 | 22,00 | 74   | 98,67   |
| (A)0hr | Control | O75746     | Calcium-binding mitochondrial carrier protein Aralar1             | SLC25A12 | 2  | 2,95  | 4    | 5,33    |
| (A)0hr | SEEL    | O75746     | Calcium-binding mitochondrial carrier protein Aralar1             | SLC25A12 | 4  | 7,08  | 7    | 9,33    |
| (A)0hr | Control | Q9UJS0     | Calcium-binding mitochondrial carrier protein Aralar2             | SLC25A13 | 13 | 20,15 | 46   | 61,33   |
| (A)0hr | SEEL    | Q9UJS0     | Calcium-binding mitochondrial carrier protein Aralar2             | SLC25A13 | 15 | 28,00 | 61   | 81,33   |
| (A)0hr | SEEL    | Q00325     | Phosphate carrier protein, mitochondrial                          | SLC25A3  | 7  | 15,47 | 31   | 41,33   |
| (A)0hr | SEEL    | Q00325     | Phosphate carrier protein, mitochondrial                          | SLC25A3  | 7  | 15,47 | 31   | 41,33   |
| (A)0hr | Control | P05141     | ADP/ATP translocase 2                                             | SLC25A5  | 2  | 8,05  | 6    | 8,00    |
| (A)0hr | Control | P05141     | ADP/ATP translocase 2                                             | SLC25A5  | 6  | 17,79 | 11   | 14,67   |
| (A)0hr | SEEL    | P05141     | ADP/ATP translocase 2                                             | SLC25A5  | 3  | 11,41 | 18   | 24,00   |
| (A)0hr | SEEL    | P05141     | ADP/ATP translocase 2                                             | SLC25A5  | 3  | 11,41 | 19   | 25,33   |
| (A)0hr | SEEL    | P05141     | ADP/ATP translocase 2                                             | SLC25A5  | 3  | 11,41 | 10   | 13,33   |
| (A)0hr | SEEL    | P05141     | ADP/ATP translocase 2                                             | SLC25A5  | 3  | 11,41 | 13   | 17,33   |
| (A)0hr | Control | P12236     | ADP/ATP translocase 3                                             | SLC25A6  | 2  | 8,05  | 8    | 10,67   |
| (A)0hr | SEEL    | P12236     | ADP/ATP translocase 3                                             | SLC25A6  | 3  | 10,07 | 13   | 17,33   |
| (A)0hr | SEEL    | P12236     | ADP/ATP translocase 3                                             | SLC25A6  | 2  | 8,05  | 8    | 10,67   |
| (A)0hr | SEEL    | Q99808     | Equilibrative nucleoside transporter 1                            | SLC29A1  | 2  | 6,58  | 8    | 10,67   |
| (A)0hr | SEEL    | P11166     | Solute carrier family 2, facilitated glucose transporter member 1 | SLC2A1   | 4  | 11,99 | 16   | 21,33   |
| (A)0hr | SEEL    | P11166     | Solute carrier family 2, facilitated glucose transporter member 1 | SLC2A1   | 4  | 11,99 | 16   | 21,33   |
| (A)0hr | SEEL    | P11166     | Solute carrier family 2, facilitated glucose transporter member 1 | SLC2A1   | 4  | 11,99 | 11   | 14,67   |
| (A)0hr | SEEL    | P11166     | Solute carrier family 2, facilitated glucose transporter member 1 | SLC2A1   | 4  | 11,99 | 14   | 18,67   |
| (A)0hr | SEEL    | P11169     | Solute carrier family 2, facilitated glucose transporter member 3 | SLC2A3   | 3  | 5,44  | 11   | 14,67   |
| (A)0hr | SEEL    | P11169     | Solute carrier family 2, facilitated glucose transporter member 3 | SLC2A3   | 4  | 9,48  | 17   | 22,67   |
| (A)0hr | SEEL    | P11169     | Solute carrier family 2, facilitated glucose transporter member 3 | SLC2A3   | 2  | 4,03  | 6    | 8,00    |
| (A)0hr | SEEL    | Q9Y6M5     | Zinc transporter 1                                                | SLC30A1  | 11 | 23,47 | 38   | 50,67   |
| (A)0hr | SEEL    | Q9Y6M5     | Zinc transporter 1                                                | SLC30A1  | 7  | 17,16 | 18   | 24,00   |
| (A)0hr | SEEL    | Q9Y6M5     | Zinc transporter 1                                                | SLC30A1  | 7  | 17,95 | 29   | 38,67   |
| (A)0hr | SEEL    | Q9H2H9     | Sodium-coupled neutral amino acid transporter 1                   | SLC38A1  | 5  | 9,03  | 16   | 21,33   |
| (A)0hr | SEEL    | Q9H2H9     | Sodium-coupled neutral amino acid transporter 1                   | SLC38A1  | 6  | 9,24  | 33   | 44,00   |
| (A)0hr | SEEL    | Q9H2H9     | Sodium-coupled neutral amino acid transporter 1                   | SLC38A1  | 6  | 9,24  | 27   | 36,00   |
| (A)0hr | SEEL    | Q9H2H9     | Sodium-coupled neutral amino acid transporter 1                   | SLC38A1  | 5  | 7,39  | 22   | 29,33   |
| (A)0hr | SEEL    | Q96QD8     | Sodium-coupled neutral amino acid transporter 2                   | SLC38A2  | 3  | 9,49  | 12   | 16,00   |
| (A)0hr | SEEL    | Q96QD8     | Sodium-coupled neutral amino acid transporter 2                   | SLC38A2  | 5  | 14,03 | 22   | 29,33   |
| (A)0hr | SEEL    | Q96QD8     | Sodium-coupled neutral amino acid transporter 2                   | SLC38A2  | 5  | 14,03 | 25   | 33,33   |
| (A)0hr | SEEL    | Q96QD8     | Sodium-coupled neutral amino acid transporter 2                   | SLC38A2  | 4  | 10,87 | 14   | 18,67   |
| (A)0hr | SEEL    | Q9ULF5     | Zinc transporter ZIP10                                            | SLC39A10 | 7  | 7,46  | 30   | 40,00   |
| (A)0hr | SEEL    | Q9ULF5     | Zinc transporter ZIP10                                            | SLC39A10 | 5  | 5,78  | 18   | 24,00   |
| (A)0hr | SEEL    | Q9ULF5     | Zinc transporter ZIP10                                            | SLC39A10 | 9  | 12,64 | 72   | 96,00   |
| (A)0hr | SEEL    | Q15043     | Zinc transporter ZIP14                                            | SLC39A14 | 4  | 10,98 | 47   | 62,67   |
| (A)0hr | SEEL    | Q15043     | Zinc transporter ZIP14                                            | SLC39A14 | 5  | 11,18 | 53   | 70,67   |
| (A)0hr | SEEL    | Q15043     | Zinc transporter ZIP14                                            | SLC39A14 | 4  | 10,98 | 30   | 40,00   |
| (A)0hr | SEEL    | Q15043     | Zinc transporter ZIP14                                            | SLC39A14 | 3  | 9,15  | 21   | 28,00   |
| (A)0hr | SEEL    | Q13433     | Zinc transporter ZIP6                                             | SLC39A6  | 5  | 7,02  | 18   | 24,00   |
| (A)0hr | SEEL    | Q13433     | Zinc transporter ZIP6                                             | SLC39A6  | 3  | 5,83  | 14   | 18,67   |
| (A)0hr | SEEL    | Q13433     | Zinc transporter ZIP6                                             | SLC39A6  | 5  | 5,83  | 32   | 42,67   |
| (A)0hr | SEEL    | F5GZ56     | 4F2 cell-surface antigen heavy chain                              | SLC3A2   | 36 | 51,09 | 1429 | 1905,33 |
| (A)0hr | Control | P08195     | 4F2 cell-surface antigen heavy chain                              | SLC3A2   | 4  | 7,46  | 6    | 8,00    |
| (A)0hr | Control | P08195     | 4F2 cell-surface antigen heavy chain                              | SLC3A2   | 6  | 11,11 | 14   | 18,67   |
| (A)0hr | Control | P08195     | 4F2 cell-surface antigen heavy chain                              | SLC3A2   | 16 | 24,92 | 82   | 109,33  |
| (A)0hr | Control | P08195     | 4F2 cell-surface antigen heavy chain                              | SLC3A2   | 18 | 29,52 | 58   | 77,33   |
| (A)0hr | SEEL    | P08195     | 4F2 cell-surface antigen heavy chain                              | SLC3A2   | 21 | 30,48 | 229  | 305,33  |
| (A)0hr | SEEL    | P08195     | 4F2 cell-surface antigen heavy chain                              | SLC3A2   | 23 | 33,33 | 451  | 601,33  |
| (A)0hr | SEEL    | P08195     | 4F2 cell-surface antigen heavy chain                              | SLC3A2   | 31 | 41,27 | 1307 | 1742,67 |
| (A)0hr | SEEL    | A0A024R798 | Solute carrier family 44, member 2, isoform CRA_b                 | SLC44A2  | 5  | 7,24  | 13   | 17,33   |
| (A)0hr | SEEL    | A0A024R798 | Solute carrier family 44, member 2, isoform CRA_b                 | SLC44A2  | 12 | 14,77 | 56   | 74,67   |
| (A)0hr | SEEL    | P04920     | Anion exchange protein 2                                          | SLC4A2   | 32 | 31,02 | 179  | 238,67  |
| (A)0hr | SEEL    | B5M450     | Solute carrier family 4 sodium bicarbonate cotransporter member 7 | SLC4A7   | 7  | 6,61  | 16   | 21,33   |
| (A)0hr | SEEL    | B5M450     | Solute carrier family 4 sodium bicarbonate cotransporter member 7 | SLC4A7   | 5  | 5,12  | 15   | 20,00   |

|        |         |           |                                                                                                              |          |    |       |     |        |
|--------|---------|-----------|--------------------------------------------------------------------------------------------------------------|----------|----|-------|-----|--------|
| (A)0hr | SEEL    | P31641    | Sodium- and chloride-dependent taurine transporter                                                           | SLC6A6   | 5  | 8,23  | 14  | 18,67  |
| (A)0hr | SEEL    | P31641    | Sodium- and chloride-dependent taurine transporter                                                           | SLC6A6   | 7  | 11,94 | 26  | 34,67  |
| (A)0hr | SEEL    | P48067    | Sodium- and chloride-dependent glycine transporter 1                                                         | SLC6A9   | 3  | 4,25  | 7   | 9,33   |
| (A)0hr | SEEL    | P30825    | High affinity cationic amino acid transporter 1                                                              | SLC7A1   | 2  | 2,86  | 4   | 5,33   |
| (A)0hr | SEEL    | Q9UPY5    | Cystine/glutamate transporter                                                                                | SLC7A11  | 3  | 6,99  | 13  | 17,33  |
| (A)0hr | SEEL    | Q9UPY5    | Cystine/glutamate transporter                                                                                | SLC7A11  | 4  | 8,18  | 30  | 40,00  |
| (A)0hr | SEEL    | Q9UPY5    | Cystine/glutamate transporter                                                                                | SLC7A11  | 3  | 6,79  | 13  | 17,33  |
| (A)0hr | SEEL    | Q9UPY5    | Cystine/glutamate transporter                                                                                | SLC7A11  | 3  | 5,99  | 13  | 17,33  |
| (A)0hr | Control | Q01650    | Large neutral amino acids transporter small subunit 1                                                        | SLC7A5   | 3  | 8,09  | 8   | 10,67  |
| (A)0hr | Control | Q01650    | Large neutral amino acids transporter small subunit 1                                                        | SLC7A5   | 3  | 8,09  | 7   | 9,33   |
| (A)0hr | SEEL    | Q01650    | Large neutral amino acids transporter small subunit 1                                                        | SLC7A5   | 10 | 15,38 | 226 | 301,33 |
| (A)0hr | SEEL    | Q01650    | Large neutral amino acids transporter small subunit 1                                                        | SLC7A5   | 11 | 15,78 | 251 | 334,67 |
| (A)0hr | SEEL    | Q01650    | Large neutral amino acids transporter small subunit 1                                                        | SLC7A5   | 7  | 15,38 | 151 | 201,33 |
| (A)0hr | SEEL    | Q01650    | Large neutral amino acids transporter small subunit 1                                                        | SLC7A5   | 10 | 18,34 | 184 | 245,33 |
| (A)0hr | SEEL    | Q92536    | Y+L amino acid transporter 2                                                                                 | SLC7A6   | 2  | 3,30  | 5   | 6,67   |
| (A)0hr | SEEL    | Q92536    | Y+L amino acid transporter 2                                                                                 | SLC7A6   | 3  | 9,13  | 20  | 26,67  |
| (A)0hr | SEEL    | Q92536    | Y+L amino acid transporter 2                                                                                 | SLC7A6   | 3  | 9,13  | 8   | 10,67  |
| (A)0hr | Control | P51532    | Transcription activator BRG1                                                                                 | SMARCA4  | 6  | 4,19  | 14  | 18,67  |
| (A)0hr | Control | Q14683    | Structural maintenance of chromosomes protein 1A                                                             | SMC1A    | 12 | 9,98  | 21  | 28,00  |
| (A)0hr | SEEL    | Q14683    | Structural maintenance of chromosomes protein 1A                                                             | SMC1A    | 12 | 9,98  | 23  | 30,67  |
| (A)0hr | Control | Q9UQE7    | Structural maintenance of chromosomes protein 3                                                              | SMC3     | 13 | 12,33 | 27  | 36,00  |
| (A)0hr | SEEL    | Q9UQE7    | Structural maintenance of chromosomes protein 3                                                              | SMC3     | 10 | 9,04  | 20  | 26,67  |
| (A)0hr | SEEL    | Q92485    | Acid sphingomyelinase-like phosphodiesterase 3b                                                              | SMPDL3B  | 7  | 20,00 | 56  | 74,67  |
| (A)0hr | Control | B3KU67    | cDNA FLJ39264 fis, clone OCBBF2009603, highly similar to Staphylococcal nuclease domain-containing protein 1 | SND1     | 12 | 14,56 | 32  | 42,67  |
| (A)0hr | SEEL    | Q7KZF4    | Staphylococcal nuclease domain-containing protein 1                                                          | SND1     | 2  | 2,64  | 3   | 4,00   |
| (A)0hr | Control | O75643    | U5 small nuclear ribonucleoprotein 200 kDa helicase                                                          | SNRNP200 | 33 | 15,59 | 106 | 141,33 |
| (A)0hr | SEEL    | O75643    | U5 small nuclear ribonucleoprotein 200 kDa helicase                                                          | SNRNP200 | 18 | 8,71  | 41  | 54,67  |
| (A)0hr | SEEL    | Q96PQ0    | VPS10 domain-containing receptor SorCS2                                                                      | SORCS2   | 24 | 22,78 | 77  | 102,67 |
| (A)0hr | SEEL    | Q5DT21    | Serine protease inhibitor Kazal-type 9                                                                       | SPINK9   | 2  | 50,00 | 7   | 9,33   |
| (A)0hr | SEEL    | O43278    | Kunitz-type protease inhibitor 1                                                                             | SPINT1   | 7  | 13,04 | 22  | 29,33  |
| (A)0hr | Control | Q01082    | Spectrin beta chain, non-erythrocytic 1                                                                      | SPTBN1   | 6  | 2,79  | 10  | 13,33  |
| (A)0hr | SEEL    | Q13501    | Sequestosome-1                                                                                               | SQSTM1   | 3  | 9,32  | 11  | 14,67  |
| (A)0hr | Control | AA024QZH6 | Serine arginine-rich pre-mRNA splicing factor SR-A1, isoform CRA_a                                           | SR-A1    | 3  | 3,58  | 8   | 10,67  |
| (A)0hr | Control | Q96SB4    | SRSF protein kinase 1                                                                                        | SRPK1    | 3  | 4,12  | 6   | 8,00   |
| (A)0hr | Control | Q8IYB3    | Serine/arginine repetitive matrix protein 1                                                                  | SRRM1    | 8  | 10,84 | 29  | 38,67  |
| (A)0hr | Control | Q8IYB3    | Serine/arginine repetitive matrix protein 1                                                                  | SRRM1    | 11 | 17,26 | 45  | 60,00  |
| (A)0hr | SEEL    | Q8IYB3    | Serine/arginine repetitive matrix protein 1                                                                  | SRRM1    | 10 | 17,15 | 28  | 37,33  |
| (A)0hr | SEEL    | Q8IYB3    | Serine/arginine repetitive matrix protein 1                                                                  | SRRM1    | 8  | 13,38 | 26  | 34,67  |
| (A)0hr | Control | Q9UQ35    | Serine/arginine repetitive matrix protein 2                                                                  | SRRM2    | 65 | 29,72 | 573 | 764,00 |
| (A)0hr | Control | Q9UQ35    | Serine/arginine repetitive matrix protein 2                                                                  | SRRM2    | 25 | 11,70 | 81  | 108,00 |
| (A)0hr | Control | Q9UQ35    | Serine/arginine repetitive matrix protein 2                                                                  | SRRM2    | 8  | 3,52  | 22  | 29,33  |
| (A)0hr | SEEL    | Q9UQ35    | Serine/arginine repetitive matrix protein 2                                                                  | SRRM2    | 51 | 22,49 | 257 | 342,67 |
| (A)0hr | SEEL    | Q9UQ35    | Serine/arginine repetitive matrix protein 2                                                                  | SRRM2    | 3  | 1,85  | 6   | 8,00   |
| (A)0hr | SEEL    | Q05519    | Serine/arginine-rich splicing factor 11                                                                      | SRSF11   | 2  | 8,68  | 4   | 5,33   |
| (A)0hr | SEEL    | Q658P3    | Metalloreductase STEAP3                                                                                      | STEAP3   | 2  | 4,71  | 4   | 5,33   |
| (A)0hr | SEEL    | Q687X5    | Metalloreductase STEAP4                                                                                      | STEAP4   | 5  | 16,99 | 10  | 13,33  |
| (A)0hr | SEEL    | Q687X5    | Metalloreductase STEAP4                                                                                      | STEAP4   | 11 | 32,03 | 53  | 70,67  |
| (A)0hr | SEEL    | Q687X5    | Metalloreductase STEAP4                                                                                      | STEAP4   | 9  | 28,54 | 40  | 53,33  |
| (A)0hr | SEEL    | Q687X5    | Metalloreductase STEAP4                                                                                      | STEAP4   | 8  | 23,53 | 38  | 50,67  |
| (A)0hr | SEEL    | P27105    | Erythrocyte band 7 integral membrane protein                                                                 | STOM     | 6  | 26,74 | 22  | 29,33  |
| (A)0hr | SEEL    | P27105    | Erythrocyte band 7 integral membrane protein                                                                 | STOM     | 5  | 21,53 | 19  | 25,33  |
| (A)0hr | SEEL    | P27105    | Erythrocyte band 7 integral membrane protein                                                                 | STOM     | 3  | 12,50 | 10  | 13,33  |
| (A)0hr | SEEL    | P27105    | Erythrocyte band 7 integral membrane protein                                                                 | STOM     | 6  | 24,31 | 19  | 25,33  |
| (A)0hr | SEEL    | Q9BX79    | Stimulated by retinoic acid gene 6 protein homolog                                                           | STRA6    | 3  | 5,25  | 8   | 10,67  |
| (A)0hr | SEEL    | Q9BX79    | Stimulated by retinoic acid gene 6 protein homolog                                                           | STRA6    | 5  | 7,65  | 19  | 25,33  |
| (A)0hr | SEEL    | Q9BX79    | Stimulated by retinoic acid gene 6 protein homolog                                                           | STRA6    | 3  | 5,25  | 10  | 13,33  |
| (A)0hr | Control | Q15542    | Transcription initiation factor TFIID subunit 5                                                              | TAF5     | 2  | 2,88  | 3   | 4,00   |
| (A)0hr | Control | P49848    | Transcription initiation factor TFIID subunit 6                                                              | TAF6     | 5  | 7,24  | 10  | 13,33  |
| (A)0hr | Control | Q969Z0    | Protein TBRG4                                                                                                | TBRG4    | 7  | 11,89 | 18  | 24,00  |
| (A)0hr | Control | Q13428    | Treacle protein                                                                                              | TCOF1    | 2  | 1,41  | 5   | 6,67   |
| (A)0hr | SEEL    | Q13428    | Treacle protein                                                                                              | TCOF1    | 8  | 5,71  | 19  | 25,33  |
| (A)0hr | Control | P17987    | T-complex protein 1 subunit alpha                                                                            | TCP1     | 21 | 43,53 | 97  | 129,33 |
| (A)0hr | SEEL    | P17987    | T-complex protein 1 subunit alpha                                                                            | TCP1     | 15 | 30,40 | 74  | 98,67  |
| (A)0hr | SEEL    | Q9P273    | Teneurin-3                                                                                                   | TENM3    | 31 | 12,82 | 108 | 144,00 |
| (A)0hr | SEEL    | Q9P273    | Teneurin-3                                                                                                   | TENM3    | 46 | 22,19 | 251 | 334,67 |
| (A)0hr | SEEL    | Q9P273    | Teneurin-3                                                                                                   | TENM3    | 8  | 3,48  | 20  | 26,67  |

|        |         |        |                                                                  |          |    |       |      |         |
|--------|---------|--------|------------------------------------------------------------------|----------|----|-------|------|---------|
| (A)0hr | SEEL    | Q6N022 | Teneurin-4                                                       | TENM4    | 2  | 1,84  | 10   | 13,33   |
| (A)0hr | Control | P02786 | Transferrin receptor protein 1                                   | TFRC     | 3  | 5,13  | 8    | 10,67   |
| (A)0hr | Control | P02786 | Transferrin receptor protein 1                                   | TFRC     | 5  | 7,76  | 10   | 13,33   |
| (A)0hr | SEEL    | P02786 | Transferrin receptor protein 1                                   | TFRC     | 43 | 54,21 | 823  | 1097,33 |
| (A)0hr | SEEL    | P02786 | Transferrin receptor protein 1                                   | TFRC     | 48 | 58,42 | 1632 | 2176,00 |
| (A)0hr | SEEL    | P02786 | Transferrin receptor protein 1                                   | TFRC     | 55 | 63,03 | 2220 | 2960,00 |
| (A)0hr | SEEL    | P02786 | Transferrin receptor protein 1                                   | TFRC     | 42 | 54,08 | 668  | 890,67  |
| (A)0hr | SEEL    | Q03167 | Transforming growth factor beta receptor type 3                  | TGFBR3   | 10 | 13,98 | 30   | 40,00   |
| (A)0hr | SEEL    | P07996 | Thrombospondin-1                                                 | THBS1    | 11 | 12,65 | 25   | 33,33   |
| (A)0hr | SEEL    | P07996 | Thrombospondin-1                                                 | THBS1    | 17 | 16,67 | 75   | 100,00  |
| (A)0hr | Control | Q96FV9 | THO complex subunit 1                                            | THOC1    | 6  | 9,74  | 12   | 16,00   |
| (A)0hr | Control | Q8NI27 | THO complex subunit 2                                            | THOC2    | 13 | 8,79  | 41   | 54,67   |
| (A)0hr | SEEL    | Q8NI27 | THO complex subunit 2                                            | THOC2    | 5  | 3,77  | 7    | 9,33    |
| (A)0hr | SEEL    | Q24JP5 | Transmembrane protein 132A                                       | TMEM132A | 12 | 17,01 | 64   | 85,33   |
| (A)0hr | SEEL    | Q24JP5 | Transmembrane protein 132A                                       | TMEM132A | 6  | 9,09  | 11   | 14,67   |
| (A)0hr | Control | Q9HC07 | Transmembrane protein 165                                        | TMEM165  | 2  | 11,11 | 4    | 5,33    |
| (A)0hr | SEEL    | Q9UHN6 | Transmembrane protein 2                                          | TMEM2    | 12 | 9,62  | 37   | 49,33   |
| (A)0hr | SEEL    | Q9UHN6 | Transmembrane protein 2                                          | TMEM2    | 58 | 44,25 | 520  | 693,33  |
| (A)0hr | SEEL    | Q9UHN6 | Transmembrane protein 2                                          | TMEM2    | 28 | 20,82 | 100  | 133,33  |
| (A)0hr | SEEL    | Q9UHN6 | Transmembrane protein 2                                          | TMEM2    | 6  | 5,13  | 17   | 22,67   |
| (A)0hr | SEEL    | Q9NV96 | Cell cycle control protein 50A                                   | TMEM30A  | 4  | 9,70  | 9    | 12,00   |
| (A)0hr | SEEL    | P41273 | Tumor necrosis factor ligand superfamily member 9                | TNFSF9   | 4  | 18,90 | 9    | 12,00   |
| (A)0hr | Control | Q96GM8 | Target of EGR1 protein 1                                         | TOE1     | 5  | 12,55 | 14   | 18,67   |
| (A)0hr | SEEL    | O94826 | Mitochondrial import receptor subunit TOM70                      | TOMM70A  | 2  | 4,44  | 3    | 4,00    |
| (A)0hr | Control | P11387 | DNA topoisomerase 1                                              | TOP1     | 5  | 7,19  | 11   | 14,67   |
| (A)0hr | Control | P11387 | DNA topoisomerase 1                                              | TOP1     | 10 | 13,20 | 37   | 49,33   |
| (A)0hr | Control | P11387 | DNA topoisomerase 1                                              | TOP1     | 26 | 30,72 | 233  | 310,67  |
| (A)0hr | SEEL    | P11387 | DNA topoisomerase 1                                              | TOP1     | 23 | 30,07 | 131  | 174,67  |
| (A)0hr | SEEL    | Q969P6 | DNA topoisomerase I, mitochondrial                               | TOP1MT   | 2  | 2,50  | 4    | 5,33    |
| (A)0hr | SEEL    | Q13641 | Trophoblast glycoprotein                                         | TPBG     | 7  | 19,52 | 32   | 42,67   |
| (A)0hr | Control | Q12931 | Heat shock protein 75 kDa, mitochondrial                         | TRAP1    | 17 | 23,58 | 58   | 77,33   |
| (A)0hr | SEEL    | Q12931 | Heat shock protein 75 kDa, mitochondrial                         | TRAP1    | 24 | 31,68 | 102  | 136,00  |
| (A)0hr | SEEL    | Q96QT4 | Transient receptor potential cation channel subfamily M member 7 | TRPM7    | 5  | 2,68  | 9    | 12,00   |
| (A)0hr | SEEL    | D3DPG0 | Titin, isoform CRA_a                                             | TTN      | 11 | 0,50  | 25   | 33,33   |
| (A)0hr | SEEL    | D3DPG0 | Titin, isoform CRA_a                                             | TTN      | 12 | 0,56  | 35   | 46,67   |
| (A)0hr | Control | Q8WZ42 | Titin                                                            | TTN      | 7  | 0,31  | 21   | 28,00   |
| (A)0hr | Control | Q8WZ42 | Titin                                                            | TTN      | 10 | 0,40  | 32   | 42,67   |
| (A)0hr | Control | Q8WZ42 | Titin                                                            | TTN      | 15 | 0,61  | 30   | 40,00   |
| (A)0hr | SEEL    | Q8WZ42 | Titin                                                            | TTN      | 8  | 0,36  | 14   | 18,67   |
| (A)0hr | SEEL    | Q8WZ42 | Titin                                                            | TTN      | 7  | 0,26  | 27   | 36,00   |
| (A)0hr | SEEL    | Q9C0H2 | Protein tweety homolog 3                                         | TTYH3    | 2  | 3,06  | 4    | 5,33    |
| (A)0hr | SEEL    | P68363 | Tubulin alpha-1B chain                                           | TUBA1B   | 4  | 12,42 | 13   | 17,33   |
| (A)0hr | SEEL    | Q06418 | Tyrosine-protein kinase receptor TYRO3                           | TYRO3    | 12 | 21,12 | 36   | 48,00   |
| (A)0hr | Control | P26368 | Splicing factor U2AF 65 kDa subunit                              | U2AF2    | 2  | 5,68  | 7    | 9,33    |
| (A)0hr | SEEL    | P26368 | Splicing factor U2AF 65 kDa subunit                              | U2AF2    | 5  | 12,84 | 19   | 25,33   |
| (A)0hr | Control | P0CG47 | Polyubiquitin-B                                                  | UBB      | 3  | 16,59 | 13   | 17,33   |
| (A)0hr | Control | P0CG47 | Polyubiquitin-B                                                  | UBB      | 4  | 20,52 | 23   | 30,67   |
| (A)0hr | Control | P0CG47 | Polyubiquitin-B                                                  | UBB      | 4  | 20,52 | 14   | 18,67   |
| (A)0hr | SEEL    | P0CG47 | Polyubiquitin-B                                                  | UBB      | 6  | 23,14 | 201  | 268,00  |
| (A)0hr | SEEL    | P0CG47 | Polyubiquitin-B                                                  | UBB      | 6  | 23,14 | 275  | 366,67  |
| (A)0hr | SEEL    | P0CG47 | Polyubiquitin-B                                                  | UBB      | 7  | 25,76 | 224  | 298,67  |
| (A)0hr | SEEL    | P0CG47 | Polyubiquitin-B                                                  | UBB      | 7  | 25,76 | 175  | 233,33  |
| (A)0hr | SEEL    | Q9NYU2 | UDP-glucose:glycoprotein glucosyltransferase 1                   | UGGT1    | 5  | 3,41  | 7    | 9,33    |
| (A)0hr | Control | Q92900 | Regulator of nonsense transcripts 1                              | UPF1     | 9  | 9,83  | 20   | 26,67   |
| (A)0hr | SEEL    | O75691 | Small subunit processome component 20 homolog                    | UTP20    | 9  | 3,20  | 18   | 24,00   |
| (A)0hr | Control | Q8TAA9 | Vang-like protein 1                                              | VANGL1   | 16 | 34,73 | 117  | 156,00  |
| (A)0hr | SEEL    | Q8TAA9 | Vang-like protein 1                                              | VANGL1   | 10 | 21,18 | 57   | 76,00   |
| (A)0hr | SEEL    | Q6EMK4 | Vasorin                                                          | VASN     | 12 | 21,55 | 112  | 149,33  |
| (A)0hr | Control | P08670 | Vimentin                                                         | VIM      | 28 | 58,37 | 140  | 186,67  |
| (A)0hr | SEEL    | P08670 | Vimentin                                                         | VIM      | 21 | 43,35 | 137  | 182,67  |
| (A)0hr | SEEL    | P04004 | Vitronectin                                                      | VTN      | 4  | 6,90  | 25   | 33,33   |
| (A)0hr | SEEL    | O00308 | NEDD4-like E3 ubiquitin-protein ligase WWP2                      | WWP2     | 2  | 2,87  | 4    | 5,33    |
| (A)0hr | SEEL    | O14980 | Exportin-1                                                       | XPO1     | 2  | 3,17  | 2    | 2,67    |
| (A)0hr | SEEL    | Q9UBH6 | Xenotropic and polytropic retrovirus receptor 1                  | XPR1     | 9  | 13,51 | 22   | 29,33   |
| (A)0hr | Control | P13010 | X-ray repair cross-complementing protein 5                       | XRCC5    | 3  | 3,42  | 5    | 6,67    |
| (A)0hr | SEEL    | P12956 | X-ray repair cross-complementing protein 6                       | XRCC6    | 2  | 4,60  | 3    | 4,00    |

|         |         |        |                                                                |          |    |       |     |        |
|---------|---------|--------|----------------------------------------------------------------|----------|----|-------|-----|--------|
| (B)16hr | Control | O75027 | ATP-binding cassette sub-family B member 7, mitochondrial      | ABCB7    | 6  | 7,58  | 13  | 13,00  |
| (B)16hr | SEEL    | P33527 | Multidrug resistance-associated protein 1                      | ABCC1    | 18 | 11,82 | 60  | 60,00  |
| (B)16hr | SEEL    | P33527 | Multidrug resistance-associated protein 1                      | ABCC1    | 52 | 41,21 | 270 | 270,00 |
| (B)16hr | SEEL    | O15439 | Multidrug resistance-associated protein 4                      | ABCC4    | 11 | 8,38  | 25  | 25,00  |
| (B)16hr | SEEL    | O15439 | Multidrug resistance-associated protein 4                      | ABCC4    | 39 | 30,79 | 180 | 180,00 |
| (B)16hr | SEEL    | O15440 | Multidrug resistance-associated protein 5                      | ABCC5    | 8  | 5,64  | 22  | 22,00  |
| (B)16hr | Control | P61221 | ATP-binding cassette sub-family E member 1                     | ABCE1    | 6  | 11,35 | 17  | 17,00  |
| (B)16hr | SEEL    | P61221 | ATP-binding cassette sub-family E member 1                     | ABCE1    | 13 | 20,70 | 44  | 44,00  |
| (B)16hr | Control | Q8NE71 | ATP-binding cassette sub-family F member 1                     | ABCF1    | 15 | 19,41 | 60  | 60,00  |
| (B)16hr | SEEL    | Q8NE71 | ATP-binding cassette sub-family F member 1                     | ABCF1    | 4  | 7,10  | 10  | 10,00  |
| (B)16hr | Control | Q9UG63 | ATP-binding cassette sub-family F member 2                     | ABCF2    | 4  | 6,74  | 10  | 10,00  |
| (B)16hr | SEEL    | Q9UG63 | ATP-binding cassette sub-family F member 2                     | ABCF2    | 4  | 6,74  | 12  | 12,00  |
| (B)16hr | SEEL    | Q9NUQ8 | ATP-binding cassette sub-family F member 3                     | ABCF3    | 4  | 5,64  | 7   | 7,00   |
| (B)16hr | Control | Q13085 | Acetyl-CoA carboxylase 1                                       | ACACA    | 37 | 17,48 | 269 | 269,00 |
| (B)16hr | Control | Q13085 | Acetyl-CoA carboxylase 1                                       | ACACA    | 48 | 19,27 | 592 | 592,00 |
| (B)16hr | Control | Q13085 | Acetyl-CoA carboxylase 1                                       | ACACA    | 47 | 23,44 | 161 | 161,00 |
| (B)16hr | Control | Q13085 | Acetyl-CoA carboxylase 1                                       | ACACA    | 10 | 4,82  | 16  | 16,00  |
| (B)16hr | SEEL    | Q13085 | Acetyl-CoA carboxylase 1                                       | ACACA    | 37 | 16,62 | 283 | 283,00 |
| (B)16hr | SEEL    | Q13085 | Acetyl-CoA carboxylase 1                                       | ACACA    | 46 | 21,06 | 430 | 430,00 |
| (B)16hr | SEEL    | Q13085 | Acetyl-CoA carboxylase 1                                       | ACACA    | 29 | 15,13 | 68  | 68,00  |
| (B)16hr | SEEL    | Q13085 | Acetyl-CoA carboxylase 1                                       | ACACA    | 3  | 2,05  | 5   | 5,00   |
| (B)16hr | Control | O00763 | Acetyl-CoA carboxylase 2                                       | ACACB    | 6  | 2,32  | 10  | 10,00  |
| (B)16hr | SEEL    | O00763 | Acetyl-CoA carboxylase 2                                       | ACACB    | 2  | 1,02  | 4   | 4,00   |
| (B)16hr | Control | O95573 | Long-chain-fatty-acid--CoA ligase 3                            | ACSL3    | 2  | 3,06  | 5   | 5,00   |
| (B)16hr | SEEL    | O60488 | Long-chain-fatty-acid--CoA ligase 4                            | ACSL4    | 6  | 9,28  | 11  | 11,00  |
| (B)16hr | Control | P60709 | Actin, cytoplasmic 1                                           | ACTB     | 3  | 10,40 | 10  | 10,00  |
| (B)16hr | Control | P60709 | Actin, cytoplasmic 1                                           | ACTB     | 7  | 24,53 | 19  | 19,00  |
| (B)16hr | Control | P60709 | Actin, cytoplasmic 1                                           | ACTB     | 5  | 16,53 | 18  | 18,00  |
| (B)16hr | SEEL    | P60709 | Actin, cytoplasmic 1                                           | ACTB     | 5  | 16,53 | 16  | 16,00  |
| (B)16hr | SEEL    | P60709 | Actin, cytoplasmic 1                                           | ACTB     | 6  | 18,40 | 24  | 24,00  |
| (B)16hr | SEEL    | P60709 | Actin, cytoplasmic 1                                           | ACTB     | 6  | 20,80 | 27  | 27,00  |
| (B)16hr | SEEL    | P60709 | Actin, cytoplasmic 1                                           | ACTB     | 6  | 17,33 | 32  | 32,00  |
| (B)16hr | Control | P12814 | Alpha-actinin-1                                                | ACTN1    | 4  | 4,60  | 8   | 8,00   |
| (B)16hr | SEEL    | P12814 | Alpha-actinin-1                                                | ACTN1    | 2  | 2,58  | 4   | 4,00   |
| (B)16hr | Control | O43707 | Alpha-actinin-4                                                | ACTN4    | 8  | 8,89  | 20  | 20,00  |
| (B)16hr | SEEL    | Q13444 | Disintegrin and metalloproteinase domain-containing protein 15 | ADAM15   | 7  | 9,39  | 21  | 21,00  |
| (B)16hr | SEEL    | Q13444 | Disintegrin and metalloproteinase domain-containing protein 15 | ADAM15   | 4  | 5,21  | 9   | 9,00   |
| (B)16hr | SEEL    | P78536 | Disintegrin and metalloproteinase domain-containing protein 17 | ADAM17   | 5  | 4,98  | 13  | 13,00  |
| (B)16hr | SEEL    | P78536 | Disintegrin and metalloproteinase domain-containing protein 17 | ADAM17   | 3  | 3,16  | 5   | 5,00   |
| (B)16hr | SEEL    | P55265 | Double-stranded RNA-specific adenosine deaminase               | ADAR     | 4  | 3,34  | 6   | 6,00   |
| (B)16hr | SEEL    | O60266 | Adenylate cyclase type 3                                       | ADCY3    | 6  | 6,91  | 13  | 13,00  |
| (B)16hr | SEEL    | O60503 | Adenylate cyclase type 9                                       | ADCY9    | 8  | 6,95  | 20  | 20,00  |
| (B)16hr | SEEL    | O00468 | Agtrin                                                         | AGRN     | 5  | 3,00  | 12  | 12,00  |
| (B)16hr | Control | Q09666 | Neuroblast differentiation-associated protein AHNAK            | AHNAK    | 38 | 8,13  | 107 | 107,00 |
| (B)16hr | SEEL    | Q09666 | Neuroblast differentiation-associated protein AHNAK            | AHNAK    | 81 | 16,79 | 248 | 248,00 |
| (B)16hr | SEEL    | Q09666 | Neuroblast differentiation-associated protein AHNAK            | AHNAK    | 5  | 1,14  | 34  | 34,00  |
| (B)16hr | SEEL    | Q8IVF2 | Protein AHNAK2                                                 | AHNAK2   | 3  | 1,09  | 12  | 12,00  |
| (B)16hr | SEEL    | P02765 | Alpha-2-HS-glycoprotein                                        | AHSG     | 3  | 5,18  | 7   | 7,00   |
| (B)16hr | Control | O95831 | Apoptosis-inducing factor 1, mitochondrial                     | AIFM1    | 3  | 5,71  | 4   | 4,00   |
| (B)16hr | SEEL    | O95831 | Apoptosis-inducing factor 1, mitochondrial                     | AIFM1    | 4  | 7,01  | 10  | 10,00  |
| (B)16hr | Control | Q02040 | A-kinase anchor protein 17A                                    | AKAP17A  | 15 | 18,27 | 74  | 74,00  |
| (B)16hr | SEEL    | Q02040 | A-kinase anchor protein 17A                                    | AKAP17A  | 9  | 11,80 | 19  | 19,00  |
| (B)16hr | SEEL    | Q13740 | CD166 antigen                                                  | ALCAM    | 5  | 8,92  | 15  | 15,00  |
| (B)16hr | SEEL    | Q13740 | CD166 antigen                                                  | ALCAM    | 29 | 53,86 | 360 | 360,00 |
| (B)16hr | SEEL    | Q13740 | CD166 antigen                                                  | ALCAM    | 2  | 4,12  | 5   | 5,00   |
| (B)16hr | Control | P54886 | Delta-1-pyrroline-5-carboxylate synthase                       | ALDH18A1 | 14 | 19,37 | 82  | 82,00  |
| (B)16hr | Control | P54886 | Delta-1-pyrroline-5-carboxylate synthase                       | ALDH18A1 | 7  | 9,69  | 19  | 19,00  |
| (B)16hr | SEEL    | P54886 | Delta-1-pyrroline-5-carboxylate synthase                       | ALDH18A1 | 11 | 15,22 | 33  | 33,00  |
| (B)16hr | SEEL    | P54886 | Delta-1-pyrroline-5-carboxylate synthase                       | ALDH18A1 | 10 | 12,70 | 22  | 22,00  |
| (B)16hr | Control | P09923 | Intestinal-type alkaline phosphatase                           | ALPI     | 7  | 12,50 | 19  | 19,00  |
| (B)16hr | SEEL    | P09923 | Intestinal-type alkaline phosphatase                           | ALPI     | 11 | 22,16 | 58  | 58,00  |
| (B)16hr | SEEL    | P09923 | Intestinal-type alkaline phosphatase                           | ALPI     | 8  | 15,72 | 29  | 29,00  |
| (B)16hr | SEEL    | P09923 | Intestinal-type alkaline phosphatase                           | ALPI     | 19 | 45,08 | 291 | 291,00 |
| (B)16hr | Control | P05187 | Alkaline phosphatase, placental type                           | ALPP     | 7  | 18,88 | 31  | 31,00  |
| (B)16hr | SEEL    | P05187 | Alkaline phosphatase, placental type                           | ALPP     | 5  | 14,39 | 14  | 14,00  |
| (B)16hr | SEEL    | P05187 | Alkaline phosphatase, placental type                           | ALPP     | 3  | 9,35  | 3   | 3,00   |

|         |         |            |                                                                                                                         |          |    |       |     |        |
|---------|---------|------------|-------------------------------------------------------------------------------------------------------------------------|----------|----|-------|-----|--------|
| (B)16hr | SEEL    | P05187     | Alkaline phosphatase, placental type                                                                                    | ALPP     | 2  | 2,06  | 32  | 32,00  |
| (B)16hr | SEEL    | Q4KMQ2     | Anoctamin-6                                                                                                             | ANO6     | 3  | 3,41  | 4   | 4,00   |
| (B)16hr | SEEL    | Q4KMQ2     | Anoctamin-6                                                                                                             | ANO6     | 12 | 15,16 | 23  | 23,00  |
| (B)16hr | SEEL    | Q4KMQ2     | Anoctamin-6                                                                                                             | ANO6     | 18 | 21,10 | 53  | 53,00  |
| (B)16hr | SEEL    | P15144     | Aminopeptidase N                                                                                                        | ANPEP    | 6  | 4,96  | 18  | 18,00  |
| (B)16hr | SEEL    | B5ME49     | AP-1 complex subunit mu-1                                                                                               | AP1M1    | 2  | 0,18  | 12  | 12,00  |
| (B)16hr | SEEL    | P63010     | AP-2 complex subunit beta                                                                                               | AP2B1    | 3  | 3,42  | 5   | 5,00   |
| (B)16hr | Control | O14617     | AP-3 complex subunit delta-1                                                                                            | AP3D1    | 3  | 2,86  | 5   | 5,00   |
| (B)16hr | Control | O14617     | AP-3 complex subunit delta-1                                                                                            | AP3D1    | 16 | 16,31 | 54  | 54,00  |
| (B)16hr | SEEL    | O14617     | AP-3 complex subunit delta-1                                                                                            | AP3D1    | 2  | 2,08  | 4   | 4,00   |
| (B)16hr | SEEL    | O14617     | AP-3 complex subunit delta-1                                                                                            | AP3D1    | 11 | 11,45 | 28  | 28,00  |
| (B)16hr | Control | P48444     | Coatomer subunit delta                                                                                                  | ARCN1    | 4  | 7,83  | 11  | 11,00  |
| (B)16hr | Control | A0A024RDY9 | Rho guanine nucleotide exchange factor (GEF) 7, isoform CRA_b                                                           | ARHGEF7  | 9  | 13,62 | 21  | 21,00  |
| (B)16hr | Control | A0A024RDY9 | Rho guanine nucleotide exchange factor (GEF) 7, isoform CRA_b                                                           | ARHGEF7  | 6  | 10,06 | 30  | 30,00  |
| (B)16hr | Control | A0A024RDY9 | Rho guanine nucleotide exchange factor (GEF) 7, isoform CRA_b                                                           | ARHGEF7  | 33 | 54,02 | 299 | 299,00 |
| (B)16hr | SEEL    | A0A024RDY9 | Rho guanine nucleotide exchange factor (GEF) 7, isoform CRA_b                                                           | ARHGEF7  | 11 | 17,80 | 37  | 37,00  |
| (B)16hr | Control | P08243     | Asparagine synthetase [glutamine-hydrolyzing]                                                                           | ASNS     | 3  | 6,06  | 5   | 5,00   |
| (B)16hr | SEEL    | Q9NVI7     | ATPase family AAA domain-containing protein 3A                                                                          | ATAD3A   | 10 | 14,35 | 26  | 26,00  |
| (B)16hr | Control | P05023     | Sodium/potassium-transporting ATPase subunit alpha-1                                                                    | ATP1A1   | 10 | 10,07 | 30  | 30,00  |
| (B)16hr | Control | P05023     | Sodium/potassium-transporting ATPase subunit alpha-1                                                                    | ATP1A1   | 13 | 11,53 | 33  | 33,00  |
| (B)16hr | SEEL    | P05023     | Sodium/potassium-transporting ATPase subunit alpha-1                                                                    | ATP1A1   | 32 | 30,40 | 263 | 263,00 |
| (B)16hr | SEEL    | P05023     | Sodium/potassium-transporting ATPase subunit alpha-1                                                                    | ATP1A1   | 39 | 33,33 | 567 | 567,00 |
| (B)16hr | SEEL    | P05023     | Sodium/potassium-transporting ATPase subunit alpha-1                                                                    | ATP1A1   | 40 | 33,43 | 806 | 806,00 |
| (B)16hr | SEEL    | P05023     | Sodium/potassium-transporting ATPase subunit alpha-1                                                                    | ATP1A1   | 3  | 3,91  | 9   | 9,00   |
| (B)16hr | SEEL    | B3KW93     | cDNA FLJ42590 fis, clone BRACE3009708, highly similar to Sodium/potassium-transporting ATPase alpha-2chain (EC 3.6.3.9) | ATP1A2   | 2  | 2,17  | 11  | 11,00  |
| (B)16hr | SEEL    | B3KW93     | cDNA FLJ42590 fis, clone BRACE3009708, highly similar to Sodium/potassium-transporting ATPase alpha-2chain (EC 3.6.3.9) | ATP1A2   | 2  | 2,17  | 21  | 21,00  |
| (B)16hr | SEEL    | P13637     | Sodium/potassium-transporting ATPase subunit alpha-3                                                                    | ATP1A3   | 2  | 1,97  | 24  | 24,00  |
| (B)16hr | SEEL    | Q13733     | Sodium/potassium-transporting ATPase subunit alpha-4                                                                    | ATP1A4   | 3  | 2,53  | 8   | 8,00   |
| (B)16hr | SEEL    | P05026     | Sodium/potassium-transporting ATPase subunit beta-1                                                                     | ATP1B1   | 7  | 22,77 | 62  | 62,00  |
| (B)16hr | SEEL    | P05026     | Sodium/potassium-transporting ATPase subunit beta-1                                                                     | ATP1B1   | 7  | 22,77 | 26  | 26,00  |
| (B)16hr | SEEL    | P54709     | Sodium/potassium-transporting ATPase subunit beta-3                                                                     | ATP1B3   | 2  | 8,96  | 3   | 3,00   |
| (B)16hr | SEEL    | P54709     | Sodium/potassium-transporting ATPase subunit beta-3                                                                     | ATP1B3   | 2  | 8,96  | 7   | 7,00   |
| (B)16hr | SEEL    | P54709     | Sodium/potassium-transporting ATPase subunit beta-3                                                                     | ATP1B3   | 5  | 21,86 | 48  | 48,00  |
| (B)16hr | Control | P16615     | Sarcoplasmic/endoplasmic reticulum calcium ATPase 2                                                                     | ATP2A2   | 3  | 3,36  | 7   | 7,00   |
| (B)16hr | Control | P16615     | Sarcoplasmic/endoplasmic reticulum calcium ATPase 2                                                                     | ATP2A2   | 22 | 21,59 | 102 | 102,00 |
| (B)16hr | SEEL    | P16615     | Sarcoplasmic/endoplasmic reticulum calcium ATPase 2                                                                     | ATP2A2   | 8  | 8,93  | 23  | 23,00  |
| (B)16hr | SEEL    | P16615     | Sarcoplasmic/endoplasmic reticulum calcium ATPase 2                                                                     | ATP2A2   | 13 | 14,11 | 55  | 55,00  |
| (B)16hr | Control | P20020     | Plasma membrane calcium-transporting ATPase 1                                                                           | ATP2B1   | 5  | 5,48  | 10  | 10,00  |
| (B)16hr | SEEL    | P20020     | Plasma membrane calcium-transporting ATPase 1                                                                           | ATP2B1   | 9  | 9,22  | 23  | 23,00  |
| (B)16hr | SEEL    | P20020     | Plasma membrane calcium-transporting ATPase 1                                                                           | ATP2B1   | 10 | 9,14  | 28  | 28,00  |
| (B)16hr | SEEL    | P23634     | Plasma membrane calcium-transporting ATPase 4                                                                           | ATP2B4   | 2  | 2,42  | 2   | 2,00   |
| (B)16hr | SEEL    | O75882     | Attractin                                                                                                               | ATRN     | 7  | 5,11  | 22  | 22,00  |
| (B)16hr | SEEL    | P50895     | Basal cell adhesion molecule                                                                                            | BCAM     | 3  | 5,89  | 4   | 4,00   |
| (B)16hr | SEEL    | P50895     | Basal cell adhesion molecule                                                                                            | BCAM     | 20 | 41,56 | 129 | 129,00 |
| (B)16hr | SEEL    | P50895     | Basal cell adhesion molecule                                                                                            | BCAM     | 9  | 17,68 | 37  | 37,00  |
| (B)16hr | SEEL    | P35613     | Basigin                                                                                                                 | BSG      | 5  | 13,25 | 18  | 18,00  |
| (B)16hr | SEEL    | P35613     | Basigin                                                                                                                 | BSG      | 8  | 21,56 | 34  | 34,00  |
| (B)16hr | SEEL    | P35613     | Basigin                                                                                                                 | BSG      | 11 | 35,58 | 532 | 532,00 |
| (B)16hr | SEEL    | Q10589     | Bone marrow stromal antigen 2                                                                                           | BST2     | 2  | 13,89 | 4   | 4,00   |
| (B)16hr | SEEL    | Q7KYR7     | Butyrophilin subfamily 2 member A1                                                                                      | BTN2A1   | 13 | 23,53 | 65  | 65,00  |
| (B)16hr | Control | Q9H8G2     | Caspase activity and apoptosis inhibitor 1                                                                              | CAAP1    | 6  | 18,28 | 23  | 23,00  |
| (B)16hr | SEEL    | Q9H8G2     | Caspase activity and apoptosis inhibitor 1                                                                              | CAAP1    | 3  | 10,80 | 6   | 6,00   |
| (B)16hr | SEEL    | P54289     | Voltage-dependent calcium channel subunit alpha-2/delta-1                                                               | CACNA2D1 | 31 | 30,83 | 141 | 141,00 |
| (B)16hr | Control | P27708     | CAD protein                                                                                                             | CAD      | 5  | 2,47  | 13  | 13,00  |
| (B)16hr | SEEL    | P27708     | CAD protein                                                                                                             | CAD      | 7  | 3,28  | 13  | 13,00  |
| (B)16hr | SEEL    | Q9BY67     | Cell adhesion molecule 1                                                                                                | CADM1    | 6  | 17,42 | 29  | 29,00  |
| (B)16hr | SEEL    | Q8NFZ8     | Cell adhesion molecule 4                                                                                                | CADM4    | 4  | 13,40 | 11  | 11,00  |
| (B)16hr | SEEL    | Q86VP6     | Cullin-associated NEDD8-dissociated protein 1                                                                           | CAND1    | 4  | 3,33  | 8   | 8,00   |
| (B)16hr | SEEL    | Q03135     | Caveolin-1                                                                                                              | CAV1     | 5  | 28,65 | 28  | 28,00  |
| (B)16hr | Control | P49368     | T-complex protein 1 subunit gamma                                                                                       | CCT3     | 11 | 23,67 | 36  | 36,00  |
| (B)16hr | SEEL    | P49368     | T-complex protein 1 subunit gamma                                                                                       | CCT3     | 17 | 31,56 | 62  | 62,00  |
| (B)16hr | Control | P50991     | T-complex protein 1 subunit delta                                                                                       | CCT4     | 5  | 7,98  | 12  | 12,00  |
| (B)16hr | SEEL    | P50991     | T-complex protein 1 subunit delta                                                                                       | CCT4     | 9  | 17,25 | 22  | 22,00  |
| (B)16hr | Control | P48643     | T-complex protein 1 subunit epsilon                                                                                     | CCT5     | 5  | 7,02  | 15  | 15,00  |
| (B)16hr | SEEL    | P48643     | T-complex protein 1 subunit epsilon                                                                                     | CCT5     | 7  | 14,05 | 26  | 26,00  |

|         |         |         |                                                                         |        |    |       |     |        |
|---------|---------|---------|-------------------------------------------------------------------------|--------|----|-------|-----|--------|
| (B)16hr | Control | P40227  | T-complex protein 1 subunit zeta                                        | CCT6A  | 12 | 25,42 | 44  | 44,00  |
| (B)16hr | SEEL    | P40227  | T-complex protein 1 subunit zeta                                        | CCT6A  | 14 | 32,96 | 43  | 43,00  |
| (B)16hr | Control | P50990  | T-complex protein 1 subunit theta                                       | CCT8   | 10 | 18,80 | 28  | 28,00  |
| (B)16hr | SEEL    | P50990  | T-complex protein 1 subunit theta                                       | CCT8   | 12 | 23,54 | 32  | 32,00  |
| (B)16hr | SEEL    | Q6YHK3  | CD109 antigen                                                           | CD109  | 21 | 17,30 | 77  | 77,00  |
| (B)16hr | SEEL    | Q6YHK3  | CD109 antigen                                                           | CD109  | 6  | 5,12  | 10  | 10,00  |
| (B)16hr | SEEL    | Q6YHK3  | CD109 antigen                                                           | CD109  | 2  | 2,35  | 2   | 2,00   |
| (B)16hr | SEEL    | P48509  | CD151 antigen                                                           | CD151  | 3  | 9,09  | 11  | 11,00  |
| (B)16hr | SEEL    | P48509  | CD151 antigen                                                           | CD151  | 5  | 16,21 | 24  | 24,00  |
| (B)16hr | SEEL    | Q5ZPR3  | CD276 antigen                                                           | CD276  | 6  | 16,85 | 31  | 31,00  |
| (B)16hr | SEEL    | Q5ZPR3  | CD276 antigen                                                           | CD276  | 11 | 31,65 | 416 | 416,00 |
| (B)16hr | SEEL    | Q5ZPR3  | CD276 antigen                                                           | CD276  | 8  | 23,41 | 44  | 44,00  |
| (B)16hr | Control | P16070  | CD44 antigen                                                            | CD44   | 3  | 3,91  | 9   | 9,00   |
| (B)16hr | SEEL    | P16070  | CD44 antigen                                                            | CD44   | 7  | 10,24 | 26  | 26,00  |
| (B)16hr | SEEL    | P16070  | CD44 antigen                                                            | CD44   | 11 | 16,04 | 212 | 212,00 |
| (B)16hr | SEEL    | P16070  | CD44 antigen                                                            | CD44   | 12 | 17,52 | 333 | 333,00 |
| (B)16hr | SEEL    | P16070  | CD44 antigen                                                            | CD44   | 11 | 16,04 | 109 | 109,00 |
| (B)16hr | SEEL    | P15529  | Membrane cofactor protein                                               | CD46   | 9  | 17,09 | 89  | 89,00  |
| (B)16hr | SEEL    | R4GN18  | Membrane cofactor protein (Fragment)                                    | CD46   | 2  | 19,23 | 27  | 27,00  |
| (B)16hr | SEEL    | Q08722  | Leukocyte surface antigen CD47                                          | CD47   | 2  | 5,88  | 13  | 13,00  |
| (B)16hr | SEEL    | Q08722  | Leukocyte surface antigen CD47                                          | CD47   | 3  | 8,67  | 26  | 26,00  |
| (B)16hr | SEEL    | Q08722  | Leukocyte surface antigen CD47                                          | CD47   | 3  | 8,67  | 35  | 35,00  |
| (B)16hr | SEEL    | Q08722  | Leukocyte surface antigen CD47                                          | CD47   | 3  | 8,67  | 27  | 27,00  |
| (B)16hr | SEEL    | B1AP13  | Complement decay-accelerating factor                                    | CD55   | 5  | 10,36 | 32  | 32,00  |
| (B)16hr | Control | P08174  | Complement decay-accelerating factor                                    | CD55   | 5  | 12,34 | 16  | 16,00  |
| (B)16hr | SEEL    | P08174  | Complement decay-accelerating factor                                    | CD55   | 11 | 26,25 | 35  | 35,00  |
| (B)16hr | SEEL    | P08174  | Complement decay-accelerating factor                                    | CD55   | 17 | 42,26 | 357 | 357,00 |
| (B)16hr | SEEL    | P19256  | Lymphocyte function-associated antigen 3                                | CD58   | 3  | 8,00  | 20  | 20,00  |
| (B)16hr | SEEL    | P48960  | CD97 antigen                                                            | CD97   | 5  | 5,63  | 40  | 40,00  |
| (B)16hr | SEEL    | P48960  | CD97 antigen                                                            | CD97   | 4  | 5,51  | 32  | 32,00  |
| (B)16hr | SEEL    | P48960  | CD97 antigen                                                            | CD97   | 16 | 22,28 | 126 | 126,00 |
| (B)16hr | SEEL    | P48960  | CD97 antigen                                                            | CD97   | 15 | 21,56 | 133 | 133,00 |
| (B)16hr | Control | Q99459  | Cell division cycle 5-like protein                                      | CDC5L  | 4  | 5,11  | 7   | 7,00   |
| (B)16hr | SEEL    | P19022  | Cadherin-2                                                              | CDH2   | 8  | 15,23 | 24  | 24,00  |
| (B)16hr | SEEL    | P19022  | Cadherin-2                                                              | CDH2   | 15 | 26,82 | 86  | 86,00  |
| (B)16hr | SEEL    | P33151  | Cadherin-5                                                              | CDH5   | 15 | 19,26 | 98  | 98,00  |
| (B)16hr | Control | P21127  | Cyclin-dependent kinase 11B                                             | CDK11B | 9  | 11,45 | 15  | 15,00  |
| (B)16hr | SEEL    | Q9NYQ6  | Cadherin EGF LAG seven-pass G-type receptor 1                           | CELSR1 | 9  | 3,52  | 29  | 29,00  |
| (B)16hr | SEEL    | Q9NYQ6  | Cadherin EGF LAG seven-pass G-type receptor 1                           | CELSR1 | 4  | 1,73  | 13  | 13,00  |
| (B)16hr | Control | O76031  | ATP-dependent Clp protease ATP-binding subunit clpX-like, mitochondrial | CLPX   | 3  | 5,69  | 7   | 7,00   |
| (B)16hr | SEEL    | O76031  | ATP-dependent Clp protease ATP-binding subunit clpX-like, mitochondrial | CLPX   | 2  | 4,11  | 8   | 8,00   |
| (B)16hr | Control | Q00610  | Clathrin heavy chain 1                                                  | CLTC   | 19 | 12,66 | 54  | 54,00  |
| (B)16hr | SEEL    | Q00610  | Clathrin heavy chain 1                                                  | CLTC   | 36 | 25,43 | 111 | 111,00 |
| (B)16hr | SEEL    | Q9NRRU3 | Metal transporter CNNM1                                                 | CNNM1  | 2  | 2,63  | 8   | 8,00   |
| (B)16hr | SEEL    | Q9H8M5  | Metal transporter CNNM2                                                 | CNNM2  | 6  | 7,31  | 17  | 17,00  |
| (B)16hr | SEEL    | Q9H8M5  | Metal transporter CNNM2                                                 | CNNM2  | 14 | 16,46 | 39  | 39,00  |
| (B)16hr | SEEL    | Q9H8M5  | Metal transporter CNNM2                                                 | CNNM2  | 5  | 6,63  | 13  | 13,00  |
| (B)16hr | SEEL    | Q8NE01  | Metal transporter CNNM3                                                 | CNNM3  | 2  | 2,55  | 3   | 3,00   |
| (B)16hr | SEEL    | Q8NE01  | Metal transporter CNNM3                                                 | CNNM3  | 21 | 36,49 | 89  | 89,00  |
| (B)16hr | SEEL    | Q8NE01  | Metal transporter CNNM3                                                 | CNNM3  | 8  | 12,73 | 16  | 16,00  |
| (B)16hr | SEEL    | Q6P4Q7  | Metal transporter CNNM4                                                 | CNNM4  | 5  | 6,97  | 14  | 14,00  |
| (B)16hr | SEEL    | Q6P4Q7  | Metal transporter CNNM4                                                 | CNNM4  | 9  | 12,77 | 27  | 27,00  |
| (B)16hr | SEEL    | Q6P4Q7  | Metal transporter CNNM4                                                 | CNNM4  | 17 | 24,26 | 75  | 75,00  |
| (B)16hr | Control | P53621  | Coatomer subunit alpha                                                  | COPA   | 15 | 12,75 | 32  | 32,00  |
| (B)16hr | SEEL    | P53621  | Coatomer subunit alpha                                                  | COPA   | 15 | 13,32 | 36  | 36,00  |
| (B)16hr | Control | P53618  | Coatomer subunit beta                                                   | COPB1  | 6  | 7,97  | 25  | 25,00  |
| (B)16hr | SEEL    | P53618  | Coatomer subunit beta                                                   | COPB1  | 6  | 8,29  | 18  | 18,00  |
| (B)16hr | Control | Q9Y678  | Coatomer subunit gamma-1                                                | COPG1  | 13 | 17,28 | 31  | 31,00  |
| (B)16hr | SEEL    | Q9Y678  | Coatomer subunit gamma-1                                                | COPG1  | 10 | 12,93 | 19  | 19,00  |
| (B)16hr | Control | Q9ULV4  | Coronin-1C                                                              | CORO1C | 10 | 19,83 | 31  | 31,00  |
| (B)16hr | Control | Q99829  | Copine-1                                                                | CPNE1  | 9  | 15,46 | 28  | 28,00  |
| (B)16hr | SEEL    | Q99829  | Copine-1                                                                | CPNE1  | 7  | 12,29 | 17  | 17,00  |
| (B)16hr | SEEL    | O75131  | Copine-3                                                                | CPNE3  | 4  | 10,24 | 9   | 9,00   |
| (B)16hr | Control | P31327  | Carbamoyl-phosphate synthase [ammonia], mitochondrial                   | CPS1   | 59 | 43,80 | 478 | 478,00 |
| (B)16hr | Control | P31327  | Carbamoyl-phosphate synthase [ammonia], mitochondrial                   | CPS1   | 19 | 12,73 | 53  | 53,00  |
| (B)16hr | SEEL    | P31327  | Carbamoyl-phosphate synthase [ammonia], mitochondrial                   | CPS1   | 8  | 5,80  | 17  | 17,00  |

|         |         |        |                                                                                                            |        |    |       |     |        |
|---------|---------|--------|------------------------------------------------------------------------------------------------------------|--------|----|-------|-----|--------|
| (B)16hr | SEEL    | P31327 | Carbamoyl-phosphate synthase [ammonia], mitochondrial                                                      | CPS1   | 72 | 54,07 | 548 | 548,00 |
| (B)16hr | SEEL    | P31327 | Carbamoyl-phosphate synthase [ammonia], mitochondrial                                                      | CPS1   | 12 | 9,20  | 30  | 30,00  |
| (B)16hr | Control | P50416 | Carnitine O-palmitoyltransferase 1, liver isoform                                                          | CPT1A  | 3  | 4,40  | 5   | 5,00   |
| (B)16hr | SEEL    | P50416 | Carnitine O-palmitoyltransferase 1, liver isoform                                                          | CPT1A  | 3  | 4,14  | 6   | 6,00   |
| (B)16hr | SEEL    | P50416 | Carnitine O-palmitoyltransferase 1, liver isoform                                                          | CPT1A  | 5  | 6,99  | 11  | 11,00  |
| (B)16hr | Control | P55060 | Exportin-2                                                                                                 | CSE1L  | 9  | 10,30 | 17  | 17,00  |
| (B)16hr | SEEL    | P55060 | Exportin-2                                                                                                 | CSE1L  | 13 | 15,45 | 24  | 24,00  |
| (B)16hr | SEEL    | P15509 | Granulocyte-macrophage colony-stimulating factor receptor subunit alpha                                    | CSF2RA | 3  | 8,50  | 10  | 10,00  |
| (B)16hr | SEEL    | Q6UVK1 | Chondroitin sulfate proteoglycan 4                                                                         | CSPG4  | 54 | 28,42 | 353 | 353,00 |
| (B)16hr | SEEL    | Q6UVK1 | Chondroitin sulfate proteoglycan 4                                                                         | CSPG4  | 65 | 36,09 | 459 | 459,00 |
| (B)16hr | SEEL    | Q6UVK1 | Chondroitin sulfate proteoglycan 4                                                                         | CSPG4  | 4  | 1,77  | 6   | 6,00   |
| (B)16hr | SEEL    | P35221 | Catenin alpha-1                                                                                            | CTNNA1 | 5  | 5,63  | 10  | 10,00  |
| (B)16hr | SEEL    | P35222 | Catenin beta-1                                                                                             | CTNNB1 | 26 | 39,95 | 142 | 142,00 |
| (B)16hr | SEEL    | P35222 | Catenin beta-1                                                                                             | CTNNB1 | 5  | 6,79  | 11  | 11,00  |
| (B)16hr | Control | P17812 | CTP synthase 1                                                                                             | CTPS1  | 5  | 9,81  | 12  | 12,00  |
| (B)16hr | SEEL    | P17812 | CTP synthase 1                                                                                             | CTPS1  | 6  | 9,81  | 18  | 18,00  |
| (B)16hr | Control | Q13619 | Cullin-4A                                                                                                  | CUL4A  | 5  | 6,85  | 11  | 11,00  |
| (B)16hr | SEEL    | Q13619 | Cullin-4A                                                                                                  | CUL4A  | 2  | 3,16  | 3   | 3,00   |
| (B)16hr | SEEL    | P61073 | C-X-C chemokine receptor type 4                                                                            | CXCR4  | 3  | 11,65 | 10  | 10,00  |
| (B)16hr | SEEL    | P61073 | C-X-C chemokine receptor type 4                                                                            | CXCR4  | 4  | 13,92 | 17  | 17,00  |
| (B)16hr | SEEL    | P61073 | C-X-C chemokine receptor type 4                                                                            | CXCR4  | 3  | 8,81  | 11  | 11,00  |
| (B)16hr | SEEL    | Q14118 | Dystroglycan                                                                                               | DAG1   | 10 | 8,72  | 92  | 92,00  |
| (B)16hr | SEEL    | Q14118 | Dystroglycan                                                                                               | DAG1   | 8  | 7,71  | 66  | 66,00  |
| (B)16hr | Control | Q9UER7 | Death domain-associated protein 6                                                                          | DAXX   | 7  | 12,03 | 22  | 22,00  |
| (B)16hr | Control | P11182 | Lipoamide acyltransferase component of branched-chain alpha-keto acid dehydrogenase complex, mitochondrial | DBT    | 9  | 17,01 | 45  | 45,00  |
| (B)16hr | Control | P11182 | Lipoamide acyltransferase component of branched-chain alpha-keto acid dehydrogenase complex, mitochondrial | DBT    | 7  | 13,69 | 16  | 16,00  |
| (B)16hr | Control | Q92499 | ATP-dependent RNA helicase DDX1                                                                            | DDX1   | 9  | 12,70 | 28  | 28,00  |
| (B)16hr | SEEL    | Q92499 | ATP-dependent RNA helicase DDX1                                                                            | DDX1   | 7  | 9,32  | 20  | 20,00  |
| (B)16hr | Control | Q92841 | Probable ATP-dependent RNA helicase DDX17                                                                  | DDX17  | 8  | 12,35 | 26  | 26,00  |
| (B)16hr | SEEL    | Q92841 | Probable ATP-dependent RNA helicase DDX17                                                                  | DDX17  | 6  | 10,84 | 13  | 13,00  |
| (B)16hr | Control | Q9UHI6 | Probable ATP-dependent RNA helicase DDX20                                                                  | DDX20  | 6  | 7,89  | 19  | 19,00  |
| (B)16hr | Control | Q9UHI6 | Probable ATP-dependent RNA helicase DDX20                                                                  | DDX20  | 24 | 34,95 | 141 | 141,00 |
| (B)16hr | SEEL    | Q9UHI6 | Probable ATP-dependent RNA helicase DDX20                                                                  | DDX20  | 5  | 6,31  | 14  | 14,00  |
| (B)16hr | SEEL    | Q9UHI6 | Probable ATP-dependent RNA helicase DDX20                                                                  | DDX20  | 14 | 21,36 | 50  | 50,00  |
| (B)16hr | Control | Q9NR30 | Nucleolar RNA helicase 2                                                                                   | DDX21  | 23 | 29,76 | 81  | 81,00  |
| (B)16hr | SEEL    | Q9NR30 | Nucleolar RNA helicase 2                                                                                   | DDX21  | 12 | 16,48 | 28  | 28,00  |
| (B)16hr | Control | Q9BUQ8 | Probable ATP-dependent RNA helicase DDX23                                                                  | DDX23  | 14 | 18,05 | 43  | 43,00  |
| (B)16hr | SEEL    | Q9BUQ8 | Probable ATP-dependent RNA helicase DDX23                                                                  | DDX23  | 6  | 7,32  | 11  | 11,00  |
| (B)16hr | Control | Q9GZR7 | ATP-dependent RNA helicase DDX24                                                                           | DDX24  | 13 | 17,69 | 40  | 40,00  |
| (B)16hr | SEEL    | Q9GZR7 | ATP-dependent RNA helicase DDX24                                                                           | DDX24  | 10 | 12,57 | 25  | 25,00  |
| (B)16hr | Control | O00571 | ATP-dependent RNA helicase DDX3X                                                                           | DDX3X  | 21 | 34,74 | 121 | 121,00 |
| (B)16hr | SEEL    | O00571 | ATP-dependent RNA helicase DDX3X                                                                           | DDX3X  | 2  | 3,93  | 3   | 3,00   |
| (B)16hr | SEEL    | O00571 | ATP-dependent RNA helicase DDX3X                                                                           | DDX3X  | 22 | 35,20 | 137 | 137,00 |
| (B)16hr | Control | P17844 | Probable ATP-dependent RNA helicase DDX5                                                                   | DDX5   | 20 | 27,36 | 91  | 91,00  |
| (B)16hr | SEEL    | P17844 | Probable ATP-dependent RNA helicase DDX5                                                                   | DDX5   | 17 | 28,01 | 73  | 73,00  |
| (B)16hr | SEEL    | Q9Y2R4 | Probable ATP-dependent RNA helicase DDX52                                                                  | DDX52  | 2  | 5,34  | 3   | 3,00   |
| (B)16hr | Control | O43143 | Putative pre-mRNA-splicing factor ATP-dependent RNA helicase DHX15                                         | DHX15  | 10 | 13,33 | 35  | 35,00  |
| (B)16hr | SEEL    | O43143 | Putative pre-mRNA-splicing factor ATP-dependent RNA helicase DHX15                                         | DHX15  | 5  | 6,16  | 10  | 10,00  |
| (B)16hr | Control | Q7L2E3 | Putative ATP-dependent RNA helicase DHX30                                                                  | DHX30  | 7  | 5,28  | 12  | 12,00  |
| (B)16hr | SEEL    | Q7L2E3 | Putative ATP-dependent RNA helicase DHX30                                                                  | DHX30  | 9  | 6,62  | 17  | 17,00  |
| (B)16hr | Control | Q08211 | ATP-dependent RNA helicase A                                                                               | DHX9   | 25 | 19,13 | 83  | 83,00  |
| (B)16hr | Control | Q08211 | ATP-dependent RNA helicase A                                                                               | DHX9   | 8  | 6,06  | 14  | 14,00  |
| (B)16hr | SEEL    | Q08211 | ATP-dependent RNA helicase A                                                                               | DHX9   | 31 | 24,57 | 96  | 96,00  |
| (B)16hr | SEEL    | Q08211 | ATP-dependent RNA helicase A                                                                               | DHX9   | 4  | 4,09  | 7   | 7,00   |
| (B)16hr | Control | Q9Y2L1 | Exosome complex exonuclease RRP44                                                                          | DIS3   | 4  | 5,32  | 6   | 6,00   |
| (B)16hr | Control | B4DJX1 | Acetyltransferase component of pyruvate dehydrogenase complex                                              | DLAT   | 16 | 30,80 | 89  | 89,00  |
| (B)16hr | SEEL    | B4DJX1 | Acetyltransferase component of pyruvate dehydrogenase complex                                              | DLAT   | 8  | 14,55 | 24  | 24,00  |
| (B)16hr | Control | P10515 | Dihydrolipoylysine-residue acetyltransferase component of pyruvate dehydrogenase complex, mitochondrial    | DLAT   | 7  | 10,82 | 26  | 26,00  |
| (B)16hr | Control | P10515 | Dihydrolipoylysine-residue acetyltransferase component of pyruvate dehydrogenase complex, mitochondrial    | DLAT   | 14 | 23,34 | 87  | 87,00  |
| (B)16hr | Control | P10515 | Dihydrolipoylysine-residue acetyltransferase component of pyruvate dehydrogenase complex, mitochondrial    | DLAT   | 12 | 20,71 | 272 | 272,00 |
| (B)16hr | SEEL    | P10515 | Dihydrolipoylysine-residue acetyltransferase component of pyruvate dehydrogenase complex, mitochondrial    | DLAT   | 8  | 13,14 | 33  | 33,00  |
| (B)16hr | SEEL    | P10515 | Dihydrolipoylysine-residue acetyltransferase component of pyruvate dehydrogenase complex, mitochondrial    | DLAT   | 9  | 14,53 | 27  | 27,00  |
| (B)16hr | SEEL    | P10515 | Dihydrolipoylysine-residue acetyltransferase component of pyruvate dehydrogenase complex, mitochondrial    | DLAT   | 27 | 45,29 | 439 | 439,00 |

|         |         |        |                                                                                                                 |         |    |       |     |        |
|---------|---------|--------|-----------------------------------------------------------------------------------------------------------------|---------|----|-------|-----|--------|
| (B)16hr | Control | P09622 | Dihydropolyl dehydrogenase, mitochondrial                                                                       | DLD     | 3  | 5,50  | 6   | 6,00   |
| (B)16hr | Control | P09622 | Dihydropolyl dehydrogenase, mitochondrial                                                                       | DLD     | 7  | 14,73 | 24  | 24,00  |
| (B)16hr | Control | P09622 | Dihydropolyl dehydrogenase, mitochondrial                                                                       | DLD     | 21 | 40,28 | 254 | 254,00 |
| (B)16hr | SEEL    | P09622 | Dihydropolyl dehydrogenase, mitochondrial                                                                       | DLD     | 6  | 13,75 | 22  | 22,00  |
| (B)16hr | Control | P36957 | Dihydropolyllysine-residue succinyltransferase component of 2-oxoglutarate dehydrogenase complex, mitochondrial | DLST    | 5  | 11,70 | 13  | 13,00  |
| (B)16hr | Control | P36957 | Dihydropolyllysine-residue succinyltransferase component of 2-oxoglutarate dehydrogenase complex, mitochondrial | DLST    | 9  | 21,19 | 47  | 47,00  |
| (B)16hr | Control | P36957 | Dihydropolyllysine-residue succinyltransferase component of 2-oxoglutarate dehydrogenase complex, mitochondrial | DLST    | 6  | 13,25 | 24  | 24,00  |
| (B)16hr | SEEL    | Q9NVH1 | DnaJ homolog subfamily C member 11                                                                              | DNAJC11 | 3  | 6,26  | 6   | 6,00   |
| (B)16hr | SEEL    | Q02487 | Desmocollin-2                                                                                                   | DSC2    | 6  | 7,99  | 21  | 21,00  |
| (B)16hr | Control | Q02413 | Desmoglein-1                                                                                                    | DSG1    | 4  | 5,62  | 7   | 7,00   |
| (B)16hr | Control | Q14126 | Desmoglein-2                                                                                                    | DSG2    | 4  | 4,47  | 11  | 11,00  |
| (B)16hr | SEEL    | Q14126 | Desmoglein-2                                                                                                    | DSG2    | 5  | 5,72  | 10  | 10,00  |
| (B)16hr | SEEL    | Q14126 | Desmoglein-2                                                                                                    | DSG2    | 37 | 47,14 | 399 | 399,00 |
| (B)16hr | SEEL    | Q14126 | Desmoglein-2                                                                                                    | DSG2    | 34 | 38,91 | 226 | 226,00 |
| (B)16hr | SEEL    | Q14126 | Desmoglein-2                                                                                                    | DSG2    | 6  | 6,53  | 16  | 16,00  |
| (B)16hr | Control | P15924 | Desmoplakin                                                                                                     | DSP     | 16 | 5,54  | 30  | 30,00  |
| (B)16hr | Control | P15924 | Desmoplakin                                                                                                     | DSP     | 46 | 16,09 | 114 | 114,00 |
| (B)16hr | SEEL    | P15924 | Desmoplakin                                                                                                     | DSP     | 20 | 6,58  | 36  | 36,00  |
| (B)16hr | SEEL    | P15924 | Desmoplakin                                                                                                     | DSP     | 31 | 10,21 | 74  | 74,00  |
| (B)16hr | Control | Q14204 | Cytoplasmic dynein 1 heavy chain 1                                                                              | DYNC1H1 | 19 | 4,52  | 50  | 50,00  |
| (B)16hr | SEEL    | Q14204 | Cytoplasmic dynein 1 heavy chain 1                                                                              | DYNC1H1 | 76 | 16,87 | 257 | 257,00 |
| (B)16hr | SEEL    | Q9Y6G9 | Cytoplasmic dynein 1 light intermediate chain 1                                                                 | DYNC1L1 | 2  | 4,21  | 2   | 2,00   |
| (B)16hr | SEEL    | P42892 | Endothelin-converting enzyme 1                                                                                  | ECE1    | 4  | 6,75  | 12  | 12,00  |
| (B)16hr | SEEL    | P42892 | Endothelin-converting enzyme 1                                                                                  | ECE1    | 28 | 37,92 | 294 | 294,00 |
| (B)16hr | SEEL    | O95672 | Endothelin-converting enzyme-like 1                                                                             | ECEL1   | 4  | 5,81  | 6   | 6,00   |
| (B)16hr | SEEL    | O43854 | EGF-like repeat and discoidin I-like domain-containing protein 3                                                | EDIL3   | 10 | 25,42 | 24  | 24,00  |
| (B)16hr | Control | P68104 | Elongation factor 1-alpha 1                                                                                     | EEF1A1  | 8  | 17,53 | 34  | 34,00  |
| (B)16hr | Control | P68104 | Elongation factor 1-alpha 1                                                                                     | EEF1A1  | 6  | 12,34 | 17  | 17,00  |
| (B)16hr | Control | P68104 | Elongation factor 1-alpha 1                                                                                     | EEF1A1  | 8  | 15,37 | 30  | 30,00  |
| (B)16hr | SEEL    | P68104 | Elongation factor 1-alpha 1                                                                                     | EEF1A1  | 12 | 22,08 | 80  | 80,00  |
| (B)16hr | SEEL    | P68104 | Elongation factor 1-alpha 1                                                                                     | EEF1A1  | 11 | 25,54 | 66  | 66,00  |
| (B)16hr | SEEL    | P68104 | Elongation factor 1-alpha 1                                                                                     | EEF1A1  | 9  | 21,65 | 33  | 33,00  |
| (B)16hr | SEEL    | P68104 | Elongation factor 1-alpha 1                                                                                     | EEF1A1  | 13 | 27,27 | 76  | 76,00  |
| (B)16hr | Control | P13639 | Elongation factor 2                                                                                             | EEF2    | 42 | 47,55 | 326 | 326,00 |
| (B)16hr | Control | P13639 | Elongation factor 2                                                                                             | EEF2    | 6  | 6,06  | 13  | 13,00  |
| (B)16hr | SEEL    | P13639 | Elongation factor 2                                                                                             | EEF2    | 3  | 3,38  | 6   | 6,00   |
| (B)16hr | SEEL    | P13639 | Elongation factor 2                                                                                             | EEF2    | 37 | 45,45 | 185 | 185,00 |
| (B)16hr | SEEL    | P13639 | Elongation factor 2                                                                                             | EEF2    | 5  | 5,24  | 11  | 11,00  |
| (B)16hr | Control | Q15029 | 116 kDa U5 small nuclear ribonucleoprotein component                                                            | EFTUD2  | 6  | 7,41  | 10  | 10,00  |
| (B)16hr | Control | P00533 | Epidermal growth factor receptor                                                                                | EGFR    | 17 | 15,87 | 64  | 64,00  |
| (B)16hr | SEEL    | P00533 | Epidermal growth factor receptor                                                                                | EGFR    | 15 | 13,39 | 64  | 64,00  |
| (B)16hr | SEEL    | P00533 | Epidermal growth factor receptor                                                                                | EGFR    | 59 | 52,98 | 957 | 957,00 |
| (B)16hr | SEEL    | P00533 | Epidermal growth factor receptor                                                                                | EGFR    | 28 | 26,69 | 140 | 140,00 |
| (B)16hr | SEEL    | P00533 | Epidermal growth factor receptor                                                                                | EGFR    | 9  | 9,09  | 31  | 31,00  |
| (B)16hr | Control | P19525 | Interferon-induced, double-stranded RNA-activated protein kinase                                                | EIF2AK2 | 5  | 9,98  | 12  | 12,00  |
| (B)16hr | SEEL    | P60842 | Eukaryotic initiation factor 4A-I                                                                               | EIF4A1  | 3  | 7,88  | 7   | 7,00   |
| (B)16hr | Control | O60841 | Eukaryotic translation initiation factor 5B                                                                     | EIF5B   | 20 | 19,34 | 60  | 60,00  |
| (B)16hr | SEEL    | O60841 | Eukaryotic translation initiation factor 5B                                                                     | EIF5B   | 7  | 7,30  | 16  | 16,00  |
| (B)16hr | SEEL    | P17813 | Endoglin                                                                                                        | ENG     | 4  | 7,60  | 13  | 13,00  |
| (B)16hr | SEEL    | P17813 | Endoglin                                                                                                        | ENG     | 14 | 23,10 | 95  | 95,00  |
| (B)16hr | SEEL    | P17813 | Endoglin                                                                                                        | ENG     | 8  | 16,26 | 29  | 29,00  |
| (B)16hr | SEEL    | P29317 | Ephrin type-A receptor 2                                                                                        | EPHA2   | 3  | 4,00  | 8   | 8,00   |
| (B)16hr | SEEL    | P29323 | Ephrin type-B receptor 2                                                                                        | EPHB2   | 9  | 11,00 | 21  | 21,00  |
| (B)16hr | SEEL    | P54760 | Ephrin type-B receptor 4                                                                                        | EPHB4   | 6  | 6,89  | 13  | 13,00  |
| (B)16hr | SEEL    | P54760 | Ephrin type-B receptor 4                                                                                        | EPHB4   | 34 | 38,50 | 209 | 209,00 |
| (B)16hr | Control | P58107 | Epiplakin                                                                                                       | EPPK1   | 3  | 0,86  | 7   | 7,00   |
| (B)16hr | SEEL    | P58107 | Epiplakin                                                                                                       | EPPK1   | 5  | 1,14  | 12  | 12,00  |
| (B)16hr | Control | P07814 | Bifunctional glutamate/proline--tRNA ligase                                                                     | EPRS    | 18 | 14,95 | 48  | 48,00  |
| (B)16hr | SEEL    | P07814 | Bifunctional glutamate/proline--tRNA ligase                                                                     | EPRS    | 23 | 18,25 | 75  | 75,00  |
| (B)16hr | SEEL    | P04626 | Receptor tyrosine-protein kinase erbB-2                                                                         | ERBB2   | 17 | 15,46 | 76  | 76,00  |
| (B)16hr | SEEL    | P04626 | Receptor tyrosine-protein kinase erbB-2                                                                         | ERBB2   | 5  | 5,50  | 9   | 9,00   |
| (B)16hr | Control | H7BXI1 | Extended synaptotagmin-2 (Fragment)                                                                             | ESYT2   | 13 | 17,19 | 28  | 28,00  |
| (B)16hr | SEEL    | H7BXI1 | Extended synaptotagmin-2 (Fragment)                                                                             | ESYT2   | 8  | 9,50  | 14  | 14,00  |
| (B)16hr | Control | Q01844 | RNA-binding protein EWS                                                                                         | EWSR1   | 3  | 7,32  | 17  | 17,00  |
| (B)16hr | SEEL    | Q9NZB2 | Constitutive coactivator of PPAR-gamma-like protein 1                                                           | FAM120A | 9  | 11,63 | 20  | 20,00  |



|         |         |        |                                                                                                                 |          |    |       |     |        |
|---------|---------|--------|-----------------------------------------------------------------------------------------------------------------|----------|----|-------|-----|--------|
| (B)16hr | Control | P49327 | Fatty acid synthase                                                                                             | FASN     | 37 | 16,25 | 134 | 134,00 |
| (B)16hr | SEEL    | P49327 | Fatty acid synthase                                                                                             | FASN     | 41 | 19,39 | 132 | 132,00 |
| (B)16hr | SEEL    | Q7L8L6 | FAST kinase domain-containing protein 5                                                                         | FASTKD5  | 3  | 3,80  | 6   | 6,00   |
| (B)16hr | SEEL    | P35556 | Fibrillin-2                                                                                                     | FBN2     | 5  | 3,19  | 21  | 21,00  |
| (B)16hr | Control | Q5D862 | Filaggrin-2                                                                                                     | FLG2     | 6  | 4,18  | 19  | 19,00  |
| (B)16hr | Control | Q13045 | Protein flightless-1 homolog                                                                                    | FLII     | 5  | 4,33  | 9   | 9,00   |
| (B)16hr | SEEL    | Q13045 | Protein flightless-1 homolog                                                                                    | FLII     | 3  | 2,52  | 3   | 3,00   |
| (B)16hr | Control | P21333 | Filamin-A                                                                                                       | FLNA     | 4  | 1,93  | 6   | 6,00   |
| (B)16hr | Control | P21333 | Filamin-A                                                                                                       | FLNA     | 56 | 28,22 | 216 | 216,00 |
| (B)16hr | SEEL    | P21333 | Filamin-A                                                                                                       | FLNA     | 2  | 1,10  | 2   | 2,00   |
| (B)16hr | SEEL    | P21333 | Filamin-A                                                                                                       | FLNA     | 39 | 20,51 | 107 | 107,00 |
| (B)16hr | Control | O75369 | Filamin-B                                                                                                       | FLNB     | 9  | 3,73  | 17  | 17,00  |
| (B)16hr | SEEL    | O75369 | Filamin-B                                                                                                       | FLNB     | 6  | 3,15  | 20  | 20,00  |
| (B)16hr | SEEL    | B2RB38 | cDNA, FLV95288, highly similar to Homo sapiens feline leukemia virus subgroup C cellular receptor (FLVCR), mRNA | FLVCR1   | 6  | 14,77 | 18  | 18,00  |
| (B)16hr | SEEL    | Q9Y5Y0 | Feline leukemia virus subgroup C receptor-related protein 1                                                     | FLVCR1   | 2  | 3,96  | 6   | 6,00   |
| (B)16hr | Control | P35637 | RNA-binding protein FUS                                                                                         | FUS      | 5  | 19,20 | 58  | 58,00  |
| (B)16hr | SEEL    | P35637 | RNA-binding protein FUS                                                                                         | FUS      | 6  | 16,92 | 31  | 31,00  |
| (B)16hr | Control | Q14697 | Neutral alpha-glucosidase AB                                                                                    | GANAB    | 14 | 16,95 | 35  | 35,00  |
| (B)16hr | SEEL    | Q14697 | Neutral alpha-glucosidase AB                                                                                    | GANAB    | 7  | 7,84  | 15  | 15,00  |
| (B)16hr | Control | P41250 | Glycine--tRNA ligase                                                                                            | GARS     | 15 | 19,62 | 49  | 49,00  |
| (B)16hr | SEEL    | P41250 | Glycine--tRNA ligase                                                                                            | GARS     | 10 | 15,16 | 24  | 24,00  |
| (B)16hr | Control | P22102 | Trifunctional purine biosynthetic protein adenosine-3                                                           | GART     | 9  | 9,21  | 21  | 21,00  |
| (B)16hr | Control | Q92616 | Translational activator GCN1                                                                                    | GCN1L1   | 4  | 1,57  | 10  | 10,00  |
| (B)16hr | SEEL    | Q92616 | Translational activator GCN1                                                                                    | GCN1L1   | 7  | 2,70  | 15  | 15,00  |
| (B)16hr | Control | P57678 | Gem-associated protein 4                                                                                        | GEMIN4   | 7  | 7,56  | 21  | 21,00  |
| (B)16hr | Control | P57678 | Gem-associated protein 4                                                                                        | GEMIN4   | 5  | 5,10  | 11  | 11,00  |
| (B)16hr | SEEL    | P57678 | Gem-associated protein 4                                                                                        | GEMIN4   | 5  | 5,29  | 10  | 10,00  |
| (B)16hr | SEEL    | Q8WUM5 | Gem (Nuclear organelle) associated protein 4                                                                    | GEMIN4   | 22 | 22,59 | 79  | 79,00  |
| (B)16hr | Control | Q9HBB9 | HC56                                                                                                            | GEMIN4   | 2  | 1,81  | 6   | 6,00   |
| (B)16hr | Control | Q06210 | Glutamine--fructose-6-phosphate aminotransferase [isomerizing] 1                                                | GFPT1    | 4  | 6,44  | 6   | 6,00   |
| (B)16hr | SEEL    | Q06210 | Glutamine--fructose-6-phosphate aminotransferase [isomerizing] 1                                                | GFPT1    | 7  | 13,59 | 12  | 12,00  |
| (B)16hr | SEEL    | P19440 | Gamma-glutamyltranspeptidase 1                                                                                  | GGT1     | 8  | 12,30 | 28  | 28,00  |
| (B)16hr | Control | Q9Y2X7 | ARF GTPase-activating protein GIT1                                                                              | GIT1     | 6  | 9,33  | 14  | 14,00  |
| (B)16hr | Control | Q9Y2X7 | ARF GTPase-activating protein GIT1                                                                              | GIT1     | 33 | 47,57 | 354 | 354,00 |
| (B)16hr | Control | Q9Y2X7 | ARF GTPase-activating protein GIT1                                                                              | GIT1     | 14 | 23,26 | 62  | 62,00  |
| (B)16hr | SEEL    | Q9Y2X7 | ARF GTPase-activating protein GIT1                                                                              | GIT1     | 7  | 9,59  | 22  | 22,00  |
| (B)16hr | Control | Q14161 | ARF GTPase-activating protein GIT2                                                                              | GIT2     | 31 | 45,32 | 264 | 264,00 |
| (B)16hr | Control | Q14161 | ARF GTPase-activating protein GIT2                                                                              | GIT2     | 12 | 15,55 | 38  | 38,00  |
| (B)16hr | SEEL    | Q14161 | ARF GTPase-activating protein GIT2                                                                              | GIT2     | 4  | 5,40  | 10  | 10,00  |
| (B)16hr | SEEL    | Q92896 | Golgi apparatus protein 1                                                                                       | GLG1     | 5  | 5,26  | 12  | 12,00  |
| (B)16hr | Control | P49915 | GMP synthase [glutamine-hydrolyzing]                                                                            | GMPS     | 7  | 11,98 | 17  | 17,00  |
| (B)16hr | SEEL    | P49915 | GMP synthase [glutamine-hydrolyzing]                                                                            | GMPS     | 6  | 9,24  | 13  | 13,00  |
| (B)16hr | Control | Q9BVP2 | Guanine nucleotide-binding protein-like 3                                                                       | GNL3     | 6  | 11,48 | 15  | 15,00  |
| (B)16hr | SEEL    | Q9BVP2 | Guanine nucleotide-binding protein-like 3                                                                       | GNL3     | 5  | 9,47  | 9   | 9,00   |
| (B)16hr | SEEL    | P35052 | Glypican-1                                                                                                      | GPC1     | 15 | 29,93 | 82  | 82,00  |
| (B)16hr | SEEL    | P43304 | Glycerol-3-phosphate dehydrogenase, mitochondrial                                                               | GPD2     | 10 | 16,09 | 20  | 20,00  |
| (B)16hr | SEEL    | Q8NFJ5 | Retinoic acid-induced protein 3                                                                                 | GPRC5A   | 5  | 22,41 | 29  | 29,00  |
| (B)16hr | SEEL    | Q8NFJ5 | Retinoic acid-induced protein 3                                                                                 | GPRC5A   | 4  | 19,33 | 16  | 16,00  |
| (B)16hr | SEEL    | Q8NFJ5 | Retinoic acid-induced protein 3                                                                                 | GPRC5A   | 5  | 19,33 | 13  | 13,00  |
| (B)16hr | SEEL    | Q7Z2K8 | G protein-regulated inducer of neurite outgrowth 1                                                              | GPRIN1   | 2  | 3,08  | 10  | 10,00  |
| (B)16hr | Control | P28799 | Granulins                                                                                                       | GRN      | 9  | 17,71 | 30  | 30,00  |
| (B)16hr | Control | P28799 | Granulins                                                                                                       | GRN      | 16 | 30,35 | 131 | 131,00 |
| (B)16hr | SEEL    | P28799 | Granulins                                                                                                       | GRN      | 5  | 9,11  | 18  | 18,00  |
| (B)16hr | SEEL    | P28799 | Granulins                                                                                                       | GRN      | 12 | 19,06 | 53  | 53,00  |
| (B)16hr | Control | P06396 | Gelsolin                                                                                                        | GSN      | 20 | 24,68 | 88  | 88,00  |
| (B)16hr | Control | Q9BZE4 | Nucleolar GTP-binding protein 1                                                                                 | GTPBP4   | 5  | 8,04  | 11  | 11,00  |
| (B)16hr | SEEL    | Q9BZE4 | Nucleolar GTP-binding protein 1                                                                                 | GTPBP4   | 5  | 8,36  | 12  | 12,00  |
| (B)16hr | Control | P40939 | Trifunctional enzyme subunit alpha, mitochondrial                                                               | HADHA    | 6  | 7,08  | 10  | 10,00  |
| (B)16hr | SEEL    | Q9ULI3 | Protein HEG homolog 1                                                                                           | HEG1     | 4  | 2,97  | 12  | 12,00  |
| (B)16hr | SEEL    | P16403 | Histone H1.2                                                                                                    | HIST1H1C | 3  | 16,43 | 7   | 7,00   |
| (B)16hr | Control | A3R0T7 | Liver histone H1e                                                                                               | HIST1H1E | 6  | 25,57 | 22  | 22,00  |
| (B)16hr | SEEL    | A2V815 | MHC class I antigen (Fragment)                                                                                  | HLA-A    | 2  | 13,55 | 3   | 3,00   |
| (B)16hr | SEEL    | P01891 | HLA class I histocompatibility antigen, A-68 alpha chain                                                        | HLA-A    | 2  | 6,03  | 9   | 9,00   |
| (B)16hr | Control | P61978 | Heterogeneous nuclear ribonucleoprotein K                                                                       | HNRNPK   | 13 | 36,72 | 60  | 60,00  |
| (B)16hr | SEEL    | P61978 | Heterogeneous nuclear ribonucleoprotein K                                                                       | HNRNPK   | 8  | 22,25 | 35  | 35,00  |
| (B)16hr | Control | P14866 | Heterogeneous nuclear ribonucleoprotein L                                                                       | HNRNPL   | 8  | 16,47 | 25  | 25,00  |

|         |         |        |                                                          |          |    |       |      |         |
|---------|---------|--------|----------------------------------------------------------|----------|----|-------|------|---------|
| (B)16hr | SEEL    | P14866 | Heterogeneous nuclear ribonucleoprotein L                | HNRNPL   | 4  | 7,13  | 7    | 7,00    |
| (B)16hr | Control | P52272 | Heterogeneous nuclear ribonucleoprotein M                | HNRNPM   | 13 | 19,32 | 30   | 30,00   |
| (B)16hr | SEEL    | P52272 | Heterogeneous nuclear ribonucleoprotein M                | HNRNPM   | 6  | 9,04  | 16   | 16,00   |
| (B)16hr | Control | Q00839 | Heterogeneous nuclear ribonucleoprotein U                | HNRNPU   | 17 | 20,73 | 74   | 74,00   |
| (B)16hr | SEEL    | Q00839 | Heterogeneous nuclear ribonucleoprotein U                | HNRNPU   | 15 | 18,91 | 41   | 41,00   |
| (B)16hr | SEEL    | Q9BUJ2 | Heterogeneous nuclear ribonucleoprotein U-like protein 1 | HNRNPUL1 | 10 | 15,42 | 38   | 38,00   |
| (B)16hr | Control | Q86Y23 | Hornerin                                                 | HRNR     | 13 | 8,28  | 50   | 50,00   |
| (B)16hr | Control | Q86Y23 | Hornerin                                                 | HRNR     | 3  | 1,93  | 14   | 14,00   |
| (B)16hr | Control | Q86Y23 | Hornerin                                                 | HRNR     | 8  | 4,95  | 37   | 37,00   |
| (B)16hr | Control | Q86Y23 | Hornerin                                                 | HRNR     | 7  | 4,14  | 24   | 24,00   |
| (B)16hr | SEEL    | Q86Y23 | Hornerin                                                 | HRNR     | 2  | 1,05  | 11   | 11,00   |
| (B)16hr | SEEL    | Q86Y23 | Hornerin                                                 | HRNR     | 2  | 1,26  | 14   | 14,00   |
| (B)16hr | Control | P07900 | Heat shock protein HSP 90-alpha                          | HSP90AA1 | 8  | 11,89 | 27   | 27,00   |
| (B)16hr | SEEL    | P07900 | Heat shock protein HSP 90-alpha                          | HSP90AA1 | 2  | 2,87  | 3    | 3,00    |
| (B)16hr | SEEL    | P07900 | Heat shock protein HSP 90-alpha                          | HSP90AA1 | 12 | 15,98 | 57   | 57,00   |
| (B)16hr | Control | P08238 | Heat shock protein HSP 90-beta                           | HSP90AB1 | 20 | 30,66 | 125  | 125,00  |
| (B)16hr | SEEL    | P08238 | Heat shock protein HSP 90-beta                           | HSP90AB1 | 6  | 9,12  | 10   | 10,00   |
| (B)16hr | SEEL    | P08238 | Heat shock protein HSP 90-beta                           | HSP90AB1 | 9  | 11,88 | 32   | 32,00   |
| (B)16hr | SEEL    | P08238 | Heat shock protein HSP 90-beta                           | HSP90AB1 | 23 | 33,56 | 153  | 153,00  |
| (B)16hr | SEEL    | P08238 | Heat shock protein HSP 90-beta                           | HSP90AB1 | 7  | 9,67  | 16   | 16,00   |
| (B)16hr | Control | P14625 | Endoplasmic                                              | HSP90B1  | 17 | 22,42 | 70   | 70,00   |
| (B)16hr | SEEL    | P14625 | Endoplasmic                                              | HSP90B1  | 11 | 14,20 | 34   | 34,00   |
| (B)16hr | SEEL    | P14625 | Endoplasmic                                              | HSP90B1  | 3  | 5,48  | 19   | 19,00   |
| (B)16hr | SEEL    | P08107 | Heat shock 70 kDa protein 1A/1B                          | HSPA1A   | 3  | 4,52  | 4    | 4,00    |
| (B)16hr | Control | P11021 | 78 kDa glucose-regulated protein                         | HSPA5    | 45 | 60,40 | 818  | 818,00  |
| (B)16hr | SEEL    | P11021 | 78 kDa glucose-regulated protein                         | HSPA5    | 47 | 61,16 | 600  | 600,00  |
| (B)16hr | Control | P11142 | Heat shock cognate 71 kDa protein                        | HSPA8    | 36 | 55,57 | 467  | 467,00  |
| (B)16hr | SEEL    | P11142 | Heat shock cognate 71 kDa protein                        | HSPA8    | 35 | 55,88 | 377  | 377,00  |
| (B)16hr | Control | P38646 | Stress-70 protein, mitochondrial                         | HSPA9    | 6  | 10,60 | 20   | 20,00   |
| (B)16hr | Control | P38646 | Stress-70 protein, mitochondrial                         | HSPA9    | 16 | 29,16 | 67   | 67,00   |
| (B)16hr | Control | P38646 | Stress-70 protein, mitochondrial                         | HSPA9    | 60 | 68,04 | 1717 | 1717,00 |
| (B)16hr | SEEL    | P38646 | Stress-70 protein, mitochondrial                         | HSPA9    | 2  | 4,27  | 10   | 10,00   |
| (B)16hr | SEEL    | P38646 | Stress-70 protein, mitochondrial                         | HSPA9    | 8  | 14,43 | 18   | 18,00   |
| (B)16hr | SEEL    | P38646 | Stress-70 protein, mitochondrial                         | HSPA9    | 57 | 63,48 | 1024 | 1024,00 |
| (B)16hr | Control | P10809 | 60 kDa heat shock protein, mitochondrial                 | HSPD1    | 26 | 42,58 | 127  | 127,00  |
| (B)16hr | SEEL    | P10809 | 60 kDa heat shock protein, mitochondrial                 | HSPD1    | 26 | 44,33 | 156  | 156,00  |
| (B)16hr | Control | Q92598 | Heat shock protein 105 kDa                               | HSPH1    | 8  | 10,26 | 19   | 19,00   |
| (B)16hr | SEEL    | Q92598 | Heat shock protein 105 kDa                               | HSPH1    | 12 | 15,03 | 25   | 25,00   |
| (B)16hr | SEEL    | Q72627 | E3 ubiquitin-protein ligase HUWE1                        | HUWE1    | 5  | 1,51  | 10   | 10,00   |
| (B)16hr | Control | Q9Y4L1 | Hypoxia up-regulated protein 1                           | HYOU1    | 7  | 8,41  | 14   | 14,00   |
| (B)16hr | SEEL    | Q9Y4L1 | Hypoxia up-regulated protein 1                           | HYOU1    | 9  | 10,81 | 25   | 25,00   |
| (B)16hr | Control | P41252 | Isoleucine--tRNA ligase, cytoplasmic                     | IARS     | 10 | 9,27  | 25   | 25,00   |
| (B)16hr | SEEL    | P41252 | Isoleucine--tRNA ligase, cytoplasmic                     | IARS     | 19 | 17,04 | 74   | 74,00   |
| (B)16hr | Control | Q9NSE4 | Isoleucine--tRNA ligase, mitochondrial                   | IARS2    | 9  | 10,28 | 24   | 24,00   |
| (B)16hr | SEEL    | Q9NSE4 | Isoleucine--tRNA ligase, mitochondrial                   | IARS2    | 5  | 5,63  | 9    | 9,00    |
| (B)16hr | SEEL    | P05362 | Intercellular adhesion molecule 1                        | ICAM1    | 2  | 4,32  | 5    | 5,00    |
| (B)16hr | SEEL    | P05362 | Intercellular adhesion molecule 1                        | ICAM1    | 10 | 21,62 | 34   | 34,00   |
| (B)16hr | SEEL    | P05362 | Intercellular adhesion molecule 1                        | ICAM1    | 27 | 44,55 | 531  | 531,00  |
| (B)16hr | SEEL    | P05362 | Intercellular adhesion molecule 1                        | ICAM1    | 19 | 33,46 | 170  | 170,00  |
| (B)16hr | Control | Q16666 | Gamma-interferon-inducible protein 16                    | IFI16    | 3  | 4,20  | 6    | 6,00    |
| (B)16hr | SEEL    | P08069 | Insulin-like growth factor 1 receptor                    | IGF1R    | 21 | 16,02 | 66   | 66,00   |
| (B)16hr | SEEL    | P08069 | Insulin-like growth factor 1 receptor                    | IGF1R    | 41 | 35,55 | 355  | 355,00  |
| (B)16hr | SEEL    | P08069 | Insulin-like growth factor 1 receptor                    | IGF1R    | 9  | 6,80  | 28   | 28,00   |
| (B)16hr | SEEL    | P11717 | Cation-independent mannose-6-phosphate receptor          | IGF2R    | 29 | 12,00 | 87   | 87,00   |
| (B)16hr | SEEL    | P11717 | Cation-independent mannose-6-phosphate receptor          | IGF2R    | 50 | 21,20 | 202  | 202,00  |
| (B)16hr | SEEL    | Q969P0 | Immunoglobulin superfamily member 8                      | IGSF8    | 7  | 14,68 | 24   | 24,00   |
| (B)16hr | SEEL    | Q9NPH3 | Interleukin-1 receptor accessory protein                 | IL1RAP   | 5  | 12,28 | 9    | 9,00    |
| (B)16hr | SEEL    | Q16891 | MICOS complex subunit MIC60                              | IMMT     | 8  | 11,35 | 14   | 14,00   |
| (B)16hr | SEEL    | P06213 | Insulin receptor                                         | INSR     | 20 | 14,47 | 75   | 75,00   |
| (B)16hr | SEEL    | P06213 | Insulin receptor                                         | INSR     | 43 | 29,09 | 322  | 322,00  |
| (B)16hr | SEEL    | P06213 | Insulin receptor                                         | INSR     | 6  | 4,41  | 16   | 16,00   |
| (B)16hr | Control | P46940 | Ras GTPase-activating-like protein IQGAP1                | IQGAP1   | 10 | 7,30  | 21   | 21,00   |
| (B)16hr | SEEL    | P46940 | Ras GTPase-activating-like protein IQGAP1                | IQGAP1   | 14 | 11,04 | 28   | 28,00   |
| (B)16hr | SEEL    | Q8TB96 | T-cell immunomodulatory protein                          | ITFG1    | 4  | 6,86  | 18   | 18,00   |
| (B)16hr | SEEL    | Q9H0X4 | Protein ITFG3                                            | ITFG3    | 11 | 21,74 | 60   | 60,00   |
| (B)16hr | SEEL    | P56199 | Integrin alpha-1                                         | ITGA1    | 8  | 7,04  | 19   | 19,00   |

|         |         |        |                                                                          |           |    |       |     |        |
|---------|---------|--------|--------------------------------------------------------------------------|-----------|----|-------|-----|--------|
| (B)16hr | SEEL    | P56199 | Integrin alpha-1                                                         | ITGA1     | 29 | 23,92 | 195 | 195,00 |
| (B)16hr | Control | P17301 | Integrin alpha-2                                                         | ITGA2     | 4  | 3,73  | 7   | 7,00   |
| (B)16hr | SEEL    | P17301 | Integrin alpha-2                                                         | ITGA2     | 16 | 13,72 | 52  | 52,00  |
| (B)16hr | SEEL    | P17301 | Integrin alpha-2                                                         | ITGA2     | 7  | 8,98  | 57  | 57,00  |
| (B)16hr | SEEL    | P17301 | Integrin alpha-2                                                         | ITGA2     | 14 | 14,14 | 50  | 50,00  |
| (B)16hr | SEEL    | P26006 | Integrin alpha-3                                                         | ITGA3     | 11 | 10,47 | 61  | 61,00  |
| (B)16hr | SEEL    | P26006 | Integrin alpha-3                                                         | ITGA3     | 15 | 13,99 | 159 | 159,00 |
| (B)16hr | Control | P08648 | Integrin alpha-5                                                         | ITGA5     | 5  | 5,82  | 20  | 20,00  |
| (B)16hr | SEEL    | P08648 | Integrin alpha-5                                                         | ITGA5     | 16 | 19,73 | 119 | 119,00 |
| (B)16hr | SEEL    | P08648 | Integrin alpha-5                                                         | ITGA5     | 10 | 11,73 | 46  | 46,00  |
| (B)16hr | SEEL    | P23229 | Integrin alpha-6                                                         | ITGA6     | 29 | 28,50 | 168 | 168,00 |
| (B)16hr | SEEL    | P23229 | Integrin alpha-6                                                         | ITGA6     | 10 | 11,06 | 36  | 36,00  |
| (B)16hr | SEEL    | A5YM53 | ITGAV protein                                                            | ITGAV     | 42 | 43,51 | 349 | 349,00 |
| (B)16hr | SEEL    | P06756 | Integrin alpha-V                                                         | ITGAV     | 31 | 36,45 | 148 | 148,00 |
| (B)16hr | Control | P05556 | Integrin beta-1                                                          | ITGB1     | 12 | 16,29 | 40  | 40,00  |
| (B)16hr | SEEL    | P05556 | Integrin beta-1                                                          | ITGB1     | 3  | 3,76  | 5   | 5,00   |
| (B)16hr | SEEL    | P05556 | Integrin beta-1                                                          | ITGB1     | 28 | 33,96 | 447 | 447,00 |
| (B)16hr | SEEL    | P05556 | Integrin beta-1                                                          | ITGB1     | 26 | 32,21 | 318 | 318,00 |
| (B)16hr | SEEL    | P05556 | Integrin beta-1                                                          | ITGB1     | 6  | 8,52  | 12  | 12,00  |
| (B)16hr | SEEL    | P16144 | Integrin beta-4                                                          | ITGB4     | 47 | 29,03 | 192 | 192,00 |
| (B)16hr | SEEL    | P18084 | Integrin beta-5                                                          | ITGB5     | 28 | 39,55 | 144 | 144,00 |
| (B)16hr | SEEL    | P26012 | Integrin beta-8                                                          | ITGB8     | 6  | 9,49  | 19  | 19,00  |
| (B)16hr | SEEL    | P14923 | Junction plakoglobin                                                     | JUP       | 9  | 13,96 | 18  | 18,00  |
| (B)16hr | SEEL    | P14923 | Junction plakoglobin                                                     | JUP       | 21 | 37,99 | 132 | 132,00 |
| (B)16hr | SEEL    | P14923 | Junction plakoglobin                                                     | JUP       | 21 | 36,24 | 202 | 202,00 |
| (B)16hr | SEEL    | Q92945 | Far upstream element-binding protein 2                                   | KHSRP     | 3  | 4,92  | 8   | 8,00   |
| (B)16hr | SEEL    | Q6NSJ0 | Uncharacterized family 31 glucosidase KIAA1161                           | KIAA1161  | 11 | 15,55 | 29  | 29,00  |
| (B)16hr | SEEL    | Q9HCM3 | UPF0606 protein KIAA1549                                                 | KIAA1549  | 7  | 3,85  | 25  | 25,00  |
| (B)16hr | SEEL    | Q9HCM3 | UPF0606 protein KIAA1549                                                 | KIAA1549  | 5  | 3,18  | 13  | 13,00  |
| (B)16hr | SEEL    | Q9HCM3 | UPF0606 protein KIAA1549                                                 | KIAA1549  | 7  | 4,67  | 15  | 15,00  |
| (B)16hr | SEEL    | Q9ULH0 | Kinase D-interacting substrate of 220 kDa                                | KIDINS220 | 6  | 3,56  | 13  | 13,00  |
| (B)16hr | SEEL    | Q96J84 | Kin of IRRE-like protein 1                                               | KIRREL    | 6  | 10,44 | 16  | 16,00  |
| (B)16hr | Control | Q53GT1 | Kelch-like protein 22                                                    | KLHL22    | 21 | 37,70 | 90  | 90,00  |
| (B)16hr | SEEL    | Q53GT1 | Kelch-like protein 22                                                    | KLHL22    | 13 | 21,14 | 41  | 41,00  |
| (B)16hr | Control | Q14974 | Importin subunit beta-1                                                  | KPNB1     | 6  | 7,42  | 16  | 16,00  |
| (B)16hr | SEEL    | Q14974 | Importin subunit beta-1                                                  | KPNB1     | 7  | 9,59  | 19  | 19,00  |
| (B)16hr | Control | Q5T749 | Keratinocyte proline-rich protein                                        | KPRP      | 5  | 11,40 | 16  | 16,00  |
| (B)16hr | SEEL    | P32004 | Neural cell adhesion molecule L1                                         | L1CAM     | 5  | 3,74  | 12  | 12,00  |
| (B)16hr | SEEL    | P32004 | Neural cell adhesion molecule L1                                         | L1CAM     | 40 | 34,92 | 589 | 589,00 |
| (B)16hr | SEEL    | P32004 | Neural cell adhesion molecule L1                                         | L1CAM     | 13 | 12,09 | 55  | 55,00  |
| (B)16hr | SEEL    | P32004 | Neural cell adhesion molecule L1                                         | L1CAM     | 6  | 3,74  | 27  | 27,00  |
| (B)16hr | SEEL    | O15230 | Laminin subunit alpha-5                                                  | LAMA5     | 9  | 3,06  | 18  | 18,00  |
| (B)16hr | SEEL    | P11047 | Laminin subunit gamma-1                                                  | LAMC1     | 5  | 4,23  | 12  | 12,00  |
| (B)16hr | SEEL    | P11279 | Lysosome-associated membrane glycoprotein 1                              | LAMP1     | 6  | 14,15 | 23  | 23,00  |
| (B)16hr | Control | Q9P2J5 | Leucine--tRNA ligase, cytoplasmic                                        | LARS      | 6  | 5,10  | 14  | 14,00  |
| (B)16hr | SEEL    | Q9P2J5 | Leucine--tRNA ligase, cytoplasmic                                        | LARS      | 4  | 3,57  | 7   | 7,00   |
| (B)16hr | SEEL    | P00338 | L-lactate dehydrogenase A chain                                          | LDHA      | 2  | 6,63  | 4   | 4,00   |
| (B)16hr | Control | Q08380 | Galectin-3-binding protein                                               | LGALS3BP  | 11 | 18,46 | 36  | 36,00  |
| (B)16hr | SEEL    | Q08380 | Galectin-3-binding protein                                               | LGALS3BP  | 8  | 14,19 | 27  | 27,00  |
| (B)16hr | Control | P02545 | Prelamin-A/C                                                             | LMNA      | 29 | 47,59 | 166 | 166,00 |
| (B)16hr | SEEL    | P02545 | Prelamin-A/C                                                             | LMNA      | 26 | 40,81 | 114 | 114,00 |
| (B)16hr | Control | Q9UIQ6 | Leucyl-cystinyl aminopeptidase                                           | LNPEP     | 8  | 10,05 | 18  | 18,00  |
| (B)16hr | SEEL    | Q9UIQ6 | Leucyl-cystinyl aminopeptidase                                           | LNPEP     | 26 | 25,37 | 140 | 140,00 |
| (B)16hr | Control | P36776 | Lon protease homolog, mitochondrial                                      | LONP1     | 6  | 6,67  | 12  | 12,00  |
| (B)16hr | SEEL    | P36776 | Lon protease homolog, mitochondrial                                      | LONP1     | 5  | 5,84  | 12  | 12,00  |
| (B)16hr | SEEL    | Q9P244 | Leucine-rich repeat and fibronectin type III domain-containing protein 1 | LRFN1     | 6  | 9,34  | 11  | 11,00  |
| (B)16hr | SEEL    | Q6PJG9 | Leucine-rich repeat and fibronectin type-III domain-containing protein 4 | LRFN4     | 5  | 8,82  | 12  | 12,00  |
| (B)16hr | SEEL    | Q07954 | Prolow-density lipoprotein receptor-related protein 1                    | LRP1      | 6  | 1,54  | 27  | 27,00  |
| (B)16hr | SEEL    | B7ZLD0 | LRP6 protein                                                             | LRP6      | 7  | 4,72  | 14  | 14,00  |
| (B)16hr | Control | P42704 | Leucine-rich PPR motif-containing protein, mitochondrial                 | LRPPRC    | 4  | 3,16  | 7   | 7,00   |
| (B)16hr | SEEL    | P42704 | Leucine-rich PPR motif-containing protein, mitochondrial                 | LRPPRC    | 6  | 4,66  | 14  | 14,00  |
| (B)16hr | SEEL    | Q8IWT6 | Volume-regulated anion channel subunit LRRC8A                            | LRRC8A    | 11 | 14,07 | 40  | 40,00  |
| (B)16hr | SEEL    | Q8IWT6 | Volume-regulated anion channel subunit LRRC8A                            | LRRC8A    | 23 | 31,85 | 90  | 90,00  |
| (B)16hr | SEEL    | Q8IWT6 | Volume-regulated anion channel subunit LRRC8A                            | LRRC8A    | 29 | 40,37 | 172 | 172,00 |
| (B)16hr | SEEL    | Q8TDW0 | Volume-regulated anion channel subunit LRRC8C                            | LRRC8C    | 4  | 5,11  | 16  | 16,00  |
| (B)16hr | SEEL    | Q8TDW0 | Volume-regulated anion channel subunit LRRC8C                            | LRRC8C    | 8  | 11,21 | 19  | 19,00  |

|         |         |        |                                                              |         |    |       |      |         |
|---------|---------|--------|--------------------------------------------------------------|---------|----|-------|------|---------|
| (B)16hr | SEEL    | Q7L1W4 | Volume-regulated anion channel subunit LRRC8D                | LRRC8D  | 9  | 11,66 | 21   | 21,00   |
| (B)16hr | SEEL    | Q7L1W4 | Volume-regulated anion channel subunit LRRC8D                | LRRC8D  | 10 | 13,52 | 23   | 23,00   |
| (B)16hr | SEEL    | Q7L1W4 | Volume-regulated anion channel subunit LRRC8D                | LRRC8D  | 16 | 20,16 | 42   | 42,00   |
| (B)16hr | SEEL    | Q6NSJ5 | Volume-regulated anion channel subunit LRRC8E                | LRRC8E  | 10 | 12,94 | 32   | 32,00   |
| (B)16hr | SEEL    | Q6NSJ5 | Volume-regulated anion channel subunit LRRC8E                | LRRC8E  | 11 | 16,46 | 31   | 31,00   |
| (B)16hr | SEEL    | Q6NSJ5 | Volume-regulated anion channel subunit LRRC8E                | LRRC8E  | 7  | 11,06 | 23   | 23,00   |
| (B)16hr | Control | O95232 | Luc7-like protein 3                                          | LUC7L3  | 3  | 7,87  | 4    | 4,00    |
| (B)16hr | Control | P56192 | Methionine--tRNA ligase, cytoplasmic                         | MARS    | 11 | 14,56 | 22   | 22,00   |
| (B)16hr | SEEL    | P56192 | Methionine--tRNA ligase, cytoplasmic                         | MARS    | 9  | 11,89 | 21   | 21,00   |
| (B)16hr | SEEL    | P43121 | Cell surface glycoprotein MUC18                              | MCAM    | 6  | 10,22 | 13   | 13,00   |
| (B)16hr | SEEL    | P43121 | Cell surface glycoprotein MUC18                              | MCAM    | 29 | 42,41 | 213  | 213,00  |
| (B)16hr | SEEL    | P43121 | Cell surface glycoprotein MUC18                              | MCAM    | 39 | 53,87 | 1015 | 1015,00 |
| (B)16hr | SEEL    | P43121 | Cell surface glycoprotein MUC18                              | MCAM    | 20 | 34,83 | 154  | 154,00  |
| (B)16hr | Control | Q96RQ3 | Methylcrotonoyl-CoA carboxylase subunit alpha, mitochondrial | MCCC1   | 4  | 6,90  | 8    | 8,00    |
| (B)16hr | Control | Q96RQ3 | Methylcrotonoyl-CoA carboxylase subunit alpha, mitochondrial | MCCC1   | 10 | 15,72 | 31   | 31,00   |
| (B)16hr | Control | Q96RQ3 | Methylcrotonoyl-CoA carboxylase subunit alpha, mitochondrial | MCCC1   | 15 | 20,97 | 50   | 50,00   |
| (B)16hr | Control | Q96RQ3 | Methylcrotonoyl-CoA carboxylase subunit alpha, mitochondrial | MCCC1   | 36 | 58,34 | 728  | 728,00  |
| (B)16hr | SEEL    | Q96RQ3 | Methylcrotonoyl-CoA carboxylase subunit alpha, mitochondrial | MCCC1   | 5  | 7,72  | 11   | 11,00   |
| (B)16hr | SEEL    | Q96RQ3 | Methylcrotonoyl-CoA carboxylase subunit alpha, mitochondrial | MCCC1   | 5  | 8,14  | 11   | 11,00   |
| (B)16hr | SEEL    | Q96RQ3 | Methylcrotonoyl-CoA carboxylase subunit alpha, mitochondrial | MCCC1   | 9  | 13,66 | 17   | 17,00   |
| (B)16hr | SEEL    | Q96RQ3 | Methylcrotonoyl-CoA carboxylase subunit alpha, mitochondrial | MCCC1   | 33 | 53,10 | 428  | 428,00  |
| (B)16hr | Control | Q9HCC0 | Methylcrotonoyl-CoA carboxylase beta chain, mitochondrial    | MCCC2   | 34 | 54,17 | 774  | 774,00  |
| (B)16hr | SEEL    | Q9HCC0 | Methylcrotonoyl-CoA carboxylase beta chain, mitochondrial    | MCCC2   | 32 | 54,71 | 488  | 488,00  |
| (B)16hr | Control | P49736 | DNA replication licensing factor MCM2                        | MCM2    | 11 | 13,61 | 30   | 30,00   |
| (B)16hr | SEEL    | P49736 | DNA replication licensing factor MCM2                        | MCM2    | 7  | 9,18  | 17   | 17,00   |
| (B)16hr | Control | P25205 | DNA replication licensing factor MCM3                        | MCM3    | 17 | 22,40 | 42   | 42,00   |
| (B)16hr | SEEL    | P25205 | DNA replication licensing factor MCM3                        | MCM3    | 14 | 17,57 | 33   | 33,00   |
| (B)16hr | Control | P33991 | DNA replication licensing factor MCM4                        | MCM4    | 24 | 31,52 | 93   | 93,00   |
| (B)16hr | SEEL    | P33991 | DNA replication licensing factor MCM4                        | MCM4    | 15 | 17,96 | 50   | 50,00   |
| (B)16hr | Control | P33992 | DNA replication licensing factor MCM5                        | MCM5    | 20 | 27,38 | 75   | 75,00   |
| (B)16hr | SEEL    | P33992 | DNA replication licensing factor MCM5                        | MCM5    | 14 | 19,62 | 38   | 38,00   |
| (B)16hr | Control | Q14566 | DNA replication licensing factor MCM6                        | MCM6    | 26 | 31,43 | 112  | 112,00  |
| (B)16hr | SEEL    | Q14566 | DNA replication licensing factor MCM6                        | MCM6    | 20 | 24,85 | 61   | 61,00   |
| (B)16hr | Control | P33993 | DNA replication licensing factor MCM7                        | MCM7    | 25 | 42,42 | 93   | 93,00   |
| (B)16hr | Control | P33993 | DNA replication licensing factor MCM7                        | MCM7    | 19 | 32,96 | 67   | 67,00   |
| (B)16hr | SEEL    | P33993 | DNA replication licensing factor MCM7                        | MCM7    | 21 | 35,47 | 75   | 75,00   |
| (B)16hr | SEEL    | P33993 | DNA replication licensing factor MCM7                        | MCM7    | 13 | 22,39 | 38   | 38,00   |
| (B)16hr | SEEL    | Q9P1T7 | MyoD family inhibitor domain-containing protein              | MDFIC   | 3  | 17,07 | 6    | 6,00    |
| (B)16hr | SEEL    | Q9H1U4 | Multiple epidermal growth factor-like domains protein 9      | MEGF9   | 4  | 7,14  | 14   | 14,00   |
| (B)16hr | Control | P08581 | Hepatocyte growth factor receptor                            | MET     | 4  | 2,45  | 6    | 6,00    |
| (B)16hr | SEEL    | P08581 | Hepatocyte growth factor receptor                            | MET     | 33 | 24,82 | 163  | 163,00  |
| (B)16hr | SEEL    | P08581 | Hepatocyte growth factor receptor                            | MET     | 20 | 15,40 | 82   | 82,00   |
| (B)16hr | SEEL    | P08582 | Melanotransferrin                                            | MF12    | 6  | 8,94  | 10   | 10,00   |
| (B)16hr | SEEL    | O60291 | E3 ubiquitin-protein ligase MGRN1                            | MGRN1   | 3  | 6,88  | 11   | 11,00   |
| (B)16hr | Control | Q8IVT2 | Mitotic interactor and substrate of PLK1                     | MISP    | 6  | 11,34 | 25   | 25,00   |
| (B)16hr | Control | Q8IVT2 | Mitotic interactor and substrate of PLK1                     | MISP    | 6  | 11,19 | 20   | 20,00   |
| (B)16hr | Control | Q6WCQ1 | Myosin phosphatase Rho-interacting protein                   | MPRIIP  | 6  | 8,20  | 13   | 13,00   |
| (B)16hr | SEEL    | Q9UBG0 | C-type mannose receptor 2                                    | MRC2    | 9  | 7,78  | 23   | 23,00   |
| (B)16hr | Control | P43246 | DNA mismatch repair protein Msh2                             | MSH2    | 9  | 10,49 | 26   | 26,00   |
| (B)16hr | SEEL    | P43246 | DNA mismatch repair protein Msh2                             | MSH2    | 6  | 6,42  | 9    | 9,00    |
| (B)16hr | SEEL    | P52701 | DNA mismatch repair protein Msh6                             | MSH6    | 3  | 2,28  | 4    | 4,00    |
| (B)16hr | Control | Q86UE4 | Protein LYRIC                                                | MTDH    | 4  | 8,42  | 11   | 11,00   |
| (B)16hr | Control | P11586 | C-1-tetrahydrofolate synthase, cytoplasmic                   | MTHFD1  | 23 | 24,28 | 56   | 56,00   |
| (B)16hr | SEEL    | P11586 | C-1-tetrahydrofolate synthase, cytoplasmic                   | MTHFD1  | 18 | 18,40 | 51   | 51,00   |
| (B)16hr | Control | Q6UB35 | Monofunctional C1-tetrahydrofolate synthase, mitochondrial   | MTHFD1L | 10 | 9,61  | 22   | 22,00   |
| (B)16hr | SEEL    | Q6UB35 | Monofunctional C1-tetrahydrofolate synthase, mitochondrial   | MTHFD1L | 6  | 6,65  | 11   | 11,00   |
| (B)16hr | SEEL    | P15941 | Mucin-1                                                      | MUC1    | 2  | 1,75  | 17   | 17,00   |
| (B)16hr | Control | Q8WXI7 | Mucin-16                                                     | MUC16   | 5  | 0,28  | 14   | 14,00   |
| (B)16hr | SEEL    | Q8WXI7 | Mucin-16                                                     | MUC16   | 14 | 0,77  | 84   | 84,00   |
| (B)16hr | SEEL    | Q8WXI7 | Mucin-16                                                     | MUC16   | 8  | 0,40  | 15   | 15,00   |
| (B)16hr | SEEL    | Q99102 | Mucin-4                                                      | MUC4    | 2  | 1,11  | 5    | 5,00    |
| (B)16hr | Control | Q14764 | Major vault protein                                          | MVP     | 23 | 30,35 | 88   | 88,00   |
| (B)16hr | SEEL    | Q14764 | Major vault protein                                          | MVP     | 9  | 10,41 | 22   | 22,00   |
| (B)16hr | Control | Q9BQG0 | Myb-binding protein 1A                                       | MYBBP1A | 5  | 3,54  | 12   | 12,00   |
| (B)16hr | SEEL    | Q9BQG0 | Myb-binding protein 1A                                       | MYBBP1A | 13 | 9,86  | 33   | 33,00   |
| (B)16hr | Control | P35580 | Myosin-10                                                    | MYH10   | 8  | 4,05  | 19   | 19,00   |

|         |         |        |                                                                    |         |     |       |      |         |
|---------|---------|--------|--------------------------------------------------------------------|---------|-----|-------|------|---------|
| (B)16hr | Control | P35580 | Myosin-10                                                          | MYH10   | 2   | 0,56  | 31   | 31,00   |
| (B)16hr | Control | P35580 | Myosin-10                                                          | MYH10   | 8   | 5,11  | 17   | 17,00   |
| (B)16hr | Control | P35580 | Myosin-10                                                          | MYH10   | 2   | 0,96  | 4    | 4,00    |
| (B)16hr | SEEL    | P35580 | Myosin-10                                                          | MYH10   | 68  | 34,62 | 300  | 300,00  |
| (B)16hr | Control | P35749 | Myosin-11                                                          | MYH11   | 2   | 1,12  | 8    | 8,00    |
| (B)16hr | Control | Q72406 | Myosin-14                                                          | MYH14   | 2   | 0,95  | 11   | 11,00   |
| (B)16hr | Control | P35579 | Myosin-9                                                           | MYH9    | 127 | 55,36 | 1689 | 1689,00 |
| (B)16hr | Control | P35579 | Myosin-9                                                           | MYH9    | 188 | 63,62 | 4434 | 4434,00 |
| (B)16hr | Control | P35579 | Myosin-9                                                           | MYH9    | 73  | 37,04 | 336  | 336,00  |
| (B)16hr | Control | P35579 | Myosin-9                                                           | MYH9    | 19  | 11,07 | 70   | 70,00   |
| (B)16hr | SEEL    | P35579 | Myosin-9                                                           | MYH9    | 124 | 56,17 | 926  | 926,00  |
| (B)16hr | SEEL    | P35579 | Myosin-9                                                           | MYH9    | 133 | 55,71 | 1518 | 1518,00 |
| (B)16hr | SEEL    | P35579 | Myosin-9                                                           | MYH9    | 14  | 8,32  | 31   | 31,00   |
| (B)16hr | SEEL    | P35579 | Myosin-9                                                           | MYH9    | 5   | 3,16  | 7    | 7,00    |
| (B)16hr | Control | O43795 | Unconventional myosin-Ib                                           | MYO1B   | 8   | 7,83  | 17   | 17,00   |
| (B)16hr | Control | O43795 | Unconventional myosin-Ib                                           | MYO1B   | 12  | 11,44 | 26   | 26,00   |
| (B)16hr | Control | O43795 | Unconventional myosin-Ib                                           | MYO1B   | 48  | 41,02 | 325  | 325,00  |
| (B)16hr | SEEL    | O43795 | Unconventional myosin-Ib                                           | MYO1B   | 4   | 3,52  | 7    | 7,00    |
| (B)16hr | SEEL    | O43795 | Unconventional myosin-Ib                                           | MYO1B   | 22  | 20,60 | 65   | 65,00   |
| (B)16hr | Control | O00159 | Unconventional myosin-Ic                                           | MYO1C   | 2   | 2,07  | 3    | 3,00    |
| (B)16hr | Control | Q12965 | Unconventional myosin-Ie                                           | MYO1E   | 18  | 18,14 | 57   | 57,00   |
| (B)16hr | SEEL    | Q12965 | Unconventional myosin-Ie                                           | MYO1E   | 7   | 6,50  | 20   | 20,00   |
| (B)16hr | Control | Q9Y411 | Unconventional myosin-Va                                           | MYO5A   | 11  | 6,90  | 24   | 24,00   |
| (B)16hr | Control | Q9Y411 | Unconventional myosin-Va                                           | MYO5A   | 16  | 9,97  | 37   | 37,00   |
| (B)16hr | SEEL    | Q9Y411 | Unconventional myosin-Va                                           | MYO5A   | 6   | 3,40  | 10   | 10,00   |
| (B)16hr | Control | Q9ULV0 | Unconventional myosin-Vb                                           | MYO5B   | 2   | 1,73  | 7    | 7,00    |
| (B)16hr | Control | Q9NQX4 | Unconventional myosin-Vc                                           | MYO5C   | 5   | 2,99  | 10   | 10,00   |
| (B)16hr | Control | Q9UM54 | Unconventional myosin-VI                                           | MYO6    | 4   | 4,02  | 5    | 5,00    |
| (B)16hr | SEEL    | Q9NZM1 | Myoferlin                                                          | MYOF    | 42  | 24,02 | 156  | 156,00  |
| (B)16hr | Control | Q9H0A0 | N-acetyltransferase 10                                             | NAT10   | 9   | 9,56  | 20   | 20,00   |
| (B)16hr | SEEL    | Q9H0A0 | N-acetyltransferase 10                                             | NAT10   | 10  | 10,05 | 24   | 24,00   |
| (B)16hr | SEEL    | B3KTP9 | cDNA FLJ38578 fis, clone HCHON2007674, highly similar to NUCLEOLIN | NCL     | 9   | 12,95 | 19   | 19,00   |
| (B)16hr | Control | P19338 | Nucleolin                                                          | NCL     | 13  | 17,46 | 46   | 46,00   |
| (B)16hr | SEEL    | Q969V3 | Nicalin                                                            | NCLN    | 3   | 5,51  | 12   | 12,00   |
| (B)16hr | SEEL    | Q68D85 | Natural cytotoxicity triggering receptor 3 ligand 1                | NCR3LG1 | 9   | 23,57 | 29   | 29,00   |
| (B)16hr | SEEL    | Q92542 | Nicastrin                                                          | NCSTN   | 8   | 10,44 | 49   | 49,00   |
| (B)16hr | SEEL    | Q92542 | Nicastrin                                                          | NCSTN   | 13  | 21,86 | 157  | 157,00  |
| (B)16hr | SEEL    | Q92859 | Neogenin                                                           | NEO1    | 2   | 1,85  | 3    | 3,00    |
| (B)16hr | Control | O15226 | NF-kappa-B-repressing factor                                       | NKRF    | 4   | 6,09  | 8    | 8,00    |
| (B)16hr | Control | Q13423 | NAD(P) transhydrogenase, mitochondrial                             | NNT     | 6   | 5,71  | 11   | 11,00   |
| (B)16hr | Control | Q15233 | Non-POU domain-containing octamer-binding protein                  | NONO    | 4   | 6,79  | 27   | 27,00   |
| (B)16hr | SEEL    | Q15233 | Non-POU domain-containing octamer-binding protein                  | NONO    | 3   | 5,10  | 14   | 14,00   |
| (B)16hr | Control | O00567 | Nucleolar protein 56                                               | NOP56   | 13  | 23,91 | 61   | 61,00   |
| (B)16hr | SEEL    | O00567 | Nucleolar protein 56                                               | NOP56   | 6   | 10,27 | 19   | 19,00   |
| (B)16hr | Control | Q9Y2X3 | Nucleolar protein 58                                               | NOP58   | 7   | 16,45 | 20   | 20,00   |
| (B)16hr | SEEL    | Q9Y2X3 | Nucleolar protein 58                                               | NOP58   | 3   | 6,81  | 10   | 10,00   |
| (B)16hr | SEEL    | Q04721 | Neurogenic locus notch homolog protein 2                           | NOTCH2  | 2   | 0,97  | 2    | 2,00    |
| (B)16hr | SEEL    | Q04721 | Neurogenic locus notch homolog protein 2                           | NOTCH2  | 11  | 5,50  | 25   | 25,00   |
| (B)16hr | SEEL    | Q04721 | Neurogenic locus notch homolog protein 2                           | NOTCH2  | 5   | 2,39  | 13   | 13,00   |
| (B)16hr | Control | P55786 | Puromycin-sensitive aminopeptidase                                 | NPEPPS  | 18  | 19,26 | 40   | 40,00   |
| (B)16hr | SEEL    | P55786 | Puromycin-sensitive aminopeptidase                                 | NPEPPS  | 8   | 9,79  | 17   | 17,00   |
| (B)16hr | SEEL    | P16066 | Atrial natriuretic peptide receptor 1                              | NPR1    | 17  | 18,19 | 42   | 42,00   |
| (B)16hr | SEEL    | P17342 | Atrial natriuretic peptide receptor 3                              | NPR3    | 6   | 10,72 | 15   | 15,00   |
| (B)16hr | SEEL    | Q9Y639 | Neuroplastin                                                       | NPTN    | 9   | 21,61 | 47   | 47,00   |
| (B)16hr | SEEL    | Q9Y639 | Neuroplastin                                                       | NPTN    | 8   | 20,10 | 109  | 109,00  |
| (B)16hr | SEEL    | Q92823 | Neuronal cell adhesion molecule                                    | NRCAM   | 4   | 3,91  | 10   | 10,00   |
| (B)16hr | SEEL    | O14786 | Neuropilin-1                                                       | NRP1    | 3   | 5,42  | 14   | 14,00   |
| (B)16hr | SEEL    | O14786 | Neuropilin-1                                                       | NRP1    | 4   | 7,04  | 7    | 7,00    |
| (B)16hr | SEEL    | O14786 | Neuropilin-1                                                       | NRP1    | 3   | 5,31  | 6    | 6,00    |
| (B)16hr | Control | Q08J23 | tRNA (cytosine(34)-C(5))-methyltransferase                         | NSUN2   | 18  | 27,25 | 62   | 62,00   |
| (B)16hr | SEEL    | Q08J23 | tRNA (cytosine(34)-C(5))-methyltransferase                         | NSUN2   | 16  | 22,95 | 45   | 45,00   |
| (B)16hr | SEEL    | P21589 | 5'-nucleotidase                                                    | NTSE    | 10  | 22,47 | 30   | 30,00   |
| (B)16hr | Control | Q14980 | Nuclear mitotic apparatus protein 1                                | NUMA1   | 22  | 11,21 | 47   | 47,00   |
| (B)16hr | SEEL    | Q14980 | Nuclear mitotic apparatus protein 1                                | NUMA1   | 6   | 3,59  | 9    | 9,00    |
| (B)16hr | SEEL    | Q14980 | Nuclear mitotic apparatus protein 1                                | NUMA1   | 16  | 7,99  | 33   | 33,00   |
| (B)16hr | SEEL    | Q12769 | Nuclear pore complex protein Nup160                                | NUP160  | 3   | 1,88  | 6    | 6,00    |

|         |         |        |                                                                                                        |         |     |       |      |         |
|---------|---------|--------|--------------------------------------------------------------------------------------------------------|---------|-----|-------|------|---------|
| (B)16hr | Control | Q92621 | Nuclear pore complex protein Nup205                                                                    | NUP205  | 4   | 2,29  | 10   | 10,00   |
| (B)16hr | SEEL    | Q92621 | Nuclear pore complex protein Nup205                                                                    | NUP205  | 8   | 4,52  | 17   | 17,00   |
| (B)16hr | SEEL    | Q8TEM1 | Nuclear pore membrane glycoprotein 210                                                                 | NUP210  | 8   | 5,35  | 19   | 19,00   |
| (B)16hr | Control | Q8N1F7 | Nuclear pore complex protein Nup93                                                                     | NUP93   | 15  | 20,51 | 48   | 48,00   |
| (B)16hr | SEEL    | Q8N1F7 | Nuclear pore complex protein Nup93                                                                     | NUP93   | 15  | 22,59 | 33   | 33,00   |
| (B)16hr | Control | Q9UBU9 | Nuclear RNA export factor 1                                                                            | NXF1    | 6   | 10,18 | 15   | 15,00   |
| (B)16hr | SEEL    | Q9UBU9 | Nuclear RNA export factor 1                                                                            | NXF1    | 6   | 10,50 | 13   | 13,00   |
| (B)16hr | SEEL    | B4DF00 | cDNA FLJ53308, highly similar to 2-oxoglutarate dehydrogenase E1 component, mitochondrial (EC 1.2.4.2) | OGDH    | 10  | 10,16 | 24   | 24,00   |
| (B)16hr | Control | Q02218 | 2-oxoglutarate dehydrogenase, mitochondrial                                                            | OGDH    | 17  | 18,87 | 50   | 50,00   |
| (B)16hr | Control | Q02218 | 2-oxoglutarate dehydrogenase, mitochondrial                                                            | OGDH    | 56  | 50,05 | 1137 | 1137,00 |
| (B)16hr | Control | Q02218 | 2-oxoglutarate dehydrogenase, mitochondrial                                                            | OGDH    | 22  | 22,58 | 71   | 71,00   |
| (B)16hr | Control | Q9ULD0 | 2-oxoglutarate dehydrogenase-like, mitochondrial                                                       | OGDHL   | 3   | 2,87  | 5    | 5,00    |
| (B)16hr | Control | P11940 | Polyadenylate-binding protein 1                                                                        | PABPC1  | 10  | 16,19 | 36   | 36,00   |
| (B)16hr | SEEL    | P11940 | Polyadenylate-binding protein 1                                                                        | PABPC1  | 9   | 13,84 | 19   | 19,00   |
| (B)16hr | Control | P11498 | Pyruvate carboxylase, mitochondrial                                                                    | PC      | 36  | 36,33 | 192  | 192,00  |
| (B)16hr | Control | P11498 | Pyruvate carboxylase, mitochondrial                                                                    | PC      | 57  | 51,36 | 735  | 735,00  |
| (B)16hr | Control | P11498 | Pyruvate carboxylase, mitochondrial                                                                    | PC      | 79  | 70,20 | 3419 | 3419,00 |
| (B)16hr | Control | P11498 | Pyruvate carboxylase, mitochondrial                                                                    | PC      | 51  | 48,39 | 367  | 367,00  |
| (B)16hr | SEEL    | P11498 | Pyruvate carboxylase, mitochondrial                                                                    | PC      | 37  | 36,50 | 225  | 225,00  |
| (B)16hr | SEEL    | P11498 | Pyruvate carboxylase, mitochondrial                                                                    | PC      | 61  | 57,81 | 737  | 737,00  |
| (B)16hr | SEEL    | P11498 | Pyruvate carboxylase, mitochondrial                                                                    | PC      | 76  | 72,67 | 2166 | 2166,00 |
| (B)16hr | SEEL    | P11498 | Pyruvate carboxylase, mitochondrial                                                                    | PC      | 42  | 46,69 | 230  | 230,00  |
| (B)16hr | Control | P05165 | Propionyl-CoA carboxylase alpha chain, mitochondrial                                                   | PCCA    | 3   | 4,26  | 7    | 7,00    |
| (B)16hr | Control | P05165 | Propionyl-CoA carboxylase alpha chain, mitochondrial                                                   | PCCA    | 8   | 11,54 | 30   | 30,00   |
| (B)16hr | Control | P05165 | Propionyl-CoA carboxylase alpha chain, mitochondrial                                                   | PCCA    | 53  | 66,90 | 717  | 717,00  |
| (B)16hr | SEEL    | P05165 | Propionyl-CoA carboxylase alpha chain, mitochondrial                                                   | PCCA    | 6   | 9,62  | 13   | 13,00   |
| (B)16hr | SEEL    | P05165 | Propionyl-CoA carboxylase alpha chain, mitochondrial                                                   | PCCA    | 5   | 6,59  | 14   | 14,00   |
| (B)16hr | SEEL    | P05165 | Propionyl-CoA carboxylase alpha chain, mitochondrial                                                   | PCCA    | 47  | 61,81 | 533  | 533,00  |
| (B)16hr | Control | P05166 | Propionyl-CoA carboxylase beta chain, mitochondrial                                                    | PCCB    | 3   | 7,61  | 5    | 5,00    |
| (B)16hr | Control | P05166 | Propionyl-CoA carboxylase beta chain, mitochondrial                                                    | PCCB    | 13  | 29,31 | 31   | 31,00   |
| (B)16hr | SEEL    | O60245 | Protocadherin-7                                                                                        | PCDH7   | 17  | 20,39 | 74   | 74,00   |
| (B)16hr | SEEL    | O60245 | Protocadherin-7                                                                                        | PCDH7   | 16  | 18,71 | 97   | 97,00   |
| (B)16hr | SEEL    | O60245 | Protocadherin-7                                                                                        | PCDH7   | 2   | 2,71  | 6    | 6,00    |
| (B)16hr | Control | Q8WUM4 | Programmed cell death 6-interacting protein                                                            | PDCD6IP | 12  | 17,28 | 29   | 29,00   |
| (B)16hr | SEEL    | Q8WUM4 | Programmed cell death 6-interacting protein                                                            | PDCD6IP | 20  | 25,58 | 56   | 56,00   |
| (B)16hr | Control | P08559 | Pyruvate dehydrogenase E1 component subunit alpha, somatic form, mitochondrial                         | PDHA1   | 5   | 12,05 | 13   | 13,00   |
| (B)16hr | Control | P08559 | Pyruvate dehydrogenase E1 component subunit alpha, somatic form, mitochondrial                         | PDHA1   | 5   | 12,05 | 16   | 16,00   |
| (B)16hr | SEEL    | O00541 | Pescadillo homolog                                                                                     | PES1    | 4   | 6,29  | 8    | 8,00    |
| (B)16hr | Control | P08237 | ATP-dependent 6-phosphofructokinase, muscle type                                                       | PFKM    | 2   | 2,44  | 3    | 3,00    |
| (B)16hr | Control | P08237 | ATP-dependent 6-phosphofructokinase, muscle type                                                       | PFKM    | 5   | 6,28  | 12   | 12,00   |
| (B)16hr | SEEL    | P08237 | ATP-dependent 6-phosphofructokinase, muscle type                                                       | PFKM    | 6   | 6,79  | 15   | 15,00   |
| (B)16hr | Control | Q01813 | ATP-dependent 6-phosphofructokinase, platelet type                                                     | PFKP    | 3   | 3,70  | 5    | 5,00    |
| (B)16hr | SEEL    | M4QHP2 | PIEZO1                                                                                                 | PIEZO1  | 3   | 1,79  | 38   | 38,00   |
| (B)16hr | SEEL    | Q92508 | Piezo-type mechanosensitive ion channel component 1                                                    | PIEZO1  | 4   | 1,82  | 56   | 56,00   |
| (B)16hr | SEEL    | Q92508 | Piezo-type mechanosensitive ion channel component 1                                                    | PIEZO1  | 20  | 10,31 | 55   | 55,00   |
| (B)16hr | SEEL    | Q9H5I5 | Piezo-type mechanosensitive ion channel component 2                                                    | PIEZO2  | 12  | 4,83  | 32   | 32,00   |
| (B)16hr | Control | P14618 | Pyruvate kinase PKM                                                                                    | PKM     | 3   | 6,03  | 5    | 5,00    |
| (B)16hr | Control | P14618 | Pyruvate kinase PKM                                                                                    | PKM     | 29  | 54,24 | 250  | 250,00  |
| (B)16hr | SEEL    | P14618 | Pyruvate kinase PKM                                                                                    | PKM     | 10  | 18,83 | 28   | 28,00   |
| (B)16hr | SEEL    | P14618 | Pyruvate kinase PKM                                                                                    | PKM     | 9   | 22,98 | 22   | 22,00   |
| (B)16hr | SEEL    | P14618 | Pyruvate kinase PKM                                                                                    | PKM     | 11  | 23,92 | 42   | 42,00   |
| (B)16hr | SEEL    | P14618 | Pyruvate kinase PKM                                                                                    | PKM     | 32  | 60,08 | 232  | 232,00  |
| (B)16hr | Control | Q99959 | Plakophilin-2                                                                                          | PKP2    | 3   | 4,88  | 5    | 5,00    |
| (B)16hr | SEEL    | Q99959 | Plakophilin-2                                                                                          | PKP2    | 3   | 4,09  | 5    | 5,00    |
| (B)16hr | Control | Q15149 | Plectin                                                                                                | PLEC    | 198 | 41,01 | 876  | 876,00  |
| (B)16hr | Control | Q15149 | Plectin                                                                                                | PLEC    | 108 | 24,32 | 331  | 331,00  |
| (B)16hr | Control | Q15149 | Plectin                                                                                                | PLEC    | 3   | 0,56  | 3    | 3,00    |
| (B)16hr | SEEL    | Q15149 | Plectin                                                                                                | PLEC    | 137 | 30,72 | 470  | 470,00  |
| (B)16hr | SEEL    | Q15149 | Plectin                                                                                                | PLEC    | 57  | 13,58 | 167  | 167,00  |
| (B)16hr | SEEL    | Q9UIW2 | Plexin-A1                                                                                              | PLXNA1  | 3   | 1,48  | 6    | 6,00    |
| (B)16hr | SEEL    | Q9UIW2 | Plexin-A1                                                                                              | PLXNA1  | 47  | 28,96 | 311  | 311,00  |
| (B)16hr | SEEL    | Q9UIW2 | Plexin-A1                                                                                              | PLXNA1  | 2   | 1,05  | 6    | 6,00    |
| (B)16hr | SEEL    | O75051 | Plexin-A2                                                                                              | PLXNA2  | 3   | 1,58  | 8    | 8,00    |
| (B)16hr | SEEL    | O43157 | Plexin-B1                                                                                              | PLXNB1  | 6   | 4,31  | 30   | 30,00   |
| (B)16hr | SEEL    | O43157 | Plexin-B1                                                                                              | PLXNB1  | 19  | 10,54 | 80   | 80,00   |
| (B)16hr | SEEL    | O43157 | Plexin-B1                                                                                              | PLXNB1  | 5   | 2,67  | 19   | 19,00   |

|         |         |        |                                                         |         |    |       |     |        |
|---------|---------|--------|---------------------------------------------------------|---------|----|-------|-----|--------|
| (B)16hr | SEEL    | O15031 | Plexin-B2                                               | PLXNB2  | 3  | 3,48  | 6   | 6,00   |
| (B)16hr | SEEL    | O15031 | Plexin-B2                                               | PLXNB2  | 27 | 17,79 | 220 | 220,00 |
| (B)16hr | SEEL    | O15031 | Plexin-B2                                               | PLXNB2  | 17 | 10,07 | 51  | 51,00  |
| (B)16hr | SEEL    | O15031 | Plexin-B2                                               | PLXNB2  | 39 | 21,00 | 400 | 400,00 |
| (B)16hr | SEEL    | Q9Y4D7 | Plexin-D1                                               | PLXND1  | 23 | 14,81 | 117 | 117,00 |
| (B)16hr | SEEL    | O00592 | Podocalyxin                                             | PODXL   | 7  | 12,90 | 41  | 41,00  |
| (B)16hr | SEEL    | O00592 | Podocalyxin                                             | PODXL   | 13 | 22,94 | 248 | 248,00 |
| (B)16hr | SEEL    | O00592 | Podocalyxin                                             | PODXL   | 7  | 12,54 | 27  | 27,00  |
| (B)16hr | SEEL    | O00592 | Podocalyxin                                             | PODXL   | 6  | 11,29 | 41  | 41,00  |
| (B)16hr | Control | P78527 | DNA-dependent protein kinase catalytic subunit          | PRKDC   | 49 | 12,02 | 122 | 122,00 |
| (B)16hr | Control | P78527 | DNA-dependent protein kinase catalytic subunit          | PRKDC   | 6  | 1,45  | 14  | 14,00  |
| (B)16hr | SEEL    | P78527 | DNA-dependent protein kinase catalytic subunit          | PRKDC   | 84 | 20,30 | 303 | 303,00 |
| (B)16hr | SEEL    | P78527 | DNA-dependent protein kinase catalytic subunit          | PRKDC   | 15 | 3,90  | 34  | 34,00  |
| (B)16hr | Control | Q13523 | Serine/threonine-protein kinase PRP4 homolog            | PRPF4B  | 9  | 8,44  | 21  | 21,00  |
| (B)16hr | Control | Q13523 | Serine/threonine-protein kinase PRP4 homolog            | PRPF4B  | 19 | 19,07 | 63  | 63,00  |
| (B)16hr | Control | Q13523 | Serine/threonine-protein kinase PRP4 homolog            | PRPF4B  | 5  | 5,76  | 10  | 10,00  |
| (B)16hr | Control | Q13523 | Serine/threonine-protein kinase PRP4 homolog            | PRPF4B  | 8  | 8,54  | 16  | 16,00  |
| (B)16hr | SEEL    | Q13523 | Serine/threonine-protein kinase PRP4 homolog            | PRPF4B  | 6  | 5,66  | 11  | 11,00  |
| (B)16hr | SEEL    | Q13523 | Serine/threonine-protein kinase PRP4 homolog            | PRPF4B  | 12 | 12,81 | 45  | 45,00  |
| (B)16hr | Control | O94906 | Pre-mRNA-processing factor 6                            | PRPF6   | 5  | 5,95  | 8   | 8,00   |
| (B)16hr | SEEL    | O94906 | Pre-mRNA-processing factor 6                            | PRPF6   | 5  | 6,16  | 7   | 7,00   |
| (B)16hr | Control | Q6P2Q9 | Pre-mRNA-processing-splicing factor 8                   | PRPF8   | 4  | 1,58  | 7   | 7,00   |
| (B)16hr | SEEL    | Q6P2Q9 | Pre-mRNA-processing-splicing factor 8                   | PRPF8   | 4  | 1,50  | 7   | 7,00   |
| (B)16hr | SEEL    | P0CW18 | Serine protease 56                                      | PRSS56  | 7  | 11,94 | 19  | 19,00  |
| (B)16hr | Control | Q13200 | 26S proteasome non-ATPase regulatory subunit 2          | PSMD2   | 15 | 19,71 | 44  | 44,00  |
| (B)16hr | SEEL    | Q13200 | 26S proteasome non-ATPase regulatory subunit 2          | PSMD2   | 15 | 20,70 | 49  | 49,00  |
| (B)16hr | Control | O43242 | 26S proteasome non-ATPase regulatory subunit 3          | PSMD3   | 21 | 41,20 | 69  | 69,00  |
| (B)16hr | SEEL    | O43242 | 26S proteasome non-ATPase regulatory subunit 3          | PSMD3   | 20 | 37,45 | 79  | 79,00  |
| (B)16hr | Control | P26599 | Polypyrimidine tract-binding protein 1                  | PTBP1   | 3  | 5,08  | 6   | 6,00   |
| (B)16hr | SEEL    | Q9P2B2 | Prostaglandin F2 receptor negative regulator            | PTGFRN  | 4  | 3,53  | 32  | 32,00  |
| (B)16hr | SEEL    | Q9P2B2 | Prostaglandin F2 receptor negative regulator            | PTGFRN  | 5  | 4,55  | 54  | 54,00  |
| (B)16hr | SEEL    | Q9P2B2 | Prostaglandin F2 receptor negative regulator            | PTGFRN  | 6  | 6,14  | 17  | 17,00  |
| (B)16hr | SEEL    | Q13308 | Inactive tyrosine-protein kinase 7                      | PTK7    | 9  | 9,72  | 22  | 22,00  |
| (B)16hr | SEEL    | Q9P035 | Very-long-chain (3R)-3-hydroxyacyl-CoA dehydratase 3    | PTPLAD1 | 3  | 11,88 | 4   | 4,00   |
| (B)16hr | SEEL    | Q9P035 | Very-long-chain (3R)-3-hydroxyacyl-CoA dehydratase 3    | PTPLAD1 | 2  | 9,67  | 4   | 4,00   |
| (B)16hr | SEEL    | P18433 | Receptor-type tyrosine-protein phosphatase alpha        | PTPRA   | 32 | 41,15 | 166 | 166,00 |
| (B)16hr | Control | P10586 | Receptor-type tyrosine-protein phosphatase F            | PTPRF   | 16 | 11,43 | 52  | 52,00  |
| (B)16hr | SEEL    | P10586 | Receptor-type tyrosine-protein phosphatase F            | PTPRF   | 50 | 32,93 | 477 | 477,00 |
| (B)16hr | SEEL    | P10586 | Receptor-type tyrosine-protein phosphatase F            | PTPRF   | 6  | 3,88  | 26  | 26,00  |
| (B)16hr | SEEL    | P10586 | Receptor-type tyrosine-protein phosphatase F            | PTPRF   | 24 | 16,15 | 136 | 136,00 |
| (B)16hr | SEEL    | P23470 | Receptor-type tyrosine-protein phosphatase gamma        | PTPRG   | 25 | 21,04 | 110 | 110,00 |
| (B)16hr | SEEL    | P23470 | Receptor-type tyrosine-protein phosphatase gamma        | PTPRG   | 3  | 2,01  | 6   | 6,00   |
| (B)16hr | SEEL    | Q12913 | Receptor-type tyrosine-protein phosphatase eta          | PTPRJ   | 6  | 6,73  | 10  | 10,00  |
| (B)16hr | SEEL    | Q12913 | Receptor-type tyrosine-protein phosphatase eta          | PTPRJ   | 26 | 23,19 | 152 | 152,00 |
| (B)16hr | SEEL    | E9PGC5 | Receptor-type tyrosine-protein phosphatase kappa        | PTPRK   | 12 | 9,71  | 32  | 32,00  |
| (B)16hr | SEEL    | A8E4L7 | PTPRS protein (Fragment)                                | PTPRS   | 2  | 11,46 | 4   | 4,00   |
| (B)16hr | Control | Q13332 | Receptor-type tyrosine-protein phosphatase S            | PTPRS   | 8  | 5,54  | 21  | 21,00  |
| (B)16hr | SEEL    | Q13332 | Receptor-type tyrosine-protein phosphatase S            | PTPRS   | 12 | 9,65  | 74  | 74,00  |
| (B)16hr | SEEL    | Q13332 | Receptor-type tyrosine-protein phosphatase S            | PTPRS   | 8  | 6,57  | 17  | 17,00  |
| (B)16hr | Control | Q9UHX1 | Poly(U)-binding-splicing factor PUF60                   | PUF60   | 13 | 29,52 | 56  | 56,00  |
| (B)16hr | SEEL    | Q9UHX1 | Poly(U)-binding-splicing factor PUF60                   | PUF60   | 7  | 15,56 | 15  | 15,00  |
| (B)16hr | SEEL    | A8K4I1 | cDNA FLJ75404                                           | PVR     | 10 | 24,70 | 281 | 281,00 |
| (B)16hr | SEEL    | P15151 | Poliovirus receptor                                     | PVR     | 4  | 10,31 | 11  | 11,00  |
| (B)16hr | SEEL    | P15151 | Poliovirus receptor                                     | PVR     | 7  | 15,11 | 20  | 20,00  |
| (B)16hr | SEEL    | Q92692 | Nectin-2                                                | PVRL2   | 3  | 4,83  | 9   | 9,00   |
| (B)16hr | SEEL    | Q92692 | Nectin-2                                                | PVRL2   | 3  | 6,69  | 17  | 17,00  |
| (B)16hr | SEEL    | Q9UEI6 | Polio virus related protein 2, alpha isoform (Fragment) | PVRL2   | 2  | 4,45  | 16  | 16,00  |
| (B)16hr | SEEL    | Q9NQS3 | Nectin-3                                                | PVRL3   | 5  | 14,94 | 8   | 8,00   |
| (B)16hr | Control | P47897 | Glutamine--tRNA ligase                                  | QARS    | 8  | 11,74 | 17  | 17,00  |
| (B)16hr | SEEL    | P47897 | Glutamine--tRNA ligase                                  | QARS    | 10 | 14,58 | 20  | 20,00  |
| (B)16hr | Control | P62826 | GTP-binding nuclear protein Ran                         | RAN     | 4  | 19,44 | 12  | 12,00  |
| (B)16hr | Control | P62826 | GTP-binding nuclear protein Ran                         | RAN     | 3  | 15,74 | 4   | 4,00   |
| (B)16hr | SEEL    | P62826 | GTP-binding nuclear protein Ran                         | RAN     | 5  | 19,91 | 22  | 22,00  |
| (B)16hr | SEEL    | P62826 | GTP-binding nuclear protein Ran                         | RAN     | 5  | 19,91 | 20  | 20,00  |
| (B)16hr | SEEL    | P62826 | GTP-binding nuclear protein Ran                         | RAN     | 4  | 18,98 | 10  | 10,00  |
| (B)16hr | SEEL    | P62826 | GTP-binding nuclear protein Ran                         | RAN     | 4  | 20,83 | 8   | 8,00   |

|         |         |            |                                                                          |         |    |       |     |        |
|---------|---------|------------|--------------------------------------------------------------------------|---------|----|-------|-----|--------|
| (B)16hr | SEEL    | P49792     | E3 SUMO-protein ligase RanBP2                                            | RANBP2  | 2  | 0,78  | 3   | 3,00   |
| (B)16hr | Control | P54136     | Arginine-tRNA ligase, cytoplasmic                                        | RARS    | 9  | 14,24 | 21  | 21,00  |
| (B)16hr | SEEL    | P54136     | Arginine-tRNA ligase, cytoplasmic                                        | RARS    | 11 | 16,97 | 35  | 35,00  |
| (B)16hr | Control | Q7Z6E9     | E3 ubiquitin-protein ligase RBBP6                                        | RBBP6   | 6  | 3,35  | 12  | 12,00  |
| (B)16hr | Control | Q96PK6     | RNA-binding protein 14                                                   | RBM14   | 20 | 30,19 | 77  | 77,00  |
| (B)16hr | SEEL    | Q96PK6     | RNA-binding protein 14                                                   | RBM14   | 17 | 27,80 | 70  | 70,00  |
| (B)16hr | SEEL    | Q96T37     | Putative RNA-binding protein 15                                          | RBM15   | 2  | 2,97  | 3   | 3,00   |
| (B)16hr | Control | P49756     | RNA-binding protein 25                                                   | RBM25   | 4  | 6,64  | 10  | 10,00  |
| (B)16hr | Control | Q14498     | RNA-binding protein 39                                                   | RBM39   | 3  | 5,85  | 6   | 6,00   |
| (B)16hr | SEEL    | Q7Z3J3     | RanBP2-like and GRIP domain-containing protein 4                         | RGPD4   | 3  | 2,05  | 4   | 4,00   |
| (B)16hr | SEEL    | Q9Y6N7     | Roundabout homolog 1                                                     | ROBO1   | 12 | 8,30  | 27  | 27,00  |
| (B)16hr | SEEL    | Q9Y6N7     | Roundabout homolog 1                                                     | ROBO1   | 42 | 28,95 | 421 | 421,00 |
| (B)16hr | SEEL    | Q9Y6N7     | Roundabout homolog 1                                                     | ROBO1   | 34 | 24,41 | 179 | 179,00 |
| (B)16hr | SEEL    | Q01974     | Tyrosine-protein kinase transmembrane receptor ROR2                      | ROR2    | 4  | 4,77  | 8   | 8,00   |
| (B)16hr | SEEL    | Q01974     | Tyrosine-protein kinase transmembrane receptor ROR2                      | ROR2    | 20 | 20,25 | 128 | 128,00 |
| (B)16hr | SEEL    | Q01974     | Tyrosine-protein kinase transmembrane receptor ROR2                      | ROR2    | 3  | 3,71  | 7   | 7,00   |
| (B)16hr | Control | P27694     | Replication protein A 70 kDa DNA-binding subunit                         | RPA1    | 6  | 11,20 | 15  | 15,00  |
| (B)16hr | SEEL    | P27694     | Replication protein A 70 kDa DNA-binding subunit                         | RPA1    | 2  | 3,73  | 3   | 3,00   |
| (B)16hr | SEEL    | P40429     | 60S ribosomal protein L13a                                               | RPL13A  | 4  | 16,26 | 7   | 7,00   |
| (B)16hr | SEEL    | P61313     | 60S ribosomal protein L15                                                | RPL15   | 4  | 18,14 | 17  | 17,00  |
| (B)16hr | SEEL    | Q02543     | 60S ribosomal protein L18a                                               | RPL18A  | 2  | 13,07 | 8   | 8,00   |
| (B)16hr | SEEL    | Q02543     | 60S ribosomal protein L18a                                               | RPL18A  | 2  | 13,07 | 7   | 7,00   |
| (B)16hr | SEEL    | P62829     | 60S ribosomal protein L23                                                | RPL23   | 2  | 21,43 | 4   | 4,00   |
| (B)16hr | SEEL    | P46779     | 60S ribosomal protein L28                                                | RPL28   | 3  | 21,90 | 7   | 7,00   |
| (B)16hr | SEEL    | P46779     | 60S ribosomal protein L28                                                | RPL28   | 4  | 27,74 | 8   | 8,00   |
| (B)16hr | SEEL    | P39023     | 60S ribosomal protein L3                                                 | RPL3    | 2  | 5,96  | 5   | 5,00   |
| (B)16hr | Control | P04843     | Dolichyl-diphosphooligosaccharide--protein glycosyltransferase subunit 1 | RPN1    | 18 | 29,16 | 52  | 52,00  |
| (B)16hr | SEEL    | P04843     | Dolichyl-diphosphooligosaccharide--protein glycosyltransferase subunit 1 | RPN1    | 13 | 23,23 | 29  | 29,00  |
| (B)16hr | Control | P04844     | Dolichyl-diphosphooligosaccharide--protein glycosyltransferase subunit 2 | RPN2    | 10 | 21,87 | 47  | 47,00  |
| (B)16hr | SEEL    | P04844     | Dolichyl-diphosphooligosaccharide--protein glycosyltransferase subunit 2 | RPN2    | 12 | 27,26 | 51  | 51,00  |
| (B)16hr | SEEL    | P62280     | 40S ribosomal protein S11                                                | RPS11   | 5  | 24,05 | 18  | 18,00  |
| (B)16hr | SEEL    | P62280     | 40S ribosomal protein S11                                                | RPS11   | 5  | 27,85 | 16  | 16,00  |
| (B)16hr | SEEL    | P62263     | 40S ribosomal protein S14                                                | RPS14   | 2  | 15,89 | 4   | 4,00   |
| (B)16hr | SEEL    | P15880     | 40S ribosomal protein S2                                                 | RPS2    | 3  | 10,58 | 8   | 8,00   |
| (B)16hr | SEEL    | P15880     | 40S ribosomal protein S2                                                 | RPS2    | 7  | 23,89 | 24  | 24,00  |
| (B)16hr | SEEL    | P15880     | 40S ribosomal protein S2                                                 | RPS2    | 3  | 10,92 | 8   | 8,00   |
| (B)16hr | SEEL    | P15880     | 40S ribosomal protein S2                                                 | RPS2    | 6  | 20,14 | 25  | 25,00  |
| (B)16hr | SEEL    | P62266     | 40S ribosomal protein S23                                                | RPS23   | 4  | 29,37 | 16  | 16,00  |
| (B)16hr | SEEL    | P62266     | 40S ribosomal protein S23                                                | RPS23   | 4  | 29,37 | 11  | 11,00  |
| (B)16hr | SEEL    | P42677     | 40S ribosomal protein S27                                                | RPS27   | 2  | 25,00 | 5   | 5,00   |
| (B)16hr | SEEL    | P23396     | 40S ribosomal protein S3                                                 | RPS3    | 9  | 35,80 | 22  | 22,00  |
| (B)16hr | SEEL    | P23396     | 40S ribosomal protein S3                                                 | RPS3    | 10 | 37,45 | 32  | 32,00  |
| (B)16hr | SEEL    | P23396     | 40S ribosomal protein S3                                                 | RPS3    | 8  | 31,69 | 15  | 15,00  |
| (B)16hr | SEEL    | P23396     | 40S ribosomal protein S3                                                 | RPS3    | 8  | 28,40 | 21  | 21,00  |
| (B)16hr | SEEL    | P62753     | 40S ribosomal protein S6                                                 | RPS6    | 3  | 12,85 | 12  | 12,00  |
| (B)16hr | SEEL    | P62753     | 40S ribosomal protein S6                                                 | RPS6    | 4  | 17,27 | 14  | 14,00  |
| (B)16hr | SEEL    | P46781     | 40S ribosomal protein S9                                                 | RPS9    | 7  | 35,05 | 25  | 25,00  |
| (B)16hr | SEEL    | P46781     | 40S ribosomal protein S9                                                 | RPS9    | 4  | 17,53 | 12  | 12,00  |
| (B)16hr | Control | P23921     | Ribonucleoside-diphosphate reductase large subunit                       | RRM1    | 12 | 14,39 | 56  | 56,00  |
| (B)16hr | SEEL    | P23921     | Ribonucleoside-diphosphate reductase large subunit                       | RRM1    | 11 | 14,77 | 37  | 37,00  |
| (B)16hr | Control | Q5VWQ0     | Round spermatid basic protein 1                                          | RSBN1   | 2  | 3,24  | 7   | 7,00   |
| (B)16hr | Control | Q6PCB5     | Round spermatid basic protein 1-like protein                             | RSBN1L  | 5  | 6,26  | 12  | 12,00  |
| (B)16hr | SEEL    | Q9Y3I0     | tRNA-splicing ligase RtcB homolog                                        | RTCB    | 3  | 4,36  | 4   | 4,00   |
| (B)16hr | SEEL    | Q9NQC3     | Reticulon-4                                                              | RTN4    | 2  | 2,27  | 5   | 5,00   |
| (B)16hr | SEEL    | Q86UN3     | Reticulon-4 receptor-like 2                                              | RTN4RL2 | 8  | 18,33 | 32  | 32,00  |
| (B)16hr | SEEL    | O14828     | Secretory carrier-associated membrane protein 3                          | SCAMP3  | 2  | 8,36  | 4   | 4,00   |
| (B)16hr | SEEL    | O14828     | Secretory carrier-associated membrane protein 3                          | SCAMP3  | 2  | 8,36  | 4   | 4,00   |
| (B)16hr | SEEL    | A0A024RBS4 | Scavenger receptor class B, member 1, isoform CRA_b                      | SCARB1  | 10 | 15,72 | 89  | 89,00  |
| (B)16hr | SEEL    | Q8WTV0     | Scavenger receptor class B member 1                                      | SCARB1  | 3  | 5,43  | 12  | 12,00  |
| (B)16hr | Control | Q9Y6U3     | Adseverin                                                                | SCIN    | 10 | 15,24 | 33  | 33,00  |
| (B)16hr | Control | Q9Y6U3     | Adseverin                                                                | SCIN    | 22 | 33,85 | 105 | 105,00 |
| (B)16hr | SEEL    | Q9Y6U3     | Adseverin                                                                | SCIN    | 5  | 7,97  | 12  | 12,00  |
| (B)16hr | SEEL    | Q9NY46     | Sodium channel protein type 3 subunit alpha                              | SCN3A   | 2  | 1,40  | 16  | 16,00  |
| (B)16hr | Control | P31040     | Succinate dehydrogenase [ubiquinone] flavoprotein subunit, mitochondrial | SDHA    | 8  | 12,50 | 22  | 22,00  |
| (B)16hr | SEEL    | P31040     | Succinate dehydrogenase [ubiquinone] flavoprotein subunit, mitochondrial | SDHA    | 3  | 5,27  | 7   | 7,00   |
| (B)16hr | Control | B4DF60     | cDNA FLJ55960, highly similar to Protein transport protein Sec23A        | SEC23A  | 5  | 7,69  | 13  | 13,00  |



|         |         |        |                                                                    |          |    |       |     |        |
|---------|---------|--------|--------------------------------------------------------------------|----------|----|-------|-----|--------|
| (B)16hr | SEEL    | B4DF60 | cDNA FLJ55960, highly similar to Protein transport protein Sec23A  | SEC23A   | 2  | 3,02  | 6   | 6,00   |
| (B)16hr | Control | P53992 | Protein transport protein Sec24C                                   | SEC24C   | 7  | 7,13  | 19  | 19,00  |
| (B)16hr | SEEL    | P53992 | Protein transport protein Sec24C                                   | SEC24C   | 4  | 3,66  | 6   | 6,00   |
| (B)16hr | Control | P23246 | Splicing factor, proline- and glutamine-rich                       | SFPQ     | 8  | 13,44 | 41  | 41,00  |
| (B)16hr | SEEL    | P23246 | Splicing factor, proline- and glutamine-rich                       | SFPQ     | 7  | 11,88 | 20  | 20,00  |
| (B)16hr | SEEL    | P78324 | Tyrosine-protein phosphatase non-receptor type substrate 1         | SIRPA    | 5  | 15,67 | 9   | 9,00   |
| (B)16hr | SEEL    | P55011 | Solute carrier family 12 member 2                                  | SLC12A2  | 10 | 9,98  | 25  | 25,00  |
| (B)16hr | SEEL    | P55011 | Solute carrier family 12 member 2                                  | SLC12A2  | 17 | 19,64 | 74  | 74,00  |
| (B)16hr | SEEL    | Q9Y666 | Solute carrier family 12 member 7                                  | SLC12A7  | 16 | 15,70 | 73  | 73,00  |
| (B)16hr | SEEL    | Q9Y666 | Solute carrier family 12 member 7                                  | SLC12A7  | 28 | 27,24 | 260 | 260,00 |
| (B)16hr | SEEL    | Q9Y666 | Solute carrier family 12 member 7                                  | SLC12A7  | 16 | 16,81 | 67  | 67,00  |
| (B)16hr | Control | B4E106 | cDNA FLJ53399, highly similar to Monocarboxylate transporter 1     | SLC16A1  | 3  | 11,04 | 12  | 12,00  |
| (B)16hr | SEEL    | B4E106 | cDNA FLJ53399, highly similar to Monocarboxylate transporter 1     | SLC16A1  | 3  | 11,04 | 14  | 14,00  |
| (B)16hr | SEEL    | B4E106 | cDNA FLJ53399, highly similar to Monocarboxylate transporter 1     | SLC16A1  | 4  | 11,04 | 28  | 28,00  |
| (B)16hr | SEEL    | B4E106 | cDNA FLJ53399, highly similar to Monocarboxylate transporter 1     | SLC16A1  | 5  | 11,25 | 24  | 24,00  |
| (B)16hr | SEEL    | B4E106 | cDNA FLJ53399, highly similar to Monocarboxylate transporter 1     | SLC16A1  | 3  | 8,54  | 16  | 16,00  |
| (B)16hr | SEEL    | O15427 | Monocarboxylate transporter 4                                      | SLC16A3  | 3  | 7,31  | 14  | 14,00  |
| (B)16hr | SEEL    | O15427 | Monocarboxylate transporter 4                                      | SLC16A3  | 4  | 8,82  | 23  | 23,00  |
| (B)16hr | SEEL    | O15427 | Monocarboxylate transporter 4                                      | SLC16A3  | 5  | 10,54 | 16  | 16,00  |
| (B)16hr | SEEL    | O15427 | Monocarboxylate transporter 4                                      | SLC16A3  | 3  | 7,31  | 15  | 15,00  |
| (B)16hr | SEEL    | P41440 | Folate transporter 1                                               | SLC19A1  | 3  | 5,58  | 9   | 9,00   |
| (B)16hr | SEEL    | P43007 | Neutral amino acid transporter A                                   | SLC1A4   | 5  | 12,22 | 10  | 10,00  |
| (B)16hr | Control | Q15758 | Neutral amino acid transporter B(0)                                | SLC1A5   | 6  | 11,46 | 19  | 19,00  |
| (B)16hr | SEEL    | Q15758 | Neutral amino acid transporter B(0)                                | SLC1A5   | 5  | 11,65 | 12  | 12,00  |
| (B)16hr | SEEL    | Q15758 | Neutral amino acid transporter B(0)                                | SLC1A5   | 9  | 21,81 | 40  | 40,00  |
| (B)16hr | SEEL    | Q15758 | Neutral amino acid transporter B(0)                                | SLC1A5   | 9  | 21,81 | 50  | 50,00  |
| (B)16hr | SEEL    | Q15758 | Neutral amino acid transporter B(0)                                | SLC1A5   | 14 | 28,10 | 112 | 112,00 |
| (B)16hr | Control | O75746 | Calcium-binding mitochondrial carrier protein Aralar1              | SLC25A12 | 3  | 4,13  | 5   | 5,00   |
| (B)16hr | SEEL    | O75746 | Calcium-binding mitochondrial carrier protein Aralar1              | SLC25A12 | 2  | 3,39  | 2   | 2,00   |
| (B)16hr | Control | Q9UJ50 | Calcium-binding mitochondrial carrier protein Aralar2              | SLC25A13 | 15 | 27,26 | 44  | 44,00  |
| (B)16hr | SEEL    | Q9UJ50 | Calcium-binding mitochondrial carrier protein Aralar2              | SLC25A13 | 13 | 24,44 | 40  | 40,00  |
| (B)16hr | SEEL    | Q00325 | Phosphate carrier protein, mitochondrial                           | SLC25A3  | 3  | 6,91  | 22  | 22,00  |
| (B)16hr | SEEL    | Q00325 | Phosphate carrier protein, mitochondrial                           | SLC25A3  | 7  | 16,30 | 41  | 41,00  |
| (B)16hr | SEEL    | Q00325 | Phosphate carrier protein, mitochondrial                           | SLC25A3  | 4  | 8,84  | 16  | 16,00  |
| (B)16hr | SEEL    | Q00325 | Phosphate carrier protein, mitochondrial                           | SLC25A3  | 4  | 8,84  | 12  | 12,00  |
| (B)16hr | Control | P05141 | ADP/ATP translocase 2                                              | SLC25A5  | 2  | 8,05  | 8   | 8,00   |
| (B)16hr | Control | P05141 | ADP/ATP translocase 2                                              | SLC25A5  | 7  | 22,15 | 13  | 13,00  |
| (B)16hr | SEEL    | P05141 | ADP/ATP translocase 2                                              | SLC25A5  | 3  | 11,41 | 17  | 17,00  |
| (B)16hr | SEEL    | P05141 | ADP/ATP translocase 2                                              | SLC25A5  | 3  | 11,41 | 15  | 15,00  |
| (B)16hr | SEEL    | P05141 | ADP/ATP translocase 2                                              | SLC25A5  | 3  | 11,41 | 10  | 10,00  |
| (B)16hr | SEEL    | P05141 | ADP/ATP translocase 2                                              | SLC25A5  | 3  | 11,41 | 12  | 12,00  |
| (B)16hr | Control | P12236 | ADP/ATP translocase 3                                              | SLC25A6  | 2  | 8,05  | 9   | 9,00   |
| (B)16hr | SEEL    | P12236 | ADP/ATP translocase 3                                              | SLC25A6  | 2  | 8,05  | 12  | 12,00  |
| (B)16hr | SEEL    | P12236 | ADP/ATP translocase 3                                              | SLC25A6  | 3  | 10,74 | 13  | 13,00  |
| (B)16hr | SEEL    | Q99808 | Equilibrative nucleoside transporter 1                             | SLC29A1  | 5  | 10,75 | 17  | 17,00  |
| (B)16hr | SEEL    | P11166 | Solute carrier family 2, facilitated glucose transporter member 1  | SLC2A1   | 3  | 10,37 | 15  | 15,00  |
| (B)16hr | SEEL    | P11166 | Solute carrier family 2, facilitated glucose transporter member 1  | SLC2A1   | 4  | 11,99 | 26  | 26,00  |
| (B)16hr | SEEL    | P11166 | Solute carrier family 2, facilitated glucose transporter member 1  | SLC2A1   | 4  | 11,99 | 20  | 20,00  |
| (B)16hr | SEEL    | P11166 | Solute carrier family 2, facilitated glucose transporter member 1  | SLC2A1   | 4  | 8,74  | 18  | 18,00  |
| (B)16hr | SEEL    | Q8TDB8 | Solute carrier family 2, facilitated glucose transporter member 14 | SLC2A14  | 5  | 13,27 | 21  | 21,00  |
| (B)16hr | SEEL    | P11169 | Solute carrier family 2, facilitated glucose transporter member 3  | SLC2A3   | 3  | 5,44  | 14  | 14,00  |
| (B)16hr | SEEL    | P11169 | Solute carrier family 2, facilitated glucose transporter member 3  | SLC2A3   | 4  | 9,48  | 20  | 20,00  |
| (B)16hr | SEEL    | P11169 | Solute carrier family 2, facilitated glucose transporter member 3  | SLC2A3   | 3  | 5,44  | 13  | 13,00  |
| (B)16hr | SEEL    | Q9Y6M5 | Zinc transporter 1                                                 | SLC30A1  | 3  | 6,51  | 10  | 10,00  |
| (B)16hr | SEEL    | Q9Y6M5 | Zinc transporter 1                                                 | SLC30A1  | 15 | 33,14 | 73  | 73,00  |
| (B)16hr | SEEL    | Q9Y6M5 | Zinc transporter 1                                                 | SLC30A1  | 6  | 13,61 | 23  | 23,00  |
| (B)16hr | SEEL    | Q9Y6M5 | Zinc transporter 1                                                 | SLC30A1  | 9  | 22,29 | 53  | 53,00  |
| (B)16hr | SEEL    | Q9H2H9 | Sodium-coupled neutral amino acid transporter 1                    | SLC38A1  | 2  | 3,90  | 6   | 6,00   |
| (B)16hr | SEEL    | Q9H2H9 | Sodium-coupled neutral amino acid transporter 1                    | SLC38A1  | 6  | 9,03  | 36  | 36,00  |
| (B)16hr | SEEL    | Q9H2H9 | Sodium-coupled neutral amino acid transporter 1                    | SLC38A1  | 7  | 10,88 | 31  | 31,00  |
| (B)16hr | SEEL    | Q9H2H9 | Sodium-coupled neutral amino acid transporter 1                    | SLC38A1  | 4  | 7,19  | 14  | 14,00  |
| (B)16hr | SEEL    | Q96QD8 | Sodium-coupled neutral amino acid transporter 2                    | SLC38A2  | 4  | 10,87 | 14  | 14,00  |
| (B)16hr | SEEL    | Q96QD8 | Sodium-coupled neutral amino acid transporter 2                    | SLC38A2  | 4  | 10,87 | 9   | 9,00   |
| (B)16hr | SEEL    | Q9ULF5 | Zinc transporter ZIP10                                             | SLC39A10 | 5  | 4,33  | 40  | 40,00  |
| (B)16hr | SEEL    | Q15043 | Zinc transporter ZIP14                                             | SLC39A14 | 3  | 6,91  | 13  | 13,00  |
| (B)16hr | SEEL    | Q15043 | Zinc transporter ZIP14                                             | SLC39A14 | 4  | 10,98 | 36  | 36,00  |

|         |         |            |                                                                   |          |    |       |      |         |
|---------|---------|------------|-------------------------------------------------------------------|----------|----|-------|------|---------|
| (B)16hr | SEEL    | Q15043     | Zinc transporter ZIP14                                            | SLC39A14 | 4  | 10,98 | 19   | 19,00   |
| (B)16hr | SEEL    | Q15043     | Zinc transporter ZIP14                                            | SLC39A14 | 2  | 5,08  | 7    | 7,00    |
| (B)16hr | SEEL    | Q13433     | Zinc transporter ZIP6                                             | SLC39A6  | 3  | 5,83  | 7    | 7,00    |
| (B)16hr | SEEL    | Q13433     | Zinc transporter ZIP6                                             | SLC39A6  | 3  | 5,83  | 8    | 8,00    |
| (B)16hr | SEEL    | Q13433     | Zinc transporter ZIP6                                             | SLC39A6  | 5  | 5,83  | 17   | 17,00   |
| (B)16hr | SEEL    | F5GZ56     | 4F2 cell-surface antigen heavy chain                              | SLC3A2   | 38 | 53,42 | 1358 | 1358,00 |
| (B)16hr | Control | P08195     | 4F2 cell-surface antigen heavy chain                              | SLC3A2   | 6  | 13,17 | 16   | 16,00   |
| (B)16hr | Control | P08195     | 4F2 cell-surface antigen heavy chain                              | SLC3A2   | 21 | 32,86 | 99   | 99,00   |
| (B)16hr | Control | P08195     | 4F2 cell-surface antigen heavy chain                              | SLC3A2   | 21 | 30,48 | 103  | 103,00  |
| (B)16hr | Control | P08195     | 4F2 cell-surface antigen heavy chain                              | SLC3A2   | 19 | 32,54 | 82   | 82,00   |
| (B)16hr | SEEL    | P08195     | 4F2 cell-surface antigen heavy chain                              | SLC3A2   | 25 | 37,78 | 260  | 260,00  |
| (B)16hr | SEEL    | P08195     | 4F2 cell-surface antigen heavy chain                              | SLC3A2   | 24 | 33,49 | 485  | 485,00  |
| (B)16hr | SEEL    | P08195     | 4F2 cell-surface antigen heavy chain                              | SLC3A2   | 33 | 40,16 | 1168 | 1168,00 |
| (B)16hr | SEEL    | A0A024R798 | Solute carrier family 44, member 2, isoform CRA_b                 | SLC44A2  | 11 | 14,06 | 49   | 49,00   |
| (B)16hr | SEEL    | P04920     | Anion exchange protein 2                                          | SLC4A2   | 24 | 24,82 | 125  | 125,00  |
| (B)16hr | SEEL    | P04920     | Anion exchange protein 2                                          | SLC4A2   | 11 | 10,31 | 30   | 30,00   |
| (B)16hr | SEEL    | B5M450     | Solute carrier family 4 sodium bicarbonate cotransporter member 7 | SLC4A7   | 2  | 1,65  | 8    | 8,00    |
| (B)16hr | SEEL    | B5M450     | Solute carrier family 4 sodium bicarbonate cotransporter member 7 | SLC4A7   | 9  | 8,10  | 33   | 33,00   |
| (B)16hr | SEEL    | P31641     | Sodium- and chloride-dependent taurine transporter                | SLC6A6   | 4  | 6,77  | 15   | 15,00   |
| (B)16hr | SEEL    | P31641     | Sodium- and chloride-dependent taurine transporter                | SLC6A6   | 7  | 11,94 | 25   | 25,00   |
| (B)16hr | SEEL    | P48067     | Sodium- and chloride-dependent glycine transporter 1              | SLC6A9   | 5  | 8,78  | 15   | 15,00   |
| (B)16hr | SEEL    | P30825     | High affinity cationic amino acid transporter 1                   | SLC7A1   | 2  | 2,54  | 6    | 6,00    |
| (B)16hr | SEEL    | Q9UPY5     | Cystine/glutamate transporter                                     | SLC7A11  | 3  | 6,79  | 13   | 13,00   |
| (B)16hr | SEEL    | Q9UPY5     | Cystine/glutamate transporter                                     | SLC7A11  | 4  | 8,18  | 22   | 22,00   |
| (B)16hr | SEEL    | Q9UPY5     | Cystine/glutamate transporter                                     | SLC7A11  | 4  | 8,18  | 17   | 17,00   |
| (B)16hr | Control | Q01650     | Large neutral amino acids transporter small subunit 1             | SLC7A5   | 7  | 14,79 | 42   | 42,00   |
| (B)16hr | Control | Q01650     | Large neutral amino acids transporter small subunit 1             | SLC7A5   | 3  | 8,09  | 12   | 12,00   |
| (B)16hr | Control | Q01650     | Large neutral amino acids transporter small subunit 1             | SLC7A5   | 3  | 8,09  | 6    | 6,00    |
| (B)16hr | SEEL    | Q01650     | Large neutral amino acids transporter small subunit 1             | SLC7A5   | 5  | 6,90  | 108  | 108,00  |
| (B)16hr | SEEL    | Q01650     | Large neutral amino acids transporter small subunit 1             | SLC7A5   | 12 | 18,34 | 297  | 297,00  |
| (B)16hr | SEEL    | Q01650     | Large neutral amino acids transporter small subunit 1             | SLC7A5   | 11 | 18,34 | 222  | 222,00  |
| (B)16hr | SEEL    | Q01650     | Large neutral amino acids transporter small subunit 1             | SLC7A5   | 10 | 16,77 | 198  | 198,00  |
| (B)16hr | SEEL    | Q92536     | Y+L amino acid transporter 2                                      | SLC7A6   | 2  | 3,30  | 4    | 4,00    |
| (B)16hr | SEEL    | Q92536     | Y+L amino acid transporter 2                                      | SLC7A6   | 3  | 9,13  | 14   | 14,00   |
| (B)16hr | SEEL    | Q92536     | Y+L amino acid transporter 2                                      | SLC7A6   | 4  | 10,29 | 10   | 10,00   |
| (B)16hr | Control | P51532     | Transcription activator BRG1                                      | SMARCA4  | 5  | 3,46  | 8    | 8,00    |
| (B)16hr | Control | Q14683     | Structural maintenance of chromosomes protein 1A                  | SMC1A    | 8  | 6,41  | 15   | 15,00   |
| (B)16hr | SEEL    | Q14683     | Structural maintenance of chromosomes protein 1A                  | SMC1A    | 4  | 3,33  | 10   | 10,00   |
| (B)16hr | SEEL    | Q95347     | Structural maintenance of chromosomes protein 2                   | SMC2     | 2  | 1,92  | 3    | 3,00    |
| (B)16hr | SEEL    | Q9UQE7     | Structural maintenance of chromosomes protein 3                   | SMC3     | 11 | 10,52 | 22   | 22,00   |
| (B)16hr | Control | Q9NTJ3     | Structural maintenance of chromosomes protein 4                   | SMC4     | 8  | 6,13  | 15   | 15,00   |
| (B)16hr | SEEL    | Q9NTJ3     | Structural maintenance of chromosomes protein 4                   | SMC4     | 4  | 3,26  | 11   | 11,00   |
| (B)16hr | SEEL    | Q92485     | Acid sphingomyelinase-like phosphodiesterase 3b                   | SMPDL3B  | 8  | 21,32 | 36   | 36,00   |
| (B)16hr | Control | Q7KZF4     | Staphylococcal nuclease domain-containing protein 1               | SND1     | 5  | 6,48  | 8    | 8,00    |
| (B)16hr | Control | O75643     | U5 small nuclear ribonucleoprotein 200 kDa helicase               | SNRNP200 | 13 | 5,81  | 21   | 21,00   |
| (B)16hr | SEEL    | O75643     | U5 small nuclear ribonucleoprotein 200 kDa helicase               | SNRNP200 | 5  | 2,39  | 8    | 8,00    |
| (B)16hr | Control | P08621     | U1 small nuclear ribonucleoprotein 70 kDa                         | SNRNP70  | 15 | 30,43 | 54   | 54,00   |
| (B)16hr | SEEL    | P08621     | U1 small nuclear ribonucleoprotein 70 kDa                         | SNRNP70  | 5  | 9,61  | 13   | 13,00   |
| (B)16hr | SEEL    | Q96PQ0     | VPS10 domain-containing receptor SorCS2                           | SORCS2   | 11 | 9,66  | 25   | 25,00   |
| (B)16hr | Control | Q13813     | Spectrin alpha chain, non-erythrocytic 1                          | SPTAN1   | 38 | 18,04 | 101  | 101,00  |
| (B)16hr | SEEL    | Q13813     | Spectrin alpha chain, non-erythrocytic 1                          | SPTAN1   | 4  | 1,86  | 4    | 4,00    |
| (B)16hr | Control | Q01082     | Spectrin beta chain, non-erythrocytic 1                           | SPTBN1   | 31 | 15,69 | 84   | 84,00   |
| (B)16hr | SEEL    | Q01082     | Spectrin beta chain, non-erythrocytic 1                           | SPTBN1   | 8  | 3,81  | 15   | 15,00   |
| (B)16hr | SEEL    | Q13501     | Sequestosome-1                                                    | SQSTM1   | 5  | 16,59 | 16   | 16,00   |
| (B)16hr | Control | Q96SB4     | SRSF protein kinase 1                                             | SRPK1    | 8  | 13,89 | 31   | 31,00   |
| (B)16hr | SEEL    | Q96SB4     | SRSF protein kinase 1                                             | SRPK1    | 4  | 5,95  | 9    | 9,00    |
| (B)16hr | Control | Q8IYB3     | Serine/arginine repetitive matrix protein 1                       | SRRM1    | 7  | 10,95 | 20   | 20,00   |
| (B)16hr | Control | Q8IYB3     | Serine/arginine repetitive matrix protein 1                       | SRRM1    | 8  | 14,71 | 29   | 29,00   |
| (B)16hr | SEEL    | Q8IYB3     | Serine/arginine repetitive matrix protein 1                       | SRRM1    | 4  | 7,19  | 12   | 12,00   |
| (B)16hr | SEEL    | Q8IYB3     | Serine/arginine repetitive matrix protein 1                       | SRRM1    | 2  | 3,32  | 3    | 3,00    |
| (B)16hr | Control | Q9UQ35     | Serine/arginine repetitive matrix protein 2                       | SRRM2    | 65 | 29,58 | 483  | 483,00  |
| (B)16hr | Control | Q9UQ35     | Serine/arginine repetitive matrix protein 2                       | SRRM2    | 15 | 7,92  | 41   | 41,00   |
| (B)16hr | Control | Q9UQ35     | Serine/arginine repetitive matrix protein 2                       | SRRM2    | 8  | 3,85  | 20   | 20,00   |
| (B)16hr | Control | Q9UQ35     | Serine/arginine repetitive matrix protein 2                       | SRRM2    | 4  | 1,85  | 12   | 12,00   |
| (B)16hr | SEEL    | Q9UQ35     | Serine/arginine repetitive matrix protein 2                       | SRRM2    | 39 | 16,50 | 280  | 280,00  |
| (B)16hr | SEEL    | Q9UQ35     | Serine/arginine repetitive matrix protein 2                       | SRRM2    | 7  | 3,38  | 20   | 20,00   |

|         |         |        |                                                    |         |    |       |      |         |
|---------|---------|--------|----------------------------------------------------|---------|----|-------|------|---------|
| (B)16hr | SEEL    | Q9UQ35 | Serine/arginine repetitive matrix protein 2        | SRRM2   | 5  | 2,69  | 15   | 15,00   |
| (B)16hr | Control | P40763 | Signal transducer and activator of transcription 3 | STAT3   | 4  | 7,66  | 12   | 12,00   |
| (B)16hr | SEEL    | Q687X5 | Metalloreductase STEAP4                            | STEAP4  | 3  | 8,28  | 8    | 8,00    |
| (B)16hr | SEEL    | Q687X5 | Metalloreductase STEAP4                            | STEAP4  | 11 | 32,03 | 83   | 83,00   |
| (B)16hr | SEEL    | Q687X5 | Metalloreductase STEAP4                            | STEAP4  | 11 | 32,03 | 68   | 68,00   |
| (B)16hr | SEEL    | Q687X5 | Metalloreductase STEAP4                            | STEAP4  | 9  | 26,36 | 73   | 73,00   |
| (B)16hr | SEEL    | P27105 | Erythrocyte band 7 integral membrane protein       | STOM    | 4  | 17,71 | 12   | 12,00   |
| (B)16hr | SEEL    | P27105 | Erythrocyte band 7 integral membrane protein       | STOM    | 3  | 10,42 | 9    | 9,00    |
| (B)16hr | SEEL    | Q9BX79 | Stimulated by retinoic acid gene 6 protein homolog | STRA6   | 4  | 6,45  | 13   | 13,00   |
| (B)16hr | SEEL    | Q9BX79 | Stimulated by retinoic acid gene 6 protein homolog | STRA6   | 2  | 3,45  | 8    | 8,00    |
| (B)16hr | Control | O60506 | Heterogeneous nuclear ribonucleoprotein Q          | SYNCRIP | 3  | 4,98  | 5    | 5,00    |
| (B)16hr | SEEL    | Q8WXH0 | Nesprin-2                                          | SYNE2   | 5  | 1,12  | 6    | 6,00    |
| (B)16hr | Control | Q969Z0 | Protein TBRG4                                      | TBRG4   | 6  | 9,19  | 18   | 18,00   |
| (B)16hr | Control | E7ETY2 | Treacle protein                                    | TCOF1   | 4  | 3,16  | 6    | 6,00    |
| (B)16hr | SEEL    | Q13428 | Treacle protein                                    | TCOF1   | 8  | 6,12  | 16   | 16,00   |
| (B)16hr | SEEL    | Q13428 | Treacle protein                                    | TCOF1   | 4  | 3,29  | 8    | 8,00    |
| (B)16hr | Control | P17987 | T-complex protein 1 subunit alpha                  | TCP1    | 23 | 43,71 | 167  | 167,00  |
| (B)16hr | SEEL    | P17987 | T-complex protein 1 subunit alpha                  | TCP1    | 2  | 3,96  | 4    | 4,00    |
| (B)16hr | SEEL    | P17987 | T-complex protein 1 subunit alpha                  | TCP1    | 3  | 5,94  | 6    | 6,00    |
| (B)16hr | SEEL    | P17987 | T-complex protein 1 subunit alpha                  | TCP1    | 22 | 43,35 | 148  | 148,00  |
| (B)16hr | SEEL    | Q9P273 | Teneurin-3                                         | TENM3   | 12 | 5,00  | 26   | 26,00   |
| (B)16hr | SEEL    | Q9P273 | Teneurin-3                                         | TENM3   | 39 | 18,12 | 143  | 143,00  |
| (B)16hr | SEEL    | Q9P273 | Teneurin-3                                         | TENM3   | 2  | 0,78  | 3    | 3,00    |
| (B)16hr | Control | Q92734 | Protein TFG                                        | TFG     | 5  | 16,25 | 35   | 35,00   |
| (B)16hr | SEEL    | Q92734 | Protein TFG                                        | TFG     | 3  | 11,75 | 10   | 10,00   |
| (B)16hr | Control | P02786 | Transferrin receptor protein 1                     | TFRC    | 19 | 28,82 | 72   | 72,00   |
| (B)16hr | Control | P02786 | Transferrin receptor protein 1                     | TFRC    | 8  | 12,76 | 24   | 24,00   |
| (B)16hr | SEEL    | P02786 | Transferrin receptor protein 1                     | TFRC    | 39 | 50,00 | 401  | 401,00  |
| (B)16hr | SEEL    | P02786 | Transferrin receptor protein 1                     | TFRC    | 44 | 54,74 | 783  | 783,00  |
| (B)16hr | SEEL    | P02786 | Transferrin receptor protein 1                     | TFRC    | 51 | 61,97 | 1135 | 1135,00 |
| (B)16hr | SEEL    | P02786 | Transferrin receptor protein 1                     | TFRC    | 38 | 50,66 | 467  | 467,00  |
| (B)16hr | SEEL    | P07996 | Thrombospondin-1                                   | THBS1   | 8  | 8,80  | 13   | 13,00   |
| (B)16hr | Control | Q8NI27 | THO complex subunit 2                              | THOC2   | 8  | 5,84  | 15   | 15,00   |
| (B)16hr | Control | P29401 | Transketolase                                      | TKT     | 4  | 8,51  | 8    | 8,00    |
| (B)16hr | SEEL    | Q9UHN6 | Transmembrane protein 2                            | TMEM2   | 45 | 33,77 | 307  | 307,00  |
| (B)16hr | SEEL    | Q9UHN6 | Transmembrane protein 2                            | TMEM2   | 15 | 11,35 | 36   | 36,00   |
| (B)16hr | SEEL    | Q9NV96 | Cell cycle control protein 50A                     | TMEM30A | 2  | 5,82  | 6    | 6,00    |
| (B)16hr | SEEL    | Q92973 | Transportin-1                                      | TNPO1   | 2  | 3,34  | 6    | 6,00    |
| (B)16hr | Control | Q96GM8 | Target of EGR1 protein 1                           | TOE1    | 6  | 13,73 | 19   | 19,00   |
| (B)16hr | SEEL    | Q96GM8 | Target of EGR1 protein 1                           | TOE1    | 4  | 9,61  | 10   | 10,00   |
| (B)16hr | Control | P11387 | DNA topoisomerase 1                                | TOP1    | 5  | 6,93  | 9    | 9,00    |
| (B)16hr | Control | P11387 | DNA topoisomerase 1                                | TOP1    | 6  | 8,10  | 12   | 12,00   |
| (B)16hr | Control | P11387 | DNA topoisomerase 1                                | TOP1    | 47 | 48,37 | 541  | 541,00  |
| (B)16hr | Control | P11387 | DNA topoisomerase 1                                | TOP1    | 7  | 8,76  | 21   | 21,00   |
| (B)16hr | SEEL    | P11387 | DNA topoisomerase 1                                | TOP1    | 22 | 29,02 | 149  | 149,00  |
| (B)16hr | SEEL    | Q13641 | Trophoblast glycoprotein                           | TPBG    | 2  | 5,00  | 2    | 2,00    |
| (B)16hr | Control | Q12931 | Heat shock protein 75 kDa, mitochondrial           | TRAP1   | 14 | 22,16 | 40   | 40,00   |
| (B)16hr | SEEL    | Q12931 | Heat shock protein 75 kDa, mitochondrial           | TRAP1   | 17 | 25,00 | 60   | 60,00   |
| (B)16hr | Control | Q9H2G4 | Testis-specific Y-encoded-like protein 2           | TSPYL2  | 6  | 6,78  | 14   | 14,00   |
| (B)16hr | Control | Q8WZ42 | Titin                                              | TTN     | 4  | 0,19  | 10   | 10,00   |
| (B)16hr | Control | Q8WZ42 | Titin                                              | TTN     | 5  | 0,17  | 13   | 13,00   |
| (B)16hr | Control | Q8WZ42 | Titin                                              | TTN     | 10 | 0,52  | 24   | 24,00   |
| (B)16hr | SEEL    | Q8WZ42 | Titin                                              | TTN     | 4  | 0,11  | 10   | 10,00   |
| (B)16hr | SEEL    | Q8WZ42 | Titin                                              | TTN     | 9  | 0,48  | 18   | 18,00   |
| (B)16hr | SEEL    | Q8WZ42 | Titin                                              | TTN     | 6  | 0,28  | 10   | 10,00   |
| (B)16hr | Control | P68363 | Tubulin alpha-1B chain                             | TUBA1B  | 7  | 18,40 | 20   | 20,00   |
| (B)16hr | SEEL    | P68363 | Tubulin alpha-1B chain                             | TUBA1B  | 4  | 12,64 | 9    | 9,00    |
| (B)16hr | SEEL    | P68363 | Tubulin alpha-1B chain                             | TUBA1B  | 8  | 23,73 | 25   | 25,00   |
| (B)16hr | SEEL    | P68363 | Tubulin alpha-1B chain                             | TUBA1B  | 8  | 25,06 | 24   | 24,00   |
| (B)16hr | SEEL    | P68363 | Tubulin alpha-1B chain                             | TUBA1B  | 13 | 35,03 | 48   | 48,00   |
| (B)16hr | Control | P26368 | Splicing factor U2AF 65 kDa subunit                | U2AF2   | 5  | 13,47 | 14   | 14,00   |
| (B)16hr | Control | POCG47 | Polyubiquitin-B                                    | UBB     | 4  | 20,52 | 23   | 23,00   |
| (B)16hr | Control | POCG47 | Polyubiquitin-B                                    | UBB     | 4  | 20,52 | 41   | 41,00   |
| (B)16hr | Control | POCG47 | Polyubiquitin-B                                    | UBB     | 4  | 20,52 | 15   | 15,00   |
| (B)16hr | SEEL    | POCG47 | Polyubiquitin-B                                    | UBB     | 6  | 23,14 | 119  | 119,00  |
| (B)16hr | SEEL    | POCG47 | Polyubiquitin-B                                    | UBB     | 6  | 23,14 | 204  | 204,00  |

|              |         |        |                                                                |         |    |       |     |        |
|--------------|---------|--------|----------------------------------------------------------------|---------|----|-------|-----|--------|
| (B)16hr      | SEEL    | P0CG47 | Polyubiquitin-B                                                | UBB     | 6  | 23,14 | 193 | 193,00 |
| (B)16hr      | SEEL    | P0CG47 | Polyubiquitin-B                                                | UBB     | 7  | 25,76 | 136 | 136,00 |
| (B)16hr      | Control | Q9UFQ0 | Putative uncharacterized protein DKFzP434K0435 (Fragment)      | UBC     | 5  | 23,01 | 31  | 31,00  |
| (B)16hr      | SEEL    | Q5T4S7 | E3 ubiquitin-protein ligase UBR4                               | UBR4    | 9  | 1,91  | 17  | 17,00  |
| (B)16hr      | SEEL    | O60701 | UDP-glucose 6-dehydrogenase                                    | UGDH    | 6  | 15,59 | 12  | 12,00  |
| (B)16hr      | Control | Q92900 | Regulator of nonsense transcripts 1                            | UPF1    | 3  | 3,90  | 4   | 4,00   |
| (B)16hr      | Control | Q92900 | Regulator of nonsense transcripts 1                            | UPF1    | 21 | 24,09 | 59  | 59,00  |
| (B)16hr      | SEEL    | O75691 | Small subunit processome component 20 homolog                  | UTP20   | 2  | 0,79  | 4   | 4,00   |
| (B)16hr      | Control | Q8TAA9 | Vang-like protein 1                                            | VANGL1  | 18 | 40,65 | 139 | 139,00 |
| (B)16hr      | SEEL    | Q8TAA9 | Vang-like protein 1                                            | VANGL1  | 17 | 33,59 | 84  | 84,00  |
| (B)16hr      | SEEL    | P26640 | Valine-tRNA ligase                                             | VAR5    | 4  | 3,96  | 9   | 9,00   |
| (B)16hr      | SEEL    | Q6EMK4 | Vasorin                                                        | VASN    | 11 | 20,65 | 42  | 42,00  |
| (B)16hr      | Control | P08670 | Vimentin                                                       | VIM     | 25 | 50,64 | 135 | 135,00 |
| (B)16hr      | SEEL    | P08670 | Vimentin                                                       | VIM     | 23 | 44,21 | 114 | 114,00 |
| (B)16hr      | SEEL    | P04004 | Vitronectin                                                    | VTN     | 5  | 11,72 | 8   | 8,00   |
| (B)16hr      | SEEL    | P04004 | Vitronectin                                                    | VTN     | 4  | 6,90  | 22  | 22,00  |
| (B)16hr      | Control | O14980 | Exportin-1                                                     | XPO1    | 7  | 7,10  | 16  | 16,00  |
| (B)16hr      | SEEL    | O14980 | Exportin-1                                                     | XPO1    | 13 | 14,19 | 32  | 32,00  |
| (B)16hr      | Control | O43592 | Exportin-T                                                     | XPOT    | 3  | 3,85  | 5   | 5,00   |
| (B)16hr      | Control | P13010 | X-ray repair cross-complementing protein 5                     | XRCC5   | 5  | 6,83  | 10  | 10,00  |
| (B)16hr      | Control | P12956 | X-ray repair cross-complementing protein 6                     | XRCC6   | 3  | 6,40  | 8   | 8,00   |
| (B)16hr      | Control | P54577 | Tyrosine-tRNA ligase, cytoplasmic                              | YARS    | 6  | 11,36 | 13  | 13,00  |
| (B)16hr      | SEEL    | P54577 | Tyrosine-tRNA ligase, cytoplasmic                              | YARS    | 8  | 14,58 | 24  | 24,00  |
| (C)16hr(+Ch) | SEEL    | Q9NP58 | ATP-binding cassette sub-family B member 6                     | ABCB6   | 8  | 13,54 | 17  | 17,00  |
| (C)16hr(+Ch) | SEEL    | P33527 | Multidrug resistance-associated protein 1                      | ABCC1   | 14 | 10,65 | 47  | 47,00  |
| (C)16hr(+Ch) | SEEL    | P33527 | Multidrug resistance-associated protein 1                      | ABCC1   | 44 | 35,92 | 203 | 203,00 |
| (C)16hr(+Ch) | SEEL    | O15439 | Multidrug resistance-associated protein 4                      | ABCC4   | 11 | 8,08  | 26  | 26,00  |
| (C)16hr(+Ch) | SEEL    | O15439 | Multidrug resistance-associated protein 4                      | ABCC4   | 34 | 27,70 | 135 | 135,00 |
| (C)16hr(+Ch) | SEEL    | O15440 | Multidrug resistance-associated protein 5                      | ABCC5   | 5  | 3,69  | 8   | 8,00   |
| (C)16hr(+Ch) | SEEL    | O15440 | Multidrug resistance-associated protein 5                      | ABCC5   | 12 | 8,49  | 28  | 28,00  |
| (C)16hr(+Ch) | SEEL    | P61221 | ATP-binding cassette sub-family E member 1                     | ABCE1   | 15 | 25,88 | 79  | 79,00  |
| (C)16hr(+Ch) | Control | Q8NE71 | ATP-binding cassette sub-family F member 1                     | ABCF1   | 13 | 15,62 | 34  | 34,00  |
| (C)16hr(+Ch) | SEEL    | Q8NE71 | ATP-binding cassette sub-family F member 1                     | ABCF1   | 6  | 10,06 | 13  | 13,00  |
| (C)16hr(+Ch) | SEEL    | Q9UG63 | ATP-binding cassette sub-family F member 2                     | ABCF2   | 3  | 4,98  | 8   | 8,00   |
| (C)16hr(+Ch) | SEEL    | Q9UNQ0 | ATP-binding cassette sub-family G member 2                     | ABCG2   | 4  | 7,18  | 6   | 6,00   |
| (C)16hr(+Ch) | Control | Q13085 | Acetyl-CoA carboxylase 1                                       | ACACA   | 96 | 41,26 | 607 | 607,00 |
| (C)16hr(+Ch) | Control | Q13085 | Acetyl-CoA carboxylase 1                                       | ACACA   | 44 | 17,65 | 556 | 556,00 |
| (C)16hr(+Ch) | Control | Q13085 | Acetyl-CoA carboxylase 1                                       | ACACA   | 24 | 11,85 | 76  | 76,00  |
| (C)16hr(+Ch) | Control | Q13085 | Acetyl-CoA carboxylase 1                                       | ACACA   | 5  | 2,64  | 7   | 7,00   |
| (C)16hr(+Ch) | SEEL    | Q13085 | Acetyl-CoA carboxylase 1                                       | ACACA   | 73 | 33,03 | 451 | 451,00 |
| (C)16hr(+Ch) | SEEL    | Q13085 | Acetyl-CoA carboxylase 1                                       | ACACA   | 35 | 16,71 | 263 | 263,00 |
| (C)16hr(+Ch) | Control | O00763 | Acetyl-CoA carboxylase 2                                       | ACACB   | 6  | 1,87  | 14  | 14,00  |
| (C)16hr(+Ch) | SEEL    | O95573 | Long-chain-fatty-acid--CoA ligase 3                            | ACSL3   | 3  | 5,14  | 11  | 11,00  |
| (C)16hr(+Ch) | SEEL    | O60488 | Long-chain-fatty-acid--CoA ligase 4                            | ACSL4   | 8  | 10,69 | 20  | 20,00  |
| (C)16hr(+Ch) | Control | P60709 | Actin, cytoplasmic 1                                           | ACTB    | 3  | 8,27  | 7   | 7,00   |
| (C)16hr(+Ch) | Control | P60709 | Actin, cytoplasmic 1                                           | ACTB    | 4  | 13,07 | 7   | 7,00   |
| (C)16hr(+Ch) | Control | P60709 | Actin, cytoplasmic 1                                           | ACTB    | 3  | 8,27  | 8   | 8,00   |
| (C)16hr(+Ch) | SEEL    | P60709 | Actin, cytoplasmic 1                                           | ACTB    | 5  | 16,53 | 18  | 18,00  |
| (C)16hr(+Ch) | SEEL    | P60709 | Actin, cytoplasmic 1                                           | ACTB    | 4  | 12,53 | 20  | 20,00  |
| (C)16hr(+Ch) | SEEL    | P60709 | Actin, cytoplasmic 1                                           | ACTB    | 2  | 7,47  | 9   | 9,00   |
| (C)16hr(+Ch) | SEEL    | P60709 | Actin, cytoplasmic 1                                           | ACTB    | 9  | 24,80 | 39  | 39,00  |
| (C)16hr(+Ch) | SEEL    | Q13444 | Disintegrin and metalloproteinase domain-containing protein 15 | ADAM15  | 7  | 9,04  | 29  | 29,00  |
| (C)16hr(+Ch) | SEEL    | Q13444 | Disintegrin and metalloproteinase domain-containing protein 15 | ADAM15  | 5  | 6,95  | 14  | 14,00  |
| (C)16hr(+Ch) | SEEL    | P78536 | Disintegrin and metalloproteinase domain-containing protein 17 | ADAM17  | 4  | 4,25  | 11  | 11,00  |
| (C)16hr(+Ch) | SEEL    | P78536 | Disintegrin and metalloproteinase domain-containing protein 17 | ADAM17  | 2  | 2,06  | 3   | 3,00   |
| (C)16hr(+Ch) | SEEL    | O60266 | Adenylate cyclase type 3                                       | ADCY3   | 4  | 5,33  | 8   | 8,00   |
| (C)16hr(+Ch) | SEEL    | O60503 | Adenylate cyclase type 9                                       | ADCY9   | 3  | 2,66  | 6   | 6,00   |
| (C)16hr(+Ch) | SEEL    | O60503 | Adenylate cyclase type 9                                       | ADCY9   | 7  | 5,99  | 17  | 17,00  |
| (C)16hr(+Ch) | SEEL    | O00468 | Agrin                                                          | AGRN    | 9  | 5,08  | 16  | 16,00  |
| (C)16hr(+Ch) | SEEL    | Q09666 | Neuroblast differentiation-associated protein AHNAK            | AHNAK   | 18 | 4,01  | 55  | 55,00  |
| (C)16hr(+Ch) | SEEL    | Q8IVF2 | Protein AHNAK2                                                 | AHNAK2  | 2  | 0,85  | 7   | 7,00   |
| (C)16hr(+Ch) | SEEL    | P02765 | Alpha-2-HS-glycoprotein                                        | AHSG    | 2  | 3,54  | 5   | 5,00   |
| (C)16hr(+Ch) | Control | O95831 | Apoptosis-inducing factor 1, mitochondrial                     | AIFM1   | 4  | 7,01  | 11  | 11,00  |
| (C)16hr(+Ch) | SEEL    | O95831 | Apoptosis-inducing factor 1, mitochondrial                     | AIFM1   | 4  | 7,01  | 12  | 12,00  |
| (C)16hr(+Ch) | Control | Q02040 | A-kinase anchor protein 17A                                    | AKAP17A | 18 | 20,72 | 76  | 76,00  |
| (C)16hr(+Ch) | SEEL    | X6RAJ1 | A-kinase anchor protein 17A                                    | AKAP17A | 8  | 18,61 | 21  | 21,00  |

|            |    |         |            |                                                                                                                         |          |    |       |     |        |
|------------|----|---------|------------|-------------------------------------------------------------------------------------------------------------------------|----------|----|-------|-----|--------|
| (C)16hr(+) | Ch | SEEL    | Q13740     | CD166 antigen                                                                                                           | ALCAM    | 6  | 8,92  | 24  | 24,00  |
| (C)16hr(+) | Ch | SEEL    | Q13740     | CD166 antigen                                                                                                           | ALCAM    | 29 | 53,69 | 374 | 374,00 |
| (C)16hr(+) | Ch | SEEL    | Q13740     | CD166 antigen                                                                                                           | ALCAM    | 4  | 9,09  | 11  | 11,00  |
| (C)16hr(+) | Ch | Control | P54886     | Delta-1-pyrroline-5-carboxylate synthase                                                                                | ALDH18A1 | 12 | 16,98 | 83  | 83,00  |
| (C)16hr(+) | Ch | Control | P54886     | Delta-1-pyrroline-5-carboxylate synthase                                                                                | ALDH18A1 | 8  | 9,94  | 23  | 23,00  |
| (C)16hr(+) | Ch | SEEL    | P54886     | Delta-1-pyrroline-5-carboxylate synthase                                                                                | ALDH18A1 | 16 | 21,51 | 45  | 45,00  |
| (C)16hr(+) | Ch | SEEL    | P54886     | Delta-1-pyrroline-5-carboxylate synthase                                                                                | ALDH18A1 | 5  | 5,91  | 9   | 9,00   |
| (C)16hr(+) | Ch | SEEL    | P09923     | Intestinal-type alkaline phosphatase                                                                                    | ALPI     | 13 | 27,84 | 64  | 64,00  |
| (C)16hr(+) | Ch | SEEL    | P09923     | Intestinal-type alkaline phosphatase                                                                                    | ALPI     | 7  | 14,58 | 27  | 27,00  |
| (C)16hr(+) | Ch | SEEL    | P09923     | Intestinal-type alkaline phosphatase                                                                                    | ALPI     | 17 | 39,77 | 289 | 289,00 |
| (C)16hr(+) | Ch | SEEL    | P05187     | Alkaline phosphatase, placental type                                                                                    | ALPP     | 6  | 16,26 | 19  | 19,00  |
| (C)16hr(+) | Ch | SEEL    | P05187     | Alkaline phosphatase, placental type                                                                                    | ALPP     | 3  | 9,35  | 7   | 7,00   |
| (C)16hr(+) | Ch | SEEL    | P05187     | Alkaline phosphatase, placental type                                                                                    | ALPP     | 2  | 2,06  | 35  | 35,00  |
| (C)16hr(+) | Ch | SEEL    | Q4KMQ2     | Anoctamin-6                                                                                                             | ANO6     | 9  | 11,98 | 22  | 22,00  |
| (C)16hr(+) | Ch | SEEL    | Q4KMQ2     | Anoctamin-6                                                                                                             | ANO6     | 10 | 11,87 | 24  | 24,00  |
| (C)16hr(+) | Ch | SEEL    | P15144     | Aminopeptidase N                                                                                                        | ANPEP    | 15 | 15,20 | 53  | 53,00  |
| (C)16hr(+) | Ch | SEEL    | B5ME49     | AP-1 complex subunit mu-1                                                                                               | AP1M1    | 2  | 0,18  | 13  | 13,00  |
| (C)16hr(+) | Ch | Control | O14617     | AP-3 complex subunit delta-1                                                                                            | AP3D1    | 3  | 2,86  | 5   | 5,00   |
| (C)16hr(+) | Ch | Control | O14617     | AP-3 complex subunit delta-1                                                                                            | AP3D1    | 13 | 11,27 | 39  | 39,00  |
| (C)16hr(+) | Ch | SEEL    | O14617     | AP-3 complex subunit delta-1                                                                                            | AP3D1    | 4  | 3,64  | 10  | 10,00  |
| (C)16hr(+) | Ch | SEEL    | O14617     | AP-3 complex subunit delta-1                                                                                            | AP3D1    | 7  | 6,76  | 17  | 17,00  |
| (C)16hr(+) | Ch | Control | P04114     | Apolipoprotein B-100                                                                                                    | APOB     | 6  | 1,31  | 13  | 13,00  |
| (C)16hr(+) | Ch | SEEL    | P04114     | Apolipoprotein B-100                                                                                                    | APOB     | 17 | 3,33  | 153 | 153,00 |
| (C)16hr(+) | Ch | SEEL    | P04114     | Apolipoprotein B-100                                                                                                    | APOB     | 11 | 2,32  | 46  | 46,00  |
| (C)16hr(+) | Ch | SEEL    | P04114     | Apolipoprotein B-100                                                                                                    | APOB     | 3  | 0,70  | 6   | 6,00   |
| (C)16hr(+) | Ch | Control | P48444     | Coatomer subunit delta                                                                                                  | ARCN1    | 2  | 3,91  | 8   | 8,00   |
| (C)16hr(+) | Ch | SEEL    | P48444     | Coatomer subunit delta                                                                                                  | ARCN1    | 4  | 8,22  | 9   | 9,00   |
| (C)16hr(+) | Ch | Control | A0A024RDY9 | Rho guanine nucleotide exchange factor (GEF) 7, isoform CRA_b                                                           | ARHGEF7  | 7  | 9,13  | 21  | 21,00  |
| (C)16hr(+) | Ch | Control | A0A024RDY9 | Rho guanine nucleotide exchange factor (GEF) 7, isoform CRA_b                                                           | ARHGEF7  | 29 | 43,03 | 191 | 191,00 |
| (C)16hr(+) | Ch | Control | Q14155     | Rho guanine nucleotide exchange factor 7                                                                                | ARHGEF7  | 8  | 8,84  | 21  | 21,00  |
| (C)16hr(+) | Ch | Control | Q9NR48     | Histone-lysine N-methyltransferase ASH1L                                                                                | ASH1L    | 3  | 1,38  | 4   | 4,00   |
| (C)16hr(+) | Ch | SEEL    | Q9NR48     | Histone-lysine N-methyltransferase ASH1L                                                                                | ASH1L    | 5  | 2,26  | 7   | 7,00   |
| (C)16hr(+) | Ch | Control | Q9NV17     | ATPase family AAA domain-containing protein 3A                                                                          | ATAD3A   | 8  | 11,67 | 23  | 23,00  |
| (C)16hr(+) | Ch | SEEL    | Q9NV17     | ATPase family AAA domain-containing protein 3A                                                                          | ATAD3A   | 11 | 18,14 | 30  | 30,00  |
| (C)16hr(+) | Ch | SEEL    | Q9H7F0     | Probable cation-transporting ATPase 13A3                                                                                | ATP13A3  | 3  | 2,77  | 7   | 7,00   |
| (C)16hr(+) | Ch | Control | P05023     | Sodium/potassium-transporting ATPase subunit alpha-1                                                                    | ATP1A1   | 9  | 9,58  | 24  | 24,00  |
| (C)16hr(+) | Ch | Control | P05023     | Sodium/potassium-transporting ATPase subunit alpha-1                                                                    | ATP1A1   | 10 | 10,75 | 35  | 35,00  |
| (C)16hr(+) | Ch | SEEL    | P05023     | Sodium/potassium-transporting ATPase subunit alpha-1                                                                    | ATP1A1   | 30 | 26,49 | 255 | 255,00 |
| (C)16hr(+) | Ch | SEEL    | P05023     | Sodium/potassium-transporting ATPase subunit alpha-1                                                                    | ATP1A1   | 10 | 6,35  | 87  | 87,00  |
| (C)16hr(+) | Ch | SEEL    | P05023     | Sodium/potassium-transporting ATPase subunit alpha-1                                                                    | ATP1A1   | 11 | 6,74  | 146 | 146,00 |
| (C)16hr(+) | Ch | SEEL    | P05023     | Sodium/potassium-transporting ATPase subunit alpha-1                                                                    | ATP1A1   | 18 | 18,38 | 108 | 108,00 |
| (C)16hr(+) | Ch | SEEL    | B3KW93     | cDNA FLJ42590 fis, clone BRACE3009708, highly similar to Sodium/potassium-transporting ATPase alpha-2chain (EC 3.6.3.9) | ATP1A2   | 2  | 2,17  | 10  | 10,00  |
| (C)16hr(+) | Ch | SEEL    | B3KW93     | cDNA FLJ42590 fis, clone BRACE3009708, highly similar to Sodium/potassium-transporting ATPase alpha-2chain (EC 3.6.3.9) | ATP1A2   | 2  | 2,17  | 22  | 22,00  |
| (C)16hr(+) | Ch | SEEL    | P13637     | Sodium/potassium-transporting ATPase subunit alpha-3                                                                    | ATP1A3   | 2  | 1,97  | 9   | 9,00   |
| (C)16hr(+) | Ch | SEEL    | P13637     | Sodium/potassium-transporting ATPase subunit alpha-3                                                                    | ATP1A3   | 2  | 1,97  | 25  | 25,00  |
| (C)16hr(+) | Ch | SEEL    | P05026     | Sodium/potassium-transporting ATPase subunit beta-1                                                                     | ATP1B1   | 2  | 8,25  | 6   | 6,00   |
| (C)16hr(+) | Ch | SEEL    | P05026     | Sodium/potassium-transporting ATPase subunit beta-1                                                                     | ATP1B1   | 7  | 22,77 | 58  | 58,00  |
| (C)16hr(+) | Ch | SEEL    | P05026     | Sodium/potassium-transporting ATPase subunit beta-1                                                                     | ATP1B1   | 7  | 22,77 | 30  | 30,00  |
| (C)16hr(+) | Ch | SEEL    | P54709     | Sodium/potassium-transporting ATPase subunit beta-3                                                                     | ATP1B3   | 6  | 24,73 | 21  | 21,00  |
| (C)16hr(+) | Ch | SEEL    | P54709     | Sodium/potassium-transporting ATPase subunit beta-3                                                                     | ATP1B3   | 5  | 21,86 | 23  | 23,00  |
| (C)16hr(+) | Ch | SEEL    | P54709     | Sodium/potassium-transporting ATPase subunit beta-3                                                                     | ATP1B3   | 6  | 25,81 | 56  | 56,00  |
| (C)16hr(+) | Ch | Control | P16615     | Sarcoplasmic/endoplasmic reticulum calcium ATPase 2                                                                     | ATP2A2   | 6  | 6,24  | 13  | 13,00  |
| (C)16hr(+) | Ch | Control | P16615     | Sarcoplasmic/endoplasmic reticulum calcium ATPase 2                                                                     | ATP2A2   | 15 | 14,40 | 60  | 60,00  |
| (C)16hr(+) | Ch | SEEL    | P16615     | Sarcoplasmic/endoplasmic reticulum calcium ATPase 2                                                                     | ATP2A2   | 4  | 4,61  | 15  | 15,00  |
| (C)16hr(+) | Ch | SEEL    | P16615     | Sarcoplasmic/endoplasmic reticulum calcium ATPase 2                                                                     | ATP2A2   | 14 | 16,03 | 55  | 55,00  |
| (C)16hr(+) | Ch | Control | P20020     | Plasma membrane calcium-transporting ATPase 1                                                                           | ATP2B1   | 11 | 10,49 | 23  | 23,00  |
| (C)16hr(+) | Ch | SEEL    | P20020     | Plasma membrane calcium-transporting ATPase 1                                                                           | ATP2B1   | 14 | 13,20 | 42  | 42,00  |
| (C)16hr(+) | Ch | SEEL    | P20020     | Plasma membrane calcium-transporting ATPase 1                                                                           | ATP2B1   | 8  | 7,87  | 33  | 33,00  |
| (C)16hr(+) | Ch | SEEL    | Q93050     | V-type proton ATPase 116 kDa subunit a isoform 1                                                                        | ATP6V0A1 | 2  | 2,27  | 6   | 6,00   |
| (C)16hr(+) | Ch | SEEL    | O75882     | Attractin                                                                                                               | ATRN     | 3  | 2,59  | 5   | 5,00   |
| (C)16hr(+) | Ch | SEEL    | O75882     | Attractin                                                                                                               | ATRN     | 18 | 12,46 | 87  | 87,00  |
| (C)16hr(+) | Ch | SEEL    | P50895     | Basal cell adhesion molecule                                                                                            | BCAM     | 2  | 4,14  | 5   | 5,00   |
| (C)16hr(+) | Ch | SEEL    | P50895     | Basal cell adhesion molecule                                                                                            | BCAM     | 21 | 41,56 | 147 | 147,00 |
| (C)16hr(+) | Ch | SEEL    | P50895     | Basal cell adhesion molecule                                                                                            | BCAM     | 8  | 16,72 | 36  | 36,00  |
| (C)16hr(+) | Ch | Control | P51587     | Breast cancer type 2 susceptibility protein                                                                             | BRCA2    | 5  | 2,49  | 19  | 19,00  |

|             |         |        |                                                                         |          |    |       |     |        |
|-------------|---------|--------|-------------------------------------------------------------------------|----------|----|-------|-----|--------|
| (C)16hr(+Ch | SEEL    | P35613 | Basigin                                                                 | BSG      | 6  | 16,88 | 21  | 21,00  |
| (C)16hr(+Ch | SEEL    | P35613 | Basigin                                                                 | BSG      | 7  | 21,56 | 31  | 31,00  |
| (C)16hr(+Ch | SEEL    | P35613 | Basigin                                                                 | BSG      | 11 | 35,58 | 476 | 476,00 |
| (C)16hr(+Ch | SEEL    | Q10589 | Bone marrow stromal antigen 2                                           | BST2     | 2  | 13,89 | 6   | 6,00   |
| (C)16hr(+Ch | SEEL    | Q10589 | Bone marrow stromal antigen 2                                           | BST2     | 4  | 18,89 | 26  | 26,00  |
| (C)16hr(+Ch | SEEL    | Q7KYR7 | Butyrophilin subfamily 2 member A1                                      | BTN2A1   | 10 | 18,03 | 57  | 57,00  |
| (C)16hr(+Ch | Control | Q9H8G2 | Caspase activity and apoptosis inhibitor 1                              | CAAP1    | 6  | 18,28 | 22  | 22,00  |
| (C)16hr(+Ch | SEEL    | Q9H8G2 | Caspase activity and apoptosis inhibitor 1                              | CAAP1    | 3  | 10,80 | 9   | 9,00   |
| (C)16hr(+Ch | SEEL    | P54289 | Voltage-dependent calcium channel subunit alpha-2/delta-1               | CACNA2D1 | 29 | 30,19 | 136 | 136,00 |
| (C)16hr(+Ch | Control | P27708 | CAD protein                                                             | CAD      | 5  | 2,52  | 11  | 11,00  |
| (C)16hr(+Ch | SEEL    | P27708 | CAD protein                                                             | CAD      | 3  | 1,71  | 5   | 5,00   |
| (C)16hr(+Ch | SEEL    | Q9BY67 | Cell adhesion molecule 1                                                | CADM1    | 9  | 24,21 | 50  | 50,00  |
| (C)16hr(+Ch | SEEL    | Q8NFZ8 | Cell adhesion molecule 4                                                | CADM4    | 7  | 25,52 | 22  | 22,00  |
| (C)16hr(+Ch | SEEL    | Q03135 | Caveolin-1                                                              | CAV1     | 5  | 35,39 | 32  | 32,00  |
| (C)16hr(+Ch | Control | P49368 | T-complex protein 1 subunit gamma                                       | CCT3     | 10 | 21,65 | 20  | 20,00  |
| (C)16hr(+Ch | SEEL    | P49368 | T-complex protein 1 subunit gamma                                       | CCT3     | 10 | 21,28 | 34  | 34,00  |
| (C)16hr(+Ch | SEEL    | P48643 | T-complex protein 1 subunit epsilon                                     | CCT5     | 4  | 7,76  | 15  | 15,00  |
| (C)16hr(+Ch | Control | P40227 | T-complex protein 1 subunit zeta                                        | CCT6A    | 8  | 16,76 | 26  | 26,00  |
| (C)16hr(+Ch | SEEL    | P40227 | T-complex protein 1 subunit zeta                                        | CCT6A    | 9  | 19,77 | 32  | 32,00  |
| (C)16hr(+Ch | Control | P50990 | T-complex protein 1 subunit theta                                       | CCT8     | 9  | 17,34 | 24  | 24,00  |
| (C)16hr(+Ch | SEEL    | P50990 | T-complex protein 1 subunit theta                                       | CCT8     | 8  | 16,24 | 26  | 26,00  |
| (C)16hr(+Ch | SEEL    | Q6YHK3 | CD109 antigen                                                           | CD109    | 26 | 20,83 | 112 | 112,00 |
| (C)16hr(+Ch | SEEL    | Q6YHK3 | CD109 antigen                                                           | CD109    | 7  | 5,54  | 11  | 11,00  |
| (C)16hr(+Ch | SEEL    | P48509 | CD151 antigen                                                           | CD151    | 4  | 13,04 | 26  | 26,00  |
| (C)16hr(+Ch | SEEL    | P48509 | CD151 antigen                                                           | CD151    | 4  | 13,83 | 19  | 19,00  |
| (C)16hr(+Ch | SEEL    | P48509 | CD151 antigen                                                           | CD151    | 4  | 13,04 | 21  | 21,00  |
| (C)16hr(+Ch | SEEL    | Q5ZPR3 | CD276 antigen                                                           | CD276    | 8  | 23,78 | 41  | 41,00  |
| (C)16hr(+Ch | SEEL    | Q5ZPR3 | CD276 antigen                                                           | CD276    | 8  | 21,16 | 362 | 362,00 |
| (C)16hr(+Ch | SEEL    | Q5ZPR3 | CD276 antigen                                                           | CD276    | 7  | 20,41 | 48  | 48,00  |
| (C)16hr(+Ch | SEEL    | Q9NPF0 | CD320 antigen                                                           | CD320    | 2  | 7,09  | 9   | 9,00   |
| (C)16hr(+Ch | SEEL    | P16070 | CD44 antigen                                                            | CD44     | 9  | 11,73 | 54  | 54,00  |
| (C)16hr(+Ch | SEEL    | P16070 | CD44 antigen                                                            | CD44     | 11 | 16,04 | 182 | 182,00 |
| (C)16hr(+Ch | SEEL    | P16070 | CD44 antigen                                                            | CD44     | 12 | 17,52 | 332 | 332,00 |
| (C)16hr(+Ch | SEEL    | P16070 | CD44 antigen                                                            | CD44     | 10 | 14,96 | 55  | 55,00  |
| (C)16hr(+Ch | SEEL    | P15529 | Membrane cofactor protein                                               | CD46     | 4  | 10,20 | 19  | 19,00  |
| (C)16hr(+Ch | SEEL    | P15529 | Membrane cofactor protein                                               | CD46     | 7  | 15,31 | 102 | 102,00 |
| (C)16hr(+Ch | SEEL    | R4GN18 | Membrane cofactor protein (Fragment)                                    | CD46     | 2  | 19,23 | 32  | 32,00  |
| (C)16hr(+Ch | SEEL    | Q08722 | Leukocyte surface antigen CD47                                          | CD47     | 3  | 8,67  | 41  | 41,00  |
| (C)16hr(+Ch | SEEL    | Q08722 | Leukocyte surface antigen CD47                                          | CD47     | 3  | 8,67  | 26  | 26,00  |
| (C)16hr(+Ch | SEEL    | B1AP13 | Complement decay-accelerating factor                                    | CD55     | 13 | 26,58 | 79  | 79,00  |
| (C)16hr(+Ch | SEEL    | P08174 | Complement decay-accelerating factor                                    | CD55     | 12 | 30,71 | 78  | 78,00  |
| (C)16hr(+Ch | SEEL    | P08174 | Complement decay-accelerating factor                                    | CD55     | 15 | 34,38 | 365 | 365,00 |
| (C)16hr(+Ch | SEEL    | P19256 | Lymphocyte function-associated antigen 3                                | CD58     | 3  | 8,00  | 20  | 20,00  |
| (C)16hr(+Ch | SEEL    | P48960 | CD97 antigen                                                            | CD97     | 7  | 7,19  | 54  | 54,00  |
| (C)16hr(+Ch | SEEL    | P48960 | CD97 antigen                                                            | CD97     | 6  | 9,82  | 37  | 37,00  |
| (C)16hr(+Ch | SEEL    | P48960 | CD97 antigen                                                            | CD97     | 17 | 22,40 | 157 | 157,00 |
| (C)16hr(+Ch | SEEL    | P48960 | CD97 antigen                                                            | CD97     | 15 | 22,87 | 137 | 137,00 |
| (C)16hr(+Ch | SEEL    | P19022 | Cadherin-2                                                              | CDH2     | 8  | 15,23 | 18  | 18,00  |
| (C)16hr(+Ch | SEEL    | P19022 | Cadherin-2                                                              | CDH2     | 18 | 30,35 | 93  | 93,00  |
| (C)16hr(+Ch | SEEL    | P33151 | Cadherin-5                                                              | CDH5     | 13 | 15,69 | 83  | 83,00  |
| (C)16hr(+Ch | SEEL    | P33151 | Cadherin-5                                                              | CDH5     | 4  | 6,12  | 9   | 9,00   |
| (C)16hr(+Ch | Control | P21127 | Cyclin-dependent kinase 11B                                             | CDK11B   | 6  | 7,42  | 12  | 12,00  |
| (C)16hr(+Ch | SEEL    | Q9NYQ6 | Cadherin EGF LAG seven-pass G-type receptor 1                           | CELSR1   | 10 | 4,18  | 30  | 30,00  |
| (C)16hr(+Ch | Control | O76031 | ATP-dependent Clp protease ATP-binding subunit clpX-like, mitochondrial | CLPX     | 2  | 4,11  | 4   | 4,00   |
| (C)16hr(+Ch | SEEL    | O76031 | ATP-dependent Clp protease ATP-binding subunit clpX-like, mitochondrial | CLPX     | 3  | 5,53  | 11  | 11,00  |
| (C)16hr(+Ch | Control | Q00610 | Clathrin heavy chain 1                                                  | CLTC     | 22 | 13,19 | 76  | 76,00  |
| (C)16hr(+Ch | SEEL    | Q00610 | Clathrin heavy chain 1                                                  | CLTC     | 2  | 1,13  | 2   | 2,00   |
| (C)16hr(+Ch | SEEL    | Q00610 | Clathrin heavy chain 1                                                  | CLTC     | 25 | 18,21 | 81  | 81,00  |
| (C)16hr(+Ch | SEEL    | Q9H8M5 | Metal transporter CNNM2                                                 | CNNM2    | 5  | 6,74  | 13  | 13,00  |
| (C)16hr(+Ch | SEEL    | Q9H8M5 | Metal transporter CNNM2                                                 | CNNM2    | 11 | 13,71 | 36  | 36,00  |
| (C)16hr(+Ch | SEEL    | Q9H8M5 | Metal transporter CNNM2                                                 | CNNM2    | 6  | 7,66  | 13  | 13,00  |
| (C)16hr(+Ch | SEEL    | Q8NE01 | Metal transporter CNNM3                                                 | CNNM3    | 2  | 2,40  | 4   | 4,00   |
| (C)16hr(+Ch | SEEL    | Q8NE01 | Metal transporter CNNM3                                                 | CNNM3    | 21 | 36,92 | 69  | 69,00  |
| (C)16hr(+Ch | SEEL    | Q8NE01 | Metal transporter CNNM3                                                 | CNNM3    | 10 | 15,84 | 24  | 24,00  |
| (C)16hr(+Ch | SEEL    | Q6P4Q7 | Metal transporter CNNM4                                                 | CNNM4    | 7  | 9,16  | 19  | 19,00  |
| (C)16hr(+Ch | SEEL    | Q6P4Q7 | Metal transporter CNNM4                                                 | CNNM4    | 8  | 11,61 | 29  | 29,00  |

|                  |         |        |                                                                                                            |        |    |       |     |        |
|------------------|---------|--------|------------------------------------------------------------------------------------------------------------|--------|----|-------|-----|--------|
| (C)16hr(+)<br>Ch | SEEL    | Q6P4Q7 | Metal transporter CNNM4                                                                                    | CNNM4  | 15 | 21,29 | 57  | 57,00  |
| (C)16hr(+)<br>Ch | Control | P53621 | Coatomer subunit alpha                                                                                     | COPA   | 14 | 11,76 | 36  | 36,00  |
| (C)16hr(+)<br>Ch | SEEL    | P53621 | Coatomer subunit alpha                                                                                     | COPA   | 12 | 11,03 | 24  | 24,00  |
| (C)16hr(+)<br>Ch | Control | P53618 | Coatomer subunit beta                                                                                      | COPB1  | 6  | 8,08  | 21  | 21,00  |
| (C)16hr(+)<br>Ch | SEEL    | P53618 | Coatomer subunit beta                                                                                      | COPB1  | 5  | 6,30  | 15  | 15,00  |
| (C)16hr(+)<br>Ch | Control | Q9Y678 | Coatomer subunit gamma-1                                                                                   | COPG1  | 8  | 12,93 | 18  | 18,00  |
| (C)16hr(+)<br>Ch | SEEL    | Q9Y678 | Coatomer subunit gamma-1                                                                                   | COPG1  | 7  | 8,81  | 15  | 15,00  |
| (C)16hr(+)<br>Ch | SEEL    | O75976 | Carboxypeptidase D                                                                                         | CPD    | 11 | 8,41  | 22  | 22,00  |
| (C)16hr(+)<br>Ch | SEEL    | P14384 | Carboxypeptidase M                                                                                         | CPM    | 2  | 3,84  | 5   | 5,00   |
| (C)16hr(+)<br>Ch | Control | Q99829 | Copine-1                                                                                                   | CPNE1  | 8  | 13,97 | 34  | 34,00  |
| (C)16hr(+)<br>Ch | SEEL    | Q99829 | Copine-1                                                                                                   | CPNE1  | 5  | 8,94  | 14  | 14,00  |
| (C)16hr(+)<br>Ch | SEEL    | O75131 | Copine-3                                                                                                   | CPNE3  | 3  | 8,75  | 12  | 12,00  |
| (C)16hr(+)<br>Ch | Control | P31327 | Carbamoyl-phosphate synthase [ammonia], mitochondrial                                                      | CPS1   | 4  | 3,40  | 7   | 7,00   |
| (C)16hr(+)<br>Ch | Control | P31327 | Carbamoyl-phosphate synthase [ammonia], mitochondrial                                                      | CPS1   | 62 | 43,20 | 641 | 641,00 |
| (C)16hr(+)<br>Ch | Control | P31327 | Carbamoyl-phosphate synthase [ammonia], mitochondrial                                                      | CPS1   | 20 | 13,53 | 51  | 51,00  |
| (C)16hr(+)<br>Ch | SEEL    | P31327 | Carbamoyl-phosphate synthase [ammonia], mitochondrial                                                      | CPS1   | 13 | 9,33  | 32  | 32,00  |
| (C)16hr(+)<br>Ch | SEEL    | P31327 | Carbamoyl-phosphate synthase [ammonia], mitochondrial                                                      | CPS1   | 68 | 51,53 | 511 | 511,00 |
| (C)16hr(+)<br>Ch | SEEL    | P31327 | Carbamoyl-phosphate synthase [ammonia], mitochondrial                                                      | CPS1   | 9  | 7,00  | 23  | 23,00  |
| (C)16hr(+)<br>Ch | Control | P50416 | Carnitine O-palmitoyltransferase 1, liver isoform                                                          | CPT1A  | 4  | 5,69  | 9   | 9,00   |
| (C)16hr(+)<br>Ch | SEEL    | P50416 | Carnitine O-palmitoyltransferase 1, liver isoform                                                          | CPT1A  | 2  | 3,36  | 6   | 6,00   |
| (C)16hr(+)<br>Ch | SEEL    | P50416 | Carnitine O-palmitoyltransferase 1, liver isoform                                                          | CPT1A  | 2  | 3,23  | 5   | 5,00   |
| (C)16hr(+)<br>Ch | SEEL    | P50416 | Carnitine O-palmitoyltransferase 1, liver isoform                                                          | CPT1A  | 5  | 6,99  | 10  | 10,00  |
| (C)16hr(+)<br>Ch | Control | P55060 | Exportin-2                                                                                                 | CSE1L  | 4  | 3,91  | 12  | 12,00  |
| (C)16hr(+)<br>Ch | SEEL    | P55060 | Exportin-2                                                                                                 | CSE1L  | 6  | 6,49  | 11  | 11,00  |
| (C)16hr(+)<br>Ch | SEEL    | P15509 | Granulocyte-macrophage colony-stimulating factor receptor subunit alpha                                    | CSF2RA | 4  | 11,00 | 16  | 16,00  |
| (C)16hr(+)<br>Ch | SEEL    | Q6UVK1 | Chondroitin sulfate proteoglycan 4                                                                         | CSPG4  | 67 | 35,92 | 624 | 624,00 |
| (C)16hr(+)<br>Ch | SEEL    | Q6UVK1 | Chondroitin sulfate proteoglycan 4                                                                         | CSPG4  | 45 | 25,58 | 229 | 229,00 |
| (C)16hr(+)<br>Ch | SEEL    | P35221 | Catenin alpha-1                                                                                            | CTNNA1 | 7  | 8,61  | 15  | 15,00  |
| (C)16hr(+)<br>Ch | SEEL    | P35222 | Catenin beta-1                                                                                             | CTNNB1 | 24 | 37,64 | 141 | 141,00 |
| (C)16hr(+)<br>Ch | SEEL    | P35222 | Catenin beta-1                                                                                             | CTNNB1 | 5  | 7,04  | 11  | 11,00  |
| (C)16hr(+)<br>Ch | SEEL    | P17812 | CTP synthase 1                                                                                             | CTPS1  | 4  | 7,11  | 12  | 12,00  |
| (C)16hr(+)<br>Ch | SEEL    | P61073 | C-X-C chemokine receptor type 4                                                                            | CXCR4  | 6  | 18,18 | 29  | 29,00  |
| (C)16hr(+)<br>Ch | SEEL    | P61073 | C-X-C chemokine receptor type 4                                                                            | CXCR4  | 5  | 15,06 | 32  | 32,00  |
| (C)16hr(+)<br>Ch | SEEL    | P61073 | C-X-C chemokine receptor type 4                                                                            | CXCR4  | 6  | 18,18 | 24  | 24,00  |
| (C)16hr(+)<br>Ch | SEEL    | P61073 | C-X-C chemokine receptor type 4                                                                            | CXCR4  | 2  | 8,52  | 13  | 13,00  |
| (C)16hr(+)<br>Ch | SEEL    | Q14118 | Dystroglycan                                                                                               | DAG1   | 12 | 11,17 | 138 | 138,00 |
| (C)16hr(+)<br>Ch | SEEL    | Q14118 | Dystroglycan                                                                                               | DAG1   | 9  | 8,60  | 89  | 89,00  |
| (C)16hr(+)<br>Ch | Control | Q9UER7 | Death domain-associated protein 6                                                                          | DAXX   | 5  | 9,19  | 21  | 21,00  |
| (C)16hr(+)<br>Ch | Control | P11182 | Lipoamide acyltransferase component of branched-chain alpha-keto acid dehydrogenase complex, mitochondrial | DBT    | 7  | 12,03 | 25  | 25,00  |
| (C)16hr(+)<br>Ch | Control | P11182 | Lipoamide acyltransferase component of branched-chain alpha-keto acid dehydrogenase complex, mitochondrial | DBT    | 2  | 4,36  | 6   | 6,00   |
| (C)16hr(+)<br>Ch | Control | P81605 | Dermcidin                                                                                                  | DCD    | 2  | 20,00 | 9   | 9,00   |
| (C)16hr(+)<br>Ch | SEEL    | P81605 | Dermcidin                                                                                                  | DCD    | 2  | 20,00 | 6   | 6,00   |
| (C)16hr(+)<br>Ch | SEEL    | Q16832 | Discoidin domain-containing receptor 2                                                                     | DDR2   | 4  | 5,03  | 7   | 7,00   |
| (C)16hr(+)<br>Ch | Control | Q92499 | ATP-dependent RNA helicase DDX1                                                                            | DDX1   | 5  | 5,54  | 9   | 9,00   |
| (C)16hr(+)<br>Ch | SEEL    | Q92499 | ATP-dependent RNA helicase DDX1                                                                            | DDX1   | 8  | 11,89 | 17  | 17,00  |
| (C)16hr(+)<br>Ch | Control | Q92841 | Probable ATP-dependent RNA helicase DDX17                                                                  | DDX17  | 5  | 7,96  | 15  | 15,00  |
| (C)16hr(+)<br>Ch | SEEL    | Q92841 | Probable ATP-dependent RNA helicase DDX17                                                                  | DDX17  | 5  | 7,96  | 15  | 15,00  |
| (C)16hr(+)<br>Ch | Control | Q9UHI6 | Probable ATP-dependent RNA helicase DDX20                                                                  | DDX20  | 13 | 17,48 | 49  | 49,00  |
| (C)16hr(+)<br>Ch | SEEL    | Q9UHI6 | Probable ATP-dependent RNA helicase DDX20                                                                  | DDX20  | 6  | 9,47  | 12  | 12,00  |
| (C)16hr(+)<br>Ch | Control | Q9NR30 | Nucleolar RNA helicase 2                                                                                   | DDX21  | 15 | 18,65 | 50  | 50,00  |
| (C)16hr(+)<br>Ch | SEEL    | Q9NR30 | Nucleolar RNA helicase 2                                                                                   | DDX21  | 11 | 14,94 | 28  | 28,00  |
| (C)16hr(+)<br>Ch | Control | Q9BUQ8 | Probable ATP-dependent RNA helicase DDX23                                                                  | DDX23  | 13 | 16,10 | 44  | 44,00  |
| (C)16hr(+)<br>Ch | SEEL    | Q9BUQ8 | Probable ATP-dependent RNA helicase DDX23                                                                  | DDX23  | 8  | 9,63  | 16  | 16,00  |
| (C)16hr(+)<br>Ch | SEEL    | Q9GZ7  | ATP-dependent RNA helicase DDX24                                                                           | DDX24  | 7  | 9,78  | 15  | 15,00  |
| (C)16hr(+)<br>Ch | Control | O00571 | ATP-dependent RNA helicase DDX3X                                                                           | DDX3X  | 18 | 29,46 | 79  | 79,00  |
| (C)16hr(+)<br>Ch | SEEL    | O00571 | ATP-dependent RNA helicase DDX3X                                                                           | DDX3X  | 19 | 30,21 | 112 | 112,00 |
| (C)16hr(+)<br>Ch | Control | P17844 | Probable ATP-dependent RNA helicase DDX5                                                                   | DDX5   | 18 | 24,92 | 80  | 80,00  |
| (C)16hr(+)<br>Ch | SEEL    | P17844 | Probable ATP-dependent RNA helicase DDX5                                                                   | DDX5   | 16 | 22,31 | 85  | 85,00  |
| (C)16hr(+)<br>Ch | Control | Q8TDD1 | ATP-dependent RNA helicase DDX54                                                                           | DDX54  | 4  | 4,65  | 6   | 6,00   |
| (C)16hr(+)<br>Ch | Control | O43143 | Putative pre-mRNA-splicing factor ATP-dependent RNA helicase DHX15                                         | DHX15  | 8  | 10,57 | 21  | 21,00  |
| (C)16hr(+)<br>Ch | SEEL    | O43143 | Putative pre-mRNA-splicing factor ATP-dependent RNA helicase DHX15                                         | DHX15  | 3  | 4,03  | 6   | 6,00   |
| (C)16hr(+)<br>Ch | Control | Q7L2E3 | Putative ATP-dependent RNA helicase DHX30                                                                  | DHX30  | 4  | 2,43  | 6   | 6,00   |
| (C)16hr(+)<br>Ch | SEEL    | Q7L2E3 | Putative ATP-dependent RNA helicase DHX30                                                                  | DHX30  | 5  | 4,10  | 9   | 9,00   |
| (C)16hr(+)<br>Ch | Control | Q8IY37 | Probable ATP-dependent RNA helicase DHX37                                                                  | DHX37  | 2  | 1,64  | 3   | 3,00   |
| (C)16hr(+)<br>Ch | Control | Q08211 | ATP-dependent RNA helicase A                                                                               | DHX9   | 27 | 20,55 | 115 | 115,00 |

|             |         |        |                                                                                                                  |         |    |       |     |        |
|-------------|---------|--------|------------------------------------------------------------------------------------------------------------------|---------|----|-------|-----|--------|
| (C)16hr(+Ch | SEEL    | Q08211 | ATP-dependent RNA helicase A                                                                                     | DHX9    | 22 | 18,35 | 83  | 83,00  |
| (C)16hr(+Ch | SEEL    | Q9P265 | Disco-interacting protein 2 homolog B                                                                            | DIP2B   | 7  | 4,76  | 18  | 18,00  |
| (C)16hr(+Ch | SEEL    | Q9P265 | Disco-interacting protein 2 homolog B                                                                            | DIP2B   | 7  | 4,76  | 20  | 20,00  |
| (C)16hr(+Ch | Control | B4DJX1 | Acetyltransferase component of pyruvate dehydrogenase complex                                                    | DLAT    | 14 | 26,57 | 103 | 103,00 |
| (C)16hr(+Ch | Control | P10515 | Dihydrolipoyllysine-residue acetyltransferase component of pyruvate dehydrogenase complex, mitochondrial         | DLAT    | 7  | 11,75 | 26  | 26,00  |
| (C)16hr(+Ch | Control | P10515 | Dihydrolipoyllysine-residue acetyltransferase component of pyruvate dehydrogenase complex, mitochondrial         | DLAT    | 14 | 19,01 | 103 | 103,00 |
| (C)16hr(+Ch | Control | P10515 | Dihydrolipoyllysine-residue acetyltransferase component of pyruvate dehydrogenase complex, mitochondrial         | DLAT    | 13 | 22,41 | 307 | 307,00 |
| (C)16hr(+Ch | SEEL    | P10515 | Dihydrolipoyllysine-residue acetyltransferase component of pyruvate dehydrogenase complex, mitochondrial         | DLAT    | 11 | 17,31 | 60  | 60,00  |
| (C)16hr(+Ch | Control | P09622 | Dihydrolipoyl dehydrogenase, mitochondrial                                                                       | DLD     | 6  | 11,98 | 20  | 20,00  |
| (C)16hr(+Ch | Control | P09622 | Dihydrolipoyl dehydrogenase, mitochondrial                                                                       | DLD     | 6  | 11,98 | 15  | 15,00  |
| (C)16hr(+Ch | Control | P09622 | Dihydrolipoyl dehydrogenase, mitochondrial                                                                       | DLD     | 17 | 34,77 | 179 | 179,00 |
| (C)16hr(+Ch | Control | P36957 | Dihydrolipoyllysine-residue succinyltransferase component of 2-oxoglutarate dehydrogenase complex, mitochondrial | DLST    | 5  | 11,48 | 13  | 13,00  |
| (C)16hr(+Ch | Control | P36957 | Dihydrolipoyllysine-residue succinyltransferase component of 2-oxoglutarate dehydrogenase complex, mitochondrial | DLST    | 9  | 17,22 | 30  | 30,00  |
| (C)16hr(+Ch | Control | P36957 | Dihydrolipoyllysine-residue succinyltransferase component of 2-oxoglutarate dehydrogenase complex, mitochondrial | DLST    | 5  | 11,48 | 16  | 16,00  |
| (C)16hr(+Ch | SEEL    | Q02487 | Desmocollin-2                                                                                                    | DSC2    | 7  | 9,88  | 25  | 25,00  |
| (C)16hr(+Ch | SEEL    | Q14574 | Desmocollin-3                                                                                                    | DSC3    | 2  | 3,68  | 4   | 4,00   |
| (C)16hr(+Ch | SEEL    | Q14126 | Desmoglein-2                                                                                                     | DSG2    | 8  | 8,77  | 22  | 22,00  |
| (C)16hr(+Ch | SEEL    | Q14126 | Desmoglein-2                                                                                                     | DSG2    | 41 | 55,10 | 466 | 466,00 |
| (C)16hr(+Ch | SEEL    | Q14126 | Desmoglein-2                                                                                                     | DSG2    | 33 | 37,66 | 243 | 243,00 |
| (C)16hr(+Ch | SEEL    | Q14126 | Desmoglein-2                                                                                                     | DSG2    | 8  | 10,02 | 28  | 28,00  |
| (C)16hr(+Ch | Control | P15924 | Desmoplakin                                                                                                      | DSP     | 5  | 1,88  | 9   | 9,00   |
| (C)16hr(+Ch | Control | P15924 | Desmoplakin                                                                                                      | DSP     | 17 | 5,54  | 31  | 31,00  |
| (C)16hr(+Ch | SEEL    | P15924 | Desmoplakin                                                                                                      | DSP     | 10 | 3,27  | 17  | 17,00  |
| (C)16hr(+Ch | SEEL    | P15924 | Desmoplakin                                                                                                      | DSP     | 15 | 5,05  | 33  | 33,00  |
| (C)16hr(+Ch | Control | Q14204 | Cytoplasmic dynein 1 heavy chain 1                                                                               | DYNC1H1 | 15 | 3,75  | 31  | 31,00  |
| (C)16hr(+Ch | SEEL    | Q14204 | Cytoplasmic dynein 1 heavy chain 1                                                                               | DYNC1H1 | 72 | 15,73 | 207 | 207,00 |
| (C)16hr(+Ch | SEEL    | P42892 | Endothelin-converting enzyme 1                                                                                   | ECE1    | 6  | 9,35  | 20  | 20,00  |
| (C)16hr(+Ch | SEEL    | P42892 | Endothelin-converting enzyme 1                                                                                   | ECE1    | 28 | 41,56 | 270 | 270,00 |
| (C)16hr(+Ch | SEEL    | O95672 | Endothelin-converting enzyme-like 1                                                                              | ECEL1   | 5  | 7,48  | 19  | 19,00  |
| (C)16hr(+Ch | SEEL    | O43854 | EGF-like repeat and discoidin I-like domain-containing protein 3                                                 | EDIL3   | 12 | 27,71 | 45  | 45,00  |
| (C)16hr(+Ch | Control | P68104 | Elongation factor 1-alpha 1                                                                                      | EEF1A1  | 9  | 17,75 | 39  | 39,00  |
| (C)16hr(+Ch | Control | P68104 | Elongation factor 1-alpha 1                                                                                      | EEF1A1  | 2  | 4,55  | 6   | 6,00   |
| (C)16hr(+Ch | Control | P68104 | Elongation factor 1-alpha 1                                                                                      | EEF1A1  | 4  | 8,23  | 11  | 11,00  |
| (C)16hr(+Ch | Control | P68104 | Elongation factor 1-alpha 1                                                                                      | EEF1A1  | 6  | 12,55 | 19  | 19,00  |
| (C)16hr(+Ch | SEEL    | P68104 | Elongation factor 1-alpha 1                                                                                      | EEF1A1  | 9  | 16,45 | 41  | 41,00  |
| (C)16hr(+Ch | SEEL    | P68104 | Elongation factor 1-alpha 1                                                                                      | EEF1A1  | 9  | 21,86 | 43  | 43,00  |
| (C)16hr(+Ch | SEEL    | P68104 | Elongation factor 1-alpha 1                                                                                      | EEF1A1  | 10 | 23,16 | 35  | 35,00  |
| (C)16hr(+Ch | SEEL    | P68104 | Elongation factor 1-alpha 1                                                                                      | EEF1A1  | 9  | 18,18 | 51  | 51,00  |
| (C)16hr(+Ch | Control | P13639 | Elongation factor 2                                                                                              | EEF2    | 28 | 29,84 | 146 | 146,00 |
| (C)16hr(+Ch | SEEL    | P13639 | Elongation factor 2                                                                                              | EEF2    | 5  | 6,29  | 8   | 8,00   |
| (C)16hr(+Ch | SEEL    | P13639 | Elongation factor 2                                                                                              | EEF2    | 36 | 41,84 | 155 | 155,00 |
| (C)16hr(+Ch | Control | Q15029 | 116 kDa U5 small nuclear ribonucleoprotein component                                                             | EFTUD2  | 3  | 3,50  | 5   | 5,00   |
| (C)16hr(+Ch | Control | P00533 | Epidermal growth factor receptor                                                                                 | EGFR    | 3  | 2,73  | 7   | 7,00   |
| (C)16hr(+Ch | SEEL    | P00533 | Epidermal growth factor receptor                                                                                 | EGFR    | 20 | 17,60 | 85  | 85,00  |
| (C)16hr(+Ch | SEEL    | P00533 | Epidermal growth factor receptor                                                                                 | EGFR    | 59 | 49,75 | 814 | 814,00 |
| (C)16hr(+Ch | SEEL    | P00533 | Epidermal growth factor receptor                                                                                 | EGFR    | 26 | 25,54 | 157 | 157,00 |
| (C)16hr(+Ch | SEEL    | P00533 | Epidermal growth factor receptor                                                                                 | EGFR    | 9  | 8,02  | 22  | 22,00  |
| (C)16hr(+Ch | SEEL    | Q9H223 | EH domain-containing protein 4                                                                                   | EHD4    | 5  | 13,68 | 10  | 10,00  |
| (C)16hr(+Ch | Control | Q9NZJ5 | Eukaryotic translation initiation factor 2-alpha kinase 3                                                        | EIF2AK3 | 4  | 5,38  | 23  | 23,00  |
| (C)16hr(+Ch | Control | O60841 | Eukaryotic translation initiation factor 5B                                                                      | EIF5B   | 4  | 3,11  | 15  | 15,00  |
| (C)16hr(+Ch | SEEL    | O60841 | Eukaryotic translation initiation factor 5B                                                                      | EIF5B   | 9  | 8,44  | 22  | 22,00  |
| (C)16hr(+Ch | SEEL    | P17813 | Endoglin                                                                                                         | ENG     | 2  | 4,56  | 5   | 5,00   |
| (C)16hr(+Ch | SEEL    | P17813 | Endoglin                                                                                                         | ENG     | 10 | 18,84 | 35  | 35,00  |
| (C)16hr(+Ch | SEEL    | P17813 | Endoglin                                                                                                         | ENG     | 20 | 31,76 | 146 | 146,00 |
| (C)16hr(+Ch | SEEL    | P17813 | Endoglin                                                                                                         | ENG     | 10 | 18,84 | 54  | 54,00  |
| (C)16hr(+Ch | SEEL    | P29317 | Ephrin type-A receptor 2                                                                                         | EPHA2   | 6  | 7,48  | 12  | 12,00  |
| (C)16hr(+Ch | SEEL    | P29317 | Ephrin type-A receptor 2                                                                                         | EPHA2   | 7  | 8,20  | 20  | 20,00  |
| (C)16hr(+Ch | SEEL    | P29317 | Ephrin type-A receptor 2                                                                                         | EPHA2   | 18 | 21,82 | 59  | 59,00  |
| (C)16hr(+Ch | SEEL    | P29323 | Ephrin type-B receptor 2                                                                                         | EPHB2   | 6  | 7,39  | 13  | 13,00  |
| (C)16hr(+Ch | SEEL    | P54760 | Ephrin type-B receptor 4                                                                                         | EPHB4   | 12 | 14,89 | 27  | 27,00  |
| (C)16hr(+Ch | SEEL    | P54760 | Ephrin type-B receptor 4                                                                                         | EPHB4   | 30 | 34,75 | 169 | 169,00 |
| (C)16hr(+Ch | Control | P58107 | Epiplakin                                                                                                        | EPPK1   | 6  | 1,38  | 12  | 12,00  |
| (C)16hr(+Ch | SEEL    | P58107 | Epiplakin                                                                                                        | EPPK1   | 3  | 0,79  | 5   | 5,00   |



|               |         |        |                                                                                                                 |          |    |       |     |        |
|---------------|---------|--------|-----------------------------------------------------------------------------------------------------------------|----------|----|-------|-----|--------|
| (C)16hr(+)+Ch | Control | P07814 | Bifunctional glutamate/proline--tRNA ligase                                                                     | EPRS     | 10 | 5,89  | 30  | 30,00  |
| (C)16hr(+)+Ch | SEEL    | P07814 | Bifunctional glutamate/proline--tRNA ligase                                                                     | EPRS     | 16 | 11,11 | 40  | 40,00  |
| (C)16hr(+)+Ch | SEEL    | P04626 | Receptor tyrosine-protein kinase erbB-2                                                                         | ERBB2    | 15 | 13,55 | 76  | 76,00  |
| (C)16hr(+)+Ch | SEEL    | P04626 | Receptor tyrosine-protein kinase erbB-2                                                                         | ERBB2    | 2  | 1,27  | 5   | 5,00   |
| (C)16hr(+)+Ch | SEEL    | Q9BSJ8 | Extended synaptotagmin-1                                                                                        | ESYT1    | 3  | 3,62  | 4   | 4,00   |
| (C)16hr(+)+Ch | Control | H7BXI1 | Extended synaptotagmin-2 (Fragment)                                                                             | ESYT2    | 11 | 14,03 | 32  | 32,00  |
| (C)16hr(+)+Ch | SEEL    | H7BXI1 | Extended synaptotagmin-2 (Fragment)                                                                             | ESYT2    | 8  | 10,07 | 17  | 17,00  |
| (C)16hr(+)+Ch | SEEL    | Q9NZB2 | Constitutive coactivator of PPAR-gamma-like protein 1                                                           | FAM120A  | 6  | 6,80  | 14  | 14,00  |
| (C)16hr(+)+Ch | Control | P49327 | Fatty acid synthase                                                                                             | FASN     | 31 | 12,43 | 95  | 95,00  |
| (C)16hr(+)+Ch | SEEL    | P49327 | Fatty acid synthase                                                                                             | FASN     | 36 | 16,89 | 88  | 88,00  |
| (C)16hr(+)+Ch | SEEL    | Q14517 | Protocadherin Fat 1                                                                                             | FAT1     | 10 | 2,51  | 17  | 17,00  |
| (C)16hr(+)+Ch | Control | P21333 | Filamin-A                                                                                                       | FLNA     | 9  | 4,72  | 16  | 16,00  |
| (C)16hr(+)+Ch | Control | P21333 | Filamin-A                                                                                                       | FLNA     | 43 | 20,51 | 124 | 124,00 |
| (C)16hr(+)+Ch | SEEL    | P21333 | Filamin-A                                                                                                       | FLNA     | 21 | 10,92 | 45  | 45,00  |
| (C)16hr(+)+Ch | Control | O75369 | Filamin-B                                                                                                       | FLNB     | 5  | 2,19  | 6   | 6,00   |
| (C)16hr(+)+Ch | SEEL    | O75369 | Filamin-B                                                                                                       | FLNB     | 5  | 3,50  | 17  | 17,00  |
| (C)16hr(+)+Ch | SEEL    | B2RB38 | cDNA, FLJ95288, highly similar to Homo sapiens feline leukemia virus subgroup C cellular receptor (FLVCR), mRNA | FLVCR1   | 6  | 14,77 | 19  | 19,00  |
| (C)16hr(+)+Ch | SEEL    | Q9Y5Y0 | Feline leukemia virus subgroup C receptor-related protein 1                                                     | FLVCR1   | 3  | 5,77  | 7   | 7,00   |
| (C)16hr(+)+Ch | Control | P35637 | RNA-binding protein FUS                                                                                         | FUS      | 7  | 14,26 | 59  | 59,00  |
| (C)16hr(+)+Ch | SEEL    | P35637 | RNA-binding protein FUS                                                                                         | FUS      | 4  | 6,27  | 16  | 16,00  |
| (C)16hr(+)+Ch | SEEL    | Q14697 | Neutral alpha-glucosidase AB                                                                                    | GANAB    | 7  | 8,69  | 18  | 18,00  |
| (C)16hr(+)+Ch | Control | P41250 | Glycine--tRNA ligase                                                                                            | GARS     | 7  | 8,93  | 20  | 20,00  |
| (C)16hr(+)+Ch | SEEL    | P41250 | Glycine--tRNA ligase                                                                                            | GARS     | 8  | 11,91 | 20  | 20,00  |
| (C)16hr(+)+Ch | Control | Q92616 | Translational activator GCN1                                                                                    | GCN1L1   | 4  | 1,57  | 11  | 11,00  |
| (C)16hr(+)+Ch | SEEL    | P57678 | Gem-associated protein 4                                                                                        | GEMIN4   | 8  | 7,84  | 28  | 28,00  |
| (C)16hr(+)+Ch | Control | Q9HBB9 | HC56                                                                                                            | GEMIN4   | 18 | 19,10 | 55  | 55,00  |
| (C)16hr(+)+Ch | SEEL    | P19440 | Gamma-glutamyltranspeptidase 1                                                                                  | GGT1     | 8  | 13,01 | 23  | 23,00  |
| (C)16hr(+)+Ch | Control | Q9Y2X7 | ARF GTPase-activating protein GIT1                                                                              | GIT1     | 6  | 8,02  | 13  | 13,00  |
| (C)16hr(+)+Ch | Control | Q9Y2X7 | ARF GTPase-activating protein GIT1                                                                              | GIT1     | 27 | 38,11 | 184 | 184,00 |
| (C)16hr(+)+Ch | Control | Q9Y2X7 | ARF GTPase-activating protein GIT1                                                                              | GIT1     | 8  | 12,48 | 68  | 68,00  |
| (C)16hr(+)+Ch | Control | Q14161 | ARF GTPase-activating protein GIT2                                                                              | GIT2     | 4  | 6,06  | 7   | 7,00   |
| (C)16hr(+)+Ch | Control | Q14161 | ARF GTPase-activating protein GIT2                                                                              | GIT2     | 25 | 34,12 | 166 | 166,00 |
| (C)16hr(+)+Ch | Control | Q14161 | ARF GTPase-activating protein GIT2                                                                              | GIT2     | 5  | 6,46  | 12  | 12,00  |
| (C)16hr(+)+Ch | SEEL    | Q92896 | Golgi apparatus protein 1                                                                                       | GLG1     | 19 | 17,39 | 52  | 52,00  |
| (C)16hr(+)+Ch | Control | Q9BVP2 | Guanine nucleotide-binding protein-like 3                                                                       | GNL3     | 4  | 6,74  | 8   | 8,00   |
| (C)16hr(+)+Ch | SEEL    | Q9BVP2 | Guanine nucleotide-binding protein-like 3                                                                       | GNL3     | 5  | 9,47  | 14  | 14,00  |
| (C)16hr(+)+Ch | SEEL    | P15586 | N-acetylglucosamine-6-sulfatase                                                                                 | GNS      | 5  | 9,42  | 10  | 10,00  |
| (C)16hr(+)+Ch | SEEL    | P35052 | Glypican-1                                                                                                      | GPC1     | 15 | 32,97 | 72  | 72,00  |
| (C)16hr(+)+Ch | SEEL    | P43304 | Glycerol-3-phosphate dehydrogenase, mitochondrial                                                               | GPD2     | 12 | 18,29 | 26  | 26,00  |
| (C)16hr(+)+Ch | SEEL    | Q9Y653 | G-protein coupled receptor 56                                                                                   | GPR56    | 4  | 6,35  | 8   | 8,00   |
| (C)16hr(+)+Ch | SEEL    | Q8NFJ5 | Retinoic acid-induced protein 3                                                                                 | GPRC5A   | 6  | 24,37 | 18  | 18,00  |
| (C)16hr(+)+Ch | SEEL    | Q8NFJ5 | Retinoic acid-induced protein 3                                                                                 | GPRC5A   | 5  | 22,41 | 39  | 39,00  |
| (C)16hr(+)+Ch | SEEL    | Q8NFJ5 | Retinoic acid-induced protein 3                                                                                 | GPRC5A   | 4  | 19,33 | 20  | 20,00  |
| (C)16hr(+)+Ch | SEEL    | Q8NFJ5 | Retinoic acid-induced protein 3                                                                                 | GPRC5A   | 4  | 17,93 | 14  | 14,00  |
| (C)16hr(+)+Ch | Control | P28799 | Granulins                                                                                                       | GRN      | 12 | 20,40 | 57  | 57,00  |
| (C)16hr(+)+Ch | Control | P28799 | Granulins                                                                                                       | GRN      | 16 | 25,63 | 149 | 149,00 |
| (C)16hr(+)+Ch | SEEL    | P28799 | Granulins                                                                                                       | GRN      | 10 | 18,89 | 40  | 40,00  |
| (C)16hr(+)+Ch | SEEL    | P28799 | Granulins                                                                                                       | GRN      | 11 | 17,71 | 59  | 59,00  |
| (C)16hr(+)+Ch | SEEL    | Q9BZE4 | Nucleolar GTP-binding protein 1                                                                                 | GTPBP4   | 6  | 10,41 | 17  | 17,00  |
| (C)16hr(+)+Ch | Control | P40939 | Trifunctional enzyme subunit alpha, mitochondrial                                                               | HADHA    | 3  | 4,59  | 6   | 6,00   |
| (C)16hr(+)+Ch | Control | Q00341 | Vigilin                                                                                                         | HDLBP    | 2  | 1,81  | 6   | 6,00   |
| (C)16hr(+)+Ch | SEEL    | Q9ULI3 | Protein HEG homolog 1                                                                                           | HEG1     | 7  | 5,43  | 28  | 28,00  |
| (C)16hr(+)+Ch | Control | P10412 | Histone H1.4                                                                                                    | HIST1H1E | 4  | 10,50 | 20  | 20,00  |
| (C)16hr(+)+Ch | SEEL    | P10412 | Histone H1.4                                                                                                    | HIST1H1E | 4  | 15,07 | 10  | 10,00  |
| (C)16hr(+)+Ch | Control | P52789 | Hexokinase-2                                                                                                    | HK2      | 3  | 3,38  | 9   | 9,00   |
| (C)16hr(+)+Ch | SEEL    | P01891 | HLA class I histocompatibility antigen, A-68 alpha chain                                                        | HLA-A    | 2  | 7,40  | 8   | 8,00   |
| (C)16hr(+)+Ch | Control | P61978 | Heterogeneous nuclear ribonucleoprotein K                                                                       | HNRNPK   | 11 | 29,37 | 54  | 54,00  |
| (C)16hr(+)+Ch | SEEL    | P61978 | Heterogeneous nuclear ribonucleoprotein K                                                                       | HNRNPK   | 8  | 22,03 | 39  | 39,00  |
| (C)16hr(+)+Ch | Control | B2R959 | cDNA, FLJ94229, highly similar to Homo sapiens heterogeneous nuclear ribonucleoprotein L (HNRPL), mRNA          | HNRNPL   | 8  | 18,64 | 20  | 20,00  |
| (C)16hr(+)+Ch | SEEL    | P14866 | Heterogeneous nuclear ribonucleoprotein L                                                                       | HNRNPL   | 4  | 9,17  | 8   | 8,00   |
| (C)16hr(+)+Ch | Control | P52272 | Heterogeneous nuclear ribonucleoprotein M                                                                       | HNRNPM   | 10 | 17,81 | 26  | 26,00  |
| (C)16hr(+)+Ch | SEEL    | P52272 | Heterogeneous nuclear ribonucleoprotein M                                                                       | HNRNPM   | 11 | 16,99 | 47  | 47,00  |
| (C)16hr(+)+Ch | Control | O43390 | Heterogeneous nuclear ribonucleoprotein R                                                                       | HNRNPR   | 2  | 3,16  | 3   | 3,00   |
| (C)16hr(+)+Ch | Control | Q00839 | Heterogeneous nuclear ribonucleoprotein U                                                                       | HNRNPU   | 8  | 10,18 | 39  | 39,00  |
| (C)16hr(+)+Ch | SEEL    | Q00839 | Heterogeneous nuclear ribonucleoprotein U                                                                       | HNRNPU   | 7  | 10,55 | 17  | 17,00  |

|             |         |        |                                                          |          |    |       |      |         |
|-------------|---------|--------|----------------------------------------------------------|----------|----|-------|------|---------|
| (C)16hr(+Ch | SEEL    | Q00839 | Heterogeneous nuclear ribonucleoprotein U                | HNRNPU   | 8  | 11,88 | 20   | 20,00   |
| (C)16hr(+Ch | Control | Q9BUJ2 | Heterogeneous nuclear ribonucleoprotein U-like protein 1 | HNRNPUL1 | 18 | 26,05 | 103  | 103,00  |
| (C)16hr(+Ch | SEEL    | Q9BUJ2 | Heterogeneous nuclear ribonucleoprotein U-like protein 1 | HNRNPUL1 | 11 | 16,36 | 44   | 44,00   |
| (C)16hr(+Ch | Control | Q86Y23 | Hornerin                                                 | HRNR     | 7  | 3,86  | 23   | 23,00   |
| (C)16hr(+Ch | Control | Q86Y23 | Hornerin                                                 | HRNR     | 7  | 4,00  | 24   | 24,00   |
| (C)16hr(+Ch | SEEL    | Q86Y23 | Hornerin                                                 | HRNR     | 4  | 2,35  | 17   | 17,00   |
| (C)16hr(+Ch | Control | P07900 | Heat shock protein HSP 90-alpha                          | HSP90AA1 | 4  | 5,87  | 7    | 7,00    |
| (C)16hr(+Ch | SEEL    | P07900 | Heat shock protein HSP 90-alpha                          | HSP90AA1 | 9  | 12,84 | 44   | 44,00   |
| (C)16hr(+Ch | Control | P08238 | Heat shock protein HSP 90-beta                           | HSP90AB1 | 12 | 19,06 | 67   | 67,00   |
| (C)16hr(+Ch | SEEL    | P08238 | Heat shock protein HSP 90-beta                           | HSP90AB1 | 10 | 14,64 | 23   | 23,00   |
| (C)16hr(+Ch | SEEL    | P08238 | Heat shock protein HSP 90-beta                           | HSP90AB1 | 16 | 24,59 | 81   | 81,00   |
| (C)16hr(+Ch | SEEL    | P08238 | Heat shock protein HSP 90-beta                           | HSP90AB1 | 4  | 5,66  | 10   | 10,00   |
| (C)16hr(+Ch | Control | P14625 | Endoplasmic                                              | HSP90B1  | 13 | 15,69 | 51   | 51,00   |
| (C)16hr(+Ch | SEEL    | P14625 | Endoplasmic                                              | HSP90B1  | 13 | 17,68 | 31   | 31,00   |
| (C)16hr(+Ch | SEEL    | P14625 | Endoplasmic                                              | HSP90B1  | 2  | 2,12  | 15   | 15,00   |
| (C)16hr(+Ch | Control | P08107 | Heat shock 70 kDa protein 1A/1B                          | HSPA1A   | 13 | 23,24 | 72   | 72,00   |
| (C)16hr(+Ch | Control | P11021 | 78 kDa glucose-regulated protein                         | HSPA5    | 46 | 59,79 | 777  | 777,00  |
| (C)16hr(+Ch | SEEL    | P11021 | 78 kDa glucose-regulated protein                         | HSPA5    | 43 | 60,86 | 496  | 496,00  |
| (C)16hr(+Ch | Control | P11142 | Heat shock cognate 71 kDa protein                        | HSPA8    | 16 | 28,48 | 145  | 145,00  |
| (C)16hr(+Ch | SEEL    | P11142 | Heat shock cognate 71 kDa protein                        | HSPA8    | 31 | 51,24 | 303  | 303,00  |
| (C)16hr(+Ch | Control | P38646 | Stress-70 protein, mitochondrial                         | HSPA9    | 6  | 10,60 | 18   | 18,00   |
| (C)16hr(+Ch | Control | P38646 | Stress-70 protein, mitochondrial                         | HSPA9    | 16 | 29,31 | 59   | 59,00   |
| (C)16hr(+Ch | Control | P38646 | Stress-70 protein, mitochondrial                         | HSPA9    | 57 | 60,53 | 1391 | 1391,00 |
| (C)16hr(+Ch | SEEL    | P38646 | Stress-70 protein, mitochondrial                         | HSPA9    | 7  | 11,93 | 15   | 15,00   |
| (C)16hr(+Ch | SEEL    | P38646 | Stress-70 protein, mitochondrial                         | HSPA9    | 50 | 58,76 | 919  | 919,00  |
| (C)16hr(+Ch | Control | P10809 | 60 kDa heat shock protein, mitochondrial                 | HSPD1    | 23 | 41,71 | 130  | 130,00  |
| (C)16hr(+Ch | SEEL    | P10809 | 60 kDa heat shock protein, mitochondrial                 | HSPD1    | 3  | 5,24  | 5    | 5,00    |
| (C)16hr(+Ch | SEEL    | P10809 | 60 kDa heat shock protein, mitochondrial                 | HSPD1    | 22 | 41,54 | 149  | 149,00  |
| (C)16hr(+Ch | Control | Q92598 | Heat shock protein 105 kDa                               | HSPH1    | 4  | 5,01  | 8    | 8,00    |
| (C)16hr(+Ch | SEEL    | Q92598 | Heat shock protein 105 kDa                               | HSPH1    | 7  | 9,79  | 15   | 15,00   |
| (C)16hr(+Ch | SEEL    | Q72627 | E3 ubiquitin-protein ligase HUWE1                        | HUWE1    | 6  | 1,87  | 9    | 9,00    |
| (C)16hr(+Ch | Control | Q9Y4L1 | Hypoxia up-regulated protein 1                           | HYOU1    | 8  | 9,51  | 21   | 21,00   |
| (C)16hr(+Ch | SEEL    | Q9Y4L1 | Hypoxia up-regulated protein 1                           | HYOU1    | 2  | 3,40  | 4    | 4,00    |
| (C)16hr(+Ch | Control | P41252 | Isoleucine--tRNA ligase, cytoplasmic                     | IARS     | 13 | 10,38 | 26   | 26,00   |
| (C)16hr(+Ch | SEEL    | P41252 | Isoleucine--tRNA ligase, cytoplasmic                     | IARS     | 15 | 13,15 | 51   | 51,00   |
| (C)16hr(+Ch | Control | Q9NSE4 | Isoleucine--tRNA ligase, mitochondrial                   | IARS2    | 7  | 8,10  | 16   | 16,00   |
| (C)16hr(+Ch | SEEL    | P05362 | Intercellular adhesion molecule 1                        | ICAM1    | 3  | 6,02  | 8    | 8,00    |
| (C)16hr(+Ch | SEEL    | P05362 | Intercellular adhesion molecule 1                        | ICAM1    | 14 | 28,57 | 59   | 59,00   |
| (C)16hr(+Ch | SEEL    | P05362 | Intercellular adhesion molecule 1                        | ICAM1    | 29 | 45,68 | 533  | 533,00  |
| (C)16hr(+Ch | SEEL    | P05362 | Intercellular adhesion molecule 1                        | ICAM1    | 19 | 33,08 | 154  | 154,00  |
| (C)16hr(+Ch | SEEL    | O75144 | ICOS ligand                                              | ICOSLG   | 2  | 6,95  | 5    | 5,00    |
| (C)16hr(+Ch | Control | Q16666 | Gamma-interferon-inducible protein 16                    | IFI16    | 3  | 4,20  | 6    | 6,00    |
| (C)16hr(+Ch | SEEL    | P08069 | Insulin-like growth factor 1 receptor                    | IGF1R    | 18 | 13,53 | 51   | 51,00   |
| (C)16hr(+Ch | SEEL    | P08069 | Insulin-like growth factor 1 receptor                    | IGF1R    | 43 | 35,99 | 360  | 360,00  |
| (C)16hr(+Ch | SEEL    | P08069 | Insulin-like growth factor 1 receptor                    | IGF1R    | 6  | 4,02  | 25   | 25,00   |
| (C)16hr(+Ch | SEEL    | P11717 | Cation-independent mannose-6-phosphate receptor          | IGF2R    | 72 | 29,79 | 395  | 395,00  |
| (C)16hr(+Ch | SEEL    | P11717 | Cation-independent mannose-6-phosphate receptor          | IGF2R    | 79 | 34,28 | 476  | 476,00  |
| (C)16hr(+Ch | SEEL    | P11717 | Cation-independent mannose-6-phosphate receptor          | IGF2R    | 7  | 2,97  | 10   | 10,00   |
| (C)16hr(+Ch | SEEL    | O75054 | Immunoglobulin superfamily member 3                      | IGSF3    | 5  | 4,27  | 11   | 11,00   |
| (C)16hr(+Ch | SEEL    | Q969P0 | Immunoglobulin superfamily member 8                      | IGSF8    | 10 | 20,72 | 44   | 44,00   |
| (C)16hr(+Ch | SEEL    | Q16891 | MICOS complex subunit MIC60                              | IMMT     | 8  | 12,01 | 14   | 14,00   |
| (C)16hr(+Ch | SEEL    | P06213 | Insulin receptor                                         | INSR     | 21 | 13,10 | 74   | 74,00   |
| (C)16hr(+Ch | SEEL    | P06213 | Insulin receptor                                         | INSR     | 41 | 26,99 | 283  | 283,00  |
| (C)16hr(+Ch | SEEL    | P06213 | Insulin receptor                                         | INSR     | 4  | 3,04  | 12   | 12,00   |
| (C)16hr(+Ch | Control | P46940 | Ras GTPase-activating-like protein IQGAP1                | IQGAP1   | 3  | 2,05  | 5    | 5,00    |
| (C)16hr(+Ch | SEEL    | P46940 | Ras GTPase-activating-like protein IQGAP1                | IQGAP1   | 9  | 7,48  | 18   | 18,00   |
| (C)16hr(+Ch | SEEL    | Q96J02 | E3 ubiquitin-protein ligase Itchy homolog                | ITCH     | 6  | 7,42  | 13   | 13,00   |
| (C)16hr(+Ch | SEEL    | Q8TB96 | T-cell immunomodulatory protein                          | ITFG1    | 9  | 20,26 | 38   | 38,00   |
| (C)16hr(+Ch | SEEL    | Q9H0X4 | Protein ITFG3                                            | ITFG3    | 11 | 20,83 | 62   | 62,00   |
| (C)16hr(+Ch | SEEL    | P56199 | Integrin alpha-1                                         | ITGA1    | 9  | 7,38  | 24   | 24,00   |
| (C)16hr(+Ch | SEEL    | P56199 | Integrin alpha-1                                         | ITGA1    | 30 | 23,83 | 191  | 191,00  |
| (C)16hr(+Ch | SEEL    | P17301 | Integrin alpha-2                                         | ITGA2    | 21 | 18,63 | 68   | 68,00   |
| (C)16hr(+Ch | SEEL    | P17301 | Integrin alpha-2                                         | ITGA2    | 6  | 7,11  | 50   | 50,00   |
| (C)16hr(+Ch | SEEL    | P17301 | Integrin alpha-2                                         | ITGA2    | 16 | 14,48 | 51   | 51,00   |
| (C)16hr(+Ch | SEEL    | P26006 | Integrin alpha-3                                         | ITGA3    | 10 | 9,71  | 38   | 38,00   |
| (C)16hr(+Ch | SEEL    | P26006 | Integrin alpha-3                                         | ITGA3    | 16 | 14,94 | 157  | 157,00  |

|            |    |         |        |                                                                          |           |    |       |     |        |
|------------|----|---------|--------|--------------------------------------------------------------------------|-----------|----|-------|-----|--------|
| (C)16hr(+) | Ch | SEEL    | P08648 | Integrin alpha-5                                                         | ITGA5     | 15 | 19,07 | 107 | 107,00 |
| (C)16hr(+) | Ch | SEEL    | P08648 | Integrin alpha-5                                                         | ITGA5     | 10 | 13,63 | 42  | 42,00  |
| (C)16hr(+) | Ch | SEEL    | P23229 | Integrin alpha-6                                                         | ITGA6     | 26 | 27,43 | 125 | 125,00 |
| (C)16hr(+) | Ch | SEEL    | P23229 | Integrin alpha-6                                                         | ITGA6     | 9  | 8,05  | 34  | 34,00  |
| (C)16hr(+) | Ch | SEEL    | A5YM53 | ITGAV protein                                                            | ITGAV     | 36 | 39,12 | 148 | 148,00 |
| (C)16hr(+) | Ch | SEEL    | A5YM53 | ITGAV protein                                                            | ITGAV     | 42 | 42,65 | 346 | 346,00 |
| (C)16hr(+) | Ch | SEEL    | P06756 | Integrin alpha-V                                                         | ITGAV     | 6  | 6,97  | 17  | 17,00  |
| (C)16hr(+) | Ch | SEEL    | P05556 | Integrin beta-1                                                          | ITGB1     | 6  | 6,89  | 14  | 14,00  |
| (C)16hr(+) | Ch | SEEL    | P05556 | Integrin beta-1                                                          | ITGB1     | 29 | 32,46 | 463 | 463,00 |
| (C)16hr(+) | Ch | SEEL    | P05556 | Integrin beta-1                                                          | ITGB1     | 24 | 28,20 | 216 | 216,00 |
| (C)16hr(+) | Ch | SEEL    | P05556 | Integrin beta-1                                                          | ITGB1     | 6  | 8,52  | 18  | 18,00  |
| (C)16hr(+) | Ch | SEEL    | P16144 | Integrin beta-4                                                          | ITGB4     | 39 | 22,89 | 157 | 157,00 |
| (C)16hr(+) | Ch | SEEL    | P18084 | Integrin beta-5                                                          | ITGB5     | 3  | 4,01  | 6   | 6,00   |
| (C)16hr(+) | Ch | SEEL    | P18084 | Integrin beta-5                                                          | ITGB5     | 28 | 37,30 | 149 | 149,00 |
| (C)16hr(+) | Ch | SEEL    | P26012 | Integrin beta-8                                                          | ITGB8     | 7  | 10,66 | 22  | 22,00  |
| (C)16hr(+) | Ch | SEEL    | P23458 | Tyrosine-protein kinase JAK1                                             | JAK1      | 8  | 6,41  | 14  | 14,00  |
| (C)16hr(+) | Ch | SEEL    | P23458 | Tyrosine-protein kinase JAK1                                             | JAK1      | 12 | 12,05 | 23  | 23,00  |
| (C)16hr(+) | Ch | SEEL    | P14923 | Junction plakoglobin                                                     | JUP       | 3  | 5,64  | 4   | 4,00   |
| (C)16hr(+) | Ch | SEEL    | P14923 | Junction plakoglobin                                                     | JUP       | 9  | 14,63 | 26  | 26,00  |
| (C)16hr(+) | Ch | SEEL    | P14923 | Junction plakoglobin                                                     | JUP       | 22 | 38,79 | 188 | 188,00 |
| (C)16hr(+) | Ch | SEEL    | P14923 | Junction plakoglobin                                                     | JUP       | 18 | 31,01 | 215 | 215,00 |
| (C)16hr(+) | Ch | Control | Q92945 | Far upstream element-binding protein 2                                   | KHSRP     | 4  | 6,19  | 7   | 7,00   |
| (C)16hr(+) | Ch | SEEL    | Q92945 | Far upstream element-binding protein 2                                   | KHSRP     | 3  | 4,92  | 8   | 8,00   |
| (C)16hr(+) | Ch | SEEL    | Q6NSJ0 | Uncharacterized family 31 glucosidase KIAA1161                           | KIAA1161  | 13 | 17,51 | 44  | 44,00  |
| (C)16hr(+) | Ch | SEEL    | Q9HCM3 | UPF0606 protein KIAA1549                                                 | KIAA1549  | 8  | 3,90  | 34  | 34,00  |
| (C)16hr(+) | Ch | SEEL    | Q9HCM3 | UPF0606 protein KIAA1549                                                 | KIAA1549  | 4  | 2,72  | 14  | 14,00  |
| (C)16hr(+) | Ch | SEEL    | Q9HCM3 | UPF0606 protein KIAA1549                                                 | KIAA1549  | 10 | 5,44  | 25  | 25,00  |
| (C)16hr(+) | Ch | SEEL    | Q9ULH0 | Kinase D-interacting substrate of 220 kDa                                | KIDINS220 | 15 | 8,92  | 40  | 40,00  |
| (C)16hr(+) | Ch | SEEL    | Q96J84 | Kin of IRRE-like protein 1                                               | KIRREL    | 11 | 20,34 | 40  | 40,00  |
| (C)16hr(+) | Ch | SEEL    | Q96J84 | Kin of IRRE-like protein 1                                               | KIRREL    | 4  | 8,19  | 10  | 10,00  |
| (C)16hr(+) | Ch | Control | Q53GT1 | Kelch-like protein 22                                                    | KLHL22    | 14 | 27,44 | 43  | 43,00  |
| (C)16hr(+) | Ch | SEEL    | Q53GT1 | Kelch-like protein 22                                                    | KLHL22    | 9  | 14,20 | 22  | 22,00  |
| (C)16hr(+) | Ch | Control | Q8NEZ4 | Histone-lysine N-methyltransferase 2C                                    | KMT2C     | 4  | 1,26  | 39  | 39,00  |
| (C)16hr(+) | Ch | SEEL    | Q14974 | Importin subunit beta-1                                                  | KPNB1     | 6  | 9,47  | 12  | 12,00  |
| (C)16hr(+) | Ch | SEEL    | H3BLW5 | Neural cell adhesion molecule L1 (Fragment)                              | L1CAM     | 2  | 18,30 | 4   | 4,00   |
| (C)16hr(+) | Ch | SEEL    | P32004 | Neural cell adhesion molecule L1                                         | L1CAM     | 11 | 9,79  | 24  | 24,00  |
| (C)16hr(+) | Ch | SEEL    | P32004 | Neural cell adhesion molecule L1                                         | L1CAM     | 42 | 35,64 | 612 | 612,00 |
| (C)16hr(+) | Ch | SEEL    | P32004 | Neural cell adhesion molecule L1                                         | L1CAM     | 17 | 16,15 | 66  | 66,00  |
| (C)16hr(+) | Ch | SEEL    | P32004 | Neural cell adhesion molecule L1                                         | L1CAM     | 7  | 4,85  | 25  | 25,00  |
| (C)16hr(+) | Ch | SEEL    | O15230 | Laminin subunit alpha-5                                                  | LAMA5     | 30 | 9,77  | 72  | 72,00  |
| (C)16hr(+) | Ch | SEEL    | O15230 | Laminin subunit alpha-5                                                  | LAMA5     | 9  | 3,46  | 20  | 20,00  |
| (C)16hr(+) | Ch | SEEL    | P07942 | Laminin subunit beta-1                                                   | LAMB1     | 8  | 5,54  | 17  | 17,00  |
| (C)16hr(+) | Ch | SEEL    | P11047 | Laminin subunit gamma-1                                                  | LAMC1     | 10 | 8,02  | 28  | 28,00  |
| (C)16hr(+) | Ch | SEEL    | P11279 | Lysosome-associated membrane glycoprotein 1                              | LAMP1     | 6  | 14,15 | 40  | 40,00  |
| (C)16hr(+) | Ch | SEEL    | P01130 | Low-density lipoprotein receptor                                         | LDLR      | 6  | 7,33  | 11  | 11,00  |
| (C)16hr(+) | Ch | SEEL    | P01130 | Low-density lipoprotein receptor                                         | LDLR      | 19 | 24,53 | 133 | 133,00 |
| (C)16hr(+) | Ch | SEEL    | P01130 | Low-density lipoprotein receptor                                         | LDLR      | 9  | 10,58 | 37  | 37,00  |
| (C)16hr(+) | Ch | SEEL    | P01130 | Low-density lipoprotein receptor                                         | LDLR      | 2  | 3,14  | 4   | 4,00   |
| (C)16hr(+) | Ch | Control | Q08380 | Galectin-3-binding protein                                               | LGALS3BP  | 8  | 14,19 | 38  | 38,00  |
| (C)16hr(+) | Ch | SEEL    | Q08380 | Galectin-3-binding protein                                               | LGALS3BP  | 9  | 15,90 | 36  | 36,00  |
| (C)16hr(+) | Ch | SEEL    | Q9BXB1 | Leucine-rich repeat-containing G-protein coupled receptor 4              | LGR4      | 3  | 2,84  | 5   | 5,00   |
| (C)16hr(+) | Ch | SEEL    | Q9BXB1 | Leucine-rich repeat-containing G-protein coupled receptor 4              | LGR4      | 6  | 6,73  | 10  | 10,00  |
| (C)16hr(+) | Ch | SEEL    | P42702 | Leukemia inhibitory factor receptor                                      | LIFR      | 6  | 6,11  | 14  | 14,00  |
| (C)16hr(+) | Ch | Control | P02545 | Prelamin-A/C                                                             | LMNA      | 29 | 46,23 | 157 | 157,00 |
| (C)16hr(+) | Ch | SEEL    | P02545 | Prelamin-A/C                                                             | LMNA      | 26 | 41,42 | 121 | 121,00 |
| (C)16hr(+) | Ch | Control | Q9UIQ6 | Leucyl-cystinyl aminopeptidase                                           | LNPEP     | 7  | 6,05  | 17  | 17,00  |
| (C)16hr(+) | Ch | SEEL    | Q9UIQ6 | Leucyl-cystinyl aminopeptidase                                           | LNPEP     | 33 | 31,90 | 243 | 243,00 |
| (C)16hr(+) | Ch | Control | P36776 | Lon protease homolog, mitochondrial                                      | LONP1     | 4  | 4,48  | 7   | 7,00   |
| (C)16hr(+) | Ch | SEEL    | Q9P244 | Leucine-rich repeat and fibronectin type III domain-containing protein 1 | LRFN1     | 6  | 9,47  | 12  | 12,00  |
| (C)16hr(+) | Ch | SEEL    | Q6PJG9 | Leucine-rich repeat and fibronectin type-III domain-containing protein 4 | LRFN4     | 7  | 11,97 | 22  | 22,00  |
| (C)16hr(+) | Ch | SEEL    | Q07954 | Prolow-density lipoprotein receptor-related protein 1                    | LRP1      | 6  | 1,45  | 11  | 11,00  |
| (C)16hr(+) | Ch | SEEL    | B7ZLD0 | LRP6 protein                                                             | LRP6      | 6  | 3,89  | 12  | 12,00  |
| (C)16hr(+) | Ch | SEEL    | Q14114 | Low-density lipoprotein receptor-related protein 8                       | LRP8      | 3  | 3,53  | 5   | 5,00   |
| (C)16hr(+) | Ch | Control | P42704 | Leucine-rich PPR motif-containing protein, mitochondrial                 | LRPPRC    | 3  | 2,22  | 5   | 5,00   |
| (C)16hr(+) | Ch | SEEL    | Q8IWT6 | Volume-regulated anion channel subunit LRRC8A                            | LRRC8A    | 12 | 16,54 | 46  | 46,00  |
| (C)16hr(+) | Ch | SEEL    | Q8IWT6 | Volume-regulated anion channel subunit LRRC8A                            | LRRC8A    | 22 | 30,62 | 95  | 95,00  |

|            |    |         |            |                                                                |         |    |       |     |        |
|------------|----|---------|------------|----------------------------------------------------------------|---------|----|-------|-----|--------|
| (C)16hr(+) | Ch | SEEL    | Q8IWT6     | Volume-regulated anion channel subunit LRRC8A                  | LRRC8A  | 29 | 41,60 | 167 | 167,00 |
| (C)16hr(+) | Ch | SEEL    | Q8IWT6     | Volume-regulated anion channel subunit LRRC8A                  | LRRC8A  | 3  | 4,57  | 5   | 5,00   |
| (C)16hr(+) | Ch | SEEL    | Q8TDW0     | Volume-regulated anion channel subunit LRRC8C                  | LRRC8C  | 4  | 5,60  | 6   | 6,00   |
| (C)16hr(+) | Ch | SEEL    | Q8TDW0     | Volume-regulated anion channel subunit LRRC8C                  | LRRC8C  | 6  | 7,47  | 18  | 18,00  |
| (C)16hr(+) | Ch | SEEL    | Q8TDW0     | Volume-regulated anion channel subunit LRRC8C                  | LRRC8C  | 9  | 12,20 | 23  | 23,00  |
| (C)16hr(+) | Ch | SEEL    | Q7L1W4     | Volume-regulated anion channel subunit LRRC8D                  | LRRC8D  | 9  | 11,19 | 22  | 22,00  |
| (C)16hr(+) | Ch | SEEL    | Q7L1W4     | Volume-regulated anion channel subunit LRRC8D                  | LRRC8D  | 7  | 9,79  | 16  | 16,00  |
| (C)16hr(+) | Ch | SEEL    | Q7L1W4     | Volume-regulated anion channel subunit LRRC8D                  | LRRC8D  | 13 | 17,48 | 38  | 38,00  |
| (C)16hr(+) | Ch | SEEL    | Q6NSJ5     | Volume-regulated anion channel subunit LRRC8E                  | LRRC8E  | 10 | 12,94 | 32  | 32,00  |
| (C)16hr(+) | Ch | SEEL    | Q6NSJ5     | Volume-regulated anion channel subunit LRRC8E                  | LRRC8E  | 11 | 15,45 | 32  | 32,00  |
| (C)16hr(+) | Ch | SEEL    | Q6NSJ5     | Volume-regulated anion channel subunit LRRC8E                  | LRRC8E  | 9  | 14,95 | 21  | 21,00  |
| (C)16hr(+) | Ch | SEEL    | Q86X29     | Lipolysis-stimulated lipoprotein receptor                      | LSR     | 2  | 4,01  | 8   | 8,00   |
| (C)16hr(+) | Ch | SEEL    | Q9NS15     | Latent-transforming growth factor beta-binding protein 3       | LTBP3   | 2  | 4,45  | 4   | 4,00   |
| (C)16hr(+) | Ch | SEEL    | Q9UPN3     | Microtubule-actin cross-linking factor 1, isoforms 1/2/3/5     | MACF1   | 4  | 0,83  | 6   | 6,00   |
| (C)16hr(+) | Ch | Control | P56192     | Methionine--tRNA ligase, cytoplasmic                           | MARS    | 3  | 3,33  | 10  | 10,00  |
| (C)16hr(+) | Ch | SEEL    | P43121     | Cell surface glycoprotein MUC18                                | MCAM    | 9  | 15,02 | 26  | 26,00  |
| (C)16hr(+) | Ch | SEEL    | P43121     | Cell surface glycoprotein MUC18                                | MCAM    | 32 | 43,03 | 438 | 438,00 |
| (C)16hr(+) | Ch | SEEL    | P43121     | Cell surface glycoprotein MUC18                                | MCAM    | 40 | 55,11 | 959 | 959,00 |
| (C)16hr(+) | Ch | SEEL    | P43121     | Cell surface glycoprotein MUC18                                | MCAM    | 17 | 29,88 | 153 | 153,00 |
| (C)16hr(+) | Ch | Control | Q96RQ3     | Methylcrotonoyl-CoA carboxylase subunit alpha, mitochondrial   | MCCC1   | 6  | 9,79  | 13  | 13,00  |
| (C)16hr(+) | Ch | Control | Q96RQ3     | Methylcrotonoyl-CoA carboxylase subunit alpha, mitochondrial   | MCCC1   | 16 | 20,55 | 60  | 60,00  |
| (C)16hr(+) | Ch | Control | Q96RQ3     | Methylcrotonoyl-CoA carboxylase subunit alpha, mitochondrial   | MCCC1   | 18 | 24,83 | 63  | 63,00  |
| (C)16hr(+) | Ch | Control | Q96RQ3     | Methylcrotonoyl-CoA carboxylase subunit alpha, mitochondrial   | MCCC1   | 35 | 58,34 | 696 | 696,00 |
| (C)16hr(+) | Ch | SEEL    | Q96RQ3     | Methylcrotonoyl-CoA carboxylase subunit alpha, mitochondrial   | MCCC1   | 5  | 8,14  | 11  | 11,00  |
| (C)16hr(+) | Ch | SEEL    | Q96RQ3     | Methylcrotonoyl-CoA carboxylase subunit alpha, mitochondrial   | MCCC1   | 6  | 10,62 | 15  | 15,00  |
| (C)16hr(+) | Ch | SEEL    | Q96RQ3     | Methylcrotonoyl-CoA carboxylase subunit alpha, mitochondrial   | MCCC1   | 9  | 15,86 | 27  | 27,00  |
| (C)16hr(+) | Ch | SEEL    | Q96RQ3     | Methylcrotonoyl-CoA carboxylase subunit alpha, mitochondrial   | MCCC1   | 32 | 52,28 | 387 | 387,00 |
| (C)16hr(+) | Ch | Control | Q9HCC0     | Methylcrotonoyl-CoA carboxylase beta chain, mitochondrial      | MCCC2   | 5  | 10,12 | 12  | 12,00  |
| (C)16hr(+) | Ch | Control | Q9HCC0     | Methylcrotonoyl-CoA carboxylase beta chain, mitochondrial      | MCCC2   | 27 | 47,60 | 355 | 355,00 |
| (C)16hr(+) | Ch | SEEL    | Q9HCC0     | Methylcrotonoyl-CoA carboxylase beta chain, mitochondrial      | MCCC2   | 22 | 43,69 | 200 | 200,00 |
| (C)16hr(+) | Ch | Control | P49736     | DNA replication licensing factor MCM2                          | MCM2    | 3  | 3,76  | 6   | 6,00   |
| (C)16hr(+) | Ch | SEEL    | P49736     | DNA replication licensing factor MCM2                          | MCM2    | 5  | 6,42  | 20  | 20,00  |
| (C)16hr(+) | Ch | Control | P25205     | DNA replication licensing factor MCM3                          | MCM3    | 14 | 17,70 | 28  | 28,00  |
| (C)16hr(+) | Ch | SEEL    | P25205     | DNA replication licensing factor MCM3                          | MCM3    | 12 | 14,98 | 23  | 23,00  |
| (C)16hr(+) | Ch | Control | P33991     | DNA replication licensing factor MCM4                          | MCM4    | 18 | 22,60 | 70  | 70,00  |
| (C)16hr(+) | Ch | SEEL    | P33991     | DNA replication licensing factor MCM4                          | MCM4    | 12 | 15,99 | 36  | 36,00  |
| (C)16hr(+) | Ch | Control | P33992     | DNA replication licensing factor MCM5                          | MCM5    | 17 | 22,89 | 57  | 57,00  |
| (C)16hr(+) | Ch | SEEL    | P33992     | DNA replication licensing factor MCM5                          | MCM5    | 12 | 17,98 | 33  | 33,00  |
| (C)16hr(+) | Ch | Control | Q14566     | DNA replication licensing factor MCM6                          | MCM6    | 25 | 29,84 | 108 | 108,00 |
| (C)16hr(+) | Ch | SEEL    | Q14566     | DNA replication licensing factor MCM6                          | MCM6    | 17 | 20,71 | 50  | 50,00  |
| (C)16hr(+) | Ch | Control | P33993     | DNA replication licensing factor MCM7                          | MCM7    | 19 | 31,02 | 81  | 81,00  |
| (C)16hr(+) | Ch | Control | P33993     | DNA replication licensing factor MCM7                          | MCM7    | 16 | 28,23 | 54  | 54,00  |
| (C)16hr(+) | Ch | SEEL    | P33993     | DNA replication licensing factor MCM7                          | MCM7    | 19 | 32,68 | 67  | 67,00  |
| (C)16hr(+) | Ch | SEEL    | P33993     | DNA replication licensing factor MCM7                          | MCM7    | 13 | 22,95 | 39  | 39,00  |
| (C)16hr(+) | Ch | SEEL    | Q9P1T7     | MyoD family inhibitor domain-containing protein                | MDFIC   | 3  | 17,07 | 5   | 5,00   |
| (C)16hr(+) | Ch | SEEL    | Q9H1U4     | Multiple epidermal growth factor-like domains protein 9        | MEGF9   | 6  | 12,29 | 22  | 22,00  |
| (C)16hr(+) | Ch | SEEL    | P08581     | Hepatocyte growth factor receptor                              | MET     | 25 | 20,72 | 120 | 120,00 |
| (C)16hr(+) | Ch | SEEL    | P08581     | Hepatocyte growth factor receptor                              | MET     | 20 | 13,60 | 98  | 98,00  |
| (C)16hr(+) | Ch | SEEL    | P08582     | Melanotransferrin                                              | MF12    | 6  | 8,94  | 13  | 13,00  |
| (C)16hr(+) | Ch | SEEL    | O60291     | E3 ubiquitin-protein ligase MGRN1                              | MGRN1   | 6  | 13,59 | 32  | 32,00  |
| (C)16hr(+) | Ch | SEEL    | A0A0235GAB | Truncated MHC class I polypeptide-related protein A (Fragment) | MICA    | 4  | 11,36 | 27  | 27,00  |
| (C)16hr(+) | Ch | SEEL    | Q8IVT2     | Mitotic interactor and substrate of PLK1                       | MISP    | 2  | 4,71  | 4   | 4,00   |
| (C)16hr(+) | Ch | SEEL    | O95297     | Myelin protein zero-like protein 1                             | MPZL1   | 2  | 8,92  | 7   | 7,00   |
| (C)16hr(+) | Ch | SEEL    | P43246     | DNA mismatch repair protein Msh2                               | MSH2    | 4  | 4,71  | 6   | 6,00   |
| (C)16hr(+) | Ch | Control | Q86UE4     | Protein LYRIC                                                  | MTDH    | 2  | 4,64  | 4   | 4,00   |
| (C)16hr(+) | Ch | SEEL    | Q86UE4     | Protein LYRIC                                                  | MTDH    | 2  | 4,64  | 5   | 5,00   |
| (C)16hr(+) | Ch | Control | P11586     | C-1-tetrahydrofolate synthase, cytoplasmic                     | MTHFD1  | 7  | 8,45  | 13  | 13,00  |
| (C)16hr(+) | Ch | SEEL    | P11586     | C-1-tetrahydrofolate synthase, cytoplasmic                     | MTHFD1  | 13 | 14,87 | 34  | 34,00  |
| (C)16hr(+) | Ch | Control | Q6UB35     | Monofunctional C1-tetrahydrofolate synthase, mitochondrial     | MTHFD1L | 7  | 6,75  | 11  | 11,00  |
| (C)16hr(+) | Ch | SEEL    | P15941     | Mucin-1                                                        | MUC1    | 2  | 1,75  | 21  | 21,00  |
| (C)16hr(+) | Ch | Control | Q8WXI7     | Mucin-16                                                       | MUC16   | 4  | 0,24  | 12  | 12,00  |
| (C)16hr(+) | Ch | SEEL    | Q8WXI7     | Mucin-16                                                       | MUC16   | 15 | 0,77  | 99  | 99,00  |
| (C)16hr(+) | Ch | SEEL    | Q8WXI7     | Mucin-16                                                       | MUC16   | 8  | 0,39  | 15  | 15,00  |
| (C)16hr(+) | Ch | SEEL    | Q99102     | Mucin-4                                                        | MUC4    | 2  | 1,11  | 6   | 6,00   |
| (C)16hr(+) | Ch | Control | Q14764     | Major vault protein                                            | MVP     | 17 | 23,18 | 48  | 48,00  |
| (C)16hr(+) | Ch | SEEL    | Q14764     | Major vault protein                                            | MVP     | 4  | 4,48  | 8   | 8,00   |

|             |         |        |                                                     |         |    |       |     |        |
|-------------|---------|--------|-----------------------------------------------------|---------|----|-------|-----|--------|
| (C)16hr(+Ch | Control | Q9BQGO | Myb-binding protein 1A                              | MYBBP1A | 6  | 4,44  | 12  | 12,00  |
| (C)16hr(+Ch | SEEL    | Q9BQGO | Myb-binding protein 1A                              | MYBBP1A | 9  | 7,76  | 18  | 18,00  |
| (C)16hr(+Ch | Control | P35580 | Myosin-10                                           | MYH10   | 7  | 3,80  | 15  | 15,00  |
| (C)16hr(+Ch | Control | P35579 | Myosin-9                                            | MYH9    | 18 | 9,85  | 43  | 43,00  |
| (C)16hr(+Ch | Control | P35579 | Myosin-9                                            | MYH9    | 42 | 20,51 | 173 | 173,00 |
| (C)16hr(+Ch | SEEL    | P35579 | Myosin-9                                            | MYH9    | 5  | 3,06  | 13  | 13,00  |
| (C)16hr(+Ch | SEEL    | P35579 | Myosin-9                                            | MYH9    | 25 | 15,10 | 76  | 76,00  |
| (C)16hr(+Ch | Control | Q43795 | Unconventional myosin-Ib                            | MYO1B   | 6  | 5,90  | 17  | 17,00  |
| (C)16hr(+Ch | SEEL    | O00159 | Unconventional myosin-Ic                            | MYO1C   | 10 | 10,63 | 21  | 21,00  |
| (C)16hr(+Ch | Control | Q12965 | Unconventional myosin-Ie                            | MYO1E   | 12 | 11,82 | 28  | 28,00  |
| (C)16hr(+Ch | SEEL    | Q12965 | Unconventional myosin-Ie                            | MYO1E   | 8  | 8,21  | 21  | 21,00  |
| (C)16hr(+Ch | Control | Q9NZM1 | Myoferlin                                           | MYOF    | 3  | 1,75  | 5   | 5,00   |
| (C)16hr(+Ch | SEEL    | Q9NZM1 | Myoferlin                                           | MYOF    | 19 | 10,53 | 36  | 36,00  |
| (C)16hr(+Ch | SEEL    | Q9NZM1 | Myoferlin                                           | MYOF    | 62 | 33,82 | 271 | 271,00 |
| (C)16hr(+Ch | SEEL    | Q9NZM1 | Myoferlin                                           | MYOF    | 6  | 3,30  | 13  | 13,00  |
| (C)16hr(+Ch | Control | Q9H0A0 | N-acetyltransferase 10                              | NAT10   | 16 | 14,44 | 47  | 47,00  |
| (C)16hr(+Ch | SEEL    | Q9H0A0 | N-acetyltransferase 10                              | NAT10   | 6  | 6,15  | 13  | 13,00  |
| (C)16hr(+Ch | Control | P19338 | Nucleolin                                           | NCL     | 10 | 14,65 | 34  | 34,00  |
| (C)16hr(+Ch | SEEL    | P19338 | Nucleolin                                           | NCL     | 7  | 11,41 | 16  | 16,00  |
| (C)16hr(+Ch | SEEL    | Q68D85 | Natural cytotoxicity triggering receptor 3 ligand 1 | NCR3LG1 | 8  | 19,60 | 32  | 32,00  |
| (C)16hr(+Ch | SEEL    | Q92542 | Nicastrin                                           | NCSTN   | 9  | 13,54 | 57  | 57,00  |
| (C)16hr(+Ch | SEEL    | Q92542 | Nicastrin                                           | NCSTN   | 14 | 21,86 | 165 | 165,00 |
| (C)16hr(+Ch | SEEL    | Q92542 | Nicastrin                                           | NCSTN   | 2  | 4,65  | 4   | 4,00   |
| (C)16hr(+Ch | SEEL    | Q92859 | Neogenin                                            | NEO1    | 6  | 5,27  | 15  | 15,00  |
| (C)16hr(+Ch | Control | Q13423 | NAD(P) transhydrogenase, mitochondrial              | NNT     | 4  | 3,87  | 5   | 5,00   |
| (C)16hr(+Ch | Control | Q15233 | Non-POU domain-containing octamer-binding protein   | NONO    | 2  | 4,03  | 3   | 3,00   |
| (C)16hr(+Ch | SEEL    | Q15233 | Non-POU domain-containing octamer-binding protein   | NONO    | 3  | 6,58  | 8   | 8,00   |
| (C)16hr(+Ch | Control | O00567 | Nucleolar protein 56                                | NOP56   | 9  | 14,98 | 37  | 37,00  |
| (C)16hr(+Ch | SEEL    | O00567 | Nucleolar protein 56                                | NOP56   | 7  | 11,78 | 24  | 24,00  |
| (C)16hr(+Ch | Control | Q9Y2X3 | Nucleolar protein 58                                | NOP58   | 5  | 11,72 | 14  | 14,00  |
| (C)16hr(+Ch | SEEL    | Q9Y2X3 | Nucleolar protein 58                                | NOP58   | 5  | 11,72 | 15  | 15,00  |
| (C)16hr(+Ch | SEEL    | Q04721 | Neurogenic locus notch homolog protein 2            | NOTCH2  | 9  | 3,64  | 32  | 32,00  |
| (C)16hr(+Ch | SEEL    | Q04721 | Neurogenic locus notch homolog protein 2            | NOTCH2  | 12 | 4,73  | 43  | 43,00  |
| (C)16hr(+Ch | SEEL    | Q04721 | Neurogenic locus notch homolog protein 2            | NOTCH2  | 6  | 2,23  | 20  | 20,00  |
| (C)16hr(+Ch | Control | P55786 | Puromycin-sensitive aminopeptidase                  | NPEPPS  | 4  | 4,46  | 7   | 7,00   |
| (C)16hr(+Ch | SEEL    | P55786 | Puromycin-sensitive aminopeptidase                  | NPEPPS  | 2  | 2,72  | 2   | 2,00   |
| (C)16hr(+Ch | SEEL    | P16066 | Atrial natriuretic peptide receptor 1               | NPR1    | 15 | 16,59 | 40  | 40,00  |
| (C)16hr(+Ch | SEEL    | P17342 | Atrial natriuretic peptide receptor 3               | NPR3    | 6  | 13,12 | 20  | 20,00  |
| (C)16hr(+Ch | SEEL    | Q9Y639 | Neuroplastin                                        | NPTN    | 8  | 20,10 | 43  | 43,00  |
| (C)16hr(+Ch | SEEL    | Q9Y639 | Neuroplastin                                        | NPTN    | 8  | 20,10 | 83  | 83,00  |
| (C)16hr(+Ch | SEEL    | Q92823 | Neuronal cell adhesion molecule                     | NRCAM   | 2  | 2,15  | 6   | 6,00   |
| (C)16hr(+Ch | SEEL    | O14786 | Neuropilin-1                                        | NRP1    | 6  | 8,34  | 16  | 16,00  |
| (C)16hr(+Ch | SEEL    | O14786 | Neuropilin-1                                        | NRP1    | 4  | 7,04  | 11  | 11,00  |
| (C)16hr(+Ch | SEEL    | O14786 | Neuropilin-1                                        | NRP1    | 2  | 3,79  | 6   | 6,00   |
| (C)16hr(+Ch | Control | Q08J23 | tRNA (cytosine(34)-C(5))-methyltransferase          | NSUN2   | 11 | 17,08 | 34  | 34,00  |
| (C)16hr(+Ch | SEEL    | Q08J23 | tRNA (cytosine(34)-C(5))-methyltransferase          | NSUN2   | 11 | 15,91 | 33  | 33,00  |
| (C)16hr(+Ch | SEEL    | P21589 | 5'-nucleotidase                                     | NT5E    | 10 | 20,21 | 31  | 31,00  |
| (C)16hr(+Ch | Control | Q14980 | Nuclear mitotic apparatus protein 1                 | NUMA1   | 2  | 1,32  | 4   | 4,00   |
| (C)16hr(+Ch | Control | Q14980 | Nuclear mitotic apparatus protein 1                 | NUMA1   | 16 | 8,09  | 40  | 40,00  |
| (C)16hr(+Ch | SEEL    | Q14980 | Nuclear mitotic apparatus protein 1                 | NUMA1   | 9  | 4,78  | 22  | 22,00  |
| (C)16hr(+Ch | SEEL    | Q14980 | Nuclear mitotic apparatus protein 1                 | NUMA1   | 32 | 18,06 | 70  | 70,00  |
| (C)16hr(+Ch | Control | Q12769 | Nuclear pore complex protein Nup160                 | NUP160  | 5  | 3,34  | 14  | 14,00  |
| (C)16hr(+Ch | SEEL    | Q12769 | Nuclear pore complex protein Nup160                 | NUP160  | 2  | 1,46  | 5   | 5,00   |
| (C)16hr(+Ch | Control | Q5SRE5 | Nucleoporin NUP188 homolog                          | NUP188  | 2  | 1,66  | 2   | 2,00   |
| (C)16hr(+Ch | Control | Q92621 | Nuclear pore complex protein Nup205                 | NUP205  | 7  | 3,73  | 16  | 16,00  |
| (C)16hr(+Ch | SEEL    | Q92621 | Nuclear pore complex protein Nup205                 | NUP205  | 4  | 2,14  | 8   | 8,00   |
| (C)16hr(+Ch | Control | Q8TEM1 | Nuclear pore membrane glycoprotein 210              | NUP210  | 17 | 9,06  | 50  | 50,00  |
| (C)16hr(+Ch | SEEL    | Q8TEM1 | Nuclear pore membrane glycoprotein 210              | NUP210  | 10 | 5,51  | 18  | 18,00  |
| (C)16hr(+Ch | SEEL    | Q8TEM1 | Nuclear pore membrane glycoprotein 210              | NUP210  | 19 | 11,55 | 48  | 48,00  |
| (C)16hr(+Ch | Control | Q8N1F7 | Nuclear pore complex protein Nup93                  | NUP93   | 17 | 21,12 | 55  | 55,00  |
| (C)16hr(+Ch | SEEL    | Q8N1F7 | Nuclear pore complex protein Nup93                  | NUP93   | 10 | 14,41 | 24  | 24,00  |
| (C)16hr(+Ch | Control | Q9UBU9 | Nuclear RNA export factor 1                         | NXF1    | 6  | 10,18 | 17  | 17,00  |
| (C)16hr(+Ch | SEEL    | Q9UBU9 | Nuclear RNA export factor 1                         | NXF1    | 5  | 8,56  | 12  | 12,00  |
| (C)16hr(+Ch | Control | Q02218 | 2-oxoglutarate dehydrogenase, mitochondrial         | OGDH    | 17 | 16,23 | 62  | 62,00  |
| (C)16hr(+Ch | Control | Q02218 | 2-oxoglutarate dehydrogenase, mitochondrial         | OGDH    | 52 | 45,26 | 797 | 797,00 |
| (C)16hr(+Ch | Control | Q02218 | 2-oxoglutarate dehydrogenase, mitochondrial         | OGDH    | 16 | 16,23 | 54  | 54,00  |

|             |         |        |                                                                                |         |    |       |      |         |
|-------------|---------|--------|--------------------------------------------------------------------------------|---------|----|-------|------|---------|
| (C)16hr(+Ch | Control | Q9ULD0 | 2-oxoglutarate dehydrogenase-like, mitochondrial                               | OGDHL   | 3  | 2,77  | 5    | 5,00    |
| (C)16hr(+Ch | SEEL    | Q99650 | Oncostatin-M-specific receptor subunit beta                                    | OSMR    | 8  | 10,93 | 19   | 19,00   |
| (C)16hr(+Ch | SEEL    | Q93086 | P2X purinoceptor 5                                                             | P2RX5   | 2  | 5,69  | 5    | 5,00    |
| (C)16hr(+Ch | Control | P11940 | Polyadenylate-binding protein 1                                                | PABPC1  | 13 | 23,43 | 34   | 34,00   |
| (C)16hr(+Ch | SEEL    | P11940 | Polyadenylate-binding protein 1                                                | PABPC1  | 5  | 9,59  | 12   | 12,00   |
| (C)16hr(+Ch | Control | P11498 | Pyruvate carboxylase, mitochondrial                                            | PC      | 40 | 40,58 | 293  | 293,00  |
| (C)16hr(+Ch | Control | P11498 | Pyruvate carboxylase, mitochondrial                                            | PC      | 57 | 49,92 | 1027 | 1027,00 |
| (C)16hr(+Ch | Control | P11498 | Pyruvate carboxylase, mitochondrial                                            | PC      | 83 | 69,69 | 3744 | 3744,00 |
| (C)16hr(+Ch | Control | P11498 | Pyruvate carboxylase, mitochondrial                                            | PC      | 47 | 44,40 | 379  | 379,00  |
| (C)16hr(+Ch | SEEL    | P11498 | Pyruvate carboxylase, mitochondrial                                            | PC      | 40 | 39,39 | 282  | 282,00  |
| (C)16hr(+Ch | SEEL    | P11498 | Pyruvate carboxylase, mitochondrial                                            | PC      | 59 | 54,58 | 701  | 701,00  |
| (C)16hr(+Ch | SEEL    | P11498 | Pyruvate carboxylase, mitochondrial                                            | PC      | 76 | 71,82 | 2014 | 2014,00 |
| (C)16hr(+Ch | SEEL    | P11498 | Pyruvate carboxylase, mitochondrial                                            | PC      | 28 | 32,85 | 195  | 195,00  |
| (C)16hr(+Ch | Control | P05165 | Propionyl-CoA carboxylase alpha chain, mitochondrial                           | PCCA    | 6  | 8,52  | 16   | 16,00   |
| (C)16hr(+Ch | Control | P05165 | Propionyl-CoA carboxylase alpha chain, mitochondrial                           | PCCA    | 10 | 14,70 | 31   | 31,00   |
| (C)16hr(+Ch | Control | P05165 | Propionyl-CoA carboxylase alpha chain, mitochondrial                           | PCCA    | 50 | 61,81 | 787  | 787,00  |
| (C)16hr(+Ch | SEEL    | P05165 | Propionyl-CoA carboxylase alpha chain, mitochondrial                           | PCCA    | 5  | 8,10  | 11   | 11,00   |
| (C)16hr(+Ch | SEEL    | P05165 | Propionyl-CoA carboxylase alpha chain, mitochondrial                           | PCCA    | 6  | 7,01  | 14   | 14,00   |
| (C)16hr(+Ch | SEEL    | P05165 | Propionyl-CoA carboxylase alpha chain, mitochondrial                           | PCCA    | 43 | 58,10 | 448  | 448,00  |
| (C)16hr(+Ch | SEEL    | P05166 | Propionyl-CoA carboxylase beta chain, mitochondrial                            | PCCB    | 4  | 10,39 | 10   | 10,00   |
| (C)16hr(+Ch | SEEL    | O60245 | Protocadherin-7                                                                | PCDH7   | 17 | 20,39 | 78   | 78,00   |
| (C)16hr(+Ch | SEEL    | O60245 | Protocadherin-7                                                                | PCDH7   | 15 | 18,15 | 111  | 111,00  |
| (C)16hr(+Ch | SEEL    | O60245 | Protocadherin-7                                                                | PCDH7   | 2  | 2,71  | 5    | 5,00    |
| (C)16hr(+Ch | SEEL    | Q9H6A9 | Pecanex-like protein 3                                                         | PCNXL3  | 4  | 2,31  | 8    | 8,00    |
| (C)16hr(+Ch | Control | Q8WUM4 | Programmed cell death 6-interacting protein                                    | PDCD6IP | 2  | 3,34  | 3    | 3,00    |
| (C)16hr(+Ch | SEEL    | Q8WUM4 | Programmed cell death 6-interacting protein                                    | PDCD6IP | 29 | 39,75 | 113  | 113,00  |
| (C)16hr(+Ch | Control | P08559 | Pyruvate dehydrogenase E1 component subunit alpha, somatic form, mitochondrial | PDHA1   | 7  | 14,36 | 25   | 25,00   |
| (C)16hr(+Ch | Control | P08559 | Pyruvate dehydrogenase E1 component subunit alpha, somatic form, mitochondrial | PDHA1   | 4  | 10,26 | 12   | 12,00   |
| (C)16hr(+Ch | Control | O00330 | Pyruvate dehydrogenase protein X component, mitochondrial                      | PDHX    | 2  | 3,39  | 6    | 6,00    |
| (C)16hr(+Ch | Control | O00330 | Pyruvate dehydrogenase protein X component, mitochondrial                      | PDHX    | 3  | 6,19  | 7    | 7,00    |
| (C)16hr(+Ch | SEEL    | O00541 | Pescadillo homolog                                                             | PES1    | 3  | 5,27  | 6    | 6,00    |
| (C)16hr(+Ch | SEEL    | P08237 | ATP-dependent 6-phosphofructokinase, muscle type                               | PFKM    | 3  | 3,21  | 5    | 5,00    |
| (C)16hr(+Ch | SEEL    | M4QHP2 | PIEZO1                                                                         | PIEZO1  | 3  | 1,79  | 37   | 37,00   |
| (C)16hr(+Ch | SEEL    | Q92508 | Piezo-type mechanosensitive ion channel component 1                            | PIEZO1  | 4  | 1,82  | 53   | 53,00   |
| (C)16hr(+Ch | SEEL    | Q92508 | Piezo-type mechanosensitive ion channel component 1                            | PIEZO1  | 20 | 10,87 | 57   | 57,00   |
| (C)16hr(+Ch | SEEL    | Q9H5I5 | Piezo-type mechanosensitive ion channel component 2                            | PIEZO2  | 18 | 6,94  | 47   | 47,00   |
| (C)16hr(+Ch | Control | P14618 | Pyruvate kinase PKM                                                            | PKM     | 24 | 48,40 | 152  | 152,00  |
| (C)16hr(+Ch | SEEL    | P14618 | Pyruvate kinase PKM                                                            | PKM     | 12 | 26,74 | 28   | 28,00   |
| (C)16hr(+Ch | SEEL    | P14618 | Pyruvate kinase PKM                                                            | PKM     | 10 | 27,12 | 31   | 31,00   |
| (C)16hr(+Ch | SEEL    | P14618 | Pyruvate kinase PKM                                                            | PKM     | 10 | 25,80 | 39   | 39,00   |
| (C)16hr(+Ch | SEEL    | P14618 | Pyruvate kinase PKM                                                            | PKM     | 26 | 53,67 | 182  | 182,00  |
| (C)16hr(+Ch | Control | Q99959 | Plakophilin-2                                                                  | PKP2    | 6  | 8,06  | 10   | 10,00   |
| (C)16hr(+Ch | SEEL    | Q99959 | Plakophilin-2                                                                  | PKP2    | 6  | 6,92  | 11   | 11,00   |
| (C)16hr(+Ch | SEEL    | Q8IV08 | Phospholipase D3                                                               | PLD3    | 4  | 7,35  | 10   | 10,00   |
| (C)16hr(+Ch | Control | Q15149 | Plectin                                                                        | PLEC    | 93 | 20,47 | 266  | 266,00  |
| (C)16hr(+Ch | Control | Q15149 | Plectin                                                                        | PLEC    | 66 | 14,39 | 206  | 206,00  |
| (C)16hr(+Ch | Control | Q15149 | Plectin                                                                        | PLEC    | 3  | 0,96  | 3    | 3,00    |
| (C)16hr(+Ch | SEEL    | Q15149 | Plectin                                                                        | PLEC    | 96 | 22,20 | 270  | 270,00  |
| (C)16hr(+Ch | SEEL    | Q15149 | Plectin                                                                        | PLEC    | 34 | 8,45  | 92   | 92,00   |
| (C)16hr(+Ch | Control | P53350 | Serine/threonine-protein kinase PLK1                                           | PLK1    | 2  | 4,48  | 5    | 5,00    |
| (C)16hr(+Ch | SEEL    | O00469 | Procollagen-lysine,2-oxoglutarate 5-dioxygenase 2                              | PLOD2   | 6  | 9,91  | 16   | 16,00   |
| (C)16hr(+Ch | SEEL    | Q9UIW2 | Plexin-A1                                                                      | PLXNA1  | 47 | 28,80 | 268  | 268,00  |
| (C)16hr(+Ch | SEEL    | O75051 | Plexin-A2                                                                      | PLXNA2  | 2  | 1,06  | 5    | 5,00    |
| (C)16hr(+Ch | SEEL    | O43157 | Plexin-B1                                                                      | PLXNB1  | 7  | 4,92  | 26   | 26,00   |
| (C)16hr(+Ch | SEEL    | O43157 | Plexin-B1                                                                      | PLXNB1  | 20 | 11,05 | 62   | 62,00   |
| (C)16hr(+Ch | SEEL    | O43157 | Plexin-B1                                                                      | PLXNB1  | 5  | 2,67  | 20   | 20,00   |
| (C)16hr(+Ch | SEEL    | O15031 | Plexin-B2                                                                      | PLXNB2  | 3  | 2,07  | 7    | 7,00    |
| (C)16hr(+Ch | SEEL    | O15031 | Plexin-B2                                                                      | PLXNB2  | 23 | 15,29 | 182  | 182,00  |
| (C)16hr(+Ch | SEEL    | O15031 | Plexin-B2                                                                      | PLXNB2  | 19 | 10,66 | 45   | 45,00   |
| (C)16hr(+Ch | SEEL    | O15031 | Plexin-B2                                                                      | PLXNB2  | 35 | 19,10 | 344  | 344,00  |
| (C)16hr(+Ch | SEEL    | Q9Y4D7 | Plexin-D1                                                                      | PLXND1  | 3  | 1,87  | 5    | 5,00    |
| (C)16hr(+Ch | SEEL    | Q9Y4D7 | Plexin-D1                                                                      | PLXND1  | 21 | 14,34 | 97   | 97,00   |
| (C)16hr(+Ch | SEEL    | O00592 | Podocalyxin                                                                    | PODXL   | 8  | 14,87 | 55   | 55,00   |
| (C)16hr(+Ch | SEEL    | O00592 | Podocalyxin                                                                    | PODXL   | 16 | 26,88 | 275  | 275,00  |
| (C)16hr(+Ch | SEEL    | O00592 | Podocalyxin                                                                    | PODXL   | 7  | 12,54 | 28   | 28,00   |
| (C)16hr(+Ch | SEEL    | O00592 | Podocalyxin                                                                    | PODXL   | 6  | 11,29 | 38   | 38,00   |

|             |         |        |                                                         |         |    |       |     |        |
|-------------|---------|--------|---------------------------------------------------------|---------|----|-------|-----|--------|
| (C)16hr(+Ch | SEEL    | Q9NZ53 | Podocalyxin-like protein 2                              | PODXL2  | 2  | 4,79  | 2   | 2,00   |
| (C)16hr(+Ch | SEEL    | Q6S8J3 | POTE ankyrin domain family member E                     | POTEE   | 2  | 3,72  | 2   | 2,00   |
| (C)16hr(+Ch | SEEL    | A5A3E0 | POTE ankyrin domain family member F                     | POTEF   | 3  | 4,74  | 3   | 3,00   |
| (C)16hr(+Ch | Control | P78527 | DNA-dependent protein kinase catalytic subunit          | PRKDC   | 48 | 11,94 | 116 | 116,00 |
| (C)16hr(+Ch | Control | P78527 | DNA-dependent protein kinase catalytic subunit          | PRKDC   | 16 | 3,88  | 27  | 27,00  |
| (C)16hr(+Ch | SEEL    | P78527 | DNA-dependent protein kinase catalytic subunit          | PRKDC   | 97 | 23,16 | 349 | 349,00 |
| (C)16hr(+Ch | SEEL    | P78527 | DNA-dependent protein kinase catalytic subunit          | PRKDC   | 6  | 1,82  | 10  | 10,00  |
| (C)16hr(+Ch | Control | Q13523 | Serine/threonine-protein kinase PRP4 homolog            | PRPF4B  | 11 | 12,31 | 38  | 38,00  |
| (C)16hr(+Ch | Control | Q13523 | Serine/threonine-protein kinase PRP4 homolog            | PRPF4B  | 18 | 14,90 | 73  | 73,00  |
| (C)16hr(+Ch | Control | Q13523 | Serine/threonine-protein kinase PRP4 homolog            | PRPF4B  | 5  | 4,77  | 11  | 11,00  |
| (C)16hr(+Ch | Control | Q13523 | Serine/threonine-protein kinase PRP4 homolog            | PRPF4B  | 2  | 2,09  | 7   | 7,00   |
| (C)16hr(+Ch | SEEL    | Q13523 | Serine/threonine-protein kinase PRP4 homolog            | PRPF4B  | 5  | 4,27  | 14  | 14,00  |
| (C)16hr(+Ch | SEEL    | Q13523 | Serine/threonine-protein kinase PRP4 homolog            | PRPF4B  | 8  | 9,43  | 27  | 27,00  |
| (C)16hr(+Ch | Control | O94906 | Pre-mRNA-processing factor 6                            | PRPF6   | 8  | 8,71  | 13  | 13,00  |
| (C)16hr(+Ch | Control | Q6P2Q9 | Pre-mRNA-processing-splicing factor 8                   | PRPF8   | 17 | 6,77  | 51  | 51,00  |
| (C)16hr(+Ch | Control | Q5JSZ5 | Protein PRRC2B                                          | PRRC2B  | 2  | 1,03  | 16  | 16,00  |
| (C)16hr(+Ch | SEEL    | P0CW18 | Serine protease 56                                      | PRSS56  | 5  | 8,62  | 15  | 15,00  |
| (C)16hr(+Ch | Control | Q13200 | 26S proteasome non-ATPase regulatory subunit 2          | PSMD2   | 7  | 9,03  | 22  | 22,00  |
| (C)16hr(+Ch | SEEL    | Q13200 | 26S proteasome non-ATPase regulatory subunit 2          | PSMD2   | 10 | 14,32 | 30  | 30,00  |
| (C)16hr(+Ch | Control | O43242 | 26S proteasome non-ATPase regulatory subunit 3          | PSMD3   | 18 | 35,77 | 60  | 60,00  |
| (C)16hr(+Ch | SEEL    | O43242 | 26S proteasome non-ATPase regulatory subunit 3          | PSMD3   | 13 | 24,72 | 44  | 44,00  |
| (C)16hr(+Ch | SEEL    | Q9P2B2 | Prostaglandin F2 receptor negative regulator            | PTGFRN  | 5  | 4,89  | 11  | 11,00  |
| (C)16hr(+Ch | SEEL    | Q9P2B2 | Prostaglandin F2 receptor negative regulator            | PTGFRN  | 4  | 3,53  | 33  | 33,00  |
| (C)16hr(+Ch | SEEL    | Q9P2B2 | Prostaglandin F2 receptor negative regulator            | PTGFRN  | 5  | 4,55  | 51  | 51,00  |
| (C)16hr(+Ch | SEEL    | Q9P2B2 | Prostaglandin F2 receptor negative regulator            | PTGFRN  | 9  | 10,01 | 24  | 24,00  |
| (C)16hr(+Ch | SEEL    | Q13308 | Inactive tyrosine-protein kinase 7                      | PTK7    | 7  | 6,92  | 17  | 17,00  |
| (C)16hr(+Ch | SEEL    | Q9P035 | Very-long-chain (3R)-3-hydroxyacyl-CoA dehydratase 3    | PTPLAD1 | 2  | 4,42  | 6   | 6,00   |
| (C)16hr(+Ch | SEEL    | Q9P035 | Very-long-chain (3R)-3-hydroxyacyl-CoA dehydratase 3    | PTPLAD1 | 2  | 9,67  | 3   | 3,00   |
| (C)16hr(+Ch | SEEL    | P18433 | Receptor-type tyrosine-protein phosphatase alpha        | PTPRA   | 26 | 36,28 | 121 | 121,00 |
| (C)16hr(+Ch | SEEL    | P10586 | Receptor-type tyrosine-protein phosphatase F            | PTPRF   | 31 | 20,40 | 226 | 226,00 |
| (C)16hr(+Ch | SEEL    | P10586 | Receptor-type tyrosine-protein phosphatase F            | PTPRF   | 37 | 26,32 | 242 | 242,00 |
| (C)16hr(+Ch | SEEL    | P10586 | Receptor-type tyrosine-protein phosphatase F            | PTPRF   | 17 | 11,59 | 80  | 80,00  |
| (C)16hr(+Ch | SEEL    | P23470 | Receptor-type tyrosine-protein phosphatase gamma        | PTPRG   | 23 | 19,79 | 98  | 98,00  |
| (C)16hr(+Ch | SEEL    | Q12913 | Receptor-type tyrosine-protein phosphatase eta          | PTPRJ   | 10 | 10,32 | 29  | 29,00  |
| (C)16hr(+Ch | SEEL    | Q12913 | Receptor-type tyrosine-protein phosphatase eta          | PTPRJ   | 26 | 23,78 | 149 | 149,00 |
| (C)16hr(+Ch | SEEL    | E9PGC5 | Receptor-type tyrosine-protein phosphatase kappa        | PTPRK   | 13 | 10,94 | 36  | 36,00  |
| (C)16hr(+Ch | SEEL    | Q13332 | Receptor-type tyrosine-protein phosphatase S            | PTPRS   | 12 | 9,75  | 55  | 55,00  |
| (C)16hr(+Ch | SEEL    | Q13332 | Receptor-type tyrosine-protein phosphatase S            | PTPRS   | 12 | 10,63 | 47  | 47,00  |
| (C)16hr(+Ch | SEEL    | Q13332 | Receptor-type tyrosine-protein phosphatase S            | PTPRS   | 3  | 3,13  | 7   | 7,00   |
| (C)16hr(+Ch | Control | Q9UHX1 | Poly(U)-binding-splicing factor PUF60                   | PUF60   | 12 | 28,44 | 51  | 51,00  |
| (C)16hr(+Ch | SEEL    | Q9UHX1 | Poly(U)-binding-splicing factor PUF60                   | PUF60   | 9  | 19,14 | 21  | 21,00  |
| (C)16hr(+Ch | SEEL    | A8K411 | cDNA FLJ75404                                           | PVR     | 10 | 24,70 | 214 | 214,00 |
| (C)16hr(+Ch | SEEL    | P15151 | Poliovirus receptor                                     | PVR     | 5  | 12,23 | 13  | 13,00  |
| (C)16hr(+Ch | SEEL    | P15151 | Poliovirus receptor                                     | PVR     | 8  | 20,38 | 36  | 36,00  |
| (C)16hr(+Ch | SEEL    | Q15223 | Nectin-1                                                | PVRL1   | 5  | 14,12 | 11  | 11,00  |
| (C)16hr(+Ch | SEEL    | Q92692 | Nectin-2                                                | PVRL2   | 6  | 11,52 | 18  | 18,00  |
| (C)16hr(+Ch | SEEL    | Q92692 | Nectin-2                                                | PVRL2   | 3  | 6,69  | 17  | 17,00  |
| (C)16hr(+Ch | SEEL    | Q9UEI6 | Polio virus related protein 2, alpha isoform (Fragment) | PVRL2   | 2  | 4,45  | 25  | 25,00  |
| (C)16hr(+Ch | SEEL    | Q9NQS3 | Nectin-3                                                | PVRL3   | 7  | 17,67 | 14  | 14,00  |
| (C)16hr(+Ch | Control | P47897 | Glutamine--tRNA ligase                                  | QARS    | 5  | 7,10  | 10  | 10,00  |
| (C)16hr(+Ch | SEEL    | P47897 | Glutamine--tRNA ligase                                  | QARS    | 7  | 9,29  | 14  | 14,00  |
| (C)16hr(+Ch | Control | P62826 | GTP-binding nuclear protein Ran                         | RAN     | 4  | 19,44 | 9   | 9,00   |
| (C)16hr(+Ch | SEEL    | P62826 | GTP-binding nuclear protein Ran                         | RAN     | 6  | 25,00 | 18  | 18,00  |
| (C)16hr(+Ch | SEEL    | P62826 | GTP-binding nuclear protein Ran                         | RAN     | 6  | 25,00 | 25  | 25,00  |
| (C)16hr(+Ch | SEEL    | P62826 | GTP-binding nuclear protein Ran                         | RAN     | 4  | 20,83 | 11  | 11,00  |
| (C)16hr(+Ch | SEEL    | P62826 | GTP-binding nuclear protein Ran                         | RAN     | 4  | 20,83 | 16  | 16,00  |
| (C)16hr(+Ch | Control | P49792 | E3 SUMO-protein ligase RanBP2                           | RANBP2  | 8  | 2,88  | 12  | 12,00  |
| (C)16hr(+Ch | SEEL    | P49792 | E3 SUMO-protein ligase RanBP2                           | RANBP2  | 11 | 4,16  | 17  | 17,00  |
| (C)16hr(+Ch | SEEL    | P46060 | Ran GTPase-activating protein 1                         | RANGAP1 | 2  | 4,09  | 4   | 4,00   |
| (C)16hr(+Ch | Control | P54136 | Arginine--tRNA ligase, cytoplasmic                      | RARS    | 5  | 6,52  | 12  | 12,00  |
| (C)16hr(+Ch | SEEL    | P54136 | Arginine--tRNA ligase, cytoplasmic                      | RARS    | 10 | 15,76 | 27  | 27,00  |
| (C)16hr(+Ch | Control | Q726E9 | E3 ubiquitin-protein ligase RBBP6                       | RBBP6   | 8  | 4,30  | 18  | 18,00  |
| (C)16hr(+Ch | SEEL    | Q726E9 | E3 ubiquitin-protein ligase RBBP6                       | RBBP6   | 5  | 2,46  | 11  | 11,00  |
| (C)16hr(+Ch | Control | Q96PK6 | RNA-binding protein 14                                  | RBM14   | 19 | 28,10 | 99  | 99,00  |
| (C)16hr(+Ch | SEEL    | Q96PK6 | RNA-binding protein 14                                  | RBM14   | 17 | 26,76 | 75  | 75,00  |
| (C)16hr(+Ch | Control | P49756 | RNA-binding protein 25                                  | RBM25   | 3  | 4,98  | 7   | 7,00   |

|             |         |            |                                                                          |         |    |       |     |        |
|-------------|---------|------------|--------------------------------------------------------------------------|---------|----|-------|-----|--------|
| (C)16hr(+Ch | Control | Q14498     | RNA-binding protein 39                                                   | RBM39   | 5  | 11,89 | 10  | 10,00  |
| (C)16hr(+Ch | SEEL    | Q14498     | RNA-binding protein 39                                                   | RBM39   | 2  | 3,77  | 4   | 4,00   |
| (C)16hr(+Ch | SEEL    | Q8NC42     | E3 ubiquitin-protein ligase RNF149                                       | RNF149  | 4  | 10,50 | 12  | 12,00  |
| (C)16hr(+Ch | SEEL    | Q9Y6N7     | Roundabout homolog 1                                                     | ROBO1   | 14 | 10,48 | 33  | 33,00  |
| (C)16hr(+Ch | SEEL    | Q9Y6N7     | Roundabout homolog 1                                                     | ROBO1   | 40 | 28,77 | 375 | 375,00 |
| (C)16hr(+Ch | SEEL    | Q01974     | Tyrosine-protein kinase transmembrane receptor ROR2                      | ROR2    | 21 | 20,25 | 117 | 117,00 |
| (C)16hr(+Ch | SEEL    | Q01974     | Tyrosine-protein kinase transmembrane receptor ROR2                      | ROR2    | 4  | 4,77  | 11  | 11,00  |
| (C)16hr(+Ch | SEEL    | P40429     | 60S ribosomal protein L13a                                               | RPL13A  | 5  | 19,21 | 12  | 12,00  |
| (C)16hr(+Ch | SEEL    | P61313     | 60S ribosomal protein L15                                                | RPL15   | 4  | 18,14 | 18  | 18,00  |
| (C)16hr(+Ch | SEEL    | Q02543     | 60S ribosomal protein L18a                                               | RPL18A  | 4  | 25,57 | 11  | 11,00  |
| (C)16hr(+Ch | SEEL    | P46776     | 60S ribosomal protein L27a                                               | RPL27A  | 2  | 15,54 | 5   | 5,00   |
| (C)16hr(+Ch | SEEL    | P46779     | 60S ribosomal protein L28                                                | RPL28   | 2  | 16,06 | 8   | 8,00   |
| (C)16hr(+Ch | SEEL    | P36578     | 60S ribosomal protein L4                                                 | RPL4    | 2  | 5,39  | 5   | 5,00   |
| (C)16hr(+Ch | Control | P04843     | Dolichyl-diphosphooligosaccharide--protein glycosyltransferase subunit 1 | RPN1    | 15 | 26,85 | 35  | 35,00  |
| (C)16hr(+Ch | SEEL    | P04843     | Dolichyl-diphosphooligosaccharide--protein glycosyltransferase subunit 1 | RPN1    | 14 | 25,37 | 31  | 31,00  |
| (C)16hr(+Ch | Control | P04844     | Dolichyl-diphosphooligosaccharide--protein glycosyltransferase subunit 2 | RPN2    | 7  | 15,69 | 36  | 36,00  |
| (C)16hr(+Ch | SEEL    | P04844     | Dolichyl-diphosphooligosaccharide--protein glycosyltransferase subunit 2 | RPN2    | 11 | 23,93 | 49  | 49,00  |
| (C)16hr(+Ch | SEEL    | P62280     | 40S ribosomal protein S11                                                | RPS11   | 8  | 37,34 | 25  | 25,00  |
| (C)16hr(+Ch | SEEL    | P62280     | 40S ribosomal protein S11                                                | RPS11   | 5  | 27,85 | 12  | 12,00  |
| (C)16hr(+Ch | SEEL    | P15880     | 40S ribosomal protein S2                                                 | RPS2    | 4  | 13,99 | 10  | 10,00  |
| (C)16hr(+Ch | SEEL    | P15880     | 40S ribosomal protein S2                                                 | RPS2    | 7  | 23,89 | 25  | 25,00  |
| (C)16hr(+Ch | SEEL    | P15880     | 40S ribosomal protein S2                                                 | RPS2    | 5  | 17,75 | 20  | 20,00  |
| (C)16hr(+Ch | SEEL    | P62266     | 40S ribosomal protein S23                                                | RPS23   | 4  | 29,37 | 15  | 15,00  |
| (C)16hr(+Ch | SEEL    | P62266     | 40S ribosomal protein S23                                                | RPS23   | 5  | 30,07 | 10  | 10,00  |
| (C)16hr(+Ch | SEEL    | P42677     | 40S ribosomal protein S27                                                | RPS27   | 2  | 25,00 | 8   | 8,00   |
| (C)16hr(+Ch | Control | P23396     | 40S ribosomal protein S3                                                 | RPS3    | 2  | 9,05  | 5   | 5,00   |
| (C)16hr(+Ch | SEEL    | P23396     | 40S ribosomal protein S3                                                 | RPS3    | 7  | 29,22 | 22  | 22,00  |
| (C)16hr(+Ch | SEEL    | P23396     | 40S ribosomal protein S3                                                 | RPS3    | 10 | 40,33 | 29  | 29,00  |
| (C)16hr(+Ch | SEEL    | P23396     | 40S ribosomal protein S3                                                 | RPS3    | 6  | 23,05 | 15  | 15,00  |
| (C)16hr(+Ch | SEEL    | P23396     | 40S ribosomal protein S3                                                 | RPS3    | 7  | 26,75 | 22  | 22,00  |
| (C)16hr(+Ch | SEEL    | P62753     | 40S ribosomal protein S6                                                 | RPS6    | 3  | 12,85 | 10  | 10,00  |
| (C)16hr(+Ch | SEEL    | P46781     | 40S ribosomal protein S9                                                 | RPS9    | 8  | 38,66 | 24  | 24,00  |
| (C)16hr(+Ch | Control | Q9P2E9     | Ribosome-binding protein 1                                               | RRBP1   | 8  | 6,38  | 17  | 17,00  |
| (C)16hr(+Ch | Control | P23921     | Ribonucleoside-diphosphate reductase large subunit                       | RRM1    | 8  | 10,48 | 25  | 25,00  |
| (C)16hr(+Ch | SEEL    | P23921     | Ribonucleoside-diphosphate reductase large subunit                       | RRM1    | 7  | 10,35 | 25  | 25,00  |
| (C)16hr(+Ch | SEEL    | Q86UN3     | Reticulon-4 receptor-like 2                                              | RTN4RL2 | 9  | 21,19 | 42  | 42,00  |
| (C)16hr(+Ch | SEEL    | O14828     | Secretory carrier-associated membrane protein 3                          | SCAMP3  | 2  | 8,36  | 4   | 4,00   |
| (C)16hr(+Ch | SEEL    | O14828     | Secretory carrier-associated membrane protein 3                          | SCAMP3  | 4  | 13,54 | 10  | 10,00  |
| (C)16hr(+Ch | SEEL    | O14828     | Secretory carrier-associated membrane protein 3                          | SCAMP3  | 2  | 8,36  | 5   | 5,00   |
| (C)16hr(+Ch | SEEL    | AOA024RBS4 | Scavenger receptor class B, member 1, isoform CRA_b                      | SCARB1  | 7  | 11,59 | 31  | 31,00  |
| (C)16hr(+Ch | SEEL    | AOA024RBS4 | Scavenger receptor class B, member 1, isoform CRA_b                      | SCARB1  | 5  | 7,07  | 30  | 30,00  |
| (C)16hr(+Ch | SEEL    | O00767     | Acyl-CoA desaturase                                                      | SCD     | 2  | 6,96  | 8   | 8,00   |
| (C)16hr(+Ch | Control | Q14160     | Protein scribble homolog                                                 | SCRIB   | 7  | 4,29  | 12  | 12,00  |
| (C)16hr(+Ch | Control | P31040     | Succinate dehydrogenase [ubiquinone] flavoprotein subunit, mitochondrial | SDHA    | 5  | 7,53  | 19  | 19,00  |
| (C)16hr(+Ch | SEEL    | P31040     | Succinate dehydrogenase [ubiquinone] flavoprotein subunit, mitochondrial | SDHA    | 3  | 5,27  | 9   | 9,00   |
| (C)16hr(+Ch | Control | O15027     | Protein transport protein Sec16A                                         | SEC16A  | 2  | 0,96  | 5   | 5,00   |
| (C)16hr(+Ch | Control | Q15436     | Protein transport protein Sec23A                                         | SEC23A  | 2  | 3,14  | 6   | 6,00   |
| (C)16hr(+Ch | Control | P53992     | Protein transport protein Sec24C                                         | SEC24C  | 6  | 7,04  | 17  | 17,00  |
| (C)16hr(+Ch | SEEL    | Q9NRX5     | Serine incorporator 1                                                    | SERINC1 | 2  | 6,62  | 3   | 3,00   |
| (C)16hr(+Ch | SEEL    | O75533     | Splicing factor 3B subunit 1                                             | SF3B1   | 4  | 3,22  | 7   | 7,00   |
| (C)16hr(+Ch | Control | P23246     | Splicing factor, proline- and glutamine-rich                             | SFPQ    | 7  | 13,15 | 22  | 22,00  |
| (C)16hr(+Ch | SEEL    | P23246     | Splicing factor, proline- and glutamine-rich                             | SFPQ    | 4  | 6,36  | 10  | 10,00  |
| (C)16hr(+Ch | Control | Q8TF17     | SH3 domain and tetratricopeptide repeat-containing protein 2             | SH3TC2  | 3  | 3,18  | 7   | 7,00   |
| (C)16hr(+Ch | SEEL    | P78324     | Tyrosine-protein phosphatase non-receptor type substrate 1               | SIRPA   | 4  | 9,92  | 19  | 19,00  |
| (C)16hr(+Ch | SEEL    | P55011     | Solute carrier family 12 member 2                                        | SLC12A2 | 11 | 11,63 | 31  | 31,00  |
| (C)16hr(+Ch | SEEL    | P55011     | Solute carrier family 12 member 2                                        | SLC12A2 | 15 | 17,66 | 57  | 57,00  |
| (C)16hr(+Ch | SEEL    | Q9UP95     | Solute carrier family 12 member 4                                        | SLC12A4 | 2  | 1,94  | 3   | 3,00   |
| (C)16hr(+Ch | SEEL    | Q9Y666     | Solute carrier family 12 member 7                                        | SLC12A7 | 19 | 16,53 | 80  | 80,00  |
| (C)16hr(+Ch | SEEL    | Q9Y666     | Solute carrier family 12 member 7                                        | SLC12A7 | 25 | 24,56 | 198 | 198,00 |
| (C)16hr(+Ch | SEEL    | Q9Y666     | Solute carrier family 12 member 7                                        | SLC12A7 | 14 | 14,40 | 62  | 62,00  |
| (C)16hr(+Ch | Control | B4E106     | cDNA FLJ53399, highly similar to Monocarboxylate transporter 1           | SLC16A1 | 2  | 6,88  | 8   | 8,00   |
| (C)16hr(+Ch | Control | B4E106     | cDNA FLJ53399, highly similar to Monocarboxylate transporter 1           | SLC16A1 | 2  | 8,54  | 7   | 7,00   |
| (C)16hr(+Ch | Control | B4E106     | cDNA FLJ53399, highly similar to Monocarboxylate transporter 1           | SLC16A1 | 2  | 8,54  | 9   | 9,00   |
| (C)16hr(+Ch | Control | B4E106     | cDNA FLJ53399, highly similar to Monocarboxylate transporter 1           | SLC16A1 | 2  | 8,54  | 6   | 6,00   |
| (C)16hr(+Ch | SEEL    | B4E106     | cDNA FLJ53399, highly similar to Monocarboxylate transporter 1           | SLC16A1 | 3  | 11,04 | 17  | 17,00  |
| (C)16hr(+Ch | SEEL    | B4E106     | cDNA FLJ53399, highly similar to Monocarboxylate transporter 1           | SLC16A1 | 5  | 11,25 | 37  | 37,00  |



|             |         |        |                                                                   |          |    |       |      |         |
|-------------|---------|--------|-------------------------------------------------------------------|----------|----|-------|------|---------|
| (C)16hr(+Ch | SEEL    | B4E106 | cDNA FLJ53399, highly similar to Monocarboxylate transporter 1    | SLC16A1  | 5  | 11,25 | 26   | 26,00   |
| (C)16hr(+Ch | SEEL    | B4E106 | cDNA FLJ53399, highly similar to Monocarboxylate transporter 1    | SLC16A1  | 4  | 11,04 | 19   | 19,00   |
| (C)16hr(+Ch | Control | O15427 | Monocarboxylate transporter 4                                     | SLC16A3  | 4  | 8,82  | 17   | 17,00   |
| (C)16hr(+Ch | Control | O15427 | Monocarboxylate transporter 4                                     | SLC16A3  | 2  | 5,59  | 7    | 7,00    |
| (C)16hr(+Ch | Control | O15427 | Monocarboxylate transporter 4                                     | SLC16A3  | 2  | 5,59  | 9    | 9,00    |
| (C)16hr(+Ch | SEEL    | O15427 | Monocarboxylate transporter 4                                     | SLC16A3  | 5  | 10,54 | 19   | 19,00   |
| (C)16hr(+Ch | SEEL    | O15427 | Monocarboxylate transporter 4                                     | SLC16A3  | 6  | 12,04 | 32   | 32,00   |
| (C)16hr(+Ch | SEEL    | O15427 | Monocarboxylate transporter 4                                     | SLC16A3  | 4  | 9,03  | 14   | 14,00   |
| (C)16hr(+Ch | SEEL    | O15427 | Monocarboxylate transporter 4                                     | SLC16A3  | 2  | 5,59  | 10   | 10,00   |
| (C)16hr(+Ch | SEEL    | P41440 | Folate transporter 1                                              | SLC19A1  | 4  | 10,66 | 12   | 12,00   |
| (C)16hr(+Ch | SEEL    | P43007 | Neutral amino acid transporter A                                  | SLC1A4   | 4  | 7,14  | 12   | 12,00   |
| (C)16hr(+Ch | Control | Q15758 | Neutral amino acid transporter B(0)                               | SLC1A5   | 3  | 6,10  | 5    | 5,00    |
| (C)16hr(+Ch | Control | Q15758 | Neutral amino acid transporter B(0)                               | SLC1A5   | 7  | 15,16 | 24   | 24,00   |
| (C)16hr(+Ch | SEEL    | Q15758 | Neutral amino acid transporter B(0)                               | SLC1A5   | 5  | 11,65 | 19   | 19,00   |
| (C)16hr(+Ch | SEEL    | Q15758 | Neutral amino acid transporter B(0)                               | SLC1A5   | 9  | 21,81 | 47   | 47,00   |
| (C)16hr(+Ch | SEEL    | Q15758 | Neutral amino acid transporter B(0)                               | SLC1A5   | 9  | 21,81 | 53   | 53,00   |
| (C)16hr(+Ch | SEEL    | Q15758 | Neutral amino acid transporter B(0)                               | SLC1A5   | 14 | 28,10 | 109  | 109,00  |
| (C)16hr(+Ch | Control | O75746 | Calcium-binding mitochondrial carrier protein Aralar1             | SLC25A12 | 3  | 4,42  | 5    | 5,00    |
| (C)16hr(+Ch | SEEL    | O75746 | Calcium-binding mitochondrial carrier protein Aralar1             | SLC25A12 | 3  | 5,60  | 5    | 5,00    |
| (C)16hr(+Ch | Control | Q9UJS0 | Calcium-binding mitochondrial carrier protein Aralar2             | SLC25A13 | 12 | 20,00 | 47   | 47,00   |
| (C)16hr(+Ch | SEEL    | Q9UJS0 | Calcium-binding mitochondrial carrier protein Aralar2             | SLC25A13 | 13 | 22,96 | 43   | 43,00   |
| (C)16hr(+Ch | SEEL    | Q00325 | Phosphate carrier protein, mitochondrial                          | SLC25A3  | 6  | 12,98 | 33   | 33,00   |
| (C)16hr(+Ch | SEEL    | Q00325 | Phosphate carrier protein, mitochondrial                          | SLC25A3  | 7  | 16,30 | 41   | 41,00   |
| (C)16hr(+Ch | SEEL    | Q00325 | Phosphate carrier protein, mitochondrial                          | SLC25A3  | 5  | 11,05 | 20   | 20,00   |
| (C)16hr(+Ch | Control | P05141 | ADP/ATP translocase 2                                             | SLC25A5  | 3  | 11,41 | 6    | 6,00    |
| (C)16hr(+Ch | Control | P05141 | ADP/ATP translocase 2                                             | SLC25A5  | 2  | 8,05  | 3    | 3,00    |
| (C)16hr(+Ch | SEEL    | P05141 | ADP/ATP translocase 2                                             | SLC25A5  | 3  | 11,41 | 18   | 18,00   |
| (C)16hr(+Ch | SEEL    | P05141 | ADP/ATP translocase 2                                             | SLC25A5  | 3  | 11,41 | 21   | 21,00   |
| (C)16hr(+Ch | SEEL    | P05141 | ADP/ATP translocase 2                                             | SLC25A5  | 3  | 11,41 | 15   | 15,00   |
| (C)16hr(+Ch | SEEL    | P05141 | ADP/ATP translocase 2                                             | SLC25A5  | 3  | 11,41 | 12   | 12,00   |
| (C)16hr(+Ch | Control | P12236 | ADP/ATP translocase 3                                             | SLC25A6  | 2  | 8,05  | 9    | 9,00    |
| (C)16hr(+Ch | Control | P12236 | ADP/ATP translocase 3                                             | SLC25A6  | 3  | 10,74 | 6    | 6,00    |
| (C)16hr(+Ch | SEEL    | P12236 | ADP/ATP translocase 3                                             | SLC25A6  | 3  | 11,07 | 13   | 13,00   |
| (C)16hr(+Ch | SEEL    | P12236 | ADP/ATP translocase 3                                             | SLC25A6  | 2  | 8,05  | 7    | 7,00    |
| (C)16hr(+Ch | SEEL    | Q99808 | Equilibrative nucleoside transporter 1                            | SLC29A1  | 5  | 12,06 | 19   | 19,00   |
| (C)16hr(+Ch | Control | P11166 | Solute carrier family 2, facilitated glucose transporter member 1 | SLC2A1   | 2  | 6,91  | 6    | 6,00    |
| (C)16hr(+Ch | Control | P11166 | Solute carrier family 2, facilitated glucose transporter member 1 | SLC2A1   | 2  | 6,91  | 7    | 7,00    |
| (C)16hr(+Ch | SEEL    | P11166 | Solute carrier family 2, facilitated glucose transporter member 1 | SLC2A1   | 4  | 11,99 | 20   | 20,00   |
| (C)16hr(+Ch | SEEL    | P11166 | Solute carrier family 2, facilitated glucose transporter member 1 | SLC2A1   | 5  | 12,20 | 29   | 29,00   |
| (C)16hr(+Ch | SEEL    | P11166 | Solute carrier family 2, facilitated glucose transporter member 1 | SLC2A1   | 4  | 11,99 | 23   | 23,00   |
| (C)16hr(+Ch | SEEL    | P11166 | Solute carrier family 2, facilitated glucose transporter member 1 | SLC2A1   | 4  | 11,99 | 19   | 19,00   |
| (C)16hr(+Ch | SEEL    | P11169 | Solute carrier family 2, facilitated glucose transporter member 3 | SLC2A3   | 3  | 5,44  | 16   | 16,00   |
| (C)16hr(+Ch | SEEL    | P11169 | Solute carrier family 2, facilitated glucose transporter member 3 | SLC2A3   | 4  | 9,48  | 25   | 25,00   |
| (C)16hr(+Ch | SEEL    | P11169 | Solute carrier family 2, facilitated glucose transporter member 3 | SLC2A3   | 3  | 5,44  | 17   | 17,00   |
| (C)16hr(+Ch | SEEL    | Q9Y6M5 | Zinc transporter 1                                                | SLC30A1  | 4  | 8,09  | 11   | 11,00   |
| (C)16hr(+Ch | SEEL    | Q9Y6M5 | Zinc transporter 1                                                | SLC30A1  | 13 | 33,14 | 64   | 64,00   |
| (C)16hr(+Ch | SEEL    | Q9Y6M5 | Zinc transporter 1                                                | SLC30A1  | 7  | 15,98 | 25   | 25,00   |
| (C)16hr(+Ch | SEEL    | Q9Y6M5 | Zinc transporter 1                                                | SLC30A1  | 8  | 19,33 | 41   | 41,00   |
| (C)16hr(+Ch | Control | Q8TB61 | Adenosine 3'-phospho 5'-phosphosulfate transporter 1              | SLC35B2  | 3  | 6,71  | 8    | 8,00    |
| (C)16hr(+Ch | SEEL    | Q9H2H9 | Sodium-coupled neutral amino acid transporter 1                   | SLC38A1  | 4  | 7,19  | 24   | 24,00   |
| (C)16hr(+Ch | SEEL    | Q9H2H9 | Sodium-coupled neutral amino acid transporter 1                   | SLC38A1  | 7  | 10,88 | 49   | 49,00   |
| (C)16hr(+Ch | SEEL    | Q9H2H9 | Sodium-coupled neutral amino acid transporter 1                   | SLC38A1  | 7  | 10,88 | 45   | 45,00   |
| (C)16hr(+Ch | SEEL    | Q9H2H9 | Sodium-coupled neutral amino acid transporter 1                   | SLC38A1  | 6  | 9,24  | 30   | 30,00   |
| (C)16hr(+Ch | Control | Q96QD8 | Sodium-coupled neutral amino acid transporter 2                   | SLC38A2  | 3  | 9,49  | 5    | 5,00    |
| (C)16hr(+Ch | SEEL    | Q96QD8 | Sodium-coupled neutral amino acid transporter 2                   | SLC38A2  | 3  | 9,49  | 16   | 16,00   |
| (C)16hr(+Ch | SEEL    | Q96QD8 | Sodium-coupled neutral amino acid transporter 2                   | SLC38A2  | 6  | 14,23 | 48   | 48,00   |
| (C)16hr(+Ch | SEEL    | Q96QD8 | Sodium-coupled neutral amino acid transporter 2                   | SLC38A2  | 5  | 14,03 | 37   | 37,00   |
| (C)16hr(+Ch | SEEL    | Q96QD8 | Sodium-coupled neutral amino acid transporter 2                   | SLC38A2  | 4  | 10,87 | 17   | 17,00   |
| (C)16hr(+Ch | SEEL    | Q9ULF5 | Zinc transporter ZIP10                                            | SLC39A10 | 5  | 4,33  | 37   | 37,00   |
| (C)16hr(+Ch | SEEL    | Q15043 | Zinc transporter ZIP14                                            | SLC39A14 | 4  | 10,98 | 27   | 27,00   |
| (C)16hr(+Ch | SEEL    | Q15043 | Zinc transporter ZIP14                                            | SLC39A14 | 5  | 15,45 | 57   | 57,00   |
| (C)16hr(+Ch | SEEL    | Q15043 | Zinc transporter ZIP14                                            | SLC39A14 | 4  | 10,98 | 25   | 25,00   |
| (C)16hr(+Ch | SEEL    | Q15043 | Zinc transporter ZIP14                                            | SLC39A14 | 3  | 9,15  | 14   | 14,00   |
| (C)16hr(+Ch | SEEL    | Q13433 | Zinc transporter ZIP6                                             | SLC39A6  | 3  | 5,83  | 7    | 7,00    |
| (C)16hr(+Ch | SEEL    | Q13433 | Zinc transporter ZIP6                                             | SLC39A6  | 4  | 5,83  | 22   | 22,00   |
| (C)16hr(+Ch | SEEL    | F5GZS6 | 4F2 cell-surface antigen heavy chain                              | SLC3A2   | 38 | 51,92 | 1342 | 1342,00 |

|            |    |         |            |                                                                   |          |    |       |      |         |
|------------|----|---------|------------|-------------------------------------------------------------------|----------|----|-------|------|---------|
| (C)16hr(+) | Ch | Control | P08195     | 4F2 cell-surface antigen heavy chain                              | SLC3A2   | 6  | 11,43 | 15   | 15,00   |
| (C)16hr(+) | Ch | Control | P08195     | 4F2 cell-surface antigen heavy chain                              | SLC3A2   | 11 | 21,11 | 28   | 28,00   |
| (C)16hr(+) | Ch | Control | P08195     | 4F2 cell-surface antigen heavy chain                              | SLC3A2   | 19 | 29,52 | 99   | 99,00   |
| (C)16hr(+) | Ch | Control | P08195     | 4F2 cell-surface antigen heavy chain                              | SLC3A2   | 19 | 27,30 | 87   | 87,00   |
| (C)16hr(+) | Ch | SEEL    | P08195     | 4F2 cell-surface antigen heavy chain                              | SLC3A2   | 21 | 30,48 | 218  | 218,00  |
| (C)16hr(+) | Ch | SEEL    | P08195     | 4F2 cell-surface antigen heavy chain                              | SLC3A2   | 25 | 33,49 | 494  | 494,00  |
| (C)16hr(+) | Ch | SEEL    | P08195     | 4F2 cell-surface antigen heavy chain                              | SLC3A2   | 30 | 40,00 | 1101 | 1101,00 |
| (C)16hr(+) | Ch | SEEL    | Q8N370     | Large neutral amino acids transporter small subunit 4             | SLC43A2  | 6  | 10,37 | 24   | 24,00   |
| (C)16hr(+) | Ch | SEEL    | Q8N370     | Large neutral amino acids transporter small subunit 4             | SLC43A2  | 7  | 11,95 | 25   | 25,00   |
| (C)16hr(+) | Ch | SEEL    | Q8N370     | Large neutral amino acids transporter small subunit 4             | SLC43A2  | 3  | 7,03  | 7    | 7,00    |
| (C)16hr(+) | Ch | SEEL    | A0A024R798 | Solute carrier family 44, member 2, isoform CRA_b                 | SLC44A2  | 5  | 7,53  | 12   | 12,00   |
| (C)16hr(+) | Ch | SEEL    | A0A024R798 | Solute carrier family 44, member 2, isoform CRA_b                 | SLC44A2  | 10 | 14,63 | 40   | 40,00   |
| (C)16hr(+) | Ch | SEEL    | P04920     | Anion exchange protein 2                                          | SLC4A2   | 33 | 30,46 | 224  | 224,00  |
| (C)16hr(+) | Ch | SEEL    | P04920     | Anion exchange protein 2                                          | SLC4A2   | 8  | 7,98  | 27   | 27,00   |
| (C)16hr(+) | Ch | SEEL    | B5M450     | Solute carrier family 4 sodium bicarbonate cotransporter member 7 | SLC4A7   | 9  | 8,26  | 34   | 34,00   |
| (C)16hr(+) | Ch | SEEL    | Q9Y289     | Sodium-dependent multivitamin transporter                         | SLC5A6   | 4  | 7,40  | 10   | 10,00   |
| (C)16hr(+) | Ch | SEEL    | P31641     | Sodium- and chloride-dependent taurine transporter                | SLC6A6   | 4  | 7,90  | 12   | 12,00   |
| (C)16hr(+) | Ch | SEEL    | P31641     | Sodium- and chloride-dependent taurine transporter                | SLC6A6   | 7  | 11,94 | 25   | 25,00   |
| (C)16hr(+) | Ch | SEEL    | P31641     | Sodium- and chloride-dependent taurine transporter                | SLC6A6   | 8  | 12,74 | 37   | 37,00   |
| (C)16hr(+) | Ch | SEEL    | P48067     | Sodium- and chloride-dependent glycine transporter 1              | SLC6A9   | 4  | 5,67  | 14   | 14,00   |
| (C)16hr(+) | Ch | SEEL    | P30825     | High affinity cationic amino acid transporter 1                   | SLC7A1   | 3  | 4,13  | 8    | 8,00    |
| (C)16hr(+) | Ch | SEEL    | P30825     | High affinity cationic amino acid transporter 1                   | SLC7A1   | 3  | 4,13  | 9    | 9,00    |
| (C)16hr(+) | Ch | SEEL    | Q9UPY5     | Cystine/glutamate transporter                                     | SLC7A11  | 5  | 8,18  | 19   | 19,00   |
| (C)16hr(+) | Ch | SEEL    | Q9UPY5     | Cystine/glutamate transporter                                     | SLC7A11  | 4  | 8,18  | 22   | 22,00   |
| (C)16hr(+) | Ch | SEEL    | Q9UPY5     | Cystine/glutamate transporter                                     | SLC7A11  | 4  | 8,18  | 20   | 20,00   |
| (C)16hr(+) | Ch | SEEL    | Q9UPY5     | Cystine/glutamate transporter                                     | SLC7A11  | 3  | 5,99  | 12   | 12,00   |
| (C)16hr(+) | Ch | SEEL    | P52569     | Low affinity cationic amino acid transporter 2                    | SLC7A2   | 6  | 10,33 | 13   | 13,00   |
| (C)16hr(+) | Ch | Control | Q01650     | Large neutral amino acids transporter small subunit 1             | SLC7A5   | 3  | 8,09  | 7    | 7,00    |
| (C)16hr(+) | Ch | Control | Q01650     | Large neutral amino acids transporter small subunit 1             | SLC7A5   | 3  | 8,09  | 11   | 11,00   |
| (C)16hr(+) | Ch | SEEL    | Q01650     | Large neutral amino acids transporter small subunit 1             | SLC7A5   | 6  | 6,90  | 106  | 106,00  |
| (C)16hr(+) | Ch | SEEL    | Q01650     | Large neutral amino acids transporter small subunit 1             | SLC7A5   | 11 | 15,78 | 272  | 272,00  |
| (C)16hr(+) | Ch | SEEL    | Q01650     | Large neutral amino acids transporter small subunit 1             | SLC7A5   | 12 | 18,74 | 230  | 230,00  |
| (C)16hr(+) | Ch | SEEL    | Q01650     | Large neutral amino acids transporter small subunit 1             | SLC7A5   | 9  | 15,38 | 206  | 206,00  |
| (C)16hr(+) | Ch | SEEL    | Q8MH63     | Putative L-type amino acid transporter 1-like protein MLAS        | SLC7A5P1 | 2  | 21,67 | 2    | 2,00    |
| (C)16hr(+) | Ch | SEEL    | Q92536     | Y+L amino acid transporter 2                                      | SLC7A6   | 2  | 3,30  | 8    | 8,00    |
| (C)16hr(+) | Ch | SEEL    | Q92536     | Y+L amino acid transporter 2                                      | SLC7A6   | 4  | 10,29 | 21   | 21,00   |
| (C)16hr(+) | Ch | SEEL    | Q92536     | Y+L amino acid transporter 2                                      | SLC7A6   | 5  | 13,98 | 15   | 15,00   |
| (C)16hr(+) | Ch | Control | Q14683     | Structural maintenance of chromosomes protein 1A                  | SMC1A    | 6  | 4,54  | 11   | 11,00   |
| (C)16hr(+) | Ch | SEEL    | Q14683     | Structural maintenance of chromosomes protein 1A                  | SMC1A    | 6  | 4,62  | 13   | 13,00   |
| (C)16hr(+) | Ch | Control | Q9UQE7     | Structural maintenance of chromosomes protein 3                   | SMC3     | 11 | 10,11 | 20   | 20,00   |
| (C)16hr(+) | Ch | SEEL    | Q9UQE7     | Structural maintenance of chromosomes protein 3                   | SMC3     | 8  | 6,66  | 12   | 12,00   |
| (C)16hr(+) | Ch | SEEL    | Q9NTJ3     | Structural maintenance of chromosomes protein 4                   | SMC4     | 2  | 1,55  | 4    | 4,00    |
| (C)16hr(+) | Ch | SEEL    | Q92485     | Acid sphingomyelinase-like phosphodiesterase 3b                   | SMPDL3B  | 7  | 19,56 | 46   | 46,00   |
| (C)16hr(+) | Ch | Control | Q7KZF4     | Staphylococcal nuclease domain-containing protein 1               | SND1     | 3  | 3,63  | 9    | 9,00    |
| (C)16hr(+) | Ch | Control | O75643     | U5 small nuclear ribonucleoprotein 200 kDa helicase               | SNRNP200 | 14 | 5,85  | 45   | 45,00   |
| (C)16hr(+) | Ch | SEEL    | O75643     | U5 small nuclear ribonucleoprotein 200 kDa helicase               | SNRNP200 | 8  | 4,12  | 11   | 11,00   |
| (C)16hr(+) | Ch | Control | P08621     | U1 small nuclear ribonucleoprotein 70 kDa                         | SNRNP70  | 5  | 10,07 | 14   | 14,00   |
| (C)16hr(+) | Ch | SEEL    | Q96PQ0     | VPS10 domain-containing receptor SorCS2                           | SORCS2   | 15 | 13,11 | 51   | 51,00   |
| (C)16hr(+) | Ch | Control | Q13813     | Spectrin alpha chain, non-erythrocytic 1                          | SPTAN1   | 3  | 1,13  | 5    | 5,00    |
| (C)16hr(+) | Ch | Control | Q01082     | Spectrin beta chain, non-erythrocytic 1                           | SPTBN1   | 6  | 2,37  | 9    | 9,00    |
| (C)16hr(+) | Ch | SEEL    | Q13501     | Sequestosome-1                                                    | SQSTM1   | 4  | 10,68 | 14   | 14,00   |
| (C)16hr(+) | Ch | Control | Q965B4     | SRSF protein kinase 1                                             | SRPK1    | 5  | 10,23 | 11   | 11,00   |
| (C)16hr(+) | Ch | Control | Q8IYB3     | Serine/arginine repetitive matrix protein 1                       | SRRM1    | 7  | 12,06 | 26   | 26,00   |
| (C)16hr(+) | Ch | Control | Q8IYB3     | Serine/arginine repetitive matrix protein 1                       | SRRM1    | 5  | 7,08  | 20   | 20,00   |
| (C)16hr(+) | Ch | SEEL    | Q8IYB3     | Serine/arginine repetitive matrix protein 1                       | SRRM1    | 5  | 7,08  | 14   | 14,00   |
| (C)16hr(+) | Ch | SEEL    | Q8IYB3     | Serine/arginine repetitive matrix protein 1                       | SRRM1    | 3  | 5,20  | 6    | 6,00    |
| (C)16hr(+) | Ch | Control | Q9UQ35     | Serine/arginine repetitive matrix protein 2                       | SRRM2    | 51 | 23,95 | 357  | 357,00  |
| (C)16hr(+) | Ch | Control | Q9UQ35     | Serine/arginine repetitive matrix protein 2                       | SRRM2    | 8  | 4,11  | 24   | 24,00   |
| (C)16hr(+) | Ch | Control | Q9UQ35     | Serine/arginine repetitive matrix protein 2                       | SRRM2    | 6  | 2,98  | 23   | 23,00   |
| (C)16hr(+) | Ch | SEEL    | Q9UQ35     | Serine/arginine repetitive matrix protein 2                       | SRRM2    | 35 | 14,39 | 176  | 176,00  |
| (C)16hr(+) | Ch | SEEL    | Q658P3     | Metalloreductase STEAP3                                           | STEAP3   | 3  | 7,17  | 6    | 6,00    |
| (C)16hr(+) | Ch | SEEL    | Q687X5     | Metalloreductase STEAP4                                           | STEAP4   | 3  | 8,28  | 9    | 9,00    |
| (C)16hr(+) | Ch | SEEL    | Q687X5     | Metalloreductase STEAP4                                           | STEAP4   | 11 | 30,28 | 79   | 79,00   |
| (C)16hr(+) | Ch | SEEL    | Q687X5     | Metalloreductase STEAP4                                           | STEAP4   | 11 | 32,03 | 69   | 69,00   |
| (C)16hr(+) | Ch | SEEL    | Q687X5     | Metalloreductase STEAP4                                           | STEAP4   | 10 | 30,72 | 58   | 58,00   |
| (C)16hr(+) | Ch | SEEL    | P27105     | Erythrocyte band 7 integral membrane protein                      | STOM     | 5  | 21,18 | 22   | 22,00   |

|             |         |        |                                                    |          |    |       |      |         |
|-------------|---------|--------|----------------------------------------------------|----------|----|-------|------|---------|
| (C)16hr(+Ch | SEEL    | P27105 | Erythrocyte band 7 integral membrane protein       | STOM     | 5  | 22,57 | 22   | 22,00   |
| (C)16hr(+Ch | SEEL    | P27105 | Erythrocyte band 7 integral membrane protein       | STOM     | 5  | 20,14 | 15   | 15,00   |
| (C)16hr(+Ch | SEEL    | P27105 | Erythrocyte band 7 integral membrane protein       | STOM     | 4  | 17,01 | 15   | 15,00   |
| (C)16hr(+Ch | SEEL    | Q9BX79 | Stimulated by retinoic acid gene 6 protein homolog | STRA6    | 3  | 5,25  | 5    | 5,00    |
| (C)16hr(+Ch | SEEL    | Q9BX79 | Stimulated by retinoic acid gene 6 protein homolog | STRA6    | 3  | 5,25  | 11   | 11,00   |
| (C)16hr(+Ch | SEEL    | Q9BX79 | Stimulated by retinoic acid gene 6 protein homolog | STRA6    | 3  | 5,25  | 6    | 6,00    |
| (C)16hr(+Ch | Control | Q8NF91 | Nesprin-1                                          | SYNE1    | 4  | 0,55  | 19   | 19,00   |
| (C)16hr(+Ch | Control | P49848 | Transcription initiation factor TFIIID subunit 6   | TAF6     | 2  | 3,55  | 6    | 6,00    |
| (C)16hr(+Ch | Control | Q96920 | Protein TBRG4                                      | TBRG4    | 5  | 8,40  | 13   | 13,00   |
| (C)16hr(+Ch | SEEL    | Q96920 | Protein TBRG4                                      | TBRG4    | 4  | 8,56  | 8    | 8,00    |
| (C)16hr(+Ch | Control | Q13428 | Treacle protein                                    | TCOF1    | 2  | 2,49  | 6    | 6,00    |
| (C)16hr(+Ch | Control | Q13428 | Treacle protein                                    | TCOF1    | 12 | 9,14  | 41   | 41,00   |
| (C)16hr(+Ch | Control | Q13428 | Treacle protein                                    | TCOF1    | 6  | 4,57  | 10   | 10,00   |
| (C)16hr(+Ch | SEEL    | Q13428 | Treacle protein                                    | TCOF1    | 2  | 1,41  | 4    | 4,00    |
| (C)16hr(+Ch | Control | P17987 | T-complex protein 1 subunit alpha                  | TCP1     | 22 | 45,32 | 140  | 140,00  |
| (C)16hr(+Ch | SEEL    | P17987 | T-complex protein 1 subunit alpha                  | TCP1     | 4  | 9,89  | 7    | 7,00    |
| (C)16hr(+Ch | SEEL    | P17987 | T-complex protein 1 subunit alpha                  | TCP1     | 17 | 34,53 | 115  | 115,00  |
| (C)16hr(+Ch | SEEL    | Q9NZ01 | Very-long-chain enoyl-CoA reductase                | TECR     | 2  | 7,14  | 7    | 7,00    |
| (C)16hr(+Ch | SEEL    | Q9P273 | Teneurin-3                                         | TENM3    | 19 | 8,89  | 48   | 48,00   |
| (C)16hr(+Ch | SEEL    | Q9P273 | Teneurin-3                                         | TENM3    | 35 | 17,30 | 143  | 143,00  |
| (C)16hr(+Ch | SEEL    | Q9P273 | Teneurin-3                                         | TENM3    | 2  | 0,78  | 6    | 6,00    |
| (C)16hr(+Ch | SEEL    | Q6N022 | Teneurin-4                                         | TENM4    | 3  | 2,09  | 6    | 6,00    |
| (C)16hr(+Ch | Control | Q92734 | Protein TFG                                        | TFG      | 4  | 12,00 | 32   | 32,00   |
| (C)16hr(+Ch | SEEL    | Q92734 | Protein TFG                                        | TFG      | 4  | 12,00 | 19   | 19,00   |
| (C)16hr(+Ch | Control | P02786 | Transferrin receptor protein 1                     | TFRC     | 6  | 9,08  | 18   | 18,00   |
| (C)16hr(+Ch | Control | P02786 | Transferrin receptor protein 1                     | TFRC     | 6  | 9,34  | 21   | 21,00   |
| (C)16hr(+Ch | SEEL    | P02786 | Transferrin receptor protein 1                     | TFRC     | 41 | 51,97 | 626  | 626,00  |
| (C)16hr(+Ch | SEEL    | P02786 | Transferrin receptor protein 1                     | TFRC     | 48 | 58,68 | 1148 | 1148,00 |
| (C)16hr(+Ch | SEEL    | P02786 | Transferrin receptor protein 1                     | TFRC     | 53 | 62,24 | 1581 | 1581,00 |
| (C)16hr(+Ch | SEEL    | P02786 | Transferrin receptor protein 1                     | TFRC     | 36 | 50,00 | 632  | 632,00  |
| (C)16hr(+Ch | SEEL    | P07996 | Thrombospondin-1                                   | THBS1    | 7  | 7,61  | 18   | 18,00   |
| (C)16hr(+Ch | Control | Q8NI27 | THO complex subunit 2                              | THOC2    | 7  | 4,83  | 16   | 16,00   |
| (C)16hr(+Ch | SEEL    | Q8NI27 | THO complex subunit 2                              | THOC2    | 3  | 2,39  | 6    | 6,00    |
| (C)16hr(+Ch | SEEL    | Q24JP5 | Transmembrane protein 132A                         | TMEM132A | 6  | 8,99  | 15   | 15,00   |
| (C)16hr(+Ch | SEEL    | Q9UHN6 | Transmembrane protein 2                            | TMEM2    | 7  | 5,42  | 17   | 17,00   |
| (C)16hr(+Ch | SEEL    | Q9UHN6 | Transmembrane protein 2                            | TMEM2    | 50 | 36,51 | 336  | 336,00  |
| (C)16hr(+Ch | SEEL    | Q9UHN6 | Transmembrane protein 2                            | TMEM2    | 12 | 9,91  | 29   | 29,00   |
| (C)16hr(+Ch | SEEL    | Q9NV96 | Cell cycle control protein 50A                     | TMEM30A  | 7  | 19,39 | 19   | 19,00   |
| (C)16hr(+Ch | SEEL    | P57088 | Transmembrane protein 33                           | TMEM33   | 3  | 17,81 | 16   | 16,00   |
| (C)16hr(+Ch | SEEL    | P41273 | Tumor necrosis factor ligand superfamily member 9  | TNFSF9   | 4  | 14,57 | 8    | 8,00    |
| (C)16hr(+Ch | Control | Q96GM8 | Target of EGR1 protein 1                           | TOE1     | 5  | 12,55 | 16   | 16,00   |
| (C)16hr(+Ch | SEEL    | Q96GM8 | Target of EGR1 protein 1                           | TOE1     | 2  | 6,08  | 4    | 4,00    |
| (C)16hr(+Ch | Control | P11387 | DNA topoisomerase 1                                | TOP1     | 7  | 8,89  | 19   | 19,00   |
| (C)16hr(+Ch | Control | P11387 | DNA topoisomerase 1                                | TOP1     | 6  | 7,71  | 15   | 15,00   |
| (C)16hr(+Ch | Control | P11387 | DNA topoisomerase 1                                | TOP1     | 35 | 38,04 | 370  | 370,00  |
| (C)16hr(+Ch | Control | P11387 | DNA topoisomerase 1                                | TOP1     | 2  | 3,27  | 6    | 6,00    |
| (C)16hr(+Ch | SEEL    | P11387 | DNA topoisomerase 1                                | TOP1     | 29 | 34,12 | 199  | 199,00  |
| (C)16hr(+Ch | SEEL    | Q13641 | Trophoblast glycoprotein                           | TPBG     | 6  | 15,71 | 22   | 22,00   |
| (C)16hr(+Ch | Control | Q12931 | Heat shock protein 75 kDa, mitochondrial           | TRAP1    | 11 | 18,18 | 36   | 36,00   |
| (C)16hr(+Ch | SEEL    | Q12931 | Heat shock protein 75 kDa, mitochondrial           | TRAP1    | 13 | 21,59 | 52   | 52,00   |
| (C)16hr(+Ch | Control | Q6FI91 | TSPYL protein                                      | TSPYL    | 5  | 12,56 | 12   | 12,00   |
| (C)16hr(+Ch | Control | Q9H2G4 | Testis-specific Y-encoded-like protein 2           | TSPYL2   | 6  | 6,78  | 16   | 16,00   |
| (C)16hr(+Ch | SEEL    | D3DPG0 | Titin, isoform CRA_a                               | TTN      | 8  | 0,31  | 19   | 19,00   |
| (C)16hr(+Ch | Control | Q8WZ42 | Titin                                              | TTN      | 4  | 0,21  | 10   | 10,00   |
| (C)16hr(+Ch | Control | Q8WZ42 | Titin                                              | TTN      | 10 | 0,39  | 35   | 35,00   |
| (C)16hr(+Ch | Control | Q8WZ42 | Titin                                              | TTN      | 7  | 0,38  | 13   | 13,00   |
| (C)16hr(+Ch | Control | Q8WZ42 | Titin                                              | TTN      | 4  | 0,22  | 11   | 11,00   |
| (C)16hr(+Ch | SEEL    | Q8WZ42 | Titin                                              | TTN      | 10 | 0,41  | 27   | 27,00   |
| (C)16hr(+Ch | SEEL    | Q8WZ42 | Titin                                              | TTN      | 9  | 0,38  | 24   | 24,00   |
| (C)16hr(+Ch | SEEL    | P68363 | Tubulin alpha-1B chain                             | TUBA1B   | 3  | 8,65  | 5    | 5,00    |
| (C)16hr(+Ch | SEEL    | P68363 | Tubulin alpha-1B chain                             | TUBA1B   | 6  | 19,07 | 17   | 17,00   |
| (C)16hr(+Ch | SEEL    | P68363 | Tubulin alpha-1B chain                             | TUBA1B   | 4  | 12,64 | 13   | 13,00   |
| (C)16hr(+Ch | SEEL    | P68363 | Tubulin alpha-1B chain                             | TUBA1B   | 5  | 17,07 | 20   | 20,00   |
| (C)16hr(+Ch | Control | P26368 | Splicing factor U2AF 65 kDa subunit                | U2AF2    | 4  | 10,11 | 11   | 11,00   |
| (C)16hr(+Ch | SEEL    | P26368 | Splicing factor U2AF 65 kDa subunit                | U2AF2    | 6  | 14,74 | 17   | 17,00   |
| (C)16hr(+Ch | Control | P62987 | Ubiquitin-60S ribosomal protein L40                | UBA52    | 7  | 50,00 | 59   | 59,00   |

|             |         |        |                                                           |        |    |       |     |        |
|-------------|---------|--------|-----------------------------------------------------------|--------|----|-------|-----|--------|
| (C)16hr(+Ch | Control | P0CG47 | Polyubiquitin-B                                           | UBB    | 4  | 20,52 | 20  | 20,00  |
| (C)16hr(+Ch | Control | P0CG47 | Polyubiquitin-B                                           | UBB    | 5  | 23,14 | 29  | 29,00  |
| (C)16hr(+Ch | Control | P0CG47 | Polyubiquitin-B                                           | UBB    | 5  | 20,52 | 20  | 20,00  |
| (C)16hr(+Ch | SEEL    | P0CG47 | Polyubiquitin-B                                           | UBB    | 6  | 23,14 | 162 | 162,00 |
| (C)16hr(+Ch | SEEL    | P0CG47 | Polyubiquitin-B                                           | UBB    | 6  | 23,14 | 251 | 251,00 |
| (C)16hr(+Ch | SEEL    | P0CG47 | Polyubiquitin-B                                           | UBB    | 5  | 20,52 | 163 | 163,00 |
| (C)16hr(+Ch | SEEL    | Q9UFQ0 | Putative uncharacterized protein DKFZp434K0435 (Fragment) | UBC    | 6  | 23,01 | 253 | 253,00 |
| (C)16hr(+Ch | SEEL    | Q5T4S7 | E3 ubiquitin-protein ligase UBR4                          | UBR4   | 5  | 1,06  | 8   | 8,00   |
| (C)16hr(+Ch | SEEL    | O60701 | UDP-glucose 6-dehydrogenase                               | UGDH   | 3  | 6,68  | 5   | 5,00   |
| (C)16hr(+Ch | Control | Q92900 | Regulator of nonsense transcripts 1                       | UPF1   | 8  | 7,53  | 16  | 16,00  |
| (C)16hr(+Ch | Control | Q92900 | Regulator of nonsense transcripts 1                       | UPF1   | 10 | 10,54 | 18  | 18,00  |
| (C)16hr(+Ch | Control | Q8TAA9 | Vang-like protein 1                                       | VANGL1 | 17 | 37,02 | 135 | 135,00 |
| (C)16hr(+Ch | SEEL    | Q8TAA9 | Vang-like protein 1                                       | VANGL1 | 10 | 25,38 | 43  | 43,00  |
| (C)16hr(+Ch | Control | P26640 | Valine--tRNA ligase                                       | VARS   | 2  | 1,74  | 4   | 4,00   |
| (C)16hr(+Ch | SEEL    | Q6EMK4 | Vasorin                                                   | VASN   | 13 | 22,59 | 61  | 61,00  |
| (C)16hr(+Ch | Control | P08670 | Vimentin                                                  | VIM    | 5  | 11,59 | 17  | 17,00  |
| (C)16hr(+Ch | SEEL    | P08670 | Vimentin                                                  | VIM    | 21 | 43,35 | 130 | 130,00 |
| (C)16hr(+Ch | SEEL    | P04004 | Vitronectin                                               | VTN    | 4  | 6,90  | 24  | 24,00  |
| (C)16hr(+Ch | Control | O14980 | Exportin-1                                                | XPO1   | 8  | 7,38  | 16  | 16,00  |
| (C)16hr(+Ch | SEEL    | O14980 | Exportin-1                                                | XPO1   | 11 | 13,26 | 25  | 25,00  |
| (C)16hr(+Ch | SEEL    | Q9UBH6 | Xenotropic and polytropic retrovirus receptor 1           | XPR1   | 6  | 9,05  | 13  | 13,00  |
| (C)16hr(+Ch | SEEL    | P54577 | Tyrosine--tRNA ligase, cytoplasmic                        | YARS   | 4  | 7,77  | 10  | 10,00  |

**Table S8.** Proteins detected by SEEL and cell surface biotinylation.

| Labeling | UniProt Accession | Protein                                             | Gene     | Cell Surface Proteins | Total Peptides | Total Spectra |         |         |                 |
|----------|-------------------|-----------------------------------------------------|----------|-----------------------|----------------|---------------|---------|---------|-----------------|
|          |                   |                                                     |          |                       |                | Biotin        | ST3Gal1 | ST6Gal1 | ST6Gal1&ST3Gal1 |
| SEEL     | Q6UVK1            | Chondroitin sulfate proteoglycan 4                  | CSPG4    | Cell surface protein  | 241            | 0             | 159     | 318     | 315             |
| SEEL     | Q5ZPR3            | CD276 antigen                                       | CD276    | Cell surface protein  | 51             | 0             | 22      | 205     | 202             |
| SEEL     | Q9P273            | Teneurin-3                                          | TENM3    | Cell surface protein  | 141            | 0             | 17      | 162     | 130             |
| SEEL     | O15230            | Laminin subunit alpha-5                             | LAMA5    | Cell surface protein  | 129            | 0             | 67      | 131     | 103             |
| SEEL     | Q9BY67            | Cell adhesion molecule 1                            | CADM1    | Cell surface protein  | 68             | 0             | 43      | 128     | 136             |
| SEEL     | Q14118            | Dystroglycan                                        | DAG1     | Cell surface protein  | 57             | 0             | 61      | 128     | 118             |
| SEEL     | O00468            | Agrin                                               | AGRN     | Cell surface protein  | 107            | 0             | 68      | 108     | 107             |
| SEEL     | Q7Z5N4            | Protein sidekick-1                                  | SDK1     | Cell surface protein  | 82             | 0             | 0       | 105     | 92              |
| SEEL     | Q8IWT6            | Volume-regulated anion channel subunit LRRC8A       | LRRC8A   | Cell surface protein  | 112            | 0             | 47      | 101     | 85              |
| SEEL     | Q58EX2            | Protein sidekick-2                                  | SDK2     | Cell surface protein  | 68             | 0             | 0       | 97      | 105             |
| SEEL     | P18433            | Receptor-type tyrosine-protein phosphatase alpha    | PTPRA    | Cell surface protein  | 114            | 0             | 137     | 91      | 89              |
| SEEL     | Q93050            | V-type proton ATPase 116 kDa subunit a isoform 1    | ATP6V0A1 | Cell surface protein  | 65             | 0             | 7       | 90      | 59              |
| SEEL     | Q12913            | Receptor-type tyrosine-protein phosphatase eta      | PTPRJ    | Cell surface protein  | 94             | 0             | 74      | 90      | 79              |
| SEEL     | P18084            | Integrin beta-5                                     | ITGB5    | Cell surface protein  | 68             | 0             | 0       | 86      | 75              |
| SEEL     | P23470            | Receptor-type tyrosine-protein phosphatase gamma    | PTPRG    | Cell surface protein  | 118            | 0             | 111     | 84      | 110             |
| SEEL     | Q9HCM3            | UPF0606 protein KIAA1549                            | KIAA1549 | Cell surface protein  | 83             | 0             | 68      | 83      | 79              |
| SEEL     | Q14517            | Protocadherin Fat 1                                 | FAT1     | Cell surface protein  | 98             | 0             | 3       | 82      | 107             |
| SEEL     | P42892            | Endothelin-converting enzyme 1                      | ECE1     | Cell surface protein  | 53             | 0             | 5       | 80      | 84              |
| SEEL     | Q8TDW0            | Volume-regulated anion channel subunit LRRC8C       | LRRC8C   | Cell surface protein  | 88             | 0             | 42      | 78      | 58              |
| SEEL     | P08183            | Multidrug resistance protein 1                      | ABCB1    | Cell surface protein  | 75             | 0             | 4       | 75      | 64              |
| SEEL     | P33527            | Multidrug resistance-associated protein 1           | ABCC1    | Cell surface protein  | 60             | 0             | 0       | 74      | 44              |
| SEEL     | P98164            | Low-density lipoprotein receptor-related protein 2  | LRP2     | Cell surface protein  | 78             | 0             | 11      | 72      | 75              |
| SEEL     | P05026            | Sodium/potassium-transporting ATPase subunit beta-1 | ATP1B1   | Cell surface protein  | 44             | 0             | 0       | 72      | 56              |
| SEEL     | Q9Y4D7            | Plexin-D1                                           | PLXND1   | Cell surface protein  | 57             | 0             | 0       | 71      | 54              |
| SEEL     | Q9UHN6            | Transmembrane protein 2                             | TMEM2    | Cell surface protein  | 59             | 0             | 0       | 67      | 69              |
| SEEL     | O75882            | Attractin                                           | ATRN     | Cell surface protein  | 58             | 0             | 0       | 63      | 73              |
| SEEL     | P56199            | Integrin alpha-1                                    | ITGA1    | Cell surface protein  | 58             | 0             | 0       | 63      | 81              |
| SEEL     | Q9Y666            | Solute carrier family 12 member 7                   | SLC12A7  | Cell surface protein  | 48             | 0             | 0       | 63      | 56              |
| SEEL     | P54709            | Sodium/potassium-transporting ATPase subunit beta-3 | ATP1B3   | Cell surface protein  | 27             | 0             | 0       | 62      | 52              |
| SEEL     | Q01973            | Tyrosine-protein kinase transmembrane receptor ROR1 | ROR1     | Cell surface protein  | 57             | 0             | 68      | 61      | 79              |

|      |        |                                                            |          |                      |    |   |    |    |    |
|------|--------|------------------------------------------------------------|----------|----------------------|----|---|----|----|----|
| SEEL | Q01650 | Large neutral amino acids transporter small subunit 1      | SLC7A5   | Cell surface protein | 35 | 0 | 0  | 61 | 57 |
| SEEL | Q5SZK8 | FRAS1-related extracellular matrix protein 2               | FREM2    | Cell surface protein | 60 | 0 | 3  | 60 | 52 |
| SEEL | P25391 | Laminin subunit alpha-1                                    | LAMA1    | Cell surface protein | 81 | 0 | 23 | 59 | 64 |
| SEEL | Q96J84 | Kin of IRRE-like protein 1                                 | KIRREL   | Cell surface protein | 43 | 0 | 5  | 57 | 46 |
| SEEL | P15151 | Poliovirus receptor                                        | PVR      | Cell surface protein | 19 | 0 | 0  | 57 | 59 |
| SEEL | P54289 | Voltage-dependent calcium channel subunit alpha-2/delta-1  | CACNA2D1 | Cell surface protein | 66 | 0 | 10 | 56 | 87 |
| SEEL | Q13683 | Integrin alpha-7                                           | ITGA7    | Cell surface protein | 45 | 0 | 0  | 56 | 41 |
| SEEL | Q9COB5 | Palmitoyltransferase ZDHHC5                                | ZDHHC5   | Cell surface protein | 42 | 0 | 0  | 56 | 39 |
| SEEL | A4D1S0 | Killer cell lectin-like receptor subfamily G member 2      | KLRG2    | Cell surface protein | 43 | 0 | 7  | 55 | 68 |
| SEEL | O00592 | Podocalyxin                                                | PODXL    | Cell surface protein | 57 | 0 | 88 | 55 | 96 |
| SEEL | Q8NE01 | Metal transporter CNNM3                                    | CNNM3    | Cell surface protein | 42 | 0 | 0  | 55 | 57 |
| SEEL | P04626 | Receptor tyrosine-protein kinase erbB-2                    | ERBB2    | Cell surface protein | 36 | 0 | 0  | 55 | 42 |
| SEEL | Q5KU26 | Collectin-12                                               | COLEC12  | Cell surface protein | 54 | 0 | 11 | 53 | 65 |
| SEEL | Q6P4Q7 | Metal transporter CNNM4                                    | CNNM4    | Cell surface protein | 54 | 0 | 0  | 53 | 46 |
| SEEL | Q8IWA5 | Choline transporter-like protein 2                         | SLC44A2  | Cell surface protein | 43 | 0 | 0  | 53 | 48 |
| SEEL | P50895 | Basal cell adhesion molecule                               | BCAM     | Cell surface protein | 39 | 0 | 6  | 50 | 34 |
| SEEL | Q92673 | Sortilin-related receptor                                  | SORL1    | Cell surface protein | 55 | 0 | 9  | 49 | 45 |
| SEEL | Q92542 | Nicastrin                                                  | NCSTN    | Cell surface protein | 21 | 0 | 0  | 49 | 61 |
| SEEL | Q9Y6N7 | Roundabout homolog 1                                       | ROBO1    | Cell surface protein | 34 | 0 | 0  | 49 | 37 |
| SEEL | P15529 | Membrane cofactor protein                                  | CD46     | Cell surface protein | 24 | 0 | 5  | 48 | 51 |
| SEEL | P16070 | CD44 antigen                                               | CD44     | Cell surface protein | 48 | 0 | 39 | 47 | 62 |
| SEEL | Q9Y639 | Neuroplastin                                               | NPTN     | Cell surface protein | 23 | 0 | 0  | 47 | 50 |
| SEEL | O60279 | Sushi domain-containing protein 5                          | SUSD5    | Cell surface protein | 50 | 0 | 74 | 43 | 59 |
| SEEL | Q8NB49 | Phospholipid-transporting ATPase IG                        | ATP11C   | Cell surface protein | 35 | 0 | 0  | 42 | 29 |
| SEEL | Q99523 | Sortilin                                                   | SORT1    | Cell surface protein | 43 | 0 | 0  | 41 | 56 |
| SEEL | Q9HCU4 | Cadherin EGF LAG seven-pass G-type receptor 2              | CELSR2   | Cell surface protein | 44 | 0 | 0  | 40 | 42 |
| SEEL | A8MVW0 | Protein FAM171A2                                           | FAM171A2 | Cell surface protein | 30 | 0 | 0  | 37 | 40 |
| SEEL | Q68D85 | Natural cytotoxicity triggering receptor 3 ligand 1        | NCR3LG1  | Cell surface protein | 28 | 0 | 0  | 37 | 45 |
| SEEL | Q9Y6M5 | Zinc transporter 1                                         | SLC30A1  | Cell surface protein | 32 | 0 | 0  | 37 | 35 |
| SEEL | Q99808 | Equilibrative nucleoside transporter 1                     | SLC29A1  | Cell surface protein | 34 | 0 | 8  | 36 | 43 |
| SEEL | Q6YHK3 | CD109 antigen                                              | CD109    | Cell surface protein | 39 | 0 | 0  | 36 | 40 |
| SEEL | P78324 | Tyrosine-protein phosphatase non-receptor type substrate 1 | SIRPA    | Cell surface protein | 24 | 0 | 0  | 36 | 26 |
| SEEL | P04920 | Anion exchange protein 2                                   | SLC4A2   | Cell surface protein | 27 | 0 | 0  | 36 | 26 |

|      |        |                                                                                                                                                     |          |                      |    |   |    |    |    |
|------|--------|-----------------------------------------------------------------------------------------------------------------------------------------------------|----------|----------------------|----|---|----|----|----|
| SEEL | Q13797 | Integrin alpha-9                                                                                                                                    | ITGA9    | Cell surface protein | 34 | 0 | 0  | 35 | 42 |
| SEEL | Q5VU97 | VWFA and cache domain-containing protein 1                                                                                                          | CACHD1   | Cell surface protein | 24 | 0 | 0  | 34 | 23 |
| SEEL | P26006 | Integrin alpha-3                                                                                                                                    | ITGA3    | Cell surface protein | 23 | 0 | 0  | 34 | 36 |
| SEEL | P16144 | Integrin beta-4                                                                                                                                     | ITGB4    | Cell surface protein | 41 | 0 | 0  | 34 | 38 |
| SEEL | Q9C0C4 | Semaphorin-4C                                                                                                                                       | SEMA4C   | Cell surface protein | 35 | 0 | 0  | 32 | 34 |
| SEEL | Q9P244 | Leucine-rich repeat and fibronectin type III domain-containing protein 1                                                                            | LRFN1    | Cell surface protein | 32 | 0 | 10 | 31 | 27 |
| SEEL | O15439 | Multidrug resistance-associated protein 4                                                                                                           | ABCC4    | Cell surface protein | 29 | 0 | 0  | 31 | 17 |
| SEEL | Q9NYQ6 | Cadherin EGF LAG seven-pass G-type receptor 1                                                                                                       | CELSR1   | Cell surface protein | 34 | 0 | 0  | 31 | 34 |
| SEEL | Q5VUB5 | Protein FAM171A1                                                                                                                                    | FAM171A1 | Cell surface protein | 24 | 0 | 0  | 31 | 24 |
| SEEL | Q9UMF0 | Intercellular adhesion molecule 5                                                                                                                   | ICAM5    | Cell surface protein | 29 | 0 | 0  | 31 | 33 |
| SEEL | Q9NQS3 | Nectin-3                                                                                                                                            | PVRL3    | Cell surface protein | 33 | 0 | 29 | 30 | 29 |
| SEEL | Q9Y6R1 | Electrogenic sodium bicarbonate cotransporter 1                                                                                                     | SLC4A4   | Cell surface protein | 24 | 0 | 9  | 30 | 14 |
| SEEL | Q6NSJ5 | Volume-regulated anion channel subunit LRRC8E                                                                                                       | LRRC8E   | Cell surface protein | 42 | 0 | 11 | 29 | 30 |
| SEEL | Q9HC56 | Protocadherin-9                                                                                                                                     | PCDH9    | Cell surface protein | 31 | 0 | 0  | 29 | 29 |
| SEEL | O60503 | Adenylate cyclase type 9                                                                                                                            | ADCY9    | Cell surface protein | 25 | 0 | 0  | 28 | 20 |
| SEEL | P35052 | Glypican-1                                                                                                                                          | GPC1     | Cell surface protein | 18 | 0 | 0  | 28 | 12 |
| SEEL | P61073 | C-X-C chemokine receptor type 4                                                                                                                     | CXCR4    | Cell surface protein | 24 | 0 | 7  | 27 | 26 |
| SEEL | O43157 | Plexin-B1                                                                                                                                           | PLXNB1   | Cell surface protein | 61 | 0 | 51 | 27 | 38 |
| SEEL | Q9ULI3 | Protein HEG homolog 1                                                                                                                               | HEG1     | Cell surface protein | 30 | 0 | 26 | 26 | 21 |
| SEEL | B3KKN2 | cDNA FLJ14770 fis, clone NT2RP3004207, highly similar to Homo sapiens seizure related 6 homolog (mouse)-like 2 (SEZ6L2), transcript variant 1, mRNA | SEZ6L2   | Cell surface protein | 33 | 0 | 42 | 26 | 32 |
| SEEL | Q9Y289 | Sodium-dependent multivitamin transporter                                                                                                           | SLC5A6   | Cell surface protein | 34 | 0 | 18 | 26 | 32 |
| SEEL | Q8NFZ8 | Cell adhesion molecule 4                                                                                                                            | CADM4    | Cell surface protein | 21 | 0 | 0  | 26 | 29 |
| SEEL | Q06418 | Tyrosine-protein kinase receptor TYRO3                                                                                                              | TYRO3    | Cell surface protein | 21 | 0 | 0  | 26 | 24 |
| SEEL | B3KW93 | cDNA FLJ42590 fis, clone BRACE3009708, highly similar to Sodium/potassium-transporting ATPase alpha-2chain (EC 3.6.3.9)                             | ATP1A2   | Cell surface protein | 12 | 0 | 0  | 25 | 19 |
| SEEL | Q08722 | Leukocyte surface antigen CD47                                                                                                                      | CD47     | Cell surface protein | 20 | 0 | 0  | 25 | 33 |
| SEEL | Q9NZ53 | Podocalyxin-like protein 2                                                                                                                          | PODXL2   | Cell surface protein | 50 | 0 | 61 | 24 | 50 |
| SEEL | Q6PCB8 | Embigin                                                                                                                                             | EMB      | Cell surface protein | 23 | 0 | 8  | 23 | 23 |
| SEEL | Q9HAR2 | Latrophilin-3                                                                                                                                       | LPHN3    | Cell surface protein | 41 | 0 | 38 | 22 | 29 |
| SEEL | Q14114 | Low-density lipoprotein receptor-related protein 8                                                                                                  | LRP8     | Cell surface protein | 35 | 0 | 30 | 22 | 34 |
| SEEL | Q13641 | Trophoblast glycoprotein                                                                                                                            | TPBG     | Cell surface protein | 29 | 0 | 25 | 22 | 29 |
| SEEL | P43007 | Neutral amino acid transporter A                                                                                                                    | SLC1A4   | Cell surface protein | 23 | 0 | 0  | 22 | 19 |

|      |            |                                                                          |         |                      |    |   |    |    |    |
|------|------------|--------------------------------------------------------------------------|---------|----------------------|----|---|----|----|----|
| SEEL | Q02487     | Desmocollin-2                                                            | DSC2    | Cell surface protein | 24 | 0 | 0  | 21 | 23 |
| SEEL | Q96PD2     | Discoidin, CUB and LCCL domain-containing protein 2                      | DCBLD2  | Cell surface protein | 24 | 0 | 5  | 20 | 26 |
| SEEL | Q7L1W4     | Volume-regulated anion channel subunit LRRC8D                            | LRRC8D  | Cell surface protein | 59 | 0 | 74 | 20 | 20 |
| SEEL | Q6UX71     | Plexin domain-containing protein 2                                       | PLXDC2  | Cell surface protein | 22 | 0 | 6  | 20 | 29 |
| SEEL | Q9H0X4     | Protein ITFG3                                                            | ITFG3   | Cell surface protein | 16 | 0 | 0  | 20 | 15 |
| SEEL | Q16363     | Laminin subunit alpha-4                                                  | LAMA4   | Cell surface protein | 18 | 0 | 0  | 20 | 15 |
| SEEL | Q7Z7M0     | Multiple epidermal growth factor-like domains protein 8                  | MEGF8   | Cell surface protein | 23 | 0 | 0  | 20 | 16 |
| SEEL | O75096     | Low-density lipoprotein receptor-related protein 4                       | LRP4    | Cell surface protein | 22 | 0 | 4  | 19 | 17 |
| SEEL | P48960     | CD97 antigen                                                             | CD97    | Cell surface protein | 14 | 0 | 0  | 19 | 8  |
| SEEL | Q8TAB3     | Protocadherin-19                                                         | PCDH19  | Cell surface protein | 16 | 0 | 0  | 19 | 15 |
| SEEL | P48029     | Sodium- and chloride-dependent creatine transporter 1                    | SLC6A8  | Cell surface protein | 17 | 0 | 0  | 19 | 20 |
| SEEL | Q8N8Z6     | Discoidin, CUB and LCCL domain-containing protein 1                      | DCBLD1  | Cell surface protein | 21 | 0 | 0  | 18 | 19 |
| SEEL | Q8TDY8     | Immunoglobulin superfamily DCC subclass member 4                         | IGDCC4  | Cell surface protein | 19 | 0 | 0  | 18 | 22 |
| SEEL | Q13449     | Limbic system-associated membrane protein                                | LSAMP   | Cell surface protein | 10 | 0 | 0  | 18 | 13 |
| SEEL | P55082     | Microfibril-associated glycoprotein 3                                    | MFAP3   | Cell surface protein | 12 | 0 | 0  | 18 | 16 |
| SEEL | Q12866     | Tyrosine-protein kinase Mer                                              | MERTK   | Cell surface protein | 35 | 0 | 50 | 17 | 30 |
| SEEL | Q9H8M5     | Metal transporter CNNM2                                                  | CNNM2   | Cell surface protein | 18 | 0 | 0  | 17 | 16 |
| SEEL | Q8IWK6     | Probable G-protein coupled receptor 125                                  | GPR125  | Cell surface protein | 12 | 0 | 0  | 17 | 9  |
| SEEL | Q9P2E7     | Protocadherin-10                                                         | PCDH10  | Cell surface protein | 16 | 0 | 5  | 16 | 7  |
| SEEL | Q86XX4     | Extracellular matrix protein FRAS1                                       | FRAS1   | Cell surface protein | 21 | 0 | 0  | 16 | 18 |
| SEEL | P19440     | Gamma-glutamyltranspeptidase 1                                           | GGT1    | Cell surface protein | 19 | 0 | 0  | 16 | 19 |
| SEEL | AOA024RBS4 | Scavenger receptor class B, member 1, isoform CRA_b                      | SCARB1  | Cell surface protein | 11 | 0 | 0  | 16 | 14 |
| SEEL | Q9H2J7     | Sodium-dependent neutral amino acid transporter B(O)AT2                  | SLC6A15 | Cell surface protein | 12 | 0 | 0  | 16 | 3  |
| SEEL | O94910     | Latrophilin-1                                                            | LPHN1   | Cell surface protein | 30 | 0 | 25 | 15 | 17 |
| SEEL | Q13444     | Disintegrin and metalloproteinase domain-containing protein 15           | ADAM15  | Cell surface protein | 13 | 0 | 0  | 15 | 17 |
| SEEL | P78310     | Coxsackievirus and adenovirus receptor                                   | CXADR   | Cell surface protein | 12 | 0 | 0  | 15 | 12 |
| SEEL | Q15303     | Receptor tyrosine-protein kinase erbB-4                                  | ERBB4   | Cell surface protein | 19 | 0 | 0  | 15 | 16 |
| SEEL | Q9Y5Y0     | Feline leukemia virus subgroup C receptor-related protein 1              | FLVCR1  | Cell surface protein | 11 | 0 | 0  | 15 | 14 |
| SEEL | P23458     | Tyrosine-protein kinase JAK1                                             | JAK1    | Cell surface protein | 13 | 0 | 0  | 15 | 9  |
| SEEL | Q9UPN3     | Microtubule-actin cross-linking factor 1, isoforms 1/2/3/5               | MACF1   | Cell surface protein | 16 | 0 | 0  | 15 | 9  |
| SEEL | P22102     | Trifunctional purine biosynthetic protein adenosine-3                    | GART    | Cell surface protein | 34 | 0 | 32 | 14 | 20 |
| SEEL | Q9BTN0     | Leucine-rich repeat and fibronectin type-III domain-containing protein 3 | LRFN3   | Cell surface protein | 15 | 0 | 4  | 14 | 13 |
| SEEL | Q9BZR6     | Reticulon-4 receptor                                                     | RTN4R   | Cell surface protein | 19 | 0 | 17 | 14 | 14 |



|      |            |                                                                   |          |                      |    |   |    |    |    |
|------|------------|-------------------------------------------------------------------|----------|----------------------|----|---|----|----|----|
| SEEL | Q9Y2G3     | Probable phospholipid-transporting ATPase IF                      | ATP11B   | Cell surface protein | 17 | 0 | 0  | 14 | 12 |
| SEEL | Q8N6C5     | Immunoglobulin superfamily member 1                               | IGSF1    | Cell surface protein | 12 | 0 | 0  | 14 | 10 |
| SEEL | Q15043     | Zinc transporter ZIP14                                            | SLC39A14 | Cell surface protein | 13 | 0 | 0  | 14 | 16 |
| SEEL | AOA024R884 | Tenascin C (Hexabrachion), isoform CRA_a                          | TNC      | Cell surface protein | 11 | 0 | 0  | 14 | 7  |
| SEEL | Q08345     | Epithelial discoidin domain-containing receptor 1                 | DDR1     | Cell surface protein | 26 | 0 | 19 | 13 | 15 |
| SEEL | O43155     | Leucine-rich repeat transmembrane protein FLRT2                   | FLRT2    | Cell surface protein | 27 | 0 | 25 | 13 | 18 |
| SEEL | P05106     | Integrin beta-3                                                   | ITGB3    | Cell surface protein | 16 | 0 | 0  | 13 | 14 |
| SEEL | P11166     | Solute carrier family 2, facilitated glucose transporter member 1 | SLC2A1   | Cell surface protein | 11 | 0 | 0  | 13 | 8  |
| SEEL | P30825     | High affinity cationic amino acid transporter 1                   | SLC7A1   | Cell surface protein | 11 | 0 | 0  | 13 | 6  |
| SEEL | Q92485     | Acid sphingomyelinase-like phosphodiesterase 3b                   | SMPDL3B  | Cell surface protein | 9  | 0 | 0  | 13 | 9  |
| SEEL | Q4KMG0     | Cell adhesion molecule-related/down-regulated by oncogenes        | CDON     | Cell surface protein | 17 | 0 | 9  | 12 | 15 |
| SEEL | P08138     | Tumor necrosis factor receptor superfamily member 16              | NGFR     | Cell surface protein | 30 | 0 | 40 | 12 | 39 |
| SEEL | Q8N2Q7     | Neuroigin-1                                                       | NLGN1    | Cell surface protein | 13 | 0 | 6  | 12 | 13 |
| SEEL | Q6EMK4     | Vasorin                                                           | VASN     | Cell surface protein | 20 | 0 | 19 | 12 | 13 |
| SEEL | Q9H6X2     | Anthrax toxin receptor 1                                          | ANTXR1   | Cell surface protein | 10 | 0 | 0  | 12 | 3  |
| SEEL | Q04656     | Copper-transporting ATPase 1                                      | ATP7A    | Cell surface protein | 10 | 0 | 0  | 12 | 7  |
| SEEL | P12830     | Cadherin-1                                                        | CDH1     | Cell surface protein | 12 | 0 | 0  | 12 | 9  |
| SEEL | Q9H6A9     | Pecanex-like protein 3                                            | PCNXL3   | Cell surface protein | 10 | 0 | 0  | 12 | 3  |
| SEEL | P41440     | Folate transporter 1                                              | SLC19A1  | Cell surface protein | 11 | 0 | 0  | 12 | 12 |
| SEEL | Q03167     | Transforming growth factor beta receptor type 3                   | TGFBR3   | Cell surface protein | 9  | 0 | 0  | 12 | 4  |
| SEEL | Q9NV96     | Cell cycle control protein 50A                                    | TMEM30A  | Cell surface protein | 10 | 0 | 0  | 12 | 14 |
| SEEL | Q9Y624     | Junctional adhesion molecule A                                    | F11R     | Cell surface protein | 5  | 0 | 0  | 12 | 0  |
| SEEL | Q6P9F7     | Volume-regulated anion channel subunit LRRC8B                     | LRRC8B   | Cell surface protein | 27 | 0 | 9  | 11 | 24 |
| SEEL | B5M450     | Solute carrier family 4 sodium bicarbonate cotransporter member 7 | SLC4A7   | Cell surface protein | 21 | 0 | 3  | 11 | 30 |
| SEEL | P98155     | Very low-density lipoprotein receptor                             | VLDLR    | Cell surface protein | 17 | 0 | 9  | 11 | 8  |
| SEEL | O14672     | Disintegrin and metalloproteinase domain-containing protein 10    | ADAM10   | Cell surface protein | 12 | 0 | 0  | 11 | 11 |
| SEEL | P54764     | Ephrin type-A receptor 4                                          | EPHA4    | Cell surface protein | 10 | 0 | 0  | 11 | 5  |
| SEEL | P13612     | Integrin alpha-4                                                  | ITGA4    | Cell surface protein | 23 | 0 | 0  | 11 | 34 |
| SEEL | P78504     | Protein jagged-1                                                  | JAG1     | Cell surface protein | 13 | 0 | 0  | 11 | 12 |
| SEEL | O43278     | Kunitz-type protease inhibitor 1                                  | SPINT1   | Cell surface protein | 12 | 0 | 0  | 11 | 13 |
| SEEL | O95297     | Myelin protein zero-like protein 1                                | MPZL1    | Cell surface protein | 3  | 0 | 0  | 11 | 0  |
| SEEL | P13637     | Sodium/potassium-transporting ATPase subunit alpha-3              | ATP1A3   | Cell surface protein | 8  | 0 | 0  | 10 | 3  |
| SEEL | P48509     | CD151 antigen                                                     | CD151    | Cell surface protein | 8  | 0 | 0  | 10 | 8  |

|      |        |                                                                  |         |                      |    |   |    |    |    |
|------|--------|------------------------------------------------------------------|---------|----------------------|----|---|----|----|----|
| SEEL | Q14574 | Desmocollin-3                                                    | DSC3    | Cell surface protein | 17 | 0 | 0  | 10 | 17 |
| SEEL | Q63HQ2 | Pikachurin                                                       | EGFLAM  | Cell surface protein | 11 | 0 | 0  | 10 | 11 |
| SEEL | B72613 | Neuronal membrane glycoprotein M6-b                              | GPM6B   | Cell surface protein | 7  | 0 | 0  | 10 | 6  |
| SEEL | Q9NPH3 | Interleukin-1 receptor accessory protein                         | IL1RAP  | Cell surface protein | 16 | 0 | 0  | 10 | 11 |
| SEEL | O75581 | Low-density lipoprotein receptor-related protein 6               | LRP6    | Cell surface protein | 20 | 0 | 0  | 10 | 26 |
| SEEL | Q8TD43 | Transient receptor potential cation channel subfamily M member 4 | TRPM4   | Cell surface protein | 11 | 0 | 0  | 10 | 4  |
| SEEL | Q9NZU0 | Leucine-rich repeat transmembrane protein FLRT3                  | FLRT3   | Cell surface protein | 19 | 0 | 5  | 9  | 17 |
| SEEL | Q14766 | Latent-transforming growth factor beta-binding protein 1         | LTBP1   | Cell surface protein | 10 | 0 | 6  | 9  | 4  |
| SEEL | Q13740 | CD166 antigen                                                    | ALCAM   | Cell surface protein | 5  | 0 | 0  | 9  | 6  |
| SEEL | P20023 | Complement receptor type 2                                       | CR2     | Cell surface protein | 11 | 0 | 0  | 9  | 11 |
| SEEL | O94898 | Leucine-rich repeats and immunoglobulin-like domains protein 2   | LRIG2   | Cell surface protein | 13 | 0 | 0  | 9  | 10 |
| SEEL | Q9HCM2 | Plexin-A4                                                        | PLXNA4  | Cell surface protein | 7  | 0 | 0  | 9  | 6  |
| SEEL | Q2VWP7 | Protogenin                                                       | PRTG    | Cell surface protein | 10 | 0 | 0  | 9  | 8  |
| SEEL | Q96QD8 | Sodium-coupled neutral amino acid transporter 2                  | SLC38A2 | Cell surface protein | 10 | 0 | 0  | 9  | 7  |
| SEEL | P19634 | Sodium/hydrogen exchanger 1                                      | SLC9A1  | Cell surface protein | 18 | 0 | 9  | 8  | 18 |
| SEEL | O43306 | Adenylate cyclase type 6                                         | ADCY6   | Cell surface protein | 10 | 0 | 0  | 8  | 8  |
| SEEL | O43854 | EGF-like repeat and discoidin I-like domain-containing protein 3 | EDIL3   | Cell surface protein | 8  | 0 | 0  | 8  | 4  |
| SEEL | P15260 | Interferon gamma receptor 1                                      | IFNGR1  | Cell surface protein | 10 | 0 | 0  | 8  | 7  |
| SEEL | P10721 | Mast/stem cell growth factor receptor Kit                        | KIT     | Cell surface protein | 10 | 0 | 0  | 8  | 11 |
| SEEL | O14917 | Protocadherin-17                                                 | PCDH17  | Cell surface protein | 11 | 0 | 0  | 8  | 12 |
| SEEL | Q9UN70 | Protocadherin gamma-C3                                           | PCDHGC3 | Cell surface protein | 9  | 0 | 0  | 8  | 8  |
| SEEL | Q92729 | Receptor-type tyrosine-protein phosphatase U                     | PTPRU   | Cell surface protein | 7  | 0 | 0  | 8  | 4  |
| SEEL | Q8WY21 | VPS10 domain-containing receptor SorCS1                          | SORCS1  | Cell surface protein | 13 | 0 | 0  | 8  | 15 |
| SEEL | Q6V0I7 | Protocadherin Fat 4                                              | FAT4    | Cell surface protein | 4  | 0 | 0  | 8  | 0  |
| SEEL | P02751 | Fibronectin                                                      | FN1     | Cell surface protein | 6  | 0 | 0  | 8  | 0  |
| SEEL | P01892 | HLA class I histocompatibility antigen, A2 alpha chain           | HLA-A   | Cell surface protein | 4  | 0 | 0  | 8  | 0  |
| SEEL | Q9BX67 | Junctional adhesion molecule C                                   | JAM3    | Cell surface protein | 3  | 0 | 0  | 8  | 0  |
| SEEL | P21802 | Fibroblast growth factor receptor 2                              | FGFR2   | Cell surface protein | 16 | 0 | 11 | 7  | 10 |
| SEEL | Q5FWE3 | Proline-rich transmembrane protein 3                             | PRRT3   | Cell surface protein | 30 | 0 | 34 | 7  | 28 |
| SEEL | Q9P0K1 | Disintegrin and metalloproteinase domain-containing protein 22   | ADAM22  | Cell surface protein | 10 | 0 | 0  | 7  | 8  |
| SEEL | Q13873 | Bone morphogenetic protein receptor type-2                       | BMPR2   | Cell surface protein | 8  | 0 | 0  | 7  | 7  |
| SEEL | Q6UXM1 | Leucine-rich repeats and immunoglobulin-like domains protein 3   | LRIG3   | Cell surface protein | 9  | 0 | 0  | 7  | 7  |

|      |        |                                                                                          |           |                      |    |   |   |   |    |
|------|--------|------------------------------------------------------------------------------------------|-----------|----------------------|----|---|---|---|----|
| SEEL | Q99569 | Plakophilin-4                                                                            | PKP4      | Cell surface protein | 6  | 0 | 0 | 7 | 4  |
| SEEL | O60486 | Plexin-C1                                                                                | PLXNC1    | Cell surface protein | 11 | 0 | 0 | 7 | 9  |
| SEEL | Q08431 | Lactadherin                                                                              | MFGE8     | Cell surface protein | 4  | 0 | 0 | 7 | 0  |
| SEEL | O43405 | Cochlin                                                                                  | COCH      | Cell surface protein | 8  | 0 | 4 | 6 | 5  |
| SEEL | A8K385 | cDNA FLJ77978, highly similar to Homo sapiens unc-5 homolog C (C. elegans) (UNC5C), mRNA | UNC5C     | Cell surface protein | 14 | 0 | 8 | 6 | 8  |
| SEEL | P19256 | Lymphocyte function-associated antigen 3                                                 | CD58      | Cell surface protein | 4  | 0 | 0 | 6 | 6  |
| SEEL | P15586 | N-acetylglucosamine-6-sulfatase                                                          | GNS       | Cell surface protein | 10 | 0 | 0 | 6 | 9  |
| SEEL | Q86SQ4 | G-protein coupled receptor 126                                                           | GPR126    | Cell surface protein | 7  | 0 | 0 | 6 | 6  |
| SEEL | Q9BXB1 | Leucine-rich repeat-containing G-protein coupled receptor 4                              | LGR4      | Cell surface protein | 9  | 0 | 0 | 6 | 13 |
| SEEL | E0AG58 | MHC class I chain-related protein B (Fragment)                                           | MICB      | Cell surface protein | 8  | 0 | 0 | 6 | 6  |
| SEEL | Q9UHW9 | Solute carrier family 12 member 6                                                        | SLC12A6   | Cell surface protein | 5  | 0 | 0 | 6 | 4  |
| SEEL | Q8WWZ7 | ATP-binding cassette sub-family A member 5                                               | ABCA5     | Cell surface protein | 3  | 0 | 0 | 6 | 0  |
| SEEL | Q99715 | Collagen alpha-1(XII) chain                                                              | COL12A1   | Cell surface protein | 4  | 0 | 0 | 6 | 0  |
| SEEL | Q9Y6X5 | Bis(5'-adenosyl)-triphosphatase ENPP4                                                    | ENPP4     | Cell surface protein | 4  | 0 | 0 | 6 | 0  |
| SEEL | Q8TDW7 | Protocadherin Fat 3                                                                      | FAT3      | Cell surface protein | 4  | 0 | 0 | 6 | 0  |
| SEEL | P51654 | Glypican-3                                                                               | GPC3      | Cell surface protein | 2  | 0 | 0 | 6 | 0  |
| SEEL | Q99959 | Plakophilin-2                                                                            | PKP2      | Cell surface protein | 2  | 0 | 0 | 6 | 0  |
| SEEL | Q9UP95 | Solute carrier family 12 member 4                                                        | SLC12A4   | Cell surface protein | 4  | 0 | 0 | 6 | 0  |
| SEEL | Q4LDE5 | Sushi, von Willebrand factor type A, EGF and pentraxin domain-containing protein 1       | SVEP1     | Cell surface protein | 4  | 0 | 0 | 6 | 0  |
| SEEL | P22105 | Tenascin-X                                                                               | TNXB      | Cell surface protein | 4  | 0 | 0 | 6 | 0  |
| SEEL | Q9UBN6 | Tumor necrosis factor receptor superfamily member 10D                                    | TNFRSF10D | Cell surface protein | 6  | 0 | 4 | 5 | 0  |
| SEEL | Q8N350 | Protein Dos                                                                              | DOS       | Cell surface protein | 12 | 0 | 4 | 5 | 13 |
| SEEL | P78348 | Acid-sensing ion channel 1                                                               | ASIC1     | Cell surface protein | 6  | 0 | 0 | 5 | 6  |
| SEEL | Q9UNN8 | Endothelial protein C receptor                                                           | PROCR     | Cell surface protein | 6  | 0 | 0 | 5 | 6  |
| SEEL | Q8N370 | Large neutral amino acids transporter small subunit 4                                    | SLC43A2   | Cell surface protein | 8  | 0 | 0 | 5 | 9  |
| SEEL | O60266 | Adenylate cyclase type 3                                                                 | ADCY3     | Cell surface protein | 3  | 0 | 0 | 5 | 0  |
| SEEL | P40189 | Interleukin-6 receptor subunit beta                                                      | IL6ST     | Cell surface protein | 3  | 0 | 0 | 5 | 0  |
| SEEL | Q9ULH0 | Kinase D-interacting substrate of 220 kDa                                                | KIDINS220 | Cell surface protein | 4  | 0 | 0 | 5 | 0  |
| SEEL | O60779 | Thiamine transporter 1                                                                   | SLC19A2   | Cell surface protein | 2  | 0 | 0 | 5 | 0  |
| SEEL | Q86X29 | Lipolysis-stimulated lipoprotein receptor                                                | LSR       | Cell surface protein | 7  | 0 | 2 | 4 | 5  |
| SEEL | P11362 | Fibroblast growth factor receptor 1                                                      | FGFR1     | Cell surface protein | 6  | 0 | 0 | 4 | 5  |
| SEEL | O75084 | Frizzled-7                                                                               | FZD7      | Cell surface protein | 4  | 0 | 0 | 4 | 4  |

|      |        |                                                                   |          |                      |    |   |    |   |    |
|------|--------|-------------------------------------------------------------------|----------|----------------------|----|---|----|---|----|
| SEEL | Q8TB96 | T-cell immunomodulatory protein                                   | ITFG1    | Cell surface protein | 5  | 0 | 0  | 4 | 7  |
| SEEL | A8K122 | KIAA1946, isoform CRA_b                                           | KIAA1946 | Cell surface protein | 6  | 0 | 0  | 4 | 5  |
| SEEL | P32004 | Neural cell adhesion molecule L1                                  | L1CAM    | Cell surface protein | 10 | 0 | 0  | 4 | 12 |
| SEEL | P51805 | Plexin-A3                                                         | PLXNA3   | Cell surface protein | 7  | 0 | 0  | 4 | 8  |
| SEEL | O15440 | Multidrug resistance-associated protein 5                         | ABCC5    | Cell surface protein | 3  | 0 | 0  | 4 | 0  |
| SEEL | Q8TE59 | A disintegrin and metalloproteinase with thrombospondin motifs 19 | ADAMTS19 | Cell surface protein | 3  | 0 | 0  | 4 | 0  |
| SEEL | P54756 | Ephrin type-A receptor 5                                          | EPHA5    | Cell surface protein | 3  | 0 | 0  | 4 | 0  |
| SEEL | Q08334 | Interleukin-10 receptor subunit beta                              | IL10RB   | Cell surface protein | 2  | 0 | 0  | 4 | 0  |
| SEEL | Q14108 | Lysosome membrane protein 2                                       | SCARB2   | Cell surface protein | 3  | 0 | 0  | 4 | 0  |
| SEEL | Q8WUM9 | Sodium-dependent phosphate transporter 1                          | SLC20A1  | Cell surface protein | 2  | 0 | 0  | 4 | 0  |
| SEEL | Q9BX79 | Stimulated by retinoic acid gene 6 protein homolog                | STRA6    | Cell surface protein | 4  | 0 | 3  | 3 | 0  |
| SEEL | P27487 | Dipeptidyl peptidase 4                                            | DPP4     | Cell surface protein | 4  | 0 | 0  | 3 | 4  |
| SEEL | Q6NSJ0 | Uncharacterized family 31 glucosidase KIAA1161                    | KIAA1161 | Cell surface protein | 9  | 0 | 0  | 3 | 10 |
| SEEL | Q8WWI5 | Choline transporter-like protein 1                                | SLC44A1  | Cell surface protein | 6  | 0 | 0  | 3 | 7  |
| SEEL | Q6N022 | Teneurin-4                                                        | TENM4    | Cell surface protein | 5  | 0 | 0  | 3 | 3  |
| SEEL | P17181 | Interferon alpha/beta receptor 1                                  | IFNAR1   | Cell surface protein | 3  | 0 | 0  | 3 | 0  |
| SEEL | O75121 | Microfibrillar-associated protein 3-like                          | MFAP3L   | Cell surface protein | 2  | 0 | 0  | 3 | 0  |
| SEEL | Q6ZSS7 | Major facilitator superfamily domain-containing protein 6         | MFSD6    | Cell surface protein | 2  | 0 | 0  | 3 | 0  |
| SEEL | Q9Y5H2 | Protocadherin gamma-A11                                           | PCDHGA11 | Cell surface protein | 2  | 0 | 0  | 3 | 0  |
| SEEL | Q15223 | Nectin-1                                                          | PVRL1    | Cell surface protein | 2  | 0 | 0  | 3 | 0  |
| SEEL | Q9UIG8 | Solute carrier organic anion transporter family member 3A1        | SLCO3A1  | Cell surface protein | 2  | 0 | 0  | 3 | 0  |
| SEEL | O43657 | Tetraspanin-6                                                     | TSPAN6   | Cell surface protein | 2  | 0 | 0  | 3 | 0  |
| SEEL | P13611 | Versican core protein                                             | VCAN     | Cell surface protein | 11 | 0 | 9  | 2 | 6  |
| SEEL | O14786 | Neuropilin-1                                                      | NRP1     | Cell surface protein | 5  | 0 | 0  | 2 | 5  |
| SEEL | P43003 | Excitatory amino acid transporter 1                               | SLC1A3   | Cell surface protein | 4  | 0 | 0  | 2 | 3  |
| SEEL | Q9H7F0 | Probable cation-transporting ATPase 13A3                          | ATP13A3  | Cell surface protein | 2  | 0 | 0  | 2 | 0  |
| SEEL | P48066 | Sodium- and chloride-dependent GABA transporter 3                 | SLC6A11  | Cell surface protein | 2  | 0 | 0  | 2 | 0  |
| SEEL | Q6ZQN7 | Solute carrier organic anion transporter family member 4C1        | SLCO4C1  | Cell surface protein | 2  | 0 | 0  | 2 | 0  |
| SEEL | Q9NPF0 | CD320 antigen                                                     | CD320    | Cell surface protein | 8  | 0 | 13 | 0 | 14 |
| SEEL | P08174 | Complement decay-accelerating factor                              | CD55     | Cell surface protein | 9  | 0 | 9  | 0 | 14 |
| SEEL | P0C7U0 | Protein ELFN1                                                     | ELFN1    | Cell surface protein | 10 | 0 | 12 | 0 | 3  |
| SEEL | P18827 | Syndecan-1                                                        | SDC1     | Cell surface protein | 9  | 0 | 16 | 0 | 18 |
| SEEL | O75056 | Syndecan-3                                                        | SDC3     | Cell surface protein | 4  | 0 | 5  | 0 | 4  |

|      |            |                                                                |           |                      |    |   |    |   |    |
|------|------------|----------------------------------------------------------------|-----------|----------------------|----|---|----|---|----|
| SEEL | Q92854     | Semaphorin-4D                                                  | SEMA4D    | Cell surface protein | 20 | 0 | 21 | 0 | 18 |
| SEEL | O94933     | SLIT and NTRK-like protein 3                                   | SLITRK3   | Cell surface protein | 14 | 0 | 14 | 0 | 9  |
| SEEL | Q6NUS6     | Tectonic-3                                                     | TCTN3     | Cell surface protein | 5  | 0 | 5  | 0 | 2  |
| SEEL | Q9BZC7     | ATP-binding cassette sub-family A member 2                     | ABCA2     | Cell surface protein | 2  | 0 | 3  | 0 | 0  |
| SEEL | Q9P0X4     | Voltage-dependent T-type calcium channel subunit alpha-1I      | CACNA1I   | Cell surface protein | 3  | 0 | 4  | 0 | 0  |
| SEEL | Q8TCZ2     | CD99 antigen-like protein 2                                    | CD99L2    | Cell surface protein | 2  | 0 | 3  | 0 | 0  |
| SEEL | O95196     | Chondroitin sulfate proteoglycan 5                             | CSPG5     | Cell surface protein | 4  | 0 | 15 | 0 | 0  |
| SEEL | R9WAE9     | DIET1                                                          | DIET1     | Cell surface protein | 2  | 0 | 3  | 0 | 0  |
| SEEL | O14490     | Disks large-associated protein 1                               | DLGAP1    | Cell surface protein | 2  | 0 | 3  | 0 | 0  |
| SEEL | Q8IZP9     | G-protein coupled receptor 64                                  | GPR64     | Cell surface protein | 2  | 0 | 3  | 0 | 0  |
| SEEL | Q9Y450     | HBS1-like protein                                              | HBS1L     | Cell surface protein | 2  | 0 | 3  | 0 | 0  |
| SEEL | O00522     | Krev interaction trapped protein 1                             | KRIT1     | Cell surface protein | 3  | 0 | 5  | 0 | 0  |
| SEEL | Q16787     | Laminin subunit alpha-3                                        | LAMA3     | Cell surface protein | 2  | 0 | 3  | 0 | 0  |
| SEEL | Q9H1U4     | Multiple epidermal growth factor-like domains protein 9        | MEGF9     | Cell surface protein | 5  | 0 | 8  | 0 | 0  |
| SEEL | Q16625     | Occludin                                                       | OCLN      | Cell surface protein | 2  | 0 | 4  | 0 | 0  |
| SEEL | C9JH25     | Proline-rich transmembrane protein 4                           | PRRT4     | Cell surface protein | 3  | 0 | 4  | 0 | 0  |
| SEEL | Q6UXF1     | Transmembrane protein 108                                      | TMEM108   | Cell surface protein | 2  | 0 | 5  | 0 | 0  |
| SEEL | Q4KMQ2     | Anoctamin-6                                                    | ANO6      | Cell surface protein | 5  | 0 | 0  | 0 | 9  |
| SEEL | P08133     | Annexin A6                                                     | ANXA6     | Cell surface protein | 5  | 0 | 0  | 0 | 9  |
| SEEL | Q96CW1     | AP-2 complex subunit mu                                        | AP2M1     | Cell surface protein | 5  | 0 | 0  | 0 | 9  |
| SEEL | P07360     | Complement component C8 gamma chain                            | C8G       | Cell surface protein | 2  | 0 | 0  | 0 | 4  |
| SEEL | O95180     | Voltage-dependent T-type calcium channel subunit alpha-1H      | CACNA1H   | Cell surface protein | 3  | 0 | 0  | 0 | 18 |
| SEEL | Q9NY47     | Voltage-dependent calcium channel subunit alpha-2/delta-2      | CACNA2D2  | Cell surface protein | 2  | 0 | 0  | 0 | 6  |
| SEEL | Q8N3J6     | Cell adhesion molecule 2                                       | CADM2     | Cell surface protein | 5  | 0 | 0  | 0 | 10 |
| SEEL | P01730     | T-cell surface glycoprotein CD4                                | CD4       | Cell surface protein | 2  | 0 | 0  | 0 | 3  |
| SEEL | Q6P995     | Protein FAM171B                                                | FAM171B   | Cell surface protein | 2  | 0 | 0  | 0 | 3  |
| SEEL | Q14332     | Frizzled-2                                                     | FZD2      | Cell surface protein | 3  | 0 | 0  | 0 | 10 |
| SEEL | O75144     | ICOS ligand                                                    | ICOSLG    | Cell surface protein | 3  | 0 | 0  | 0 | 6  |
| SEEL | Q96F46     | Interleukin-17 receptor A                                      | IL17RA    | Cell surface protein | 4  | 0 | 0  | 0 | 8  |
| SEEL | Q8IZA0     | Dyslexia-associated protein KIAA0319-like protein              | KIAA0319L | Cell surface protein | 2  | 0 | 0  | 0 | 6  |
| SEEL | A8MWY0     | UPF0577 protein KIAA1324-like                                  | KIAA1324L | Cell surface protein | 2  | 0 | 0  | 0 | 3  |
| SEEL | P42702     | Leukemia inhibitory factor receptor                            | LIFR      | Cell surface protein | 4  | 0 | 0  | 0 | 6  |
| SEEL | A0A023SGA8 | Truncated MHC class I polypeptide-related protein A (Fragment) | MICA      | Cell surface protein | 2  | 0 | 0  | 0 | 4  |

|             |        |                                                                   |         |                      |     |     |    |     |     |
|-------------|--------|-------------------------------------------------------------------|---------|----------------------|-----|-----|----|-----|-----|
| SEEL        | Q92508 | Piezo-type mechanosensitive ion channel component 1               | PIEZO1  | Cell surface protein | 2   | 0   | 0  | 0   | 2   |
| SEEL        | Q86UN3 | Reticulon-4 receptor-like 2                                       | RTN4RL2 | Cell surface protein | 4   | 0   | 0  | 0   | 5   |
| SEEL        | P34741 | Syndecan-2                                                        | SDC2    | Cell surface protein | 5   | 0   | 0  | 0   | 12  |
| SEEL        | Q9NTN9 | Semaphorin-4G                                                     | SEMA4G  | Cell surface protein | 2   | 0   | 0  | 0   | 3   |
| SEEL        | P11169 | Solute carrier family 2, facilitated glucose transporter member 3 | SLC2A3  | Cell surface protein | 3   | 0   | 0  | 0   | 6   |
| SEEL        | Q9UKZ4 | Teneurin-1                                                        | TENM1   | Cell surface protein | 2   | 0   | 0  | 0   | 9   |
| SEEL        | P57088 | Transmembrane protein 33                                          | TMEM33  | Cell surface protein | 3   | 0   | 0  | 0   | 3   |
| SEEL        | Q5HYA8 | Meckelin                                                          | TMEM67  | Cell surface protein | 4   | 0   | 0  | 0   | 6   |
| SEEL        | Q9C0H2 | Protein tweety homolog 3                                          | TTYH3   | Cell surface protein | 2   | 0   | 0  | 0   | 4   |
| Biotin+SEEL | P11717 | Cation-independent mannose-6-phosphate receptor                   | IGF2R   | Cell surface protein | 307 | 10  | 41 | 449 | 377 |
| Biotin+SEEL | Q13308 | Inactive tyrosine-protein kinase 7                                | PTK7    | Cell surface protein | 166 | 55  | 13 | 269 | 244 |
| Biotin+SEEL | P10586 | Receptor-type tyrosine-protein phosphatase F                      | PTPRF   | Cell surface protein | 198 | 102 | 16 | 234 | 255 |
| Biotin+SEEL | P35222 | Catenin beta-1                                                    | CTNNB1  | Cell surface protein | 131 | 46  | 14 | 231 | 250 |
| Biotin+SEEL | P08195 | 4F2 cell-surface antigen heavy chain                              | SLC3A2  | Cell surface protein | 148 | 9   | 33 | 229 | 207 |
| Biotin+SEEL | O75054 | Immunoglobulin superfamily member 3                               | IGSF3   | Cell surface protein | 176 | 55  | 0  | 214 | 226 |
| Biotin+SEEL | P05556 | Integrin beta-1                                                   | ITGB1   | Cell surface protein | 114 | 35  | 18 | 204 | 240 |
| Biotin+SEEL | O15031 | Plexin-B2                                                         | PLXNB2  | Cell surface protein | 151 | 44  | 8  | 172 | 185 |
| Biotin+SEEL | P35613 | Basigin                                                           | BSG     | Cell surface protein | 44  | 8   | 9  | 164 | 101 |
| Biotin+SEEL | P08069 | Insulin-like growth factor 1 receptor                             | IGF1R   | Cell surface protein | 148 | 22  | 66 | 155 | 154 |
| Biotin+SEEL | O14654 | Insulin receptor substrate 4                                      | IRS4    | Cell surface protein | 172 | 64  | 51 | 154 | 150 |
| Biotin+SEEL | P06756 | Integrin alpha-V                                                  | ITGAV   | Cell surface protein | 106 | 18  | 0  | 150 | 140 |
| Biotin+SEEL | P19022 | Cadherin-2                                                        | CDH2    | Cell surface protein | 88  | 29  | 11 | 138 | 119 |
| Biotin+SEEL | P13591 | Neural cell adhesion molecule 1                                   | NCAM1   | Cell surface protein | 97  | 27  | 0  | 137 | 140 |
| Biotin+SEEL | P55011 | Solute carrier family 12 member 2                                 | SLC12A2 | Cell surface protein | 112 | 5   | 22 | 135 | 115 |
| Biotin+SEEL | P43121 | Cell surface glycoprotein MUC18                                   | MCAM    | Cell surface protein | 103 | 23  | 70 | 130 | 171 |
| Biotin+SEEL | Q14126 | Desmoglein-2                                                      | DSG2    | Cell surface protein | 110 | 17  | 30 | 128 | 95  |
| Biotin+SEEL | P06213 | Insulin receptor                                                  | INSR    | Cell surface protein | 137 | 7   | 85 | 121 | 152 |
| Biotin+SEEL | P00533 | Epidermal growth factor receptor                                  | EGFR    | Cell surface protein | 93  | 26  | 3  | 109 | 112 |
| Biotin+SEEL | P11047 | Laminin subunit gamma-1                                           | LAMC1   | Cell surface protein | 137 | 47  | 55 | 106 | 93  |
| Biotin+SEEL | P23229 | Integrin alpha-6                                                  | ITGA6   | Cell surface protein | 94  | 27  | 0  | 103 | 115 |
| Biotin+SEEL | O75051 | Plexin-A2                                                         | PLXNA2  | Cell surface protein | 94  | 7   | 0  | 101 | 86  |
| Biotin+SEEL | P29317 | Ephrin type-A receptor 2                                          | EPHA2   | Cell surface protein | 87  | 40  | 8  | 100 | 86  |
| Biotin+SEEL | Q9UBG0 | C-type mannose receptor 2                                         | MRC2    | Cell surface protein | 87  | 6   | 4  | 97  | 129 |

|             |        |                                                                      |          |                      |     |    |     |    |     |
|-------------|--------|----------------------------------------------------------------------|----------|----------------------|-----|----|-----|----|-----|
| Biotin+SEEL | Q9UIW2 | Plexin-A1                                                            | PLXNA1   | Cell surface protein | 96  | 5  | 0   | 95 | 114 |
| Biotin+SEEL | Q04721 | Neurogenic locus notch homolog protein 2                             | NOTCH2   | Cell surface protein | 114 | 64 | 24  | 93 | 98  |
| Biotin+SEEL | O75976 | Carboxypeptidase D                                                   | CPD      | Cell surface protein | 114 | 24 | 74  | 93 | 77  |
| Biotin+SEEL | P98160 | Basement membrane-specific heparan sulfate proteoglycan core protein | HSPG2    | Cell surface protein | 100 | 2  | 39  | 88 | 71  |
| Biotin+SEEL | P08648 | Integrin alpha-5                                                     | ITGA5    | Cell surface protein | 65  | 8  | 8   | 87 | 88  |
| Biotin+SEEL | P01130 | Low-density lipoprotein receptor                                     | LDLR     | Cell surface protein | 96  | 4  | 77  | 85 | 105 |
| Biotin+SEEL | P07942 | Laminin subunit beta-1                                               | LAMB1    | Cell surface protein | 126 | 24 | 39  | 83 | 87  |
| Biotin+SEEL | Q92859 | Neogenin                                                             | NEO1     | Cell surface protein | 125 | 30 | 51  | 76 | 113 |
| Biotin+SEEL | P14923 | Junction plakoglobin                                                 | JUP      | Cell surface protein | 58  | 20 | 12  | 73 | 69  |
| Biotin+SEEL | Q13433 | Zinc transporter ZIP6                                                | SLC39A6  | Cell surface protein | 73  | 19 | 47  | 71 | 60  |
| Biotin+SEEL | P08581 | Hepatocyte growth factor receptor                                    | MET      | Cell surface protein | 71  | 15 | 0   | 69 | 102 |
| Biotin+SEEL | P17301 | Integrin alpha-2                                                     | ITGA2    | Cell surface protein | 56  | 17 | 0   | 68 | 35  |
| Biotin+SEEL | O95490 | Latrophilin-2                                                        | LPHN2    | Cell surface protein | 109 | 19 | 83  | 67 | 91  |
| Biotin+SEEL | Q15375 | Ephrin type-A receptor 7                                             | EPHA7    | Cell surface protein | 70  | 15 | 12  | 67 | 64  |
| Biotin+SEEL | O94991 | SLIT and NTRK-like protein 5                                         | SLITRK5  | Cell surface protein | 79  | 9  | 100 | 56 | 78  |
| Biotin+SEEL | Q7KYR7 | Butyrophilin subfamily 2 member A1                                   | BTN2A1   | Cell surface protein | 41  | 4  | 0   | 55 | 65  |
| Biotin+SEEL | Q9ULF5 | Zinc transporter ZIP10                                               | SLC39A10 | Cell surface protein | 81  | 33 | 48  | 54 | 74  |
| Biotin+SEEL | Q92823 | Neuronal cell adhesion molecule                                      | NRCAM    | Cell surface protein | 48  | 16 | 0   | 53 | 55  |
| Biotin+SEEL | Q12860 | Contactin-1                                                          | CNTN1    | Cell surface protein | 54  | 13 | 0   | 45 | 57  |
| Biotin+SEEL | Q9P2B2 | Prostaglandin F2 receptor negative regulator                         | PTGFRN   | Cell surface protein | 37  | 10 | 34  | 41 | 40  |
| Biotin+SEEL | Q05707 | Collagen alpha-1(XIV) chain                                          | COL14A1  | Cell surface protein | 79  | 20 | 48  | 40 | 51  |
| Biotin+SEEL | O60245 | Protocadherin-7                                                      | PCDH7    | Cell surface protein | 46  | 5  | 9   | 39 | 46  |
| Biotin+SEEL | Q969P0 | Immunoglobulin superfamily member 8                                  | IGSF8    | Cell surface protein | 35  | 5  | 0   | 39 | 50  |
| Biotin+SEEL | P02786 | Transferrin receptor protein 1                                       | TFRC     | Cell surface protein | 107 | 71 | 100 | 37 | 27  |
| Biotin+SEEL | P29323 | Ephrin type-B receptor 2                                             | EPHB2    | Cell surface protein | 39  | 7  | 0   | 37 | 34  |
| Biotin+SEEL | Q13332 | Receptor-type tyrosine-protein phosphatase 5                         | PTPRS    | Cell surface protein | 49  | 16 | 0   | 34 | 35  |
| Biotin+SEEL | P46531 | Neurogenic locus notch homolog protein 1                             | NOTCH1   | Cell surface protein | 40  | 7  | 0   | 34 | 28  |
| Biotin+SEEL | O60462 | Neuropilin-2                                                         | NRP2     | Cell surface protein | 64  | 21 | 38  | 32 | 49  |
| Biotin+SEEL | Q6IEE7 | Transmembrane protein 132E                                           | TMEM132E | Cell surface protein | 57  | 11 | 44  | 30 | 44  |
| Biotin+SEEL | Q96GP6 | Scavenger receptor class F member 2                                  | SCARF2   | Cell surface protein | 39  | 12 | 0   | 26 | 36  |
| Biotin+SEEL | Q01974 | Tyrosine-protein kinase transmembrane receptor ROR2                  | ROR2     | Cell surface protein | 32  | 7  | 15  | 25 | 35  |
| Biotin+SEEL | P14543 | Nidogen-1                                                            | NID1     | Cell surface protein | 51  | 14 | 27  | 24 | 34  |
| Biotin+SEEL | Q9NT99 | Leucine-rich repeat-containing protein 4B                            | LRRC4B   | Cell surface protein | 42  | 7  | 41  | 23 | 33  |

|             |        |                                                                  |          |                      |    |    |    |    |    |
|-------------|--------|------------------------------------------------------------------|----------|----------------------|----|----|----|----|----|
| Biotin+SEEL | P30533 | Alpha-2-macroglobulin receptor-associated protein                | LRPAP1   | Cell surface protein | 20 | 20 | 0  | 22 | 0  |
| Biotin+SEEL | P55268 | Laminin subunit beta-2                                           | LAMB2    | Cell surface protein | 49 | 15 | 25 | 22 | 19 |
| Biotin+SEEL | P54760 | Ephrin type-B receptor 4                                         | EPHB4    | Cell surface protein | 23 | 5  | 0  | 21 | 25 |
| Biotin+SEEL | Q9H2E6 | Semaphorin-6A                                                    | SEMA6A   | Cell surface protein | 27 | 5  | 12 | 19 | 15 |
| Biotin+SEEL | Q9UHI8 | A disintegrin and metalloproteinase with thrombospondin motifs 1 | ADAMTS1  | Cell surface protein | 39 | 43 | 0  | 18 | 18 |
| Biotin+SEEL | P23468 | Receptor-type tyrosine-protein phosphatase delta                 | PTPRD    | Cell surface protein | 21 | 7  | 0  | 16 | 18 |
| Biotin+SEEL | Q96JA1 | Leucine-rich repeats and immunoglobulin-like domains protein 1   | LRIG1    | Cell surface protein | 23 | 5  | 0  | 16 | 16 |
| Biotin+SEEL | O60716 | Catenin delta-1                                                  | CTNND1   | Cell surface protein | 37 | 49 | 6  | 15 | 10 |
| Biotin+SEEL | Q09666 | Neuroblast differentiation-associated protein AHNAK              | AHNAK    | Cell surface protein | 35 | 29 | 13 | 15 | 11 |
| Biotin+SEEL | Q15262 | Receptor-type tyrosine-protein phosphatase kappa                 | PTPRK    | Cell surface protein | 27 | 6  | 0  | 15 | 28 |
| Biotin+SEEL | P35221 | Catenin alpha-1                                                  | CTNNA1   | Cell surface protein | 44 | 58 | 0  | 14 | 19 |
| Biotin+SEEL | P39060 | Collagen alpha-1(XVIII) chain                                    | COL18A1  | Cell surface protein | 45 | 13 | 29 | 13 | 38 |
| Biotin+SEEL | P23352 | Anosmin-1                                                        | KAL1     | Cell surface protein | 21 | 12 | 0  | 12 | 16 |
| Biotin+SEEL | Q99985 | Semaphorin-3C                                                    | SEMA3C   | Cell surface protein | 17 | 6  | 0  | 11 | 15 |
| Biotin+SEEL | P20020 | Plasma membrane calcium-transporting ATPase 1                    | ATP2B1   | Cell surface protein | 9  | 4  | 0  | 10 | 4  |
| Biotin+SEEL | P78536 | Disintegrin and metalloproteinase domain-containing protein 17   | ADAM17   | Cell surface protein | 11 | 6  | 0  | 9  | 5  |
| Biotin+SEEL | Q24JP5 | Transmembrane protein 132A                                       | TMEM132A | Cell surface protein | 34 | 5  | 32 | 9  | 29 |
| Biotin+SEEL | P07384 | Calpain-1 catalytic subunit                                      | CAPN1    | Cell surface protein | 35 | 4  | 24 | 7  | 34 |
| Biotin+SEEL | O43491 | Band 4.1-like protein 2                                          | EPB41L2  | Cell surface protein | 16 | 22 | 0  | 5  | 0  |
| Biotin+SEEL | Q9Y2J2 | Band 4.1-like protein 3                                          | EPB41L3  | Cell surface protein | 17 | 12 | 5  | 5  | 7  |
| Biotin+SEEL | Q16891 | MICOS complex subunit MIC60                                      | IMMT     | Cell surface protein | 11 | 10 | 0  | 5  | 5  |
| Biotin+SEEL | Q92692 | Nectin-2                                                         | PVRL2    | Cell surface protein | 11 | 8  | 0  | 5  | 12 |
| Biotin+SEEL | Q8IZJ1 | Netrin receptor UNC5B                                            | UNC5B    | Cell surface protein | 15 | 4  | 13 | 5  | 4  |
| Biotin+SEEL | P98172 | Ephrin-B1                                                        | EFNB1    | Cell surface protein | 9  | 2  | 0  | 4  | 9  |
| Biotin+SEEL | A0FGR8 | Extended synaptotagmin-2                                         | ESYT2    | Cell surface protein | 17 | 26 | 0  | 3  | 4  |
| Biotin+SEEL | Q9H223 | EH domain-containing protein 4                                   | EHD4     | Cell surface protein | 4  | 2  | 0  | 3  | 0  |
| Biotin+SEEL | P05067 | Amyloid beta A4 protein                                          | APP      | Cell surface protein | 8  | 18 | 0  | 0  | 3  |
| Biotin+SEEL | Q9H9A6 | Leucine-rich repeat-containing protein 40                        | LRRC40   | Cell surface protein | 7  | 6  | 5  | 0  | 0  |
| Biotin+SEEL | Q92824 | Proprotein convertase subtilisin/kexin type 5                    | PCSK5    | Cell surface protein | 8  | 5  | 9  | 0  | 0  |
| Biotin+SEEL | P28288 | ATP-binding cassette sub-family D member 3                       | ABCD3    | Cell surface protein | 4  | 4  | 0  | 0  | 5  |
| Biotin+SEEL | O14828 | Secretory carrier-associated membrane protein 3                  | SCAMP3   | Cell surface protein | 4  | 4  | 0  | 0  | 3  |
| Biotin+SEEL | P16278 | Beta-galactosidase                                               | GLB1     | Cell surface protein | 6  | 3  | 2  | 0  | 3  |
| Biotin      | Q14690 | Protein RRP5 homolog                                             | PDCD11   | Cell surface protein | 23 | 45 | 0  | 0  | 0  |



|        |        |                                                                                              |         |                      |    |    |   |   |   |
|--------|--------|----------------------------------------------------------------------------------------------|---------|----------------------|----|----|---|---|---|
| Biotin | P02458 | Collagen alpha-1(II) chain                                                                   | COL2A1  | Cell surface protein | 17 | 35 | 0 | 0 | 0 |
| Biotin | P27797 | Calreticulin                                                                                 | CALR    | Cell surface protein | 11 | 31 | 0 | 0 | 0 |
| Biotin | Q62XV5 | Transmembrane and TPR repeat-containing protein 3                                            | TMTC3   | Cell surface protein | 14 | 29 | 0 | 0 | 0 |
| Biotin | Q13586 | Stromal interaction molecule 1                                                               | STIM1   | Cell surface protein | 10 | 23 | 0 | 0 | 0 |
| Biotin | P08572 | Collagen alpha-2(IV) chain                                                                   | COL4A2  | Cell surface protein | 7  | 22 | 0 | 0 | 0 |
| Biotin | Q5JRA6 | Melanoma inhibitory activity protein 3                                                       | MIA3    | Cell surface protein | 12 | 20 | 0 | 0 | 0 |
| Biotin | Q12959 | Disks large homolog 1                                                                        | DLG1    | Cell surface protein | 8  | 18 | 0 | 0 | 0 |
| Biotin | P55196 | Afadin                                                                                       | MLLT4   | Cell surface protein | 10 | 16 | 0 | 0 | 0 |
| Biotin | O43852 | Calumenin                                                                                    | CALU    | Cell surface protein | 4  | 12 | 0 | 0 | 0 |
| Biotin | P06733 | Alpha-enolase                                                                                | ENO1    | Cell surface protein | 7  | 11 | 0 | 0 | 0 |
| Biotin | Q9Y2H6 | Fibronectin type-III domain-containing protein 3A                                            | FNDC3A  | Cell surface protein | 5  | 11 | 0 | 0 | 0 |
| Biotin | Q9P2M7 | Cingulin                                                                                     | CGN     | Cell surface protein | 6  | 10 | 0 | 0 | 0 |
| Biotin | Q16555 | Dihydropyrimidinase-related protein 2                                                        | DPYSL2  | Cell surface protein | 2  | 10 | 0 | 0 | 0 |
| Biotin | Q14BN4 | Sarcolemmal membrane-associated protein                                                      | SLMAP   | Cell surface protein | 7  | 9  | 0 | 0 | 0 |
| Biotin | P38606 | V-type proton ATPase catalytic subunit                                                       | ATP6V1A | Cell surface         | 4  | 8  | 0 | 0 | 0 |
| Biotin | Q9UBC2 | Epidermal growth factor receptor substrate 15-like 1                                         | EPS15L1 | Cell surface protein | 5  | 8  | 0 | 0 | 0 |
| Biotin | Q6NX51 | Exocyst complex component 4                                                                  | EXOC4   | Cell surface protein | 6  | 8  | 0 | 0 | 0 |
| Biotin | P02462 | Collagen alpha-1(IV) chain                                                                   | COL4A1  | Cell surface protein | 4  | 7  | 0 | 0 | 0 |
| Biotin | P12109 | Collagen alpha-1(VI) chain                                                                   | COL6A1  | Cell surface protein | 3  | 6  | 0 | 0 | 0 |
| Biotin | Q6NUQ4 | Transmembrane protein 214                                                                    | TMEM214 | Cell surface protein | 3  | 6  | 0 | 0 | 0 |
| Biotin | P23634 | Plasma membrane calcium-transporting ATPase 4                                                | ATP2B4  | Cell surface protein | 2  | 5  | 0 | 0 | 0 |
| Biotin | P04083 | Annexin A1                                                                                   | ANXA1   | Cell surface protein | 2  | 4  | 0 | 0 | 0 |
| Biotin | B2RCM3 | cDNA, FLJ96158, highly similar to Homo sapiens calpain 2, (m/II) large subunit (CAPN2), mRNA | CAPN2   | Cell surface protein | 4  | 4  | 0 | 0 | 0 |
| Biotin | P26232 | Catenin alpha-2                                                                              | CTNNA2  | Cell surface protein | 2  | 4  | 0 | 0 | 0 |
| Biotin | Q14195 | Dihydropyrimidinase-related protein 3                                                        | DPYSL3  | Cell surface protein | 2  | 4  | 0 | 0 | 0 |
| Biotin | P69849 | Nodal modulator 3                                                                            | NOMO3   | Cell surface protein | 2  | 4  | 0 | 0 | 0 |
| Biotin | Q9H3N1 | Thioredoxin-related transmembrane protein 1                                                  | TMX1    | Cell surface protein | 2  | 4  | 0 | 0 | 0 |
| Biotin | Q9UM73 | ALK tyrosine kinase receptor                                                                 | ALK     | Cell surface protein | 2  | 3  | 0 | 0 | 0 |
| Biotin | P08758 | Annexin A5                                                                                   | ANXA5   | Cell surface protein | 3  | 3  | 0 | 0 | 0 |
| Biotin | O95400 | CD2 antigen cytoplasmic tail-binding protein 2                                               | CD2BP2  | Cell surface protein | 2  | 3  | 0 | 0 | 0 |
| Biotin | Q14031 | Collagen alpha-6(IV) chain                                                                   | COL4A6  | Cell surface protein | 2  | 3  | 0 | 0 | 0 |
| Biotin | Q16658 | Fascin                                                                                       | FSCN1   | Cell surface protein | 2  | 3  | 0 | 0 | 0 |
| Biotin | Q86VI3 | Ras GTPase-activating-like protein IQGAP3                                                    | IQGAP3  | Cell surface protein | 2  | 3  | 0 | 0 | 0 |

|        |        |                          |        |                      |   |   |   |   |   |
|--------|--------|--------------------------|--------|----------------------|---|---|---|---|---|
| Biotin | Q9BTV4 | Transmembrane protein 43 | TMEM43 | Cell surface protein | 2 | 2 | 0 | 0 | 0 |
|--------|--------|--------------------------|--------|----------------------|---|---|---|---|---|

## Chemical Synthesis

### General methods and materials

NeuAc and D-mannosamine·HCl were purchased from Carbosynth LLC. Other reagents were obtained from commercial sources and used as purchased. Dichloromethane (DCM) was freshly distilled using standard procedures. Other organic solvents were purchased anhydrous and used without further purification. Unless otherwise noted, all reactions were carried out at room temperature (RT) in glassware with magnetic stirring. Organic solutions were concentrated under reduced pressure with bath temperatures < 30 °C. Flash column chromatography was carried out on silica gel G60 (Silicycle, 60-200 μm, 60 Å). Thin-layer chromatography (TLC) was carried out on Silica gel 60 F<sub>254</sub> (EMD Chemicals Inc.) with detection by UV absorption (254 nm) where applicable, by spraying with 20% sulfuric acid in ethanol followed by charring at ~150 °C or by spraying with a solution of (NH<sub>4</sub>)<sub>6</sub>Mo<sub>7</sub>O<sub>24</sub>·H<sub>2</sub>O (25 g/L) in 10% sulfuric acid in ethanol followed by charring at ~150°C. <sup>1</sup>H and <sup>13</sup>C NMR spectra were recorded on a Varian Inova-300 (300/75 MHz), a Varian Inova-500 (500 MHz) and a Varian Inova-600 (600/150 MHz) spectrometer equipped with sun workstations. Multiplicities are quoted as singlet (s), doublet (d), doublet of doublets (dd), triplet (t) or multiplet (m). All NMR signals were assigned on the basis of <sup>1</sup>H NMR, <sup>13</sup>C NMR, gCOSY and gHSQC experiments. All chemical shifts are quoted on the δ-scale in parts per million (ppm). Residual solvent signals were used as an internal reference. Mass spectra were recorded on an Applied Biosystems 5800 MALDI-TOF or Shimadzu LCMS-IT-TOF mass spectrometer. The matrix used was 2,5-dihydroxy-benzoic acid (DHB). Reverse-Phase HPLC was performed on an Agilent 1200 series system equipped with an auto-sampler, fraction-collector, UV-detector and eclipse XDB-C18 column (5 μm, 4.6 × 250 mm or 9.4 × 250 mm).

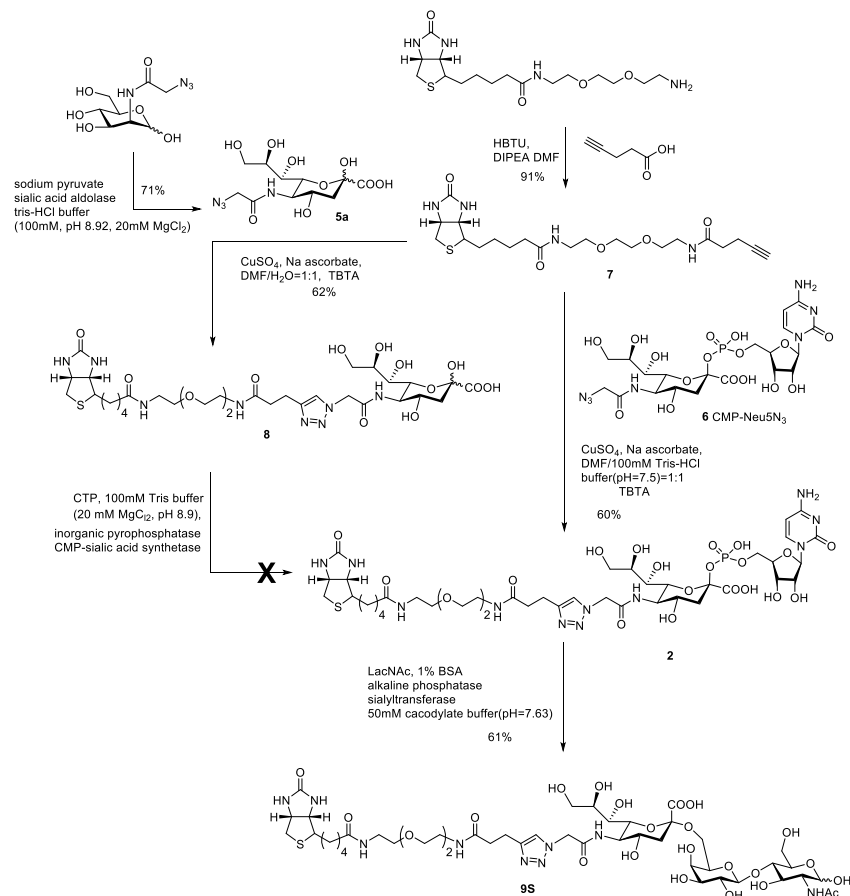

**Scheme S1.** Biotinylation of C5 position of sialic acid.

#### 4-Pentynamide, *N*-[2-[2-[2-[(1-biotinyl)amino]ethoxy]ethoxy]ethyl]- (7):

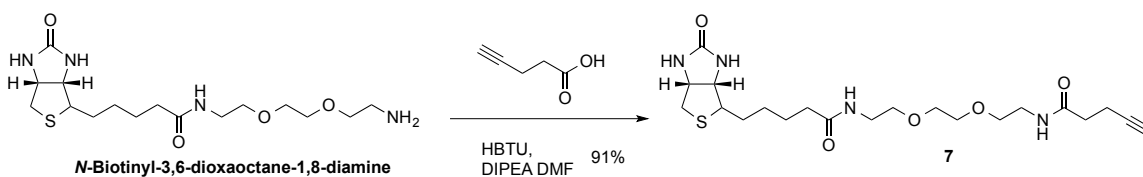

Pentynoic acid (100 mg, 1 mmol), 1-[bis(dimethylamino)methylene]-1*H*-1,2,3-triazolo[4,5-*b*]pyridinium 3-oxid hexafluorophosphate (HATU, 380 mg, 1 mmol) and *N,N*-diisopropylethylamine (DIPEA) (204  $\mu$ L, 1.17 mmol) in DMF (10 mL) was stirred for 10 min at room temperature before being adding dropwise to a solution of *N*-biotinyl-3,6-dioxaoctane-1,8-diamine<sup>1</sup> (255 mg, 0.68 mmol) in DMF (5 mL). The resulting solution was stirred for another 2 h, after which the DMF was removed under reduced pressure

and the residue was purified by silica gel column chromatography using a gradient of methanol in CH<sub>2</sub>Cl<sub>2</sub> (5→25%) to give **7** as a white solid (280 mg, 91%). <sup>1</sup>H NMR (300 MHz, D<sub>2</sub>O) δ 4.52 (dd, *J* = 7.8, 4.7 Hz, 1H, CHNH, biotin), 4.33 (dd, *J* = 7.8, 4.5 Hz, 1H, CHNH biotin), 3.65 (s, 4H, OCH<sub>2</sub>CH<sub>2</sub>O), 3.58 (t, *J* = 5.5 Hz, 4H, NHCH<sub>2</sub>CH<sub>2</sub>O + OCH<sub>2</sub>CH<sub>2</sub>NH), 3.40 (dd, *J* = 5.4, 2.8 Hz, 4H, NHCH<sub>2</sub>CH<sub>2</sub>O+ OCH<sub>2</sub>CH<sub>2</sub>NH ), 3.30 – 3.18 (m, 2H, CHS, biotin + C≡CH), 2.95 (dd, *J* = 12.8, 5.0 Hz, 1H, CHHS), 2.73 (d, *J* = 12.7 Hz, 1H, CHHS), 2.53 – 2.38 (m, 4H, C=OCH<sub>2</sub>CH<sub>2</sub>C≡C), 2.25 (t, *J* = 7.3 Hz, 2H, CH<sub>2</sub>CH<sub>2</sub>CH<sub>2</sub>CH<sub>2</sub>C=O, biotin), 1.85 – 1.43 (m, 6H, CH<sub>2</sub>CH<sub>2</sub>CH<sub>2</sub>CH<sub>2</sub>C=O, biotin ). <sup>13</sup>C NMR (75 MHz, D<sub>2</sub>O) δ 71.5, 71.5, 70.9, 70.8, 63.7, 61.8, 57.3, 49.6, 41.1, 40.9, 40.5, 40.5, 36.8, 36.3, 36.2, 29.9, 27.1, 27.1, 15.8. MALDI-MS: *m/z* calcd for C<sub>21</sub>H<sub>34</sub>N<sub>4</sub>O<sub>5</sub>S [M+H]<sup>+</sup>: 455.2323; found 455.2786.

### 5-azidoacetamido-3, 5- dideoxy -D-glycero-D-galacto-2-nonulosonic acid (**5a**):

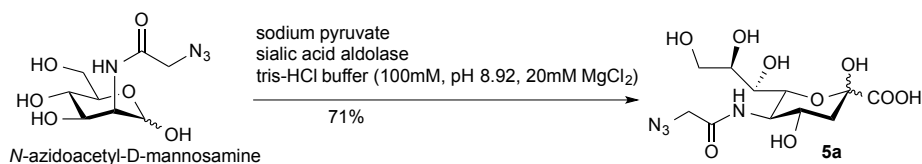

To a solution of *N*-azidoacetyl-D-mannosamine (5 mg, 0.019 mmol)<sup>2</sup> and sodium pyruvate (10.5 mg, 0.095 mmol) in tris-HCl buffer (100 mM, pH 8.9, 20 mM MgCl<sub>2</sub>, 1 mL) was added sialic acid aldolase (0.2 U/μL, 5 μL). The reaction mixture was incubated at 37 °C, and progress of the reaction was monitored by TLC (EtOH : NH<sub>4</sub>HCO<sub>3</sub> (1 M), 7:3, v:v), which after 12 h indicated completion of the reaction. Lyophilization of this mixture provide a residue that was purified by silica gel column chromatography using a gradient of to methanol in CH<sub>2</sub>Cl<sub>2</sub> (10% →50%) to give **5a** as a white amorphous solid (4.7 mg, 71%). <sup>1</sup>H NMR (300 MHz, D<sub>2</sub>O) δ 4.05 – 3.80 (m, 4H), 3.71 (dd, *J* = 11.5, 2.8 Hz, 1H, H-9a), 3.67 – 3.62 (m, 4H), 3.48 (dd, *J* = 11.6, 6.2 Hz, 1H, H-9b), 3.39 (d, *J* = 8.9 Hz, 1H), 2.10 (dd, *J* = 12.9, 4.6 Hz, 1H, H-3eq), 1.78 – 1.63 (m, 1H, H-3ax). <sup>13</sup>C NMR (75 MHz, d<sub>2</sub>o) δ 69.9, 68.9, 68.3, 67.2, 63.2, 63.1, 61.4, 52.4, 39.5, 38.6. HRMS (ESI): *m/z* calcd for C<sub>11</sub>H<sub>18</sub>N<sub>4</sub>O<sub>9</sub> [M-H]<sup>-</sup>: 349.1001; found 349.2042.

**5-[[2-[4-[2-[2-[2-[2-[(1-biotinyl)amino]ethoxy]ethoxy]ethylamino]oxoethyl]-1H-1,2,3-triazol-1-yl]acetyl]amino]-3, 5-dideoxy-D-glycero-D-galacto-2-nonulosonic acid (8):**

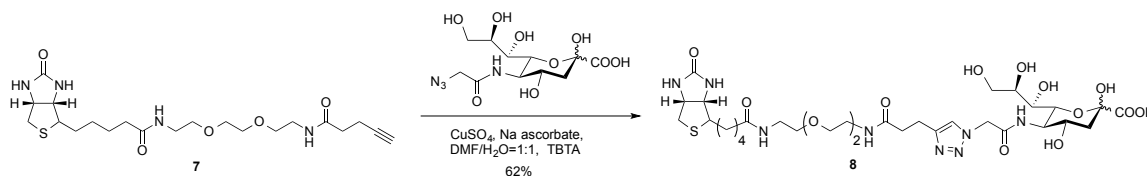

The solution of compound **7** (20 mg, 0.044 mmol) in DMF (1 mL) was added to the solution of **5a** (12 mg, 0.034 mmol) in H<sub>2</sub>O (pH 7.5, 1 mL). To this mixture was added CuSO<sub>4</sub> (100 mM, 270  $\mu$ L), sodium L-ascorbate (100 mM, 340  $\mu$ L) and TBTA (3.7 mg, 0.007 mmol). After stirring for 3 h at ambient temperature, the reaction mixture was centrifuged and the supernatant was collected and concentrated under reduced pressure to give a residue that was purified by silica gel column chromatography using a gradient of methanol in CH<sub>2</sub>Cl<sub>2</sub> (10%  $\rightarrow$ 50%) to give **8** as a white solid (17 mg, 62%). <sup>1</sup>H NMR (500 MHz, D<sub>2</sub>O)  $\delta$  7.74 (s, 1H, CH=C, triazole), 5.17 (s, 2H, triazole-CH<sub>2</sub>-CONH), 4.48 (dd, *J* = 7.9, 4.8 Hz, 1H, CHNH, biotin), 4.30 (dd, *J* = 7.8, 4.4 Hz, 1H, CHNH, biotin), 3.96 (d, *J* = 10.6 Hz, 2H), 3.86 (t, *J* = 10.2 Hz, 1H), 3.74–3.64 (m, 2H), 3.52 (dq, *J* = 14.7, 5.3 Hz, 7H, H-9b + OCH<sub>2</sub>CH<sub>2</sub>O+NHCH<sub>2</sub>CH<sub>2</sub>O), 3.46 (t, *J* = 5.4 Hz, 2H, OCH<sub>2</sub>CH<sub>2</sub>NH), 3.26 (dt, *J* = 14.7, 5.2 Hz, 4H, NHCH<sub>2</sub>CH<sub>2</sub>O+ OCH<sub>2</sub>CH<sub>2</sub>NH), 3.20 (dt, *J* = 9.8, 5.3 Hz, 1H, CHS, biotin), 2.92 (t, *J* = 7.3 Hz, 2H, triazole-CH<sub>2</sub>CH<sub>2</sub>C=O), 2.87 (dd, *J* = 13.0, 4.9 Hz, 1H, CHHS), 2.65 (d, *J* = 13.0 Hz, 1H, CHHS), 2.53 (t, *J* = 7.2 Hz, 2H, triazole CH<sub>2</sub>CH<sub>2</sub>C=O), 2.15 (t, *J* = 7.2 Hz, 3H, CH<sub>2</sub>CH<sub>2</sub>CH<sub>2</sub>CH<sub>2</sub>C=O, biotin, H-3eq), 1.70 (q, *J* = 11.5, 10.7 Hz, 1H, H-3ax), 1.64–1.39 (m, 4H, CH<sub>2</sub>CH<sub>2</sub>CH<sub>2</sub>CH<sub>2</sub>C=O, biotin), 1.34–1.23 (m, 2H, CH<sub>2</sub>CH<sub>2</sub>CH<sub>2</sub>CH<sub>2</sub>C=O, biotin). <sup>13</sup>C NMR (126 MHz, D<sub>2</sub>O)  $\delta$  124.8, 70.5, 70.0, 69.4, 68.9, 68.9, 63.2, 63.0, 62.1, 60.2, 55.3, 52.6, 51.9, 39.7, 39.7, 39.3, 38.9, 38.8, 35.4, 35.0, 27.8, 27.7, 27.6, 25.0, 21.0. HRMS (ESI): *m/z*: calcd for C<sub>32</sub>H<sub>52</sub>N<sub>8</sub>O<sub>14</sub>S [M-H]<sup>-</sup>: 803.3251; found: 803.3567.

**Cytidine-5'-monophospho-5-azidoacetamido-3, 5- dideoxy-β-D-glycero-D-galacto-2-nonulopyranosonic acid (6):**

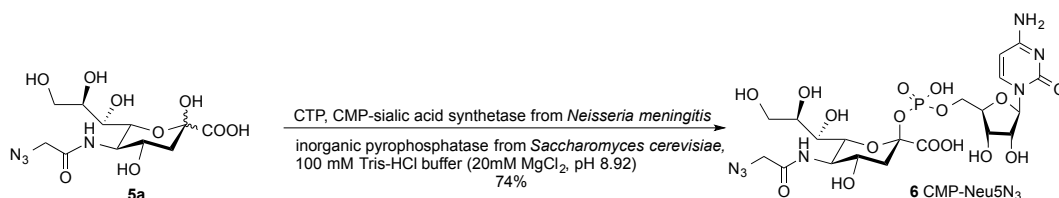

CMP-sialic acid synthetase (0.1U/μL, 10μL) and inorganic pyrophosphatase (0.2 U/μL, 5 μL) were added to a mixture of **5a** (10.5 mg, 0.03 mmol) in tris-HCl buffer (100mM, pH 8.92, 20 mM MgCl<sub>2</sub>, 2 mL), containing CTP (33 mg, 0.063 mmol). The tube was incubated at 37 °C, and progress of the reaction was monitored by TLC (i-PrOH : 20 mM NH<sub>4</sub>Cl = 4:1, v:v), which after 4 h indicated completion of the reaction. EtOH (14 mL) was added, and the mixture was kept on ice for 2 h prior to centrifugation and the supernatant was decanted and the pellet (mostly inorganic salts) was re-suspended in EtOH (8mL), cooled on ice for 1 h and centrifuged. The combined ethanol extracts were concentrated under reduced pressure. The residue was redissolved in 1.5 mL distilled water followed by lyophilization to provide a crude material, which was applied on a Biogel fine P-2 column (75\*1.5 cm, eluted with 0.1 M NH<sub>4</sub>HCO<sub>3</sub> at 4 °C in the dark). The product was detected by TLC, and appropriate fractions were combined and lyophilized to provide **6** as a white solid (14.5 mg, 74%).

**One-pot two-enzyme system approach for synthesis of compound 6<sup>2</sup>.** Sialic acid aldolase (0.2 U/μL, 5 μL), and CMP-sialic acid synthetase (0.2 U/μL, 5μL) were added to a mixture of *N*-azidoacetyl-D-mannosamine (5 mg, 0.019 mmol) in tris-HCl buffer (100 mM, pH 8.9, 20 mM MgCl<sub>2</sub>, 1.9 mL), containing sodium pyruvate (10.5 mg, 0.095 mmol) and CTP (10 mg, 0.019 mmol). The tube was incubated at 37 °C, and progress of the reaction was monitored by TLC (EtOH : aq. NH<sub>4</sub>HCO<sub>3</sub> (1 M) 7:3, v:v), which after 5 h indicated completion of the reaction. EtOH (3 mL) was added, and the precipitate was removed by centrifugation and the supernatant was concentrated under reduced pressure. The residue was redissolved in distilled water (500 μL) followed by lyophilization to provide a crude material that was applied to a Biogel fine P-2

column (50\* 1 cm, eluted with 0.1 M NH<sub>4</sub>HCO<sub>3</sub> at 4 °C in the dark). The product was detected by TLC, and appropriate fractions were combined and lyophilized to provide **6** as an amorphous white solid (10.1 mg, 81%). <sup>1</sup>H NMR (500 MHz, d<sub>2</sub>o) δ 7.86 (d, *J* = 7.6 Hz, 1H, H-6, cyt), 6.02 (d, *J* = 7.5 Hz, 1H, H-5, cyt), 5.88 (d, *J* = 4.5 Hz, 1H, H-1, rib), 4.27 – 4.19 (m, 2H, H-2 + H-3, rib), 4.12 (dd, *J* = 9.1, 7.6 Hz, 4H), 4.08 – 3.97 (m, 3H, H-4 + N<sub>3</sub>CH<sub>2</sub>CO), 3.92 (t, *J* = 10.3 Hz, 1H), 3.83 (ddd, *J* = 9.4, 6.5, 2.6 Hz, 1H), 3.78 (dd, *J* = 11.8, 2.5 Hz, 1H), 3.52 (dd, *J* = 11.9, 6.6 Hz, 1H), 3.34 (dd, *J* = 9.6, 1.2 Hz, 1H), 2.40 (dd, *J* = 13.2, 4.8 Hz, 1H, H-3eq), 1.55 (ddd, *J* = 13.3, 11.3, 5.8 Hz, 1H, H-3ax). HRMS (ESI): *m/z* calcd for C<sub>20</sub>H<sub>30</sub>N<sub>7</sub>O<sub>16</sub>P [M-H]<sup>-</sup>: 654.1414; found: 654.2023.

**Cytidine-5'-monophospho-5-[[2-[4-[2-[2-[2-[2-[(1-biotinyl)amino]ethoxy]ethoxy]ethylamino]oxoethyl]-1*H*-1,2,3-triazol-1-yl]acetyl]amino]-3,5-dideoxy-D-glycero-D-galacto-2-nonulopyranosonic acid (**2**):**

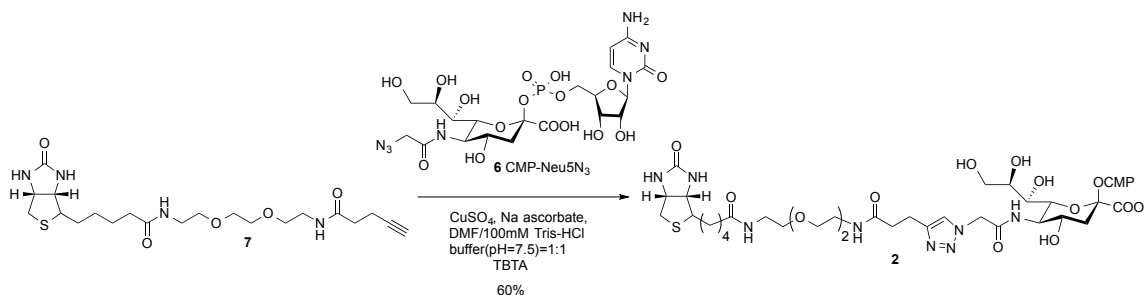

A solution of compound **7** (9 mg, 0.02 mmol) in DMF (1 mL) was added to the solution of CMP-Neu5N<sub>3</sub> (**6**, 10 mg, 0.015 mmol) in Tris-HCl buffer (100 mM, pH 7.5, 1 mL). To this mixture was added CuSO<sub>4</sub> (100 mM, 120 μL), sodium L-ascorbate (100 mM, 150 μL) and TBTA (2.4 mg, 0.0045 mmol). After stirring for 3 h at ambient temperature, the reaction mixture was lyophilized to provide a residue that was applied to a Biogel fine P-2 column (75\*1.5 cm) and eluted with 0.1 M NH<sub>4</sub>HCO<sub>3</sub> at 4 °C in the dark. The product was detected by TLC (<sup>1</sup>iPrOH : aq. NH<sub>4</sub>Cl (20 M) 4 : 1, v:v), and appropriate fractions were combined and lyophilized to provide **2** as a white solid (9.9 mg, 60%). <sup>1</sup>H NMR (500 MHz, D<sub>2</sub>O) δ 7.86 (d, *J* = 7.6 Hz, 1H, H-6, cyt), 7.73 (s, 1H, CH=C, triazole), 6.01 (d, *J* = 7.6 Hz, 1H, H-5, cyt), 5.88 (d, *J* = 4.5 Hz,



1H, H-1, rib), 5.17 (d,  $J = 2.7$  Hz, 2H, triazole-CH<sub>2</sub>-C=O), 4.48 (dd,  $J = 8.0, 4.9$  Hz, 1H, CHNH, biotin), 4.30 (dd,  $J = 8.0, 4.5$  Hz, 1H, CHNH, biotin), 4.23 (t,  $J = 4.9$  Hz, 1H, H-3, rib), 4.19 (t,  $J = 4.8$  Hz, 1H, H-2, rib), 4.15 – 4.07 (m, 4H, H-4 rib, H-5 rib, H-6 Neu), 4.06 – 3.98 (m, 1H, H-4), 3.90 (t,  $J = 10.3$  Hz, 1H, H-5), 3.83 (ddd,  $J = 9.3, 6.4, 2.5$  Hz, 1H, H-8), 3.77 (dd,  $J = 11.8, 2.5$  Hz, 1H, H-9a), 3.59 – 3.49 (m, 7H, H-9b + OCH<sub>2</sub>CH<sub>2</sub>O+NHCH<sub>2</sub>CH<sub>2</sub>O), 3.45 (t,  $J = 5.4$  Hz, 2H, OCH<sub>2</sub>CH<sub>2</sub>NH), 3.35 (dd,  $J = 9.6, 1.1$  Hz, 1H, H-7), 3.30 – 3.22 (m, 4H, NHCH<sub>2</sub>CH<sub>2</sub>O+OCH<sub>2</sub>CH<sub>2</sub>NH), 3.22 – 3.17 (m, 1H, CHS, biotin), 2.92 (t,  $J = 7.3$  Hz, 2H, triazole-CH<sub>2</sub>CH<sub>2</sub>C=O), 2.87 (dd,  $J = 13.1, 5.0$  Hz, 1H, CHHS), 2.66 (d,  $J = 13.0$  Hz, 1H, CHHS), 2.52 (t,  $J = 7.4$  Hz, 2H, triazole-CH<sub>2</sub>CH<sub>2</sub>C=O), 2.39 (dd,  $J = 13.3, 4.8$  Hz, 1H, H-3eq), 2.15 (t,  $J = 7.3$  Hz, 2H, CH<sub>2</sub>CH<sub>2</sub>CH<sub>2</sub>CH<sub>2</sub>C=O, biotin), 1.66 – 1.39 (m, 5H, H-3ax + CH<sub>2</sub>CH<sub>2</sub>CH<sub>2</sub>CH<sub>2</sub>C=O, biotin), 1.34 – 1.23 (m, 2H, CH<sub>2</sub>CH<sub>2</sub>CH<sub>2</sub>CH<sub>2</sub>C=O, biotin). <sup>13</sup>C NMR (126 MHz, D<sub>2</sub>O)  $\delta$  141.7, 124.7, 96.6, 89.1, 82.9, 74.3, 71.6, 69.6, 69.5, 69.4, 68.9, 68.9, 68.8, 66.8, 64.9, 62.9, 62.9, 62.1, 60.2, 55.3, 52.2, 52.0, 41.1, 41.1, 39.7, 39.7, 38.9, 38.9, 35.5, 35.1, 27.8, 27.7, 27.7, 25.1, 21.0. HRMS (ESI):  $m/z$  calcd for C<sub>41</sub>H<sub>63</sub>N<sub>11</sub>O<sub>21</sub>PS [M-H]<sup>-</sup>: 1108.3664; found  $m/z$ : 1108.2461.

### Biotinyl Neu5Ac $\alpha$ (2,6)Gal $\beta$ (1,4)GlcNAc (9S):

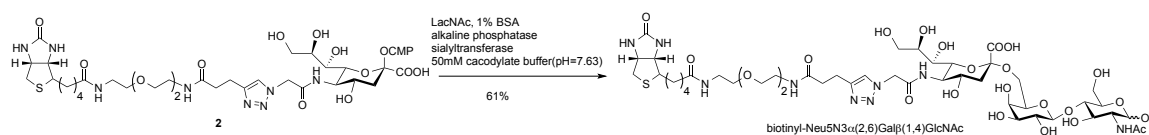

Recombinant  $\alpha$ -(2,6)-sialyltransferase (ST6Gal I) [GenBank P13721] (0.63 mg/mL, 23.2 $\mu$ L)<sup>3</sup> and calf intestine alkaline phosphatase (10000 U/mL, 2.5  $\mu$ L) were added to a mixture of LacNAc (0.43 mg, 1.13  $\mu$ mol) in cacodylate buffer (50 mM, pH 7.63, 96  $\mu$ L) containing 0.1% BSA and **2** (2.5 mg, 2.26  $\mu$ mol) in an Eppendorf tube. The tube was incubated at 37 °C, and progress of the reaction was monitored by TLC (EtOAc : CH<sub>3</sub>OH : H<sub>2</sub>O : AcOH = 4:2:1:0.5, v:v:v:v), which after 5 h indicated completion of the reaction. CH<sub>3</sub>OH (0.5  $\mu$ L) was added and the mixture was lyophilized to provide a residue that was applied to a Biogel fine P-2 column (50\* 1 cm), which was eluted with H<sub>2</sub>O at room temperature. The product was detected by TLC and appropriate fractions were combined and lyophilized to provide **9S** as a white solid (0.8 mg,

61%).  $^1\text{H}$  NMR (600 MHz,  $\text{d}_2\text{o}$ )  $\delta$  7.69 (s, 1H, CH=C, triazole), 5.19 – 5.06 (m, 2H, H-1', H-1''), 4.61 – 4.57 (m, 1H, H5), 4.45 (ddd,  $J = 8.0, 5.0, 0.9$  Hz, 1H, CHNH, biotin), 4.30 (dd,  $J = 7.9, 2.3$  Hz, 1H), 4.27 (dd,  $J = 7.9, 4.5$  Hz, 1H, CHNH, biotin), 3.87 – 3.79 (m, 2H), 3.79 – 3.70 (m, 5H), 3.70 – 3.64 (m, 2H), 3.56 (m, 3H), 3.54 – 3.45 (m, 10H), 3.44 – 3.35 (m, 5H), 3.24 (dd,  $J = 6.2, 4.7$  Hz, 2H, NHCH<sub>2</sub>CH<sub>2</sub>O), 3.21 (t,  $J = 5.2$  Hz, 2H, OCH<sub>2</sub>CH<sub>2</sub>NH), 3.17 (dt,  $J = 9.7, 5.2$  Hz, 1H, CHS, biotin), 2.92 – 2.87 (m, 2H, triazole-CH<sub>2</sub>CH<sub>2</sub>C=O), 2.83 (dd,  $J = 13.1, 5.1$  Hz, 1H, CHHS), 2.62 (d,  $J = 13.3$  Hz, 1H, CHHS), 2.53 (dd,  $J = 12.4, 4.7$  Hz, 1H, H-3eq), 2.49 (td,  $J = 7.3, 1.9$  Hz, 2H, triazole-CH<sub>2</sub>CH<sub>2</sub>C=O), 2.11 (t,  $J = 7.3$  Hz, 2H, CH<sub>2</sub>CH<sub>2</sub>CH<sub>2</sub>CH<sub>2</sub>C=O, biotin), 1.87 (s, 3H, Ac), 1.62–1.37 (m, 5H, H-3ax, CH<sub>2</sub>CH<sub>2</sub>CH<sub>2</sub>CH<sub>2</sub>C=O, biotin), 1.25 (dd,  $J = 8.6, 7.8$  Hz, 2H, CH<sub>2</sub>CH<sub>2</sub>CH<sub>2</sub>CH<sub>2</sub>C=O, biotin).  $^{13}\text{C}$  NMR (151 MHz,  $\text{D}_2\text{O}$ )  $\delta$  124.6, 103.4, 80.7, 73.6, 72.5, 72.4, 72.2, 71.6, 70.7, 69.8, 69.5, 69.3, 69.3, 68.8, 68.8, 68.3, 68.3, 68.2, 68.0, 67.3, 66.8, 63.4, 63.4, 62.8, 62.0, 61.2, 60.0, 55.2, 53.4, 52.0, 51.9, 40.0, 39.5, 39.5, 38.8, 38.8, 35.3, 35.0, 27.8, 27.7, 27.6, 25.2, 22.0, 21.0. HRMS (ESI):  $m/z$  calcd for C<sub>46</sub>H<sub>74</sub>N<sub>9</sub>O<sub>24</sub>S [M-H]<sup>-</sup>: 1168.4573; found: 1168.3288.

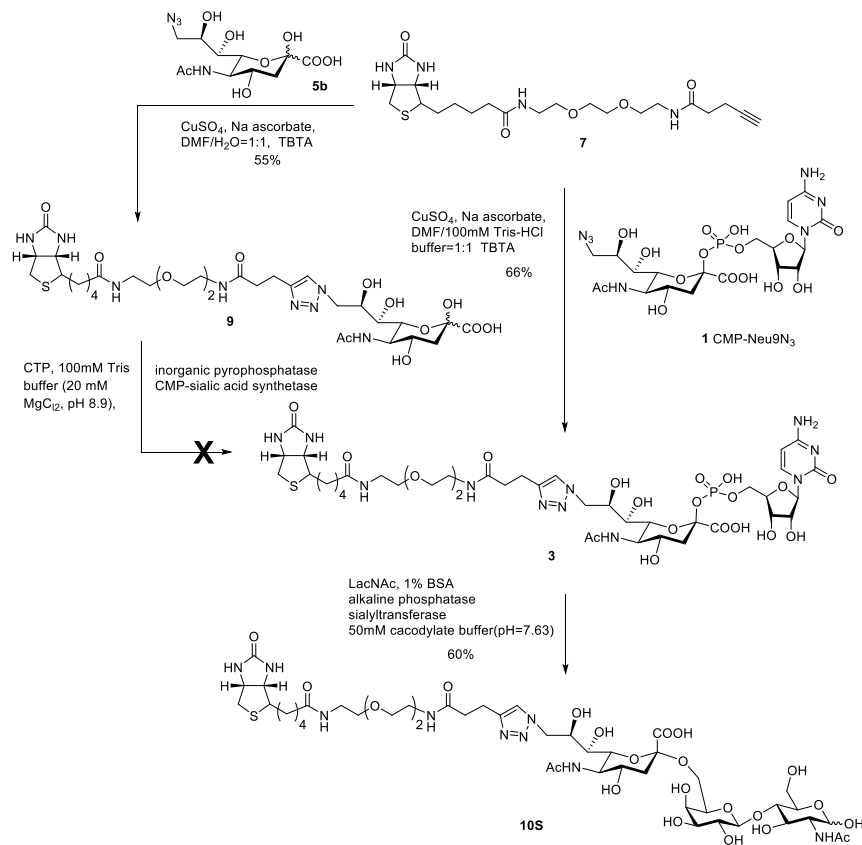

**Scheme S2.** Biotinylation at C9 position of sialic acid.

**5-Acetamido-9-[4-[2-[2-[2-[2-[(1-biotinyl)amino]ethoxy]ethoxy]ethylamino]oxoethyl]-1*H*-1,2,3-triazol-1-yl]-3,5,9-tri-deoxy-D-glycero-D-galacto-2-nonulosonic acid (9):**

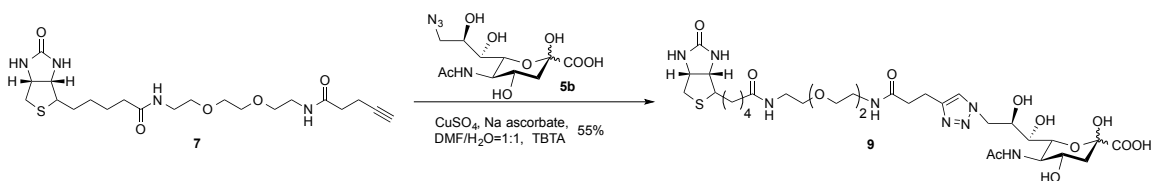

A solution of compound **7** (50 mg, 0.11 mmol) in DMF (5 mL) was added to the solution of **5b** (28.0 mg, 0.08 mmol)<sup>3</sup> in H<sub>2</sub>O (5 mL). To this mixture was added CuSO<sub>4</sub> (100 mM, 640 μL), sodium L-ascorbate (100, mM 800 μL) and TBTA (5 mg, 0.02 mmol). After stirring for 3.5 h at ambient temperature, the reaction mixture was concentrated under reduced pressure to provide a crude material, and this residue was purified by silica gel column chromatography (MeOH/DCM, 5:1, v/v). The product was detected by TLC (*i*-PrOH : 20 mM NH<sub>4</sub>Cl, 4:1, v:v), and appropriate

fractions were combined and concentrated to provide **9** as a white solid (37 mg, 55%). <sup>1</sup>H NMR (500 MHz, CD<sub>3</sub>OD) δ 7.93 (m, 1H, CH=C, triazole), 4.51 (s, 1H, CHNH, biotin), 4.35 – 4.30 (m, 2H ), 4.02 (m, 4H), 3.62 (s, 4H, OCH<sub>2</sub>CH<sub>2</sub>O), 3.59 – 3.52 (m, 4H, NHCH<sub>2</sub>CH<sub>2</sub>O, OCH<sub>2</sub>CH<sub>2</sub>NH), 3.45 – 3.33 (m, 6H, NHCH<sub>2</sub>CH<sub>2</sub>O, OCH<sub>2</sub>CH<sub>2</sub>NH, H-9), 3.28 – 3.18 (m, 1H, CHS biotin), 3.01 (m, 2H, C=OCH<sub>2</sub>CH<sub>2</sub>-triazole), 2.94 (dd, *J* = 12.6, 4.3 Hz, 1H, CHHS), 2.73 (d, *J* = 12.6 Hz, 1H, CHHS), 2.59 (m, 2H, C=OCH<sub>2</sub>CH<sub>2</sub> triazole), 2.24 (t, *J* = 7.1 Hz, 2H, CH<sub>2</sub>CH<sub>2</sub>CH<sub>2</sub>CH<sub>2</sub>C=O, biotin), 2.19 – 1.88 (m, 5H, NCH<sub>3</sub>, H3), 1.83 – 1.41 (m, 6H, CH<sub>2</sub>CH<sub>2</sub>CH<sub>2</sub>CH<sub>2</sub>C=O). <sup>13</sup>C NMR (126 MHz, CD<sub>3</sub>OD) δ 70.3, 69.9, 69.3, 68.7, 62.7, 60.3, 55.6, 53.9, 53.4, 52.7, 52.7, 39.7, 39.7, 38.9, 35.4, 35.0, 28.4, 28.1, 28.1, 25.4, 21.5, 21.3. HRMS (ESI): *m/z* calcd for C<sub>32</sub>H<sub>52</sub>N<sub>8</sub>O<sub>13</sub>S [M-H]<sup>-</sup>: 787.3302; found: 787.1547.

**Cytidine-5'-monophospho-5-Acetamido-9-[4-[2-[2-[2-[2-[(1-biotinyl)amino]ethoxy]ethoxy]ethylamino]oxoethyl]-1*H*-1,2,3-triazol-1-yl]-3,5,9-tri-deoxy-D-glycero-D-galacto-2-nonulopyranosonic acid (**3**):**

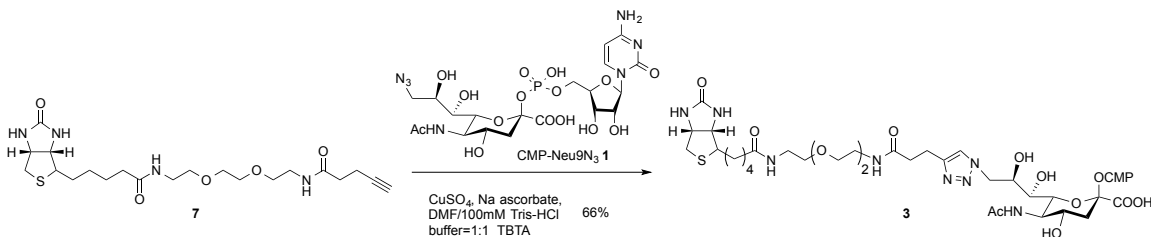

The solution of **7** (5.9 mg, 0.013 mmol) in DMF (500 μL) was added to the solution of CMP-Neu9N<sub>3</sub> (**1**, 8.0 mg, 0.012 mmol)<sup>4</sup> in Tris-HCl buffer (100 mM, pH 7.5, 500 μL). To this mixture was added CuSO<sub>4</sub> (100 mM, 80 μL), sodium L-ascorbate (100 mM, 100 μL) and TBTA (1.6 mg, 0.003 mmol). After stirring for 3.5 h at ambient temperature, the reaction mixture was lyophilized to provide a crude material, which was applied on a Biogel fine P-2 column (75\*1.5 cm) and eluted with 0.1 M aqueous NH<sub>4</sub>HCO<sub>3</sub> at 4 °C in the dark. The product was detected by TLC (<sup>i</sup>PrOH: aq. NH<sub>4</sub>Cl (20 mM), 4:1, v:v), and appropriate fractions were combined and lyophilized to provide **3** as a white solid (9.1 mg, 66%). <sup>1</sup>H NMR (600 MHz, D<sub>2</sub>O) δ 7.67 (d, *J* = 7.6 Hz, 1H, H-6, cyt), 7.62 (s, 1H, CH=C, triazole), 5.83 (d, *J* = 7.6 Hz, 1H, H-5, cyt), 5.78 (d, *J*

= 5.0 Hz, 1H, H-1, rib), 4.62-4.59 (m, 3H, H-4 rib + H-5 rib), 4.40 (dd,  $J = 8.0, 5.2$  Hz, 1H, CHNH, biotin), 4.25 – 4.18 (m, 2H, CHNH biotin, H-3, rib), 4.06 – 4.03 (m, 1H, H-2, rib), 4.03 – 3.92 (m, 3H, H-5, H-7, H-8), 3.89 (td,  $J = 11.0, 4.0$  Hz, 1H, H-4), 3.75 (t,  $J = 10.3$  Hz, 1H, H-6), 3.50 – 3.40 (m, 7H, H-9a, OCH<sub>2</sub>CH<sub>2</sub>O, NHCH<sub>2</sub>CH<sub>2</sub>O), 3.36 (dd,  $J = 6.8, 3.9$  Hz, 2H, OCH<sub>2</sub>CH<sub>2</sub>NH), 3.23–3.08 (m, 6H, NHCH<sub>2</sub>CH<sub>2</sub>O, OCH<sub>2</sub>CH<sub>2</sub>NH, H-9b, CHS biotin), 2.86–2.73 (m, 3H, triazole-CH<sub>2</sub>CH<sub>2</sub>C=O, CHHS), 2.57 (dd,  $J = 13.1, 3.1$  Hz, 1H, CHHS), 2.46 – 2.37 (m, 2H, triazole-CH<sub>2</sub>CH<sub>2</sub>C=O), 2.29 (dt,  $J = 13.2, 3.9$  Hz, 1H, H-3eq), 2.06 (td,  $J = 7.3, 3.0$  Hz, 2H, CH<sub>2</sub>CH<sub>2</sub>CH<sub>2</sub>CH<sub>2</sub>C=O, biotin), 1.84 (d,  $J = 3.0$  Hz, 3H, NAc), 1.54 – 1.32 (m, 5H, H-3ax, CH<sub>2</sub>CH<sub>2</sub>CH<sub>2</sub>CH<sub>2</sub>C=O, biotin), 1.19 (ddt,  $J = 15.3, 9.2, 7.8, 4.3$  Hz, 2H, CH<sub>2</sub>CH<sub>2</sub>CH<sub>2</sub>CH<sub>2</sub>C=O, biotin). <sup>13</sup>C NMR (600 MHz, D<sub>2</sub>O)  $\delta$  141.2, 123.9, 96.4, 88.6, 83.0, 74.4, 71.5, 71.5, 69.8, 69.5, 69.3, 69.0, 68.7, 68.4, 66.5, 65.1, 61.9, 60.1, 55.2, 51.9, 41.1, 39.9, 39.6, 38.7, 38.4, 35.2, 35.1, 27.8, 25.2, 24.9, 22.1, 21.0. HRMS (ESI):  $m/z$  calcd for C<sub>41</sub>H<sub>64</sub>N<sub>11</sub>O<sub>20</sub>PS [M-H]<sup>-</sup>, 1092.3715; found: 1092.3482.

### Biotinyl Neu9N<sub>3</sub> $\alpha$ (2,6)Gal $\beta$ (1,4)GlcNAc (**10S**):

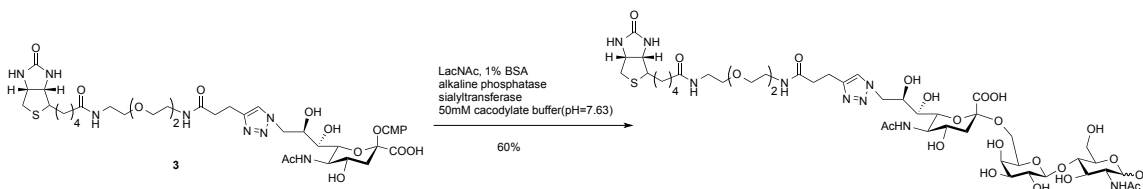

Recombinant  $\alpha$ -(2,6)-sialyltransferase (ST6Gal I) [GenBank P13721] (2.18 mg/mL, 6.7  $\mu$ L) and calf intestine alkaline phosphatase (1000 U/mL, 24.5  $\mu$ L) were added to a mixture of LacNAc (0.5 mg, 1.3  $\mu$ mol) in cacodylate buffer (50 mM, pH 7.63, 96  $\mu$ L) containing 0.1% BSA and **3** (2.8 mg, 2.6  $\mu$ mol) in an Eppendorf tube. The tube was incubated at 37 °C, and progress of the reaction was monitored by TLC (EtOAc : CH<sub>3</sub>OH : H<sub>2</sub>O : AcOH = 4:2:1:0.5, v:v:v:v), which after 5 h indicated completion of the reaction. CH<sub>3</sub>OH (0.5  $\mu$ L) was added and the resulting solution was lyophilized to provide a residue that was applied on a Biogel fine P-2 column (50\* 1 cm), which was eluted with H<sub>2</sub>O at room temperature. The product was detected by TLC, and appropriate fractions were combined and lyophilized to provide **10S** as a white solid (0.9 mg,

60%). <sup>1</sup>H NMR (600 MHz, D<sub>2</sub>O) δ 7.92 (s, 1H, CH=C, triazole), 5.76 (q, *J* = 1.9 Hz, 0.2H, H-1'), 5.28 (dd, *J* = 3.3, 1.3 Hz, 0.8H, H-1'), 4.86 – 4.80 (m, 1H, H-1''), 4.71 – 4.65 (m, 1H, CHNH, biotin), 4.59 (dddd, *J* = 17.2, 9.4, 5.2, 1.3 Hz, 1H), 4.56 – 4.47 (m, 2H), 4.38 – 4.23 (m, 1H, H-5), 4.09 – 4.00 (m, 2H), 3.97 (qd, *J* = 5.8, 1.8 Hz, 2H), 3.94 – 3.86 (m, 2H), 3.86 – 3.78 (m, 4H, OCH<sub>2</sub>CH<sub>2</sub>O), 3.77 – 3.67 (m, 10H), 3.67 – 3.57 (m, 3H), 3.49 – 3.37 (m, 5H, NHCH<sub>2</sub>CH<sub>2</sub>O, OCH<sub>2</sub>CH<sub>2</sub>NH, CHS biotin), 3.10 (t, *J* = 7.4 Hz, 2H, triazole-CH<sub>2</sub>CH<sub>2</sub>C=O), 3.06 (ddt, *J* = 13.0, 5.1, 1.4 Hz, 1H, CHHS), 2.85 (d, *J* = 13.1 Hz, 1H, CHHS), 2.75 – 2.68 (m, 3H, H-3eq + triazole-CH<sub>2</sub>CH<sub>2</sub>C=O), 2.36 – 2.32 (m, 2H, CH<sub>2</sub>CH<sub>2</sub>CH<sub>2</sub>CH<sub>2</sub>C=O, biotin), 2.14 (d, *J* = 12.0 Hz, 3H, NAc), 2.09 (d, *J* = 1.3 Hz, 3H, NAc), 1.83 – 1.60 (m, 5H, H-3ax + CH<sub>2</sub>CH<sub>2</sub>CH<sub>2</sub>CH<sub>2</sub>C=O, biotin), 1.47 (ddt, *J* = 12.4, 9.3, 7.0 Hz, 2H CH<sub>2</sub>CH<sub>2</sub>CH<sub>2</sub>CH<sub>2</sub>C=O, biotin). <sup>13</sup>C NMR (600 MHz, D<sub>2</sub>O) δ 124.1, 107.5, 103.4, 94.6, 90.5, 80.8, 74.5, 73.6, 72.9, 72.4, 70.6, 69.9, 69.8, 69.5, 69.5, 69.4, 69.3, 68.8, 68.7, 67.9, 67.3, 67.2, 63.4, 63.4, 62, 60.3, 60.3, 60.1, 60.1, 59.2, 55.3, 53.4, 52.8, 52.8, 52.7, 51.8, 40, 40, 39.6, 39.6, 38.8, 38.8, 35.3, 35.1, 27.8, 27.6, 27.6, 25, 22, 21.9, 21. HRMS (ESI): *m/z* calcd for C<sub>46</sub>H<sub>75</sub>N<sub>9</sub>O<sub>23</sub>S [M-H]<sup>-</sup>: 1152.4624; found: 1152.2786.

### **Kinetic analysis of ST6Gal1 using CMP-Neu5Ac and biotinylated CMP-NeuAc**

Kinetic analysis of rat ST6Gal1 with CMP-Neu5Ac and its derivatives was performed in MES buffer (100 mM, pH 6.5) containing 0.014 μg/μL rat ST6Gal1, LacNac (2.4 mM), and CMP-Neu5Ac or derivatives (0.0125-0.4 mM) in a total reaction volume of 25 μL. Reaction mixtures were incubated for 30 min at 37 °C and stopped by cooling to 4 °C for 2 min. Released CMP was quantified using the CMP-Glo<sup>TM</sup> sialyltransferase assay (Promega) by bioluminescent detection of the CMP reaction product as described by the manufacturer. Briefly, the sialyltransferase reaction products (5 μL) were mixed with an equal volume of CMP-Glo assay reagent to convert CMP to ATP and subsequent detection using a luciferase/luciferin reaction. The reaction was incubated at room temperature for 1 h and read on a luminometer (GloMax<sup>®</sup>-Multi+, Promega) and compared to values from a CMP standard curve. *K<sub>m</sub>* values were determined by curve fitting using GraphPad Prism software.

## References

1. Ning, X. H., Guo, J., Wolfert, M. A. & Boons, G. J. Visualizing metabolically labeled glycoconjugates of living cells by copper-free and fast Huisgen cycloadditions. *Angew. Chem. Int. Ed.* **47**, 2253-2255 (2008).
2. Yu, H., Yu, H., Karpel, R. & Chen, X. Chemoenzymatic synthesis of CMP-sialic acid derivatives by a one-pot two-enzyme system: comparison of substrate flexibility of three microbial CMP-sialic acid synthetases. *Bioorg. Med. Chem.* **12**, 6427-6435 (2004).
3. Mbua, N. E. *et al.* Selective exo-enzymatic labeling of N-glycans on the surface of living cells by recombinant ST6Gal I. *Angew. Chem. Int. Ed.* **52**, 13012-13015 (2013).
4. Rauvolfova, J., Venot, A. & Boons, G. J. Chemo-enzymatic synthesis of C-9 acetylated sialosides. *Carbohydr. Res.* **343**, 1605-1611 (2008).

# Copies of NMR Spectra

## Compound 7

ts-2-069\_Proton\_2013May17\_01

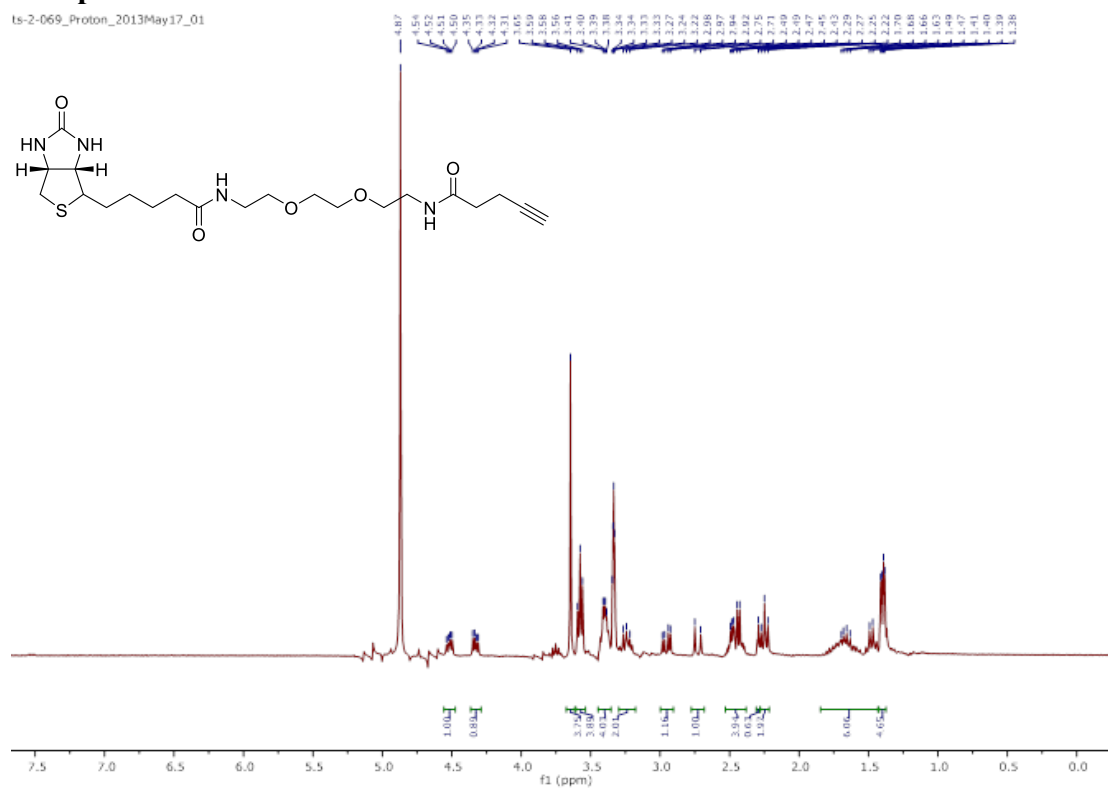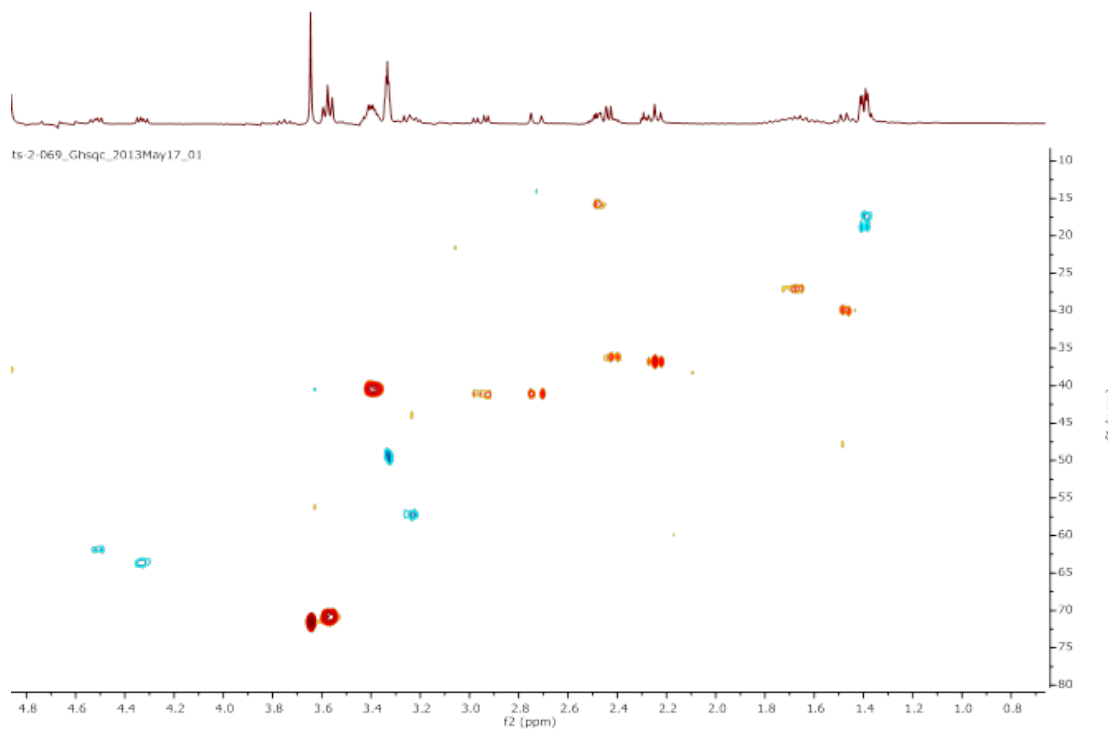





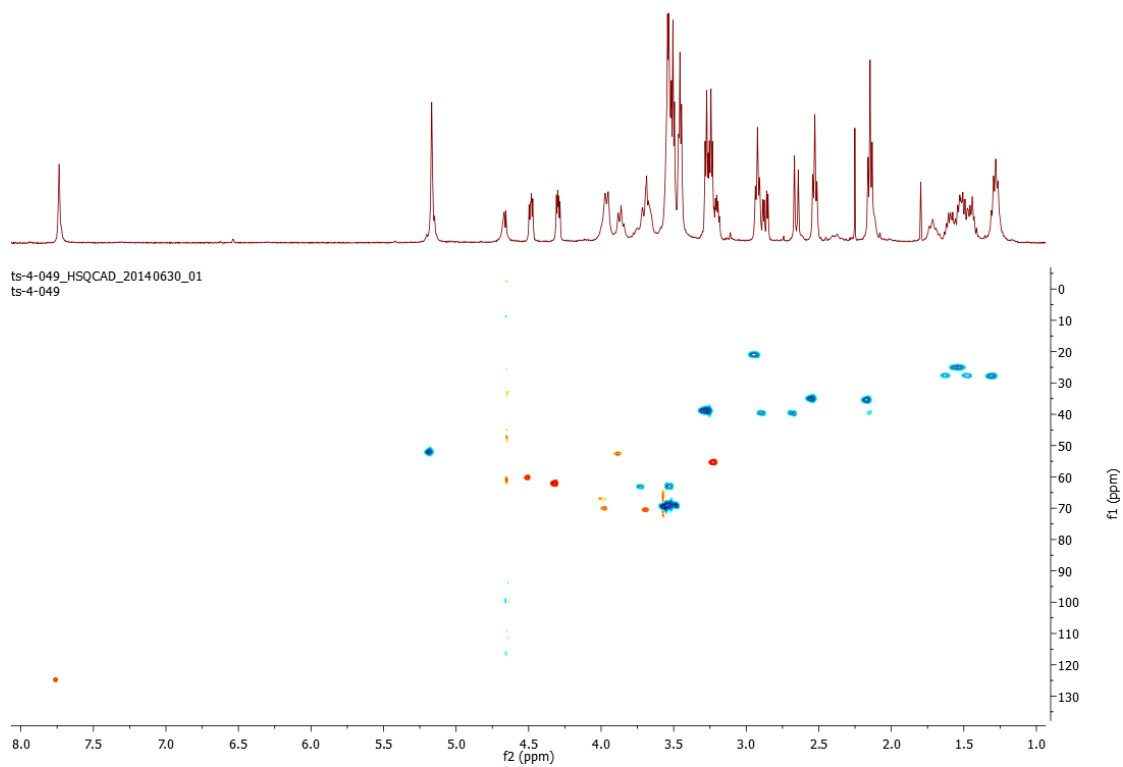

## Compound 6

ts-4-028\_PRESAT\_20140528\_01  
ts-4-028

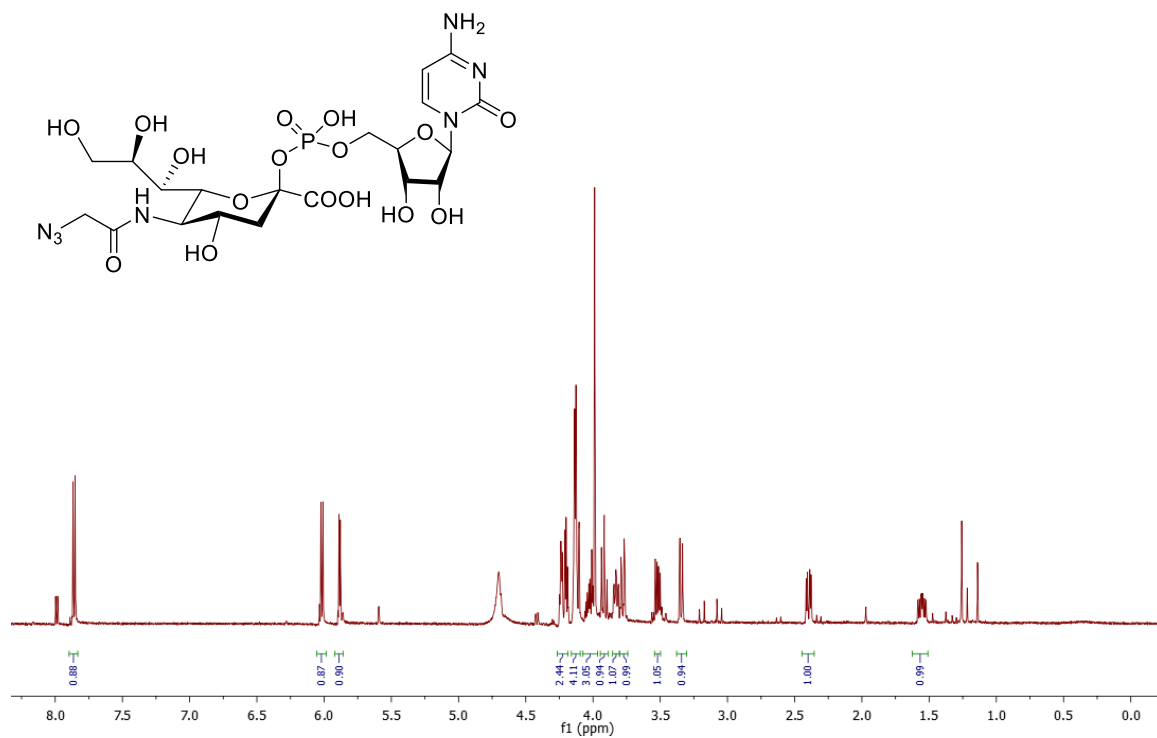



# Biotinyl-Neu5Ac $\alpha$ (2,6)Gal $\beta$ (1,4)GlcNAc (9S)

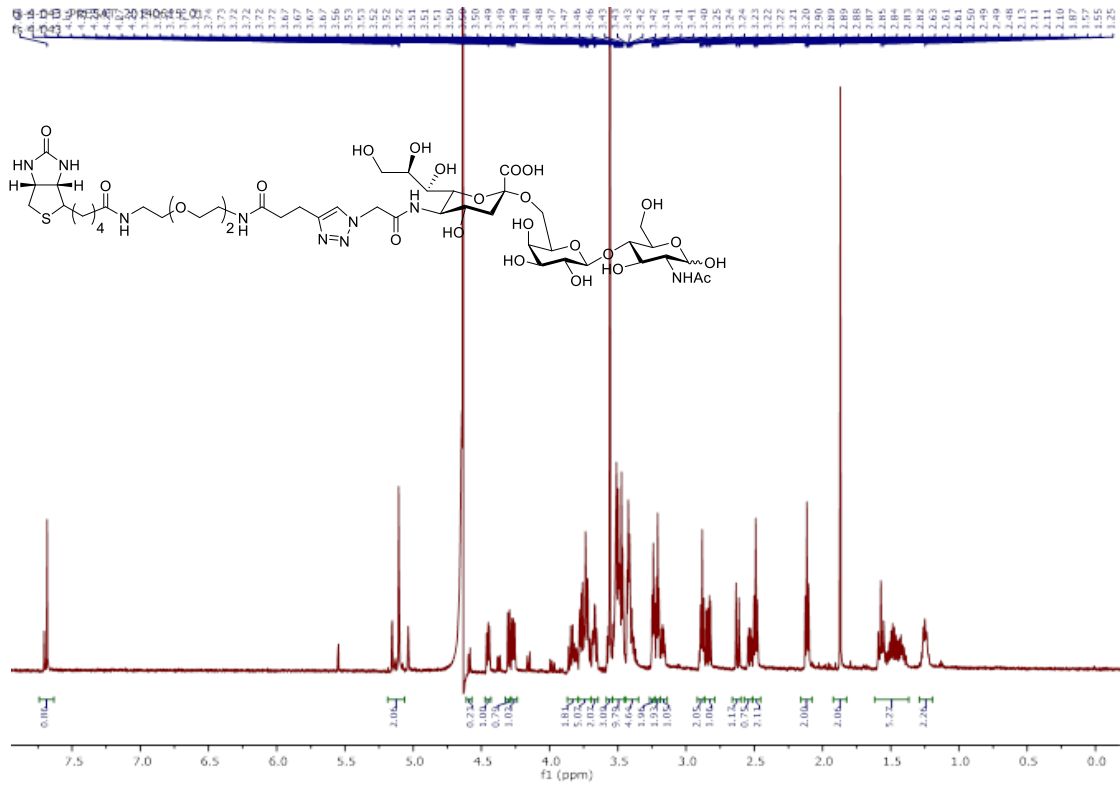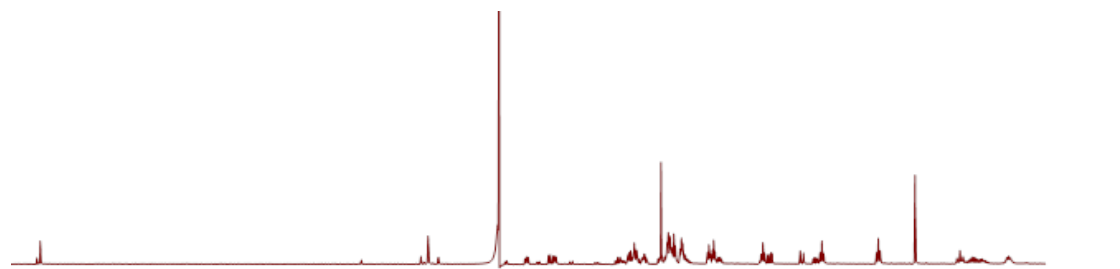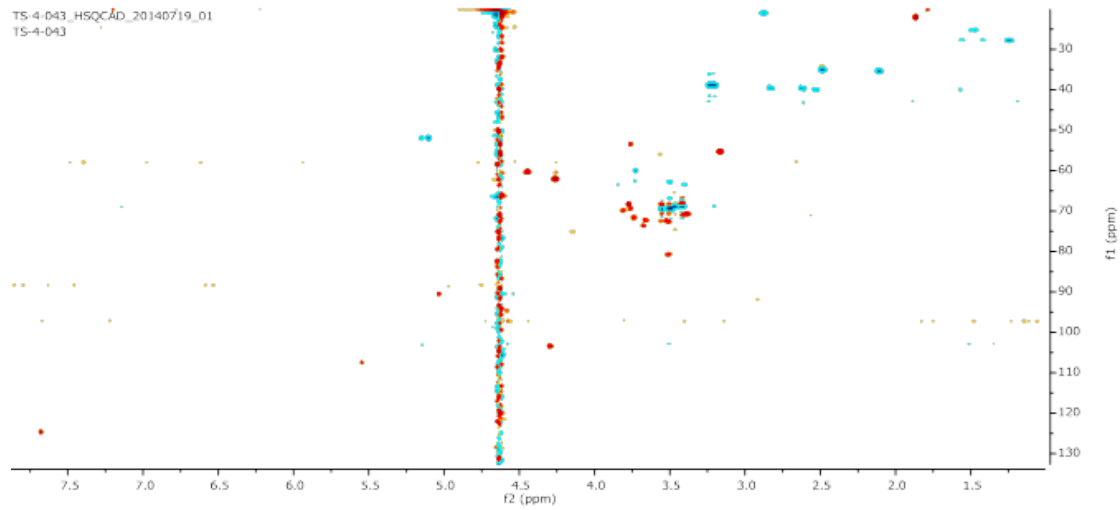

# Compound 9

ts-2-098\_PROTON\_20130726\_01  
STANDARD 1H OBSERVE F1 profile

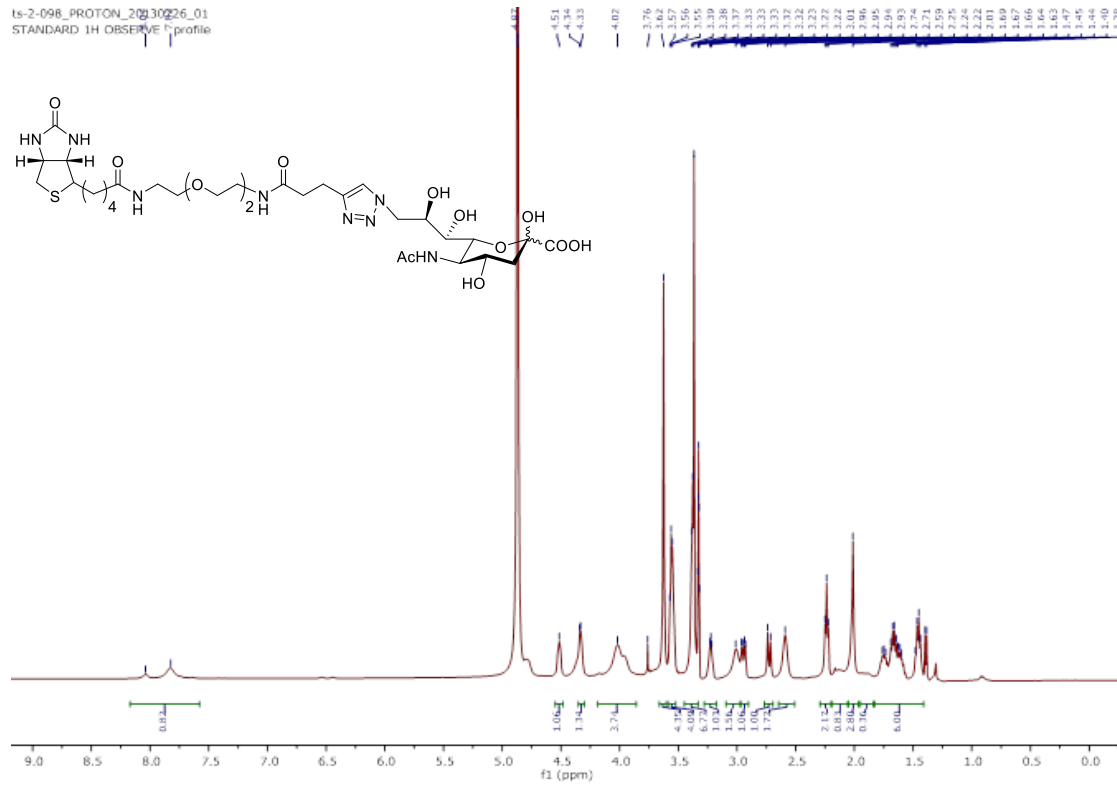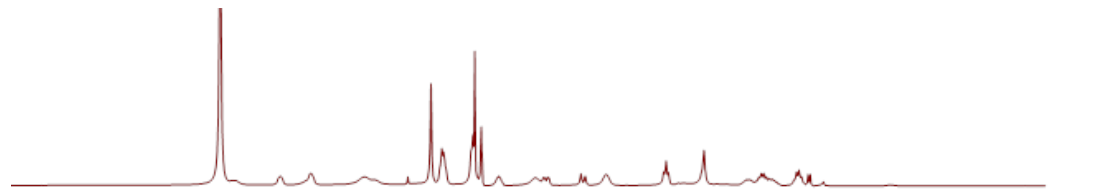

ts-2-098\_HSQCAD\_20130726\_01  
ts-2-098

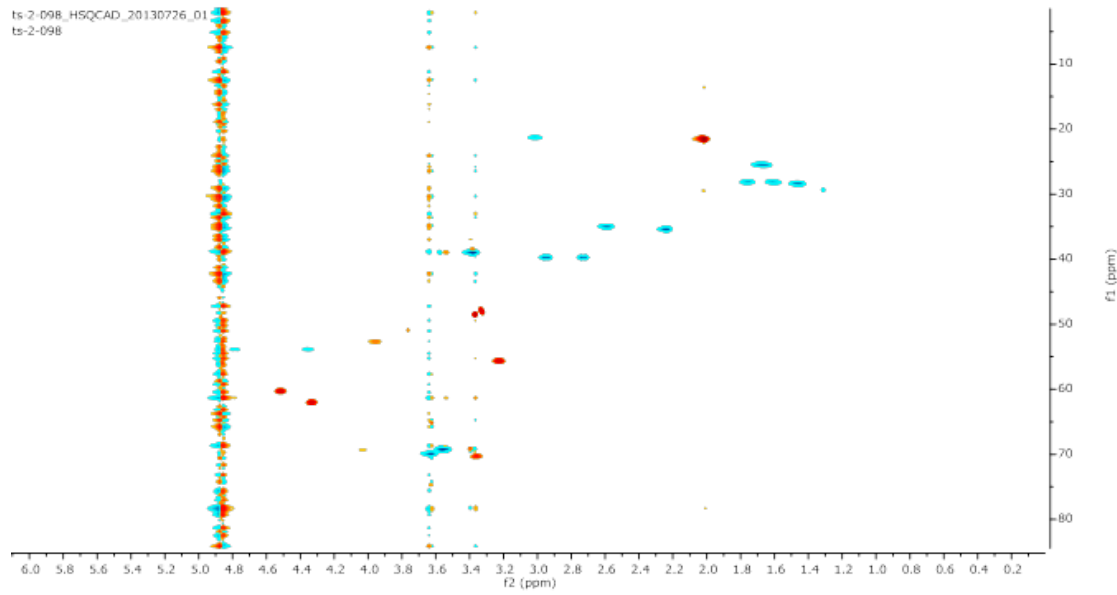

# Compound 3

ts-2-106\_HSQCAD\_20130803\_01  
 PR7547120130803\_01  
 4.06 4.05 4.04 4.03 4.02 4.01 4.00 3.99 3.98 3.97 3.96 3.95 3.94 3.93 3.92 3.91 3.90 3.89 3.88 3.87 3.86 3.85 3.84 3.83 3.82 3.81 3.80 3.79 3.78 3.77 3.76 3.75 3.74 3.73 3.72 3.71 3.70 3.69 3.68 3.67 3.66 3.65 3.64 3.63 3.62 3.61 3.60 3.59 3.58 3.57 3.56 3.55 3.54 3.53 3.52 3.51 3.50 3.49 3.48 3.47 3.46 3.45 3.44 3.43 3.42 3.41 3.40 3.39 3.38 3.37 3.36 3.35 3.34 3.33 3.32 3.31 3.30 3.29 3.28 3.27 3.26 3.25 3.24 3.23 3.22 3.21 3.20 3.19 3.18 3.17 3.16 3.15 3.14 3.13 3.12 3.11 3.10 3.09 3.08 3.07 3.06 3.05 3.04 3.03 3.02 3.01 3.00 2.99 2.98 2.97 2.96 2.95 2.94 2.93 2.92 2.91 2.90 2.89 2.88 2.87 2.86 2.85 2.84 2.83 2.82 2.81 2.80 2.79 2.78 2.77 2.76 2.75 2.74 2.73 2.72 2.71 2.70 2.69 2.68 2.67 2.66 2.65 2.64 2.63 2.62 2.61 2.60 2.59 2.58 2.57 2.56 2.55 2.54 2.53 2.52 2.51 2.50 2.49 2.48 2.47 2.46 2.45 2.44 2.43 2.42 2.41 2.40 2.39 2.38 2.37 2.36 2.35 2.34 2.33 2.32 2.31 2.30 2.29 2.28 2.27 2.26 2.25 2.24 2.23 2.22 2.21 2.20 2.19 2.18 2.17 2.16 2.15 2.14 2.13 2.12 2.11 2.10 2.09 2.08 2.07 2.06 2.05 2.04 2.03 2.02 2.01 2.00 1.99 1.98 1.97 1.96 1.95 1.94 1.93 1.92 1.91 1.90 1.89 1.88 1.87 1.86 1.85 1.84 1.83 1.82 1.81 1.80 1.79 1.78 1.77 1.76 1.75 1.74 1.73 1.72 1.71 1.70 1.69 1.68 1.67 1.66 1.65 1.64 1.63 1.62 1.61 1.60 1.59 1.58 1.57 1.56 1.55 1.54 1.53 1.52 1.51 1.50 1.49 1.48 1.47 1.46 1.45 1.44 1.43 1.42 1.41 1.40 1.39 1.38 1.37 1.36 1.35 1.34 1.33 1.32 1.31 1.30 1.29 1.28 1.27 1.26 1.25 1.24 1.23 1.22 1.21 1.20 1.19 1.18 1.17 1.16 1.15 1.14 1.13 1.12 1.11 1.10 1.09 1.08 1.07 1.06 1.05 1.04 1.03 1.02 1.01 1.00 0.99 0.98 0.97 0.96 0.95 0.94 0.93 0.92 0.91 0.90 0.89 0.88 0.87 0.86 0.85 0.84 0.83 0.82 0.81 0.80 0.79 0.78 0.77 0.76 0.75 0.74 0.73 0.72 0.71 0.70 0.69 0.68 0.67 0.66 0.65 0.64 0.63 0.62 0.61 0.60 0.59 0.58 0.57 0.56 0.55 0.54 0.53 0.52 0.51 0.50 0.49 0.48 0.47 0.46 0.45 0.44 0.43 0.42 0.41 0.40 0.39 0.38 0.37 0.36 0.35 0.34 0.33 0.32 0.31 0.30 0.29 0.28 0.27 0.26 0.25 0.24 0.23 0.22 0.21 0.20 0.19 0.18 0.17 0.16 0.15 0.14 0.13 0.12 0.11 0.10 0.09 0.08 0.07 0.06 0.05 0.04 0.03 0.02 0.01 0.00

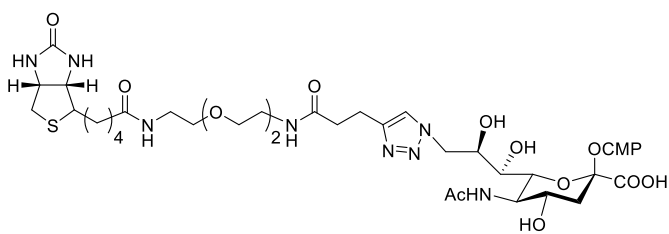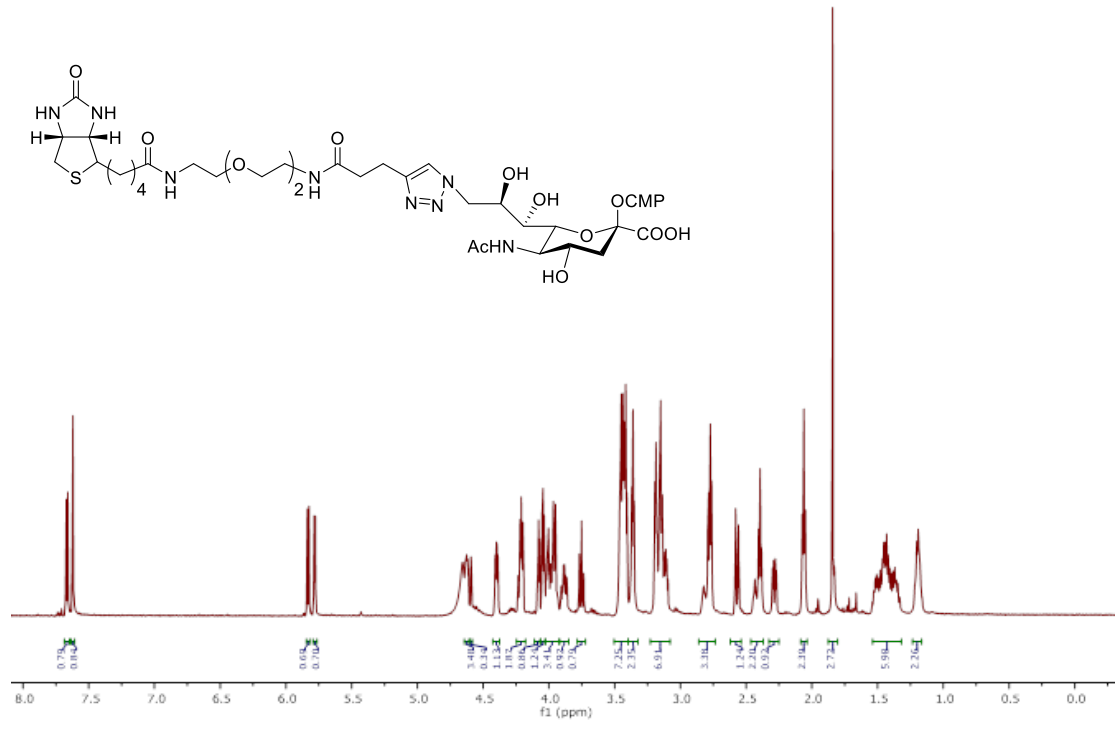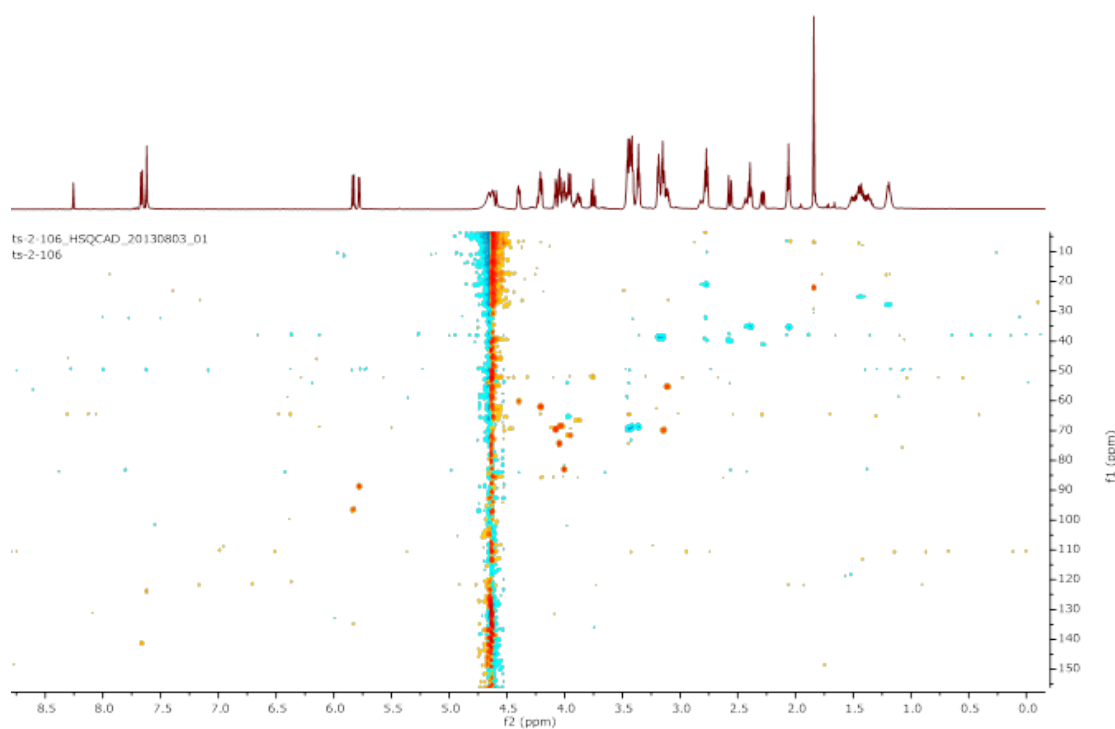

# Biotinyl-Neu9N<sub>3</sub>α(2,6)Galβ(1,4)GlcNAc (10S)

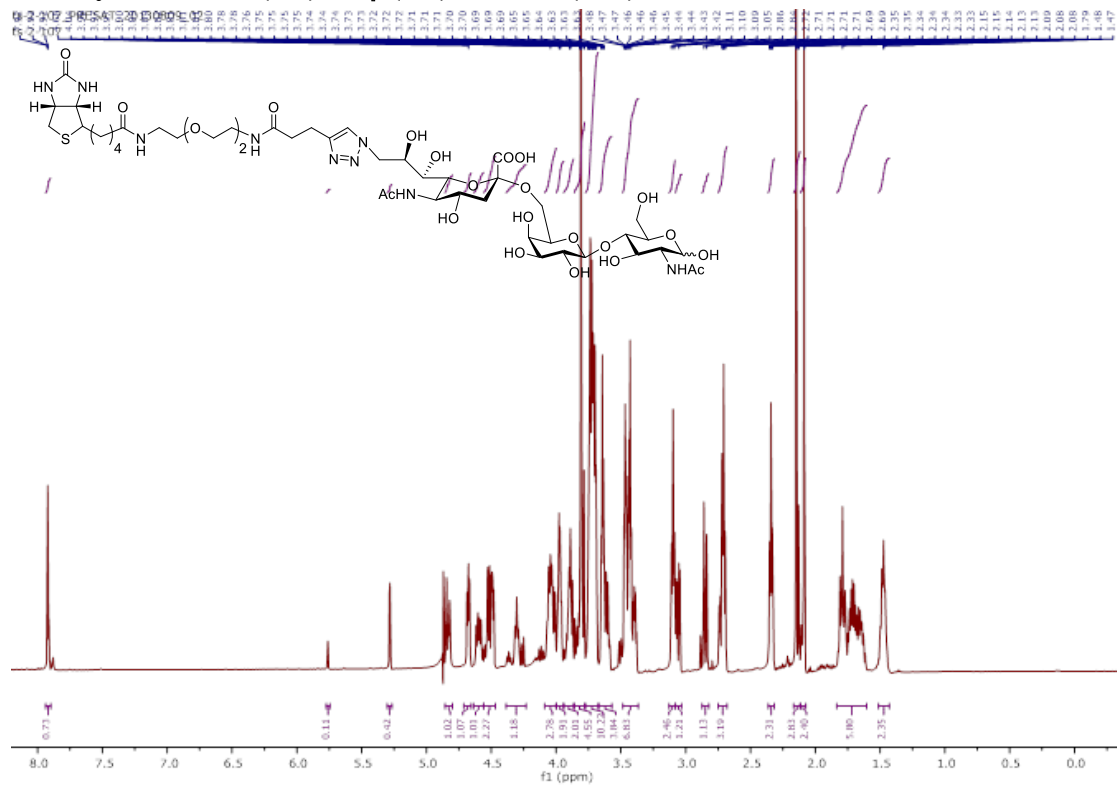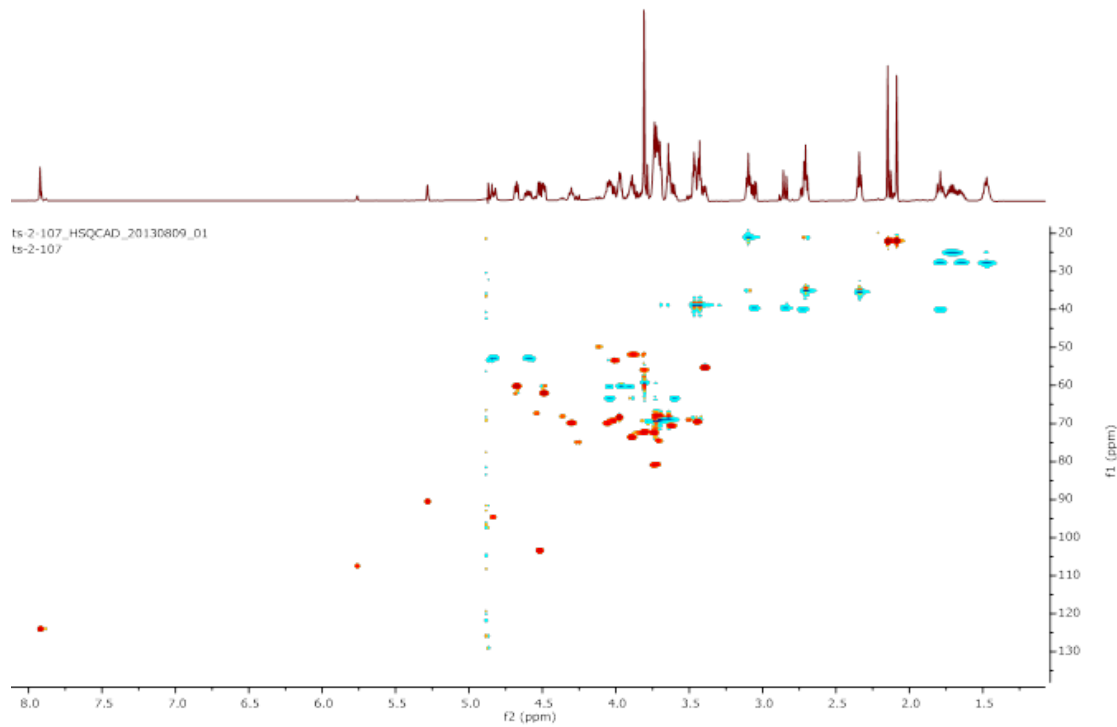

Supplement: NIHMS822136-supplement-SI.pdf [file NIHMS822136-supplement-SI.pdf]
